# Supplementary material for: Essential metabolism for a minimal cell
Source: eLife. 2019 Jan 18;8:e36842. doi: 10.7554/eLife.36842 (PMC6609329; doi:10.7554/eLife.36842)
Supplement: Supplementary file 2. [file elife-36842-supp2.xlsx]

## Sheet: Transposon positions
First nucleotide	Last nucleotide	Complementary strand?	Passage	Insertion in duplicate sequence?	Transposon direction	Cloning label gene?
1379	1398		P0		f
1439	1458		P0		f
1446	1465		P0		f
1446	1465		P1		f
1446	1465		P4		f
1429	1448	complement	P0		r
1436	1455	complement	P4		r
1502	1521		P0		f
1492	1511	complement	P0		r
2519	2538		P0		f
2587	2606	complement	P0		r
2608	2627		P1		f
2599	2618	complement	P0		r
2599	2618	complement	P1		r
2599	2618	complement	P4		r
2676	2695		P0		f
2666	2685	complement	P0		r
2706	2725		P0		f
2706	2725		P1		f
2706	2725		P4		f
2696	2715	complement	P1		r
2696	2715	complement	P4		r
2735	2754		P0		f
2751	2770		P0		f
2741	2760	complement	P0		r
2741	2760	complement	P1		r
2741	2760	complement	P4		r
2773	2792		P0		f
2773	2792		P1		f
2773	2792		P4		f
2763	2782	complement	P0		r
2763	2782	complement	P1		r
2763	2782	complement	P4		r
2764	2783	complement	P0		r
2795	2814		P0		f
2795	2814		P1		f
2795	2814		P4		f
2785	2804	complement	P0		r
2785	2804	complement	P1		r
2785	2804	complement	P4		r
2820	2839		P0		f
2825	2844		P4		f
2848	2867		P0		f
2848	2867		P1		f
2853	2872		P0		f
2853	2872		P1		f
2853	2872		P4		f
2838	2857	complement	P0		r
2843	2862	complement	P0		r
2843	2862	complement	P1		r
2882	2901		P0		f
2882	2901		P1		f
2884	2903		P0		f
2884	2903		P1		f
2872	2891	complement	P0		r
2872	2891	complement	P1		r
2872	2891	complement	P4		r
2874	2893	complement	P0		r
2874	2893	complement	P1		r
2874	2893	complement	P4		r
2898	2917	complement	P1		r
2940	2959		P0		f
2930	2949	complement	P1		r
2977	2996		P0		f
2980	2999		P1		f
2963	2982	complement	P0		r
2970	2989	complement	P0		r
2970	2989	complement	P1		r
2970	2989	complement	P4		r
2979	2998	complement	P0		r
2979	2998	complement	P1		r
2988	3007	complement	P0		r
3038	3057		P0		f
3038	3057		P1		f
3038	3057		P4		f
3028	3047	complement	P0		r
3028	3047	complement	P1		r
3028	3047	complement	P4		r
3089	3108		P0		f
3089	3108		P1		f
3089	3108		P4		f
3079	3098	complement	P0		r
3079	3098	complement	P1		r
3079	3098	complement	P4		r
3098	3117		P0		f
3088	3107	complement	P0		r
3217	3236	complement	P0		r
3347	3366		P0		f
3336	3355	complement	P0		r
3336	3355	complement	P4		r
3363	3382		P1		f
3363	3382		P4		f
3365	3384		P0		f
3365	3384		P4		f
3353	3372	complement	P0		r
3353	3372	complement	P4		r
3355	3374	complement	P1		r
3355	3374	complement	P4		r
3388	3407		P0		f
3378	3397	complement	P0		r
3378	3397	complement	P1		r
3378	3397	complement	P4		r
3464	3483		P0		f
3464	3483		P1		f
3454	3473	complement	P0		r
3454	3473	complement	P1		r
3501	3520		P1		f
3501	3520		P4		f
3507	3526		P4		f
3491	3510	complement	P1		r
3491	3510	complement	P4		r
3497	3516	complement	P0		r
3497	3516	complement	P1		r
3497	3516	complement	P4		r
3517	3536		P0		f
3517	3536		P1		f
3517	3536		P4		f
3524	3543		P0		f
3507	3526	complement	P1		r
3507	3526	complement	P4		r
3514	3533	complement	P0		r
3514	3533	complement	P1		r
3601	3620		P0		f
3591	3610	complement	P0		r
3605	3624	complement	P0		r
3651	3670		P0		f
3658	3677		P0		f
3641	3660	complement	P0		r
3648	3667	complement	P0		r
3676	3695		P0		f
3676	3695		P1		f
3676	3695		P4		f
3684	3703		P0		f
3684	3703		P1		f
3666	3685	complement	P0		r
3666	3685	complement	P1		r
3666	3685	complement	P4		r
3692	3711		P1		f
3692	3711		P4		f
3721	3740		P0		f
3721	3740		P1		f
3721	3740		P4		f
3711	3730	complement	P0		r
3711	3730	complement	P1		r
3711	3730	complement	P4		r
3734	3753		P0		f
3734	3753		P1		f
3734	3753		P4		f
3723	3742	complement	P0		r
3723	3742	complement	P4		r
3854	3873		P0		f
3844	3863	complement	P0		r
3844	3863	complement	P1		r
3844	3863	complement	P4		r
3873	3892		P0		f
3878	3897		P1		f
3863	3882	complement	P0		r
3896	3915		P0		f
3896	3915		P1		f
3896	3915		P4		f
3886	3905	complement	P0		r
3915	3934		P1		f
3915	3934		P4		f
3921	3940		P0		f
3921	3940		P1		f
3905	3924	complement	P1		r
3910	3929	complement	P1		r
3934	3953		P0		f
3934	3953		P1		f
3939	3958		P0		f
3924	3943	complement	P0		r
3934	3953	complement	P0		r
3939	3958	complement	P0		r
3939	3958	complement	P1		r
3939	3958	complement	P4		r
3988	4007		P0		f
3988	4007		P1		f
3988	4007		P4		f
3978	3997	complement	P0		r
3978	3997	complement	P1		r
3978	3997	complement	P4		r
4030	4049		P0		f
4030	4049		P1		f
4020	4039	complement	P1		r
4054	4073		P0		f
4054	4073		P1		f
4043	4062	complement	P1		r
4044	4063	complement	P0		r
4087	4106		P0		f
4087	4106		P1		f
4087	4106		P4		f
4088	4107		P4		f
4093	4112		P0		f
4093	4112		P1		f
4093	4112		P4		f
4094	4113		P0		f
4094	4113		P4		f
4077	4096	complement	P1		r
4077	4096	complement	P4		r
4078	4097	complement	P0		r
4078	4097	complement	P4		r
4083	4102	complement	P0		r
4083	4102	complement	P1		r
4083	4102	complement	P4		r
4103	4122		P0		f
4103	4122		P1		f
4103	4122		P4		f
4084	4103	complement	P0		r
4084	4103	complement	P1		r
4093	4112	complement	P0		r
4093	4112	complement	P1		r
4093	4112	complement	P4		r
4119	4138		P1		f
4109	4128	complement	P0		r
4109	4128	complement	P1		r
4185	4204		P0		f
4185	4204		P1		f
4175	4194	complement	P0		r
4175	4194	complement	P1		r
4175	4194	complement	P4		r
4209	4228	complement	P0		r
4245	4264		P0		f
4245	4264		P1		f
4245	4264		P4		f
4247	4266		P0		f
4247	4266		P1		f
4247	4266		P4		f
4250	4269		P0		f
4250	4269		P1		f
4250	4269		P4		f
4252	4271		P0		f
4252	4271		P4		f
4235	4254	complement	P0		r
4235	4254	complement	P1		r
4235	4254	complement	P4		r
4237	4256	complement	P1		r
4237	4256	complement	P4		r
4238	4257	complement	P0		r
4240	4259	complement	P0		r
4240	4259	complement	P1		r
4240	4259	complement	P4		r
4242	4261	complement	P0		r
4242	4261	complement	P1		r
4242	4261	complement	P4		r
4263	4282		P0		f
4263	4282		P1		f
4263	4282		P4		f
4268	4287		P0		f
4253	4272	complement	P0		r
4253	4272	complement	P1		r
4253	4272	complement	P4		r
4258	4277	complement	P0		r
4326	4345		P4		f
4339	4358		P0		f
4327	4346	complement	P0		r
4359	4378		P0		f
4359	4378		P1		f
4359	4378		P4		f
4365	4384		P0		f
4365	4384		P1		f
4365	4384		P4		f
4349	4368	complement	P0		r
4349	4368	complement	P1		r
4349	4368	complement	P4		r
4375	4394		P1		f
4383	4402		P1		f
4383	4402		P4		f
4365	4384	complement	P1		r
4393	4412		P0		f
4374	4393	complement	P0		r
4374	4393	complement	P1		r
4374	4393	complement	P4		r
4406	4425	complement	P0		r
4457	4476		P1		f
4447	4466	complement	P1		r
4447	4466	complement	P4		r
4472	4491		P0		f
4478	4497		P0		f
4478	4497		P1		f
4478	4497		P4		f
4462	4481	complement	P0		r
4462	4481	complement	P1		r
4462	4481	complement	P4		r
4484	4503		P4		f
4468	4487	complement	P0		r
4468	4487	complement	P1		r
4468	4487	complement	P4		r
4491	4510		P0		f
4491	4510		P1		f
4491	4510		P4		f
4481	4500	complement	P1		r
4501	4520		P0		f
4501	4520		P1		f
4501	4520		P4		f
4491	4510	complement	P1		r
4566	4585		P0		f
4566	4585		P4		f
4569	4588		P0		f
4569	4588		P4		f
4556	4575	complement	P0		r
4556	4575	complement	P4		r
4559	4578	complement	P0		r
4559	4578	complement	P1		r
4559	4578	complement	P4		r
4581	4600		P4		f
4589	4608		P0		f
4589	4608		P1		f
4596	4615		P0		f
4597	4616		P0		f
4597	4616		P1		f
4579	4598	complement	P0		r
4601	4620		P0		f
4601	4620		P1		f
4586	4605	complement	P0		r
4586	4605	complement	P1		r
4629	4648		P0		f
4629	4648		P1		f
4629	4648		P4		f
4619	4638	complement	P0		r
4619	4638	complement	P1		r
4619	4638	complement	P4		r
4641	4660		P1		f
4647	4666		P0		f
4637	4656	complement	P0		r
4669	4688		P0		f
4669	4688		P1		f
4669	4688		P4		f
4659	4678	complement	P0		r
4659	4678	complement	P1		r
4659	4678	complement	P4		r
4683	4702		P0		f
4684	4703		P0		f
4684	4703		P1		f
4684	4703		P4		f
4673	4692	complement	P0		r
4674	4693	complement	P0		r
4696	4715		P0		f
4696	4715		P1		f
4678	4697	complement	P0		r
4682	4701	complement	P0		r
4686	4705	complement	P0		r
4686	4705	complement	P1		r
4743	4762		P0		f
4751	4770		P0		f
4751	4770		P1		f
4751	4770		P4		f
4733	4752	complement	P0		r
4741	4760	complement	P0		r
4741	4760	complement	P4		r
4784	4803		P0		f
4787	4806		P0		f
4774	4793	complement	P0		r
4794	4813		P0		f
4795	4814		P0		f
4795	4814		P1		f
4795	4814		P4		f
4796	4815		P0		f
4784	4803	complement	P0		r
4786	4805	complement	P0		r
4786	4805	complement	P1		r
4786	4805	complement	P4		r
4953	4972		P0		f
4953	4972		P1		f
4953	4972		P4		f
4954	4973		P0		f
4955	4974		P0		f
4960	4979		P1		f
4943	4962	complement	P0		r
4943	4962	complement	P1		r
4963	4982		P0		f
4950	4969	complement	P0		r
4950	4969	complement	P1		r
4953	4972	complement	P0		r
4985	5004		P0		f
4990	5009		P0		f
4990	5009		P1		f
4990	5009		P4		f
4975	4994	complement	P0		r
4998	5017		P0		f
4998	5017		P1		f
4998	5017		P4		f
5000	5019		P4		f
4988	5007	complement	P0		r
5012	5031		P0		f
5012	5031		P1		f
5012	5031		P4		f
5019	5038		P0		f
5019	5038		P4		f
5002	5021	complement	P0		r
5009	5028	complement	P0		r
5009	5028	complement	P4		r
5049	5068		P0		f
5049	5068		P1		f
5049	5068		P4		f
5039	5058	complement	P0		r
5039	5058	complement	P1		r
5039	5058	complement	P4		r
5091	5110		P0		f
5091	5110		P1		f
5091	5110		P4		f
5093	5112		P1		f
5093	5112		P4		f
5081	5100	complement	P0		r
5081	5100	complement	P1		r
5081	5100	complement	P4		r
5100	5119		P0		f
5100	5119		P1		f
5100	5119		P4		f
5083	5102	complement	P0		r
5083	5102	complement	P1		r
5083	5102	complement	P4		r
5090	5109	complement	P0		r
5090	5109	complement	P1		r
5090	5109	complement	P4		r
5098	5117	complement	P4		r
5104	5123	complement	P1		r
5125	5144		P0		f
5125	5144		P1		f
5125	5144		P4		f
5115	5134	complement	P1		r
5115	5134	complement	P4		r
5234	5253		P0		f
5262	5281		P0		f
5269	5288		P0		f
5269	5288		P1		f
5269	5288		P4		f
5259	5278	complement	P0		r
5259	5278	complement	P1		r
5318	5337		P0		f
5308	5327	complement	P0		r
5370	5389		P0		f
5370	5389		P1		f
5354	5373	complement	P1		r
5375	5394		P0		f
5375	5394		P1		f
5360	5379	complement	P1		r
5360	5379	complement	P4		r
5365	5384	complement	P0		r
5378	5397	complement	P0		r
5422	5441		P1		f
5422	5441		P4		f
5412	5431	complement	P0		r
5412	5431	complement	P1		r
5412	5431	complement	P4		r
5443	5462		P0		f
5443	5462		P1		f
5434	5453	complement	P1		r
5441	5460	complement	P0		r
5441	5460	complement	P1		r
5476	5495		P0		f
5476	5495		P1		f
5477	5496		P0		f
5466	5485	complement	P0		r
5466	5485	complement	P1		r
5483	5502	complement	P1		r
5503	5522		P0		f
5503	5522		P1		f
5493	5512	complement	P0		r
5556	5575		P0		f
5850	5869		P0		f
5840	5859	complement	P0		r
6354	6373		P0		f
6344	6363	complement	P0		r
6518	6537		P0		f
6533	6552		P0		f
6533	6552		P1		f
6523	6542	complement	P0		r
6645	6664		P0		f
6681	6700		P0		f
6769	6788	complement	P4		r
7000	7019	complement	P0		r
7287	7306		P0		f
7277	7296	complement	P0		r
7555	7574		P0		f
7545	7564	complement	P0		r
7698	7717		P0		f
7713	7732		P0		f
7718	7737		P0		f
7740	7759		P0		f
7740	7759		P1		f
7752	7771		P0		f
7835	7854		P0	duplicate	f
8186	8205	complement	P1		r
8422	8441		P0		f
8616	8635		P0		f
8606	8625	complement	P0		r
8864	8883		P0		f
9012	9031		P0		f
9002	9021	complement	P0		r
9109	9128	complement	P0		r
9155	9174	complement	P0		r
9188	9207		P0		f
9178	9197	complement	P0		r
9261	9280	complement	P0		r
9338	9357		P0		f
9328	9347	complement	P0		r
9562	9581	complement	P0		r
9595	9614	complement	P1		r
9811	9830		P0		f
9827	9846		P0		f
9886	9905		P0		f
9886	9905		P1		f
9886	9905		P4		f
9895	9914		P0		f
9876	9895	complement	P0		r
9876	9895	complement	P1		r
9876	9895	complement	P4		r
9933	9952		P0		f
9933	9952		P1		f
9933	9952		P4		f
9923	9942	complement	P0		r
9923	9942	complement	P1		r
9923	9942	complement	P4		r
10005	10024		P0		f
10013	10032		P0		f
9995	10014	complement	P0		r
10082	10101		P0		f
10072	10091	complement	P0		r
10299	10318		P0		f
10289	10308	complement	P0		r
10294	10313	complement	P0		r
10346	10365		P0		f
10374	10393		P0		f
10383	10402		P0		f
10373	10392	complement	P0		r
10402	10421	complement	P0		r
10517	10536		P0		f
10705	10724		P0		f
10716	10735		P0		f
10706	10725	complement	P0		r
10753	10772		P0		f
10836	10855		P0		f
10923	10942		P0		f
10913	10932	complement	P0		r
10978	10997		P0		f
10967	10986	complement	P0		r
10968	10987	complement	P0		r
10969	10988	complement	P0		r
11008	11027	complement	P0		r
11115	11134	complement	P0		r
11225	11244		P0		f
11265	11284	complement	P0		r
11438	11457	complement	P0		r
11523	11542	complement	P0		r
11592	11611	complement	P0		r
11773	11792		P0		f
11821	11840		P0		f
11829	11848		P0		f
11811	11830	complement	P0		r
12064	12083		P0		f
12054	12073	complement	P0		r
12129	12148		P0		f
12321	12340		P0		f
12311	12330	complement	P0		r
12419	12438		P0		f
12464	12483		P0		f
12527	12546	complement	P0		r
12612	12631		P0		f
12612	12631		P1		f
12642	12661	complement	P0		r
12699	12718		P0		f
12689	12708	complement	P0		r
12744	12763		P0		f
12732	12751	complement	P0		r
12734	12753	complement	P0		r
12957	12976		P0		f
12957	12976		P1		f
12947	12966	complement	P0		r
12972	12991	complement	P0		r
13028	13047		P1		f
13018	13037	complement	P0		r
13018	13037	complement	P1		r
13061	13080	complement	P0		r
13182	13201		P0		f
13197	13216		P0		f
13198	13217		P0		f
13239	13258		P0		f
13224	13243	complement	P0		r
13228	13247	complement	P0		r
13231	13250	complement	P0		r
13274	13293		P1		f
13275	13294		P0		f
13264	13283	complement	P0		r
13264	13283	complement	P1		r
13357	13376		P0		f
13521	13540		P1		f
13652	13671		P0		f
13685	13704		P0		f
13690	13709		P0		f
13675	13694	complement	P0		r
13680	13699	complement	P0		r
13687	13706	complement	P0		r
13775	13794	complement	P0		r
13878	13897	complement	P0		r
14048	14067	complement	P0		r
14133	14152	complement	P0		r
14162	14181		P0		f
14204	14223	complement	P0		r
14261	14280		P0		f
14250	14269	complement	P0		r
14251	14270	complement	P0		r
14393	14412		P0		f
14398	14417		P0		f
14400	14419		P0		f
14388	14407	complement	P0		r
14428	14447		P0		f
14435	14454		P0		f
14462	14481	complement	P0		r
14598	14617	complement	P0		r
14675	14694		P0		f
14719	14738		P0		f
14823	14842		P0		f
14928	14947		P0		f
14955	14974		P0		f
14945	14964	complement	P0		r
14985	15004		P0		f
15036	15055	complement	P0		r
15060	15079		P0		f
15050	15069	complement	P0		r
15142	15161		P0		f
15142	15161		P1		f
15142	15161		P4		f
15131	15150	complement	P4		r
15132	15151	complement	P0		r
15132	15151	complement	P1		r
15132	15151	complement	P4		r
15189	15208	complement	P0		r
15244	15263		P0		f
15234	15253	complement	P0		r
15273	15292		P0		f
15263	15282	complement	P0		r
15354	15373		P0		f
15345	15364	complement	P0		r
15436	15455	complement	P0		r
15540	15559		P0		f
15522	15541	complement	P0		r
15577	15596		P0		f
15587	15606		P0		f
15577	15596	complement	P0		r
15599	15618		P0		f
15665	15684	complement	P0		r
15670	15689	complement	P0		r
15705	15724		P0		f
15702	15721	complement	P0		r
15896	15915		P0		f
15886	15905	complement	P0		r
16119	16138		P0		f
16109	16128	complement	P0		r
16189	16208		P0		f
16189	16208	complement	P0		r
16224	16243		P0		f
16214	16233	complement	P0		r
16332	16351		P0		f
16332	16351		P4		f
16334	16353		P0		f
16321	16340	complement	P0		r
16321	16340	complement	P1		r
16321	16340	complement	P4		r
16327	16346	complement	P0		r
16386	16405		P0		f
16401	16420		P0		f
16403	16422		P1		f
16392	16411	complement	P0		r
16393	16412	complement	P0		r
16413	16432		P0		f
16403	16422	complement	P0		r
16431	16450		P0		f
16489	16508	complement	P0		r
16518	16537		P0		f
16508	16527	complement	P0		r
16643	16662	complement	P0		r
16669	16688	complement	P0		r
16858	16877		P1		f
16858	16877		P4		f
16848	16867	complement	P0		r
16848	16867	complement	P1		r
16848	16867	complement	P4		r
16902	16921		P0		f
16902	16921		P4		f
16892	16911	complement	P0		r
16892	16911	complement	P1		r
16892	16911	complement	P4		r
16973	16992		P1		f
16963	16982	complement	P0		r
16963	16982	complement	P1		r
16963	16982	complement	P4		r
16990	17009		P1		f
17486	17505		P0		f
17559	17578		P0		f
17594	17613	complement	P1		r
17680	17699		P0		f
17684	17703		P0		f
17804	17823	complement	P0		r
17884	17903	complement	P0		r
17979	17998		P1		f
18127	18146	complement	P0		r
18127	18146	complement	P1		r
18259	18278	complement	P0		r
18327	18346		P4		f
18354	18373	complement	P4		r
18423	18442	complement	P0		r
18535	18554	complement	P0		r
18535	18554	complement	P1		r
18569	18588		P1		f
18570	18589		P0		f
18570	18589		P1		f
18570	18589		P4		f
18559	18578	complement	P1		r
18560	18579	complement	P0		r
18560	18579	complement	P1		r
18560	18579	complement	P4		r
18580	18599		P0		f
18580	18599		P1		f
18580	18599		P4		f
18570	18589	complement	P0		r
18570	18589	complement	P1		r
18570	18589	complement	P4		r
18641	18660		P0		f
18641	18660		P1		f
18641	18660		P4		f
18631	18650	complement	P0		r
18631	18650	complement	P1		r
18631	18650	complement	P4		r
18675	18694		P0		f
18675	18694		P1		f
18665	18684	complement	P0		r
18704	18723		P0		f
18704	18723		P1		f
18704	18723		P4		f
18705	18724		P0		f
18705	18724		P1		f
18705	18724		P4		f
18707	18726		P0		f
18707	18726		P1		f
18707	18726		P4		f
18709	18728		P4		f
18710	18729		P1		f
18712	18731		P0		f
18712	18731		P1		f
18694	18713	complement	P0		r
18695	18714	complement	P0		r
18695	18714	complement	P1		r
18715	18734		P1		f
18697	18716	complement	P0		r	cloning
18697	18716	complement	P1		r	cloning
18697	18716	complement	P4		r	cloning
18717	18736		P1		f	cloning
18728	18747		P0		f	cloning
18728	18747		P1		f	cloning
18728	18747		P4		f	cloning
18736	18755		P0		f	cloning
18718	18737	complement	P0		r	cloning
18718	18737	complement	P1		r	cloning
18718	18737	complement	P4		r	cloning
18740	18759		P4		f	cloning
18741	18760		P0		f	cloning
18749	18768		P1		f	cloning
18731	18750	complement	P0		r	cloning
18731	18750	complement	P4		r	cloning
18752	18771		P0		f	cloning
18752	18771		P1		f	cloning
18752	18771		P4		f	cloning
18755	18774		P0		f	cloning
18755	18774		P1		f	cloning
18755	18774		P4		f	cloning
18742	18761	complement	P0		r	cloning
18762	18781		P4		f	cloning
18769	18788		P0		f	cloning
18771	18790		P0		f	cloning
18774	18793		P0		f	cloning
18774	18793		P1		f	cloning
18774	18793		P4		f	cloning
18776	18795		P0		f	cloning
18776	18795		P4		f	cloning
18783	18802		P1		f	cloning
18764	18783	complement	P0		r	cloning
18764	18783	complement	P1		r	cloning
18764	18783	complement	P4		r	cloning
18785	18804		P0		f	cloning
18785	18804		P1		f	cloning
18766	18785	complement	P0		r	cloning
18766	18785	complement	P4		r	cloning
18786	18805		P0		f	cloning
18786	18805		P1		f	cloning
18786	18805		P4		f	cloning
18793	18812		P4		f	cloning
18794	18813		P0		f	cloning
18794	18813		P1		f	cloning
18794	18813		P4		f	cloning
18775	18794	complement	P0		r	cloning
18795	18814		P1		f	cloning
18795	18814		P4		f	cloning
18776	18795	complement	P0		r	cloning
18776	18795	complement	P1		r	cloning
18776	18795	complement	P4		r	cloning
18802	18821		P0		f	cloning
18784	18803	complement	P0		r	cloning
18784	18803	complement	P1		r	cloning
18784	18803	complement	P4		r	cloning
18804	18823		P0		f	cloning
18804	18823		P1		f	cloning
18804	18823		P4		f	cloning
18806	18825		P4		f	cloning
18808	18827		P0		f	cloning
18808	18827		P1		f	cloning
18808	18827		P4		f	cloning
18810	18829		P0		f	cloning
18810	18829		P1		f	cloning
18810	18829		P4		f	cloning
18812	18831		P0		f	cloning
18812	18831		P1		f	cloning
18812	18831		P4		f	cloning
18794	18813	complement	P0		r	cloning
18817	18836		P0		f	cloning
18817	18836		P1		f	cloning
18817	18836		P4		f	cloning
18799	18818	complement	P0		r	cloning
18799	18818	complement	P4		r	cloning
18800	18819	complement	P0		r	cloning
18800	18819	complement	P1		r	cloning
18800	18819	complement	P4		r	cloning
18819	18838		P0		f	cloning
18819	18838		P1		f	cloning
18819	18838		P4		f	cloning
18802	18821	complement	P0		r	cloning
18802	18821	complement	P1		r	cloning
18802	18821	complement	P4		r	cloning
18807	18826	complement	P4		r	cloning
18827	18846		P0		f	cloning
18827	18846		P4		f	cloning
18809	18828	complement	P0		r	cloning
18809	18828	complement	P1		r	cloning
18809	18828	complement	P4		r	cloning
18815	18834	complement	P4		r	cloning
18840	18859		P0		f	cloning
18840	18859		P1		f	cloning
18840	18859		P4		f	cloning
18841	18860		P1		f	cloning
18841	18860		P4		f	cloning
18842	18861		P0		f	cloning
18842	18861		P1		f	cloning
18824	18843	complement	P0		r	cloning
18830	18849	complement	P0		r	cloning
18830	18849	complement	P1		r	cloning
18830	18849	complement	P4		r	cloning
18832	18851	complement	P0		r	cloning
18853	18872		P0		f	cloning
18855	18874		P0		f	cloning
18855	18874		P1		f	cloning
18855	18874		P4		f	cloning
18856	18875		P0		f	cloning
18856	18875		P4		f	cloning
18857	18876		P4		f	cloning
18843	18862	complement	P0		r	cloning
18844	18863	complement	P4		r	cloning
18863	18882		P0		f	cloning
18863	18882		P1		f	cloning
18863	18882		P4		f	cloning
18845	18864	complement	P0		r	cloning
18845	18864	complement	P1		r	cloning
18845	18864	complement	P4		r	cloning
18870	18889		P1		f	cloning
18870	18889		P4		f	cloning
18852	18871	complement	P4		r	cloning
18853	18872	complement	P0		r	cloning
18853	18872	complement	P1		r	cloning
18853	18872	complement	P4		r	cloning
18873	18892		P0		f	cloning
18873	18892		P1		f	cloning
18873	18892		P4		f	cloning
18857	18876	complement	P4		r	cloning
18880	18899		P0		f	cloning
18880	18899		P1		f	cloning
18880	18899		P4		f	cloning
18881	18900		P0		f	cloning
18881	18900		P1		f	cloning
18881	18900		P4		f	cloning
18863	18882	complement	P0		r	cloning
18863	18882	complement	P1		r	cloning
18863	18882	complement	P4		r	cloning
18889	18908		P4		f	cloning
18870	18889	complement	P4		r	cloning
18895	18914		P4		f	cloning
18897	18916		P4		f	cloning
18903	18922		P0		f	cloning
18903	18922		P1		f	cloning
18903	18922		P4		f	cloning
18905	18924		P0		f	cloning
18905	18924		P1		f	cloning
18905	18924		P4		f	cloning
18889	18908	complement	P4		r	cloning
18910	18929		P0		f	cloning
18910	18929		P1		f	cloning
18910	18929		P4		f	cloning
18893	18912	complement	P0		r	cloning
18893	18912	complement	P1		r	cloning
18893	18912	complement	P4		r	cloning
18895	18914	complement	P0		r	cloning
18895	18914	complement	P1		r	cloning
18895	18914	complement	P4		r	cloning
18915	18934		P0		f	cloning
18916	18935		P0		f	cloning
18916	18935		P1		f	cloning
18916	18935		P4		f	cloning
18918	18937		P1		f	cloning
18918	18937		P4		f	cloning
18900	18919	complement	P0		r	cloning
18900	18919	complement	P1		r	cloning
18900	18919	complement	P4		r	cloning
18924	18943		P0		f	cloning
18906	18925	complement	P0		r	cloning
18906	18925	complement	P1		r	cloning
18906	18925	complement	P4		r	cloning
18908	18927	complement	P1		r	cloning
18912	18931	complement	P4		r	cloning
18913	18932	complement	P0		r	cloning
18913	18932	complement	P4		r	cloning
18914	18933	complement	P0		r	cloning
18914	18933	complement	P4		r	cloning
18934	18953		P4		f	cloning
18945	18964		P1		f	cloning
18945	18964		P4		f	cloning
18946	18965		P4		f	cloning
18936	18955	complement	P4		r	cloning
18956	18975		P0		f	cloning
18956	18975		P1		f	cloning
18956	18975		P4		f	cloning
18957	18976		P0		f	cloning
18957	18976		P1		f	cloning
18957	18976		P4		f	cloning
18964	18983		P4		f	cloning
18965	18984		P1		f	cloning
18946	18965	complement	P0		r	cloning
18946	18965	complement	P1		r	cloning
18946	18965	complement	P4		r	cloning
18947	18966	complement	P0		r	cloning
18947	18966	complement	P1		r	cloning
18947	18966	complement	P4		r	cloning
18967	18986		P0		f	cloning
18967	18986		P1		f	cloning
18967	18986		P4		f	cloning
18968	18987		P4		f	cloning
18952	18971	complement	P4		r	cloning
18974	18993		P0		f	cloning
18975	18994		P0		f	cloning
18975	18994		P1		f	cloning
18975	18994		P4		f	cloning
18976	18995		P0		f	cloning
18976	18995		P1		f	cloning
18976	18995		P4		f	cloning
18957	18976	complement	P0		r	cloning
18957	18976	complement	P1		r	cloning
18957	18976	complement	P4		r	cloning
18959	18978	complement	P4		r	cloning
18978	18997		P0		f	cloning
18978	18997		P1		f	cloning
18978	18997		P4		f	cloning
18960	18979	complement	P1		r	cloning
18965	18984	complement	P4		r	cloning
18966	18985	complement	P0		r	cloning
18966	18985	complement	P1		r	cloning
18966	18985	complement	P4		r	cloning
18967	18986	complement	P1		r	cloning
18968	18987	complement	P0		r	cloning
18968	18987	complement	P1		r	cloning
18968	18987	complement	P4		r	cloning
18987	19006		P0		f	cloning
18987	19006		P1		f	cloning
18970	18989	complement	P0		r	cloning
18989	19008		P4		f	cloning
18991	19010		P0		f	cloning
18991	19010		P1		f	cloning
18991	19010		P4		f	cloning
18976	18995	complement	P1		r	cloning
18976	18995	complement	P4		r	cloning
18996	19015		P0		f	cloning
18996	19015		P1		f	cloning
18997	19016		P1		f	cloning
18997	19016		P4		f	cloning
18981	19000	complement	P0		r	cloning
18981	19000	complement	P1		r	cloning
18981	19000	complement	P4		r	cloning
19003	19022		P0		f	cloning
19003	19022		P1		f	cloning
18986	19005	complement	P0		r	cloning
18988	19007	complement	P0		r	cloning
18988	19007	complement	P1		r	cloning
18988	19007	complement	P4		r	cloning
19010	19029		P0		f	cloning
19011	19030		P0		f	cloning
19011	19030		P1		f	cloning
19011	19030		P4		f	cloning
18993	19012	complement	P1		r	cloning
19012	19031		P1		f	cloning
19012	19031		P4		f	cloning
19016	19035		P4		f	cloning
19018	19037		P4		f	cloning
19000	19019	complement	P4		r	cloning
19001	19020	complement	P1		r	cloning
19001	19020	complement	P4		r	cloning
19002	19021	complement	P0		r	cloning
19002	19021	complement	P1		r	cloning
19002	19021	complement	P4		r	cloning
19022	19041		P4		f	cloning
19024	19043		P4		f	cloning
19007	19026	complement	P4		r	cloning
19008	19027	complement	P4		r	cloning
19030	19049		P0		f	cloning
19032	19051		P0		f	cloning
19032	19051		P1		f	cloning
19032	19051		P4		f	cloning
19033	19052		P4		f	cloning
19037	19056		P1		f	cloning
19038	19057		P4		f	cloning
19020	19039	complement	P0		r	cloning
19040	19059		P0		f	cloning
19040	19059		P1		f	cloning
19040	19059		P4		f	cloning
19022	19041	complement	P0		r	cloning
19022	19041	complement	P4		r	cloning
19030	19049	complement	P0		r	cloning
19030	19049	complement	P1		r	cloning
19030	19049	complement	P4		r	cloning
19049	19068		P0		f	cloning
19049	19068		P1		f	cloning
19049	19068		P4		f	cloning
19050	19069		P0		f	cloning
19050	19069		P1		f	cloning
19050	19069		P4		f	cloning
19051	19070		P0		f	cloning
19051	19070		P1		f	cloning
19051	19070		P4		f	cloning
19052	19071		P1		f	cloning
19034	19053	complement	P4		r	cloning
19039	19058	complement	P0		r	cloning
19039	19058	complement	P1		r	cloning
19039	19058	complement	P4		r	cloning
19040	19059	complement	P0		r	cloning
19040	19059	complement	P1		r	cloning
19040	19059	complement	P4		r	cloning
19041	19060	complement	P0		r	cloning
19041	19060	complement	P1		r	cloning
19041	19060	complement	P4		r	cloning
19062	19081		P1		f	cloning
19047	19066	complement	P0		r	cloning
19071	19090		P4		f	cloning
19052	19071	complement	P0		r	cloning
19052	19071	complement	P4		r	cloning
19053	19072	complement	P0		r	cloning
19053	19072	complement	P1		r	cloning
19075	19094		P0		f	cloning
19075	19094		P1		f	cloning
19075	19094		P4		f	cloning
19065	19084	complement	P0		r	cloning
19065	19084	complement	P1		r	cloning
19065	19084	complement	P4		r	cloning
19085	19104		P0		f	cloning
19085	19104		P1		f	cloning
19085	19104		P4		f	cloning
19070	19089	complement	P0		r	cloning
19070	19089	complement	P1		r	cloning
19093	19112		P0		f	cloning
19093	19112		P1		f	cloning
19093	19112		P4		f	cloning
19075	19094	complement	P0		r	cloning
19075	19094	complement	P1		r	cloning
19075	19094	complement	P4		r	cloning
19094	19113		P4		f	cloning
19076	19095	complement	P4		r	cloning
19095	19114		P0		f	cloning
19095	19114		P1		f	cloning
19095	19114		P4		f	cloning
19097	19116		P0		f	cloning
19100	19119		P4		f	cloning
19082	19101	complement	P4		r	cloning
19101	19120		P0		f	cloning
19083	19102	complement	P0		r	cloning
19083	19102	complement	P1		r	cloning
19083	19102	complement	P4		r	cloning
19102	19121		P0		f	cloning
19102	19121		P1		f	cloning
19102	19121		P4		f	cloning
19084	19103	complement	P1		r	cloning
19103	19122		P0		f	cloning
19103	19122		P1		f	cloning
19085	19104	complement	P0		r	cloning
19085	19104	complement	P1		r	cloning
19085	19104	complement	P4		r	cloning
19104	19123		P0		f	cloning
19087	19106	complement	P0		r	cloning
19108	19127		P0		f	cloning
19090	19109	complement	P0		r	cloning
19110	19129		P0		f	cloning
19092	19111	complement	P0		r	cloning
19092	19111	complement	P1		r	cloning
19092	19111	complement	P4		r	cloning
19093	19112	complement	P0		r	cloning
19093	19112	complement	P1		r	cloning
19093	19112	complement	P4		r	cloning
19094	19113	complement	P1		r	cloning
19115	19134		P1		f	cloning
19118	19137		P0		f	cloning
19118	19137		P1		f	cloning
19118	19137		P4		f	cloning
19100	19119	complement	P0		r	cloning
19120	19139		P0		f	cloning
19120	19139		P1		f	cloning
19102	19121	complement	P1		r	cloning
19126	19145		P0		f	cloning
19108	19127	complement	P0		r	cloning
19108	19127	complement	P1		r	cloning
19108	19127	complement	P4		r	cloning
19127	19146		P1		f	cloning
19127	19146		P4		f	cloning
19128	19147		P0		f	cloning
19110	19129	complement	P0		r	cloning
19110	19129	complement	P1		r	cloning
19130	19149		P0		f	cloning
19130	19149		P4		f	cloning
19113	19132	complement	P1		r	cloning
19117	19136	complement	P4		r	cloning
19137	19156		P0		f	cloning
19137	19156		P1		f	cloning
19137	19156		P4		f	cloning
19118	19137	complement	P0		r	cloning
19120	19139	complement	P0		r	cloning
19120	19139	complement	P1		r	cloning
19120	19139	complement	P4		r	cloning
19145	19164		P0		f	cloning
19145	19164		P1		f	cloning
19145	19164		P4		f	cloning
19127	19146	complement	P0		r	cloning
19127	19146	complement	P1		r	cloning
19127	19146	complement	P4		r	cloning
19134	19153	complement	P0		r	cloning
19134	19153	complement	P1		r	cloning
19134	19153	complement	P4		r	cloning
19135	19154	complement	P1		r	cloning
19135	19154	complement	P4		r	cloning
19156	19175		P0		f	cloning
19157	19176		P4		f	cloning
19138	19157	complement	P4		r	cloning
19142	19161	complement	P1		r	cloning
19163	19182		P1		f	cloning
19163	19182		P4		f	cloning
19144	19163	complement	P1		r	cloning
19146	19165	complement	P0		r	cloning
19146	19165	complement	P1		r	cloning
19146	19165	complement	P4		r	cloning
19153	19172	complement	P0		r	cloning
19153	19172	complement	P1		r	cloning
19153	19172	complement	P4		r	cloning
19173	19192		P0		f	cloning
19173	19192		P1		f	cloning
19173	19192		P4		f	cloning
19175	19194		P0		f	cloning
19175	19194		P1		f	cloning
19176	19195		P1		f	cloning
19178	19197		P0		f	cloning
19179	19198		P0		f	cloning
19179	19198		P1		f	cloning
19179	19198		P4		f	cloning
19181	19200		P0		f	cloning
19181	19200		P1		f	cloning
19181	19200		P4		f	cloning
19163	19182	complement	P0		r	cloning
19163	19182	complement	P1		r	cloning
19163	19182	complement	P4		r	cloning
19164	19183	complement	P1		r	cloning
19165	19184	complement	P1		r	cloning
19168	19187	complement	P1		r	cloning
19169	19188	complement	P0		r	cloning
19169	19188	complement	P1		r	cloning
19169	19188	complement	P4		r	cloning
19189	19208		P0		f	cloning
19189	19208		P1		f	cloning
19171	19190	complement	P0		r	cloning
19171	19190	complement	P1		r	cloning
19171	19190	complement	P4		r	cloning
19174	19193	complement	P4		r	cloning
19197	19216		P0		f	cloning
19197	19216		P1		f	cloning
19198	19217		P0		f	cloning
19198	19217		P1		f	cloning
19198	19217		P4		f	cloning
19179	19198	complement	P0		r	cloning
19180	19199	complement	P0		r	cloning
19180	19199	complement	P4		r	cloning
19200	19219		P0		f	cloning
19200	19219		P1		f	cloning
19181	19200	complement	P4		r	cloning
19202	19221		P0		f	cloning
19205	19224		P0		f	cloning
19187	19206	complement	P0		r	cloning
19187	19206	complement	P1		r	cloning
19187	19206	complement	P4		r	cloning
19188	19207	complement	P0		r	cloning
19188	19207	complement	P1		r	cloning
19188	19207	complement	P4		r	cloning
19208	19227		P0		f	cloning
19208	19227		P1		f	cloning
19208	19227		P4		f	cloning
19190	19209	complement	P0		r	cloning
19190	19209	complement	P1		r	cloning
19192	19211	complement	P0		r	cloning
19192	19211	complement	P4		r	cloning
19198	19217	complement	P0		r	cloning
19198	19217	complement	P1		r	cloning
19200	19219	complement	P0		r	cloning
19232	19251		P0		f	cloning
19232	19251		P1		f	cloning
19232	19251		P4		f	cloning
19234	19253		P4		f	cloning
19218	19237	complement	P4		r	cloning
19237	19256		P0		f	cloning
19237	19256		P1		f	cloning
19237	19256		P4		f	cloning
19220	19239	complement	P4		r	cloning
19221	19240	complement	P1		r	cloning
19221	19240	complement	P4		r	cloning
19222	19241	complement	P0		r	cloning
19222	19241	complement	P1		r	cloning
19222	19241	complement	P4		r	cloning
19242	19261		P0		f	cloning
19242	19261		P1		f	cloning
19242	19261		P4		f	cloning
19243	19262		P4		f	cloning
19226	19245	complement	P0		r	cloning
19227	19246	complement	P0		r	cloning
19227	19246	complement	P1		r	cloning
19227	19246	complement	P4		r	cloning
19247	19266		P0		f	cloning
19247	19266		P1		f	cloning
19247	19266		P4		f	cloning
19248	19267		P0		f	cloning
19248	19267		P1		f	cloning
19230	19249	complement	P0		r	cloning
19232	19251	complement	P0		r	cloning
19232	19251	complement	P1		r	cloning
19232	19251	complement	P4		r	cloning
19235	19254	complement	P1		r	cloning
19236	19255	complement	P1		r	cloning
19237	19256	complement	P0		r	cloning
19237	19256	complement	P1		r	cloning
19237	19256	complement	P4		r	cloning
19238	19257	complement	P4		r	cloning
19260	19279		P4		f	cloning
19261	19280		P0		f	cloning
19261	19280		P1		f	cloning
19261	19280		P4		f	cloning
19242	19261	complement	P4		r	cloning
19244	19263	complement	P1		r	cloning
19251	19270	complement	P0		r	cloning
19251	19270	complement	P1		r	cloning
19251	19270	complement	P4		r	cloning
19274	19293		P4		f	cloning
19277	19296		P0		f	cloning
19277	19296		P4		f	cloning
19284	19303		P0		f	cloning
19284	19303		P4		f	cloning
19266	19285	complement	P4		r	cloning
19285	19304		P0		f	cloning
19285	19304		P1		f	cloning
19285	19304		P4		f	cloning
19267	19286	complement	P0		r	cloning
19267	19286	complement	P4		r	cloning
19274	19293	complement	P0		r	cloning
19274	19293	complement	P1		r	cloning
19274	19293	complement	P4		r	cloning
19275	19294	complement	P0		r	cloning
19275	19294	complement	P1		r	cloning
19275	19294	complement	P4		r	cloning
19296	19315		P0		f	cloning
19279	19298	complement	P1		r	cloning
19298	19317		P0		f	cloning
19298	19317		P1		f	cloning
19283	19302	complement	P0		r	cloning
19283	19302	complement	P1		r	cloning
19304	19323		P0		f	cloning
19304	19323		P1		f	cloning
19304	19323		P4		f	cloning
19305	19324		P0		f	cloning
19305	19324		P1		f	cloning
19305	19324		P4		f	cloning
19286	19305	complement	P0		r	cloning
19286	19305	complement	P4		r	cloning
19287	19306	complement	P4		r	cloning
19288	19307	complement	P0		r	cloning
19295	19314	complement	P0		r	cloning
19295	19314	complement	P1		r	cloning
19295	19314	complement	P4		r	cloning
19296	19315	complement	P4		r	cloning
19306	19325	complement	P4		r	cloning
19334	19353		P0		f	cloning
19328	19347	complement	P1		r	cloning
19331	19350	complement	P4		r	cloning
19353	19372		P0		f	cloning
19354	19373		P0		f	cloning
19341	19360	complement	P1		r	cloning
19361	19380		P0		f	cloning
19361	19380		P1		f	cloning
19361	19380		P4		f	cloning
19343	19362	complement	P0		r	cloning
19343	19362	complement	P4		r	cloning
19344	19363	complement	P0		r	cloning
19344	19363	complement	P1		r	cloning
19345	19364	complement	P4		r	cloning
19347	19366	complement	P4		r	cloning
19368	19387		P0		f	cloning
19351	19370	complement	P0		r	cloning
19351	19370	complement	P1		r	cloning
19351	19370	complement	P4		r	cloning
19353	19372	complement	P0		r	cloning
19373	19392		P0		f	cloning
19373	19392		P1		f	cloning
19373	19392		P4		f	cloning
19376	19395		P0		f	cloning
19376	19395		P1		f	cloning
19376	19395		P4		f	cloning
19358	19377	complement	P0		r	cloning
19358	19377	complement	P4		r	cloning
19380	19399		P0		f
19380	19399		P4		f
19363	19382	complement	P0		r
19363	19382	complement	P1		r
19363	19382	complement	P4		r
19366	19385	complement	P0		r
19366	19385	complement	P1		r
19366	19385	complement	P4		r
19387	19406		P0		f
19387	19406		P1		f
19387	19406		P4		f
19370	19389	complement	P0		r
19370	19389	complement	P4		r
19391	19410		P0		f
19391	19410		P1		f
19391	19410		P4		f
19377	19396	complement	P0		r
19377	19396	complement	P1		r
19377	19396	complement	P4		r
19380	19399	complement	P4		r
19381	19400	complement	P0		r
19381	19400	complement	P1		r
19381	19400	complement	P4		r
19391	19410	complement	P1		r
19391	19410	complement	P4		r
19396	19415	complement	P0		r
19413	19432	complement	P0		r
19415	19434	complement	P4		r
19438	19457		P0		f
19438	19457		P1		f
19438	19457		P4		f
19428	19447	complement	P0		r
19428	19447	complement	P1		r
19428	19447	complement	P4		r
19448	19467		P0		f
19429	19448	complement	P4		r
19450	19469		P0		f
19450	19469		P1		f
19450	19469		P4		f
19455	19474		P4		f
19438	19457	complement	P0		r
19440	19459	complement	P0		r
19440	19459	complement	P1		r
19440	19459	complement	P4		r
19462	19481		P1		f
19462	19481		P4		f
19464	19483		P0		f
19464	19483		P1		f
19464	19483		P4		f
19466	19485		P0		f
19466	19485		P1		f
19466	19485		P4		f
19467	19486		P0		f
19452	19471	complement	P0		r
19452	19471	complement	P1		r
19452	19471	complement	P4		r
19454	19473	complement	P0		r
19454	19473	complement	P1		r
19454	19473	complement	P4		r
19455	19474	complement	P0		r
19456	19475	complement	P0		r
19456	19475	complement	P4		r
19461	19480	complement	P1		r
19479	19498	complement	P1		r
19498	19517		P0		f
19498	19517		P1		f
19488	19507	complement	P0		r
19547	19566		P4		f
19550	19569		P0		f
19540	19559	complement	P0		r
19540	19559	complement	P1		r
19547	19566	complement	P0		r
19547	19566	complement	P1		r
19547	19566	complement	P4		r
19566	19585		P0		f
19566	19585		P1		f
19566	19585		P4		f
19568	19587		P0		f
19568	19587		P4		f
19569	19588		P0		f
19569	19588		P1		f
19569	19588		P4		f
19552	19571	complement	P4		r
19574	19593		P0		f
19574	19593		P1		f
19556	19575	complement	P0		r
19556	19575	complement	P4		r
19575	19594		P0		f
19575	19594		P1		f
19575	19594		P4		f
19558	19577	complement	P0		r
19558	19577	complement	P1		r
19559	19578	complement	P0		r
19559	19578	complement	P4		r
19563	19582	complement	P4		r
19564	19583	complement	P0		r
19565	19584	complement	P0		r
19565	19584	complement	P1		r
19565	19584	complement	P4		r
19592	19611		P1		f
19592	19611		P4		f
19582	19601	complement	P0		r
19582	19601	complement	P1		r
19582	19601	complement	P4		r
19590	19609	complement	P0		r
19623	19642		P4		f
19624	19643		P0		f
19624	19643		P1		f
19624	19643		P4		f
19611	19630	complement	P0		r
19613	19632	complement	P4		r
19614	19633	complement	P0		r
19614	19633	complement	P1		r
19614	19633	complement	P4		r
19634	19653		P0		f
19624	19643	complement	P0		r
19628	19647	complement	P4		r
19686	19705		P0		f
19686	19705		P1		f
19686	19705		P4		f
19687	19706		P0		f
19687	19706		P1		f
19687	19706		P4		f
19688	19707		P0		f
19688	19707		P1		f
19688	19707		P4		f
19695	19714		P4		f
19676	19695	complement	P0		r
19676	19695	complement	P1		r
19676	19695	complement	P4		r
19696	19715		P0		f
19696	19715		P1		f
19696	19715		P4		f
19678	19697	complement	P0		r
19678	19697	complement	P1		r
19678	19697	complement	P4		r
19686	19705	complement	P4		r
19707	19726		P4		f
19754	19773		P0		f
19754	19773		P1		f
19736	19755	complement	P0		r
19755	19774	complement	P0		r
19755	19774	complement	P1		r
19755	19774	complement	P4		r
19787	19806		P0		f
19787	19806		P1		f
19787	19806		P4		f
19788	19807		P0		f
19777	19796	complement	P0		r
19777	19796	complement	P1		r
19777	19796	complement	P4		r
19778	19797	complement	P0		r
19798	19817		P0		f
19798	19817		P1		f
19798	19817		P4		f
19802	19821		P0		f
19802	19821		P1		f
19788	19807	complement	P0		r
19788	19807	complement	P1		r
19788	19807	complement	P4		r
19803	19822	complement	P4		r
19840	19859		P0		f
19840	19859		P4		f
19845	19864		P0		f
19848	19867		P0		f
19830	19849	complement	P0		r
19830	19849	complement	P1		r
19830	19849	complement	P4		r
19853	19872		P0		f
19853	19872		P1		f
19855	19874		P0		f
19855	19874		P1		f
19855	19874		P4		f
19838	19857	complement	P0		r
19860	19879		P0		f
19860	19879		P1		f
19843	19862	complement	P1		r
19843	19862	complement	P4		r
19845	19864	complement	P0		r
19845	19864	complement	P1		r
19845	19864	complement	P4		r
19865	19884		P0		f
19848	19867	complement	P4		r
19869	19888		P4		f
19850	19869	complement	P1		r
19855	19874	complement	P0		r
19859	19878	complement	P0		r
19859	19878	complement	P1		r
19859	19878	complement	P4		r
19863	19882	complement	P4		r
19884	19903		P0		f
19888	19907		P0		f
19874	19893	complement	P0		r
19874	19893	complement	P1		r
19874	19893	complement	P4		r
19880	19899	complement	P0		r
19883	19902	complement	P0		r
19907	19926		P0		f
19913	19932		P1		f
19913	19932		P4		f
19897	19916	complement	P0		r
19904	19923	complement	P0		r
19904	19923	complement	P1		r
19904	19923	complement	P4		r
19940	19959		P0		f
19940	19959		P1		f
19940	19959		P4		f
19941	19960		P0		f
19941	19960		P1		f
19941	19960		P4		f
19948	19967		P0		f
19930	19949	complement	P0		r
19930	19949	complement	P1		r
19930	19949	complement	P4		r
19931	19950	complement	P0		r
19931	19950	complement	P1		r
19931	19950	complement	P4		r
19950	19969		P0		f
19950	19969		P1		f
19950	19969		P4		f
19938	19957	complement	P0		r
19938	19957	complement	P1		r
19938	19957	complement	P4		r
19941	19960	complement	P0		r
19941	19960	complement	P1		r
19941	19960	complement	P4		r
20070	20089		P0		f
20060	20079	complement	P0		r
20060	20079	complement	P4		r
20089	20108		P1		f
20089	20108		P4		f
20076	20095	complement	P1		r
20079	20098	complement	P0		r
20079	20098	complement	P1		r
20079	20098	complement	P4		r
20085	20104	complement	P4		r
20117	20136		P1		f
20117	20136		P4		f
20151	20170		P4		f
20190	20209		P0		f
20190	20209		P4		f
20180	20199	complement	P4		r
20230	20249		P0		f
20230	20249		P1		f
20230	20249		P4		f
20220	20239	complement	P0		r
20220	20239	complement	P1		r
20220	20239	complement	P4		r
20254	20273		P0		f
20244	20263	complement	P0		r
20264	20283		P0		f
20264	20283		P1		f
20264	20283		P4		f
20254	20273	complement	P0		r
20254	20273	complement	P1		r
20254	20273	complement	P4		r
20274	20293		P0		f
20275	20294		P4		f
20276	20295		P4		f
20264	20283	complement	P0		r
20284	20303		P4		f
20265	20284	complement	P4		r
20323	20342		P0		f
20323	20342		P1		f
20323	20342		P4		f
20313	20332	complement	P1		r
20313	20332	complement	P4		r
20364	20383		P0		f
20364	20383		P1		f
20364	20383		P4		f
20366	20385		P0		f
20366	20385		P1		f
20366	20385		P4		f
20354	20373	complement	P0		r
20354	20373	complement	P4		r
20375	20394		P4		f
20356	20375	complement	P0		r
20356	20375	complement	P1		r
20356	20375	complement	P4		r
20384	20403		P0		f
20384	20403		P1		f
20384	20403		P4		f
20374	20393	complement	P0		r
20374	20393	complement	P4		r
20393	20412		P0		f
20393	20412		P1		f
20393	20412		P4		f
20383	20402	complement	P0		r
20383	20402	complement	P1		r
20383	20402	complement	P4		r
20402	20421		P0		f
20403	20422		P4		f
20404	20423		P4		f
20421	20440		P1		f	cloning
20428	20447		P0		f	cloning
20428	20447		P4		f	cloning
20418	20437	complement	P0		r	cloning
20442	20461		P1		f	cloning
20443	20462		P1		f	cloning
20447	20466		P0		f	cloning
20447	20466		P1		f	cloning
20447	20466		P4		f	cloning
20437	20456	complement	P0		r	cloning
20457	20476		P4		f	cloning
20458	20477		P4		f	cloning
20461	20480		P0		f	cloning
20461	20480		P1		f	cloning
20461	20480		P4		f	cloning
20447	20466	complement	P4		r	cloning
20451	20470	complement	P4		r	cloning
20476	20495		P4		f	cloning
20457	20476	complement	P0		r	cloning
20479	20498		P0		f	cloning
20479	20498		P1		f	cloning
20479	20498		P4		f	cloning
20480	20499		P4		f	cloning
20484	20503		P0		f	cloning
20484	20503		P1		f	cloning
20484	20503		P4		f	cloning
20486	20505		P0		f	cloning
20469	20488	complement	P0		r	cloning
20469	20488	complement	P4		r	cloning
20491	20510		P4		f	cloning
20474	20493	complement	P0		r	cloning
20474	20493	complement	P1		r	cloning
20474	20493	complement	P4		r	cloning
20494	20513		P4		f	cloning
20476	20495	complement	P0		r	cloning
20500	20519		P4		f	cloning
20502	20521		P4		f	cloning
20508	20527		P0		f	cloning
20508	20527		P1		f	cloning
20508	20527		P4		f	cloning
20509	20528		P4		f	cloning
20510	20529		P1		f	cloning
20510	20529		P4		f	cloning
20498	20517	complement	P0		r	cloning
20498	20517	complement	P1		r	cloning
20498	20517	complement	P4		r	cloning
20518	20537		P0		f	cloning
20518	20537		P4		f	cloning
20519	20538		P4		f	cloning
20500	20519	complement	P0		r	cloning
20500	20519	complement	P1		r	cloning
20500	20519	complement	P4		r	cloning
20520	20539		P1		f	cloning
20523	20542		P0		f	cloning
20525	20544		P0		f	cloning
20506	20525	complement	P4		r	cloning
20527	20546		P0		f	cloning
20527	20546		P4		f	cloning
20508	20527	complement	P0		r	cloning
20508	20527	complement	P1		r	cloning
20508	20527	complement	P4		r	cloning
20529	20548		P0		f	cloning
20529	20548		P1		f	cloning
20529	20548		P4		f	cloning
20530	20549		P0		f	cloning
20530	20549		P4		f	cloning
20534	20553		P4		f	cloning
20517	20536	complement	P0		r	cloning
20517	20536	complement	P4		r	cloning
20538	20557		P4		f	cloning
20519	20538	complement	P0		r	cloning
20519	20538	complement	P1		r	cloning
20519	20538	complement	P4		r	cloning
20520	20539	complement	P0		r	cloning
20540	20559		P0		f	cloning
20540	20559		P1		f	cloning
20540	20559		P4		f	cloning
20541	20560		P4		f	cloning
20523	20542	complement	P4		r	cloning
20543	20562		P1		f	cloning
20543	20562		P4		f	cloning
20525	20544	complement	P4		r	cloning
20544	20563		P0		f	cloning
20544	20563		P4		f	cloning
20530	20549	complement	P0		r	cloning
20530	20549	complement	P1		r	cloning
20530	20549	complement	P4		r	cloning
20533	20552	complement	P1		r	cloning
20533	20552	complement	P4		r	cloning
20553	20572		P4		f	cloning
20564	20583		P0		f	cloning
20564	20583		P4		f	cloning
20568	20587		P1		f	cloning
20572	20591		P0		f	cloning
20572	20591		P1		f	cloning
20572	20591		P4		f	cloning
20560	20579	complement	P4		r	cloning
20562	20581	complement	P0		r	cloning
20562	20581	complement	P1		r	cloning
20562	20581	complement	P4		r	cloning
20589	20608		P0		f	cloning
20589	20608		P1		f	cloning
20589	20608		P4		f	cloning
20570	20589	complement	P0		r	cloning
20590	20609		P1		f	cloning
20590	20609		P4		f	cloning
20575	20594	complement	P0		r	cloning
20596	20615		P0		f	cloning
20596	20615		P4		f	cloning
20597	20616		P4		f	cloning
20578	20597	complement	P4		r	cloning
20579	20598	complement	P0		r	cloning
20579	20598	complement	P1		r	cloning
20579	20598	complement	P4		r	cloning
20580	20599	complement	P4		r	cloning
20599	20618		P0		f	cloning
20586	20605	complement	P0		r	cloning
20586	20605	complement	P4		r	cloning
20607	20626		P4		f	cloning
20614	20633		P0		f	cloning
20614	20633		P4		f	cloning
20619	20638		P0		f	cloning
20620	20639		P4		f	cloning
20621	20640		P0		f	cloning
20621	20640		P1		f	cloning
20621	20640		P4		f	cloning
20622	20641		P0		f	cloning
20622	20641		P1		f	cloning
20622	20641		P4		f	cloning
20604	20623	complement	P0		r	cloning
20604	20623	complement	P4		r	cloning
20627	20646		P0		f	cloning
20627	20646		P4		f	cloning
20629	20648		P4		f	cloning
20611	20630	complement	P0		r	cloning
20611	20630	complement	P1		r	cloning
20611	20630	complement	P4		r	cloning
20633	20652		P0		f	cloning
20633	20652		P1		f	cloning
20633	20652		P4		f	cloning
20635	20654		P4		f	cloning
20617	20636	complement	P1		r	cloning
20617	20636	complement	P4		r	cloning
20618	20637	complement	P0		r	cloning
20638	20657		P0		f	cloning
20638	20657		P1		f	cloning
20638	20657		P4		f	cloning
20621	20640	complement	P4		r	cloning
20622	20641	complement	P4		r	cloning
20623	20642	complement	P0		r	cloning
20623	20642	complement	P1		r	cloning
20623	20642	complement	P4		r	cloning
20644	20663		P4		f	cloning
20645	20664		P4		f	cloning
20627	20646	complement	P4		r	cloning
20647	20666		P4		f	cloning
20628	20647	complement	P0		r	cloning
20628	20647	complement	P1		r	cloning
20628	20647	complement	P4		r	cloning
20653	20672		P4		f	cloning
20662	20681		P4		f	cloning
20643	20662	complement	P4		r	cloning
20664	20683		P0		f	cloning
20664	20683		P1		f	cloning
20664	20683		P4		f	cloning
20665	20684		P0		f	cloning
20665	20684		P4		f	cloning
20646	20665	complement	P4		r	cloning
20666	20685		P0		f	cloning
20666	20685		P4		f	cloning
20667	20686		P0		f	cloning
20667	20686		P1		f	cloning
20667	20686		P4		f	cloning
20649	20668	complement	P1		r	cloning
20668	20687		P4		f	cloning
20654	20673	complement	P0		r	cloning
20654	20673	complement	P1		r	cloning
20654	20673	complement	P4		r	cloning
20656	20675	complement	P0		r	cloning
20656	20675	complement	P1		r	cloning
20656	20675	complement	P4		r	cloning
20675	20694		P0		f	cloning
20675	20694		P4		f	cloning
20657	20676	complement	P0		r	cloning
20657	20676	complement	P4		r	cloning
20664	20683	complement	P4		r	cloning
20665	20684	complement	P0		r	cloning
20665	20684	complement	P1		r	cloning
20665	20684	complement	P4		r	cloning
20685	20704		P0		f	cloning
20685	20704		P1		f	cloning
20685	20704		P4		f	cloning
20686	20705		P0		f	cloning
20686	20705		P4		f	cloning
20692	20711		P4		f	cloning
20675	20694	complement	P0		r	cloning
20675	20694	complement	P1		r	cloning
20675	20694	complement	P4		r	cloning
20695	20714		P0		f	cloning
20695	20714		P1		f	cloning
20695	20714		P4		f	cloning
20700	20719		P0		f	cloning
20700	20719		P4		f	cloning
20684	20703	complement	P4		r	cloning
20703	20722		P0		f	cloning
20685	20704	complement	P0		r	cloning
20685	20704	complement	P1		r	cloning
20685	20704	complement	P4		r	cloning
20705	20724		P0		f	cloning
20687	20706	complement	P4		r	cloning
20690	20709	complement	P0		r	cloning
20690	20709	complement	P4		r	cloning
20710	20729		P4		f	cloning
20693	20712	complement	P0		r	cloning
20693	20712	complement	P1		r	cloning
20694	20713	complement	P4		r	cloning
20695	20714	complement	P0		r	cloning
20716	20735		P4		f	cloning
20725	20744		P0		f	cloning
20712	20731	complement	P4		r	cloning
20733	20752		P0		f	cloning
20733	20752		P1		f	cloning
20740	20759		P0		f	cloning
20740	20759		P1		f	cloning
20723	20742	complement	P0		r	cloning
20723	20742	complement	P4		r	cloning
20745	20764		P4		f	cloning
20730	20749	complement	P0		r	cloning
20730	20749	complement	P1		r	cloning
20730	20749	complement	P4		r	cloning
20733	20752	complement	P4		r	cloning
20752	20771		P0		f	cloning
20752	20771		P1		f	cloning
20752	20771		P4		f	cloning
20735	20754	complement	P4		r	cloning
20758	20777		P4		f	cloning
20759	20778		P4		f	cloning
20741	20760	complement	P4		r	cloning
20742	20761	complement	P0		r	cloning
20742	20761	complement	P1		r	cloning
20742	20761	complement	P4		r	cloning
20764	20783		P4		f	cloning
20772	20791		P4		f	cloning
20754	20773	complement	P0		r	cloning
20754	20773	complement	P4		r	cloning
20759	20778	complement	P4		r	cloning
20778	20797		P0		f	cloning
20768	20787	complement	P0		r	cloning
20768	20787	complement	P1		r	cloning
20795	20814		P0		f	cloning
20795	20814		P1		f	cloning
20795	20814		P4		f	cloning
20785	20804	complement	P0		r	cloning
20785	20804	complement	P1		r	cloning
20785	20804	complement	P4		r	cloning
20814	20833		P4		f	cloning
20819	20838	complement	P4		r	cloning
20840	20859		P0		f	cloning
20840	20859		P1		f	cloning
20840	20859		P4		f	cloning
20841	20860		P4		f	cloning
20842	20861		P0		f	cloning
20842	20861		P4		f	cloning
20823	20842	complement	P4		r	cloning
20830	20849	complement	P0		r	cloning
20830	20849	complement	P1		r	cloning
20830	20849	complement	P4		r	cloning
20850	20869		P4		f	cloning
20851	20870		P4		f	cloning
20832	20851	complement	P0		r	cloning
20834	20853	complement	P0		r	cloning
20837	20856	complement	P4		r	cloning
20846	20865	complement	P4		r	cloning
20882	20901		P1		f	cloning
20882	20901		P4		f	cloning
20883	20902		P4		f	cloning
20884	20903		P0		f	cloning
20884	20903		P1		f	cloning
20884	20903		P4		f	cloning
20886	20905		P0		f	cloning
20886	20905		P1		f	cloning
20887	20906		P4		f	cloning
20891	20910		P0		f	cloning
20891	20910		P4		f	cloning
20873	20892	complement	P4		r	cloning
20874	20893	complement	P0		r	cloning
20874	20893	complement	P1		r	cloning
20874	20893	complement	P4		r	cloning
20894	20913		P0		f	cloning
20894	20913		P1		f	cloning
20894	20913		P4		f	cloning
20876	20895	complement	P0		r	cloning
20876	20895	complement	P1		r	cloning
20895	20914		P4		f	cloning
20896	20915		P0		f	cloning
20896	20915		P1		f	cloning
20896	20915		P4		f	cloning
20879	20898	complement	P4		r	cloning
20898	20917		P0		f	cloning
20898	20917		P1		f	cloning
20898	20917		P4		f	cloning
20880	20899	complement	P4		r	cloning
20884	20903	complement	P0		r	cloning
20884	20903	complement	P1		r	cloning
20884	20903	complement	P4		r	cloning
20886	20905	complement	P0		r	cloning
20886	20905	complement	P1		r	cloning
20886	20905	complement	P4		r	cloning
20888	20907	complement	P0		r	cloning
20888	20907	complement	P1		r	cloning
20888	20907	complement	P4		r	cloning
20908	20927		P0		f	cloning
20908	20927		P1		f	cloning
20908	20927		P4		f	cloning
20910	20929		P0		f	cloning
20910	20929		P1		f	cloning
20910	20929		P4		f	cloning
20917	20936		P1		f	cloning
20898	20917	complement	P0		r	cloning
20898	20917	complement	P1		r	cloning
20898	20917	complement	P4		r	cloning
20900	20919	complement	P0		r	cloning
20900	20919	complement	P4		r	cloning
20919	20938		P4		f	cloning
20923	20942		P1		f	cloning
20904	20923	complement	P4		r	cloning
20925	20944		P0		f	cloning
20926	20945		P0		f	cloning
20926	20945		P1		f	cloning
20926	20945		P4		f	cloning
20910	20929	complement	P4		r	cloning
20915	20934	complement	P4		r	cloning
20916	20935	complement	P0		r	cloning
20916	20935	complement	P1		r	cloning
20916	20935	complement	P4		r	cloning
20939	20958		P0		f	cloning
20939	20958		P4		f	cloning
20944	20963		P0		f	cloning
20944	20963		P1		f	cloning
20944	20963		P4		f	cloning
20946	20965		P0		f	cloning
20946	20965		P4		f	cloning
20929	20948	complement	P0		r	cloning
20934	20953	complement	P0		r	cloning
20934	20953	complement	P1		r	cloning
20934	20953	complement	P4		r	cloning
20936	20955	complement	P0		r	cloning
20936	20955	complement	P1		r	cloning
20936	20955	complement	P4		r	cloning
20955	20974		P4		f	cloning
20959	20978		P0		f	cloning
20962	20981		P4		f	cloning
20944	20963	complement	P4		r	cloning
20947	20966	complement	P1		r	cloning
20948	20967	complement	P1		r	cloning
20948	20967	complement	P4		r	cloning
20949	20968	complement	P0		r	cloning
20950	20969	complement	P4		r	cloning
20974	20993		P0		f	cloning
20975	20994		P0		f	cloning
20975	20994		P4		f	cloning
20957	20976	complement	P4		r	cloning
20978	20997		P0		f	cloning
20978	20997		P1		f	cloning
20978	20997		P4		f	cloning
20963	20982	complement	P4		r	cloning
20965	20984	complement	P0		r	cloning
20965	20984	complement	P4		r	cloning
20968	20987	complement	P0		r	cloning
20968	20987	complement	P1		r	cloning
20968	20987	complement	P4		r	cloning
20993	21012		P0		f	cloning
20993	21012		P1		f	cloning
20993	21012		P4		f	cloning
20976	20995	complement	P4		r	cloning
20995	21014		P4		f	cloning
20996	21015		P4		f	cloning
21001	21020		P0		f	cloning
20983	21002	complement	P0		r	cloning
20983	21002	complement	P1		r	cloning
20983	21002	complement	P4		r	cloning
21004	21023		P0		f	cloning
21004	21023		P1		f	cloning
20985	21004	complement	P1		r	cloning
20993	21012	complement	P1		r	cloning
[truncated: 47,738 more rows]
