# Supplementary material for: Essential metabolism for a minimal cell
Source: eLife. 2019 Jan 18;8:e36842. doi: 10.7554/eLife.36842 (PMC6609329; doi:10.7554/eLife.36842)
Supplement: Supplementary file 3. [file elife-36842-supp3.xlsx]

## Sheet: Essentiality
Locus name (syn3A)	Locus name (syn1.0)	Feature type	Gene	product	KEGG ortholog ID	Primary functional class	Secondary functional class	Tertiary functional class	KEGG annotation	Reaction name	Essentiality (FBA)	Gene knockout doubling time (FBA)	Begin (syn3A)	End (syn3A)	Length (syn3A)	Strand (syn3A)	Essentiality (PM)	Essentiality (KM)	Essentiality (Manual)	Essentiality	Tn5 inserts (P0)	Tn5 insertion rate (P0)	Tn5 inserts (P1)	Tn5 insertion rate (P1)	Tn5 inserts (P4)	Tn5 insertion rate (P4)	P(Essential)	P(Quasiessential)	P(Nonessential)	P(Inconsistent)
JCVISYN3A_0001	MMSYN1_0001	CDS	dnaA	Chromosomal replication initiator protein	K02313	Genetic Information Processing	DNA Maintenance	DNA replication control	dnaA; chromosomal replication initiator protein				0	1353	1353	1	Essential			Essential	0	0	0	0	0	0	1	0	0	0
JCVISYN3A_0002	MMSYN1_0002	CDS	dnaN	DNA polymerase III subunit beta	K02338	Genetic Information Processing	DNA Maintenance	DNA replication complex	DPO3B, dnaN; DNA polymerase III subunit beta				1510	2638	1128	1	Essential			Essential	3	0.00265957	2	0.00177305	1	0.000886525	1	1.11022e-16	0	0
JCVISYN3A_0003	MMSYN1_0003	CDS	rnmV	Ribonuclease M5	K05985	Genetic Information Processing	Translation	Ribosome biogenesis	rnmV; ribonuclease M5				2674	3217	543	1	Nonessential	Quasiessential		Quasiessential	31	0.0570902	23	0.0423573	16	0.0294659	3.91047e-30	6.13426e-13	1	6.3748e-18
JCVISYN3A_0004	MMSYN1_0004	CDS	ksgA	16S rRNA (adenine(1518)-N(6)/adenine(1519)-N(6))-dimethyltransferase	K02528	Genetic Information Processing	Translation	Ribosome biogenesis	ksgA; 16S rRNA (adenine1518-N6/adenine1519-N6)-dimethyltransferase				3206	4007	801	1	Nonessential	Nonessential		Nonessential	41	0.051186	29	0.0362047	25	0.031211	2.00473e-40	6.35995e-21	1	3.15211e-20
JCVISYN3A_0005	MMSYN1_0005	CDS	0005	Uncharacterized protein		Unclear	No Kegg ortholog	Function unknown	???				4063	5155	1092	1	Nonessential	Nonessential		Nonessential	98	0.0897436	70	0.0641026	65	0.0595238	3.21225e-135	1.04759e-71	1	3.06633e-64
JCVISYN3A_0006	MMSYN1_0006	CDS	gyrB	DNA gyrase subunit B	K02470	Genetic Information Processing	DNA Maintenance	DNA replication control	gyrB; DNA gyrase subunit B				5514	7419	1905	1	Essential			Essential	13	0.00682415	1	0.000524934	1	0.000524934	1	0	0	0
JCVISYN3A_0007	MMSYN1_0007	CDS	gyrA	DNA gyrase subunit A	K02469	Genetic Information Processing	DNA Maintenance	DNA replication control	gyrA; DNA gyrase subunit A				7434	9939	2505	1	Essential			Essential	28	0.0111776	7	0.00279441	4	0.00159681	1	0	0	0
JCVISYN3A_0008	MMSYN1_0008	CDS	rnsD	Nucleoside ABC transporter permease	K02057	Metabolism	Membrane Transport	Nucleic acids	ABC.SS.P; simple sugar transport system permease protein	RNS	Essential		9990	10968	978	-1	Essential			Essential	21	0.0214724	0	0	0	0	1	0	0	0
JCVISYN3A_0009	MMSYN1_0009	CDS	rnsC	Nucleoside ABC transporter permease	K02057	Metabolism	Membrane Transport	Nucleic acids	ABC.SS.P; simple sugar transport system permease protein	RNS	Essential		10967	13535	2568	-1	Essential			Essential	45	0.0175234	6	0.00233645	0	0	1	0	0	0
JCVISYN3A_0010	MMSYN1_0010	CDS	rnsA	Nucleoside ABC transporter ATP-binding protein	K02056	Metabolism	Membrane Transport	Nucleic acids	ABC.SS.A; simple sugar transport system ATP-binding protein	RNS	Essential		13524	15141	1617	-1	Essential			Essential	33	0.0204082	1	0.000618429	0	0	1	0	0	0
JCVISYN3A_0011	MMSYN1_0011	CDS	rnsB	Nucleoside ABC transporter substrate-binding protein	K07335	Metabolism	Membrane Transport	Nucleic acids	bmpA, bmpB, tmpC; basic membrane protein A and related proteins	RNS	Essential		15152	16799	1647	-1	Essential			Essential	43	0.0261081	3	0.00182149	3	0.00182149	1	0	0	0
JCVISYN3A_0012	MMSYN1_0012	CDS	metRS	Methionine--tRNA ligase	K01874	Genetic Information Processing	Translation	tRNA loading	MARS, metG; methionyl-tRNA synthetase	METTRS	Essential		16985	18515	1530	-1	Essential			Essential	9	0.00588235	5	0.00326797	2	0.00130719	1	0	0	0
JCVISYN3A_0918		manip	HIS3	Imidazoleglycerol-phosphate dehydratase	K01693	Metabolism	Biosynthesis	Amino acid metabolism	hisB; imidazoleglycerol-phosphate dehydratase				18715	19378	663	-1	Essential		Nonessential	Nonessential	4	0.00603318	6	0.00904977	4	0.00603318	0.999998	2.12417e-06	3.96623e-13	1.86719e-07
JCVISYN3A_0913	MMSYN1_0913	manip	tetM	Tetracycline resistance ribosomal protection protein	K18220	Human Diseases	Drug resistance	Antimicrobial resistance genes	tetM, tetO; ribosomal protection tetracycline resistance protein				20415	22335	1920	1	Essential		Nonessential	Nonessential	3	0.0015625	1	0.000520833	3	0.0015625	1	1.11022e-16	0	0
JCVISYN3A_0025	MMSYN1_0025	CDS	rpsR	30S ribosomal protein S18	K02963	Genetic Information Processing	Translation	Ribosome	RP-S18, MRPS18, rpsR; small subunit ribosomal protein S18				22768	22996	228	-1	Essential			Essential	2	0.00877193	0	0	0	0	0.999946	2.62325e-05	7.38424e-10	2.81477e-05
JCVISYN3A_0026	MMSYN1_0026	CDS	priB	Single-stranded DNA-binding protein	K03111	Genetic Information Processing	DNA Maintenance	DNA replication	ssb; single-strand DNA-binding protein				23015	23456	441	-1	Essential			Essential	6	0.0136054	0	0	0	0	1	2.13944e-09	9.37113e-18	4.38019e-09
JCVISYN3A_0027	MMSYN1_0027	CDS	rpsF	30S ribosomal protein S6	K02990	Genetic Information Processing	Translation	Ribosome	RP-S6, MRPS6, rpsF; small subunit ribosomal protein S6				23467	23881	414	-1	Essential			Essential	1	0.00241546	0	0	0	0	1	7.05616e-09	9.39208e-17	1.33105e-08
JCVISYN3A_0029	MMSYN1_0029	CDS	0029	Uncharacterized FMN-dependent NADH-azoreductase	K01118	Metabolism	Other Enzymes	Other enzymes	acpD, azoR; FMN-dependent NADH-azoreductase				24272	24872	600	1	Essential			Essential	10	0.0166667	3	0.005	1	0.00166667	1	8.07938e-09	1.27626e-18	1.57966e-10
JCVISYN3A_0030	MMSYN1_0030	CDS	0030	Uncharacterized ABC transporter ATP-binding protein	K02003	Metabolism	Membrane Transport	Generic	ABC.CD.A; putative ABC transport system ATP-binding protein				24908	25943	1035	-1	Essential			Essential	13	0.0125604	11	0.010628	2	0.00193237	1	1.71834e-07	0	0
JCVISYN3A_0033	MMSYN1_0033	CDS	0033	Uncharacterized protein		Unclear	No Kegg ortholog	Function unknown	???				26203	29362	3159	-1	Essential			Essential	7	0.00221589	3	0.000949668	2	0.000633112	1	0	0	0
JCVISYN3A_0034	MMSYN1_0034	CDS	0034	Uncharacterized efflux ABC transporter permease		Metabolism	Membrane Transport	Generic	???				29508	34896	5388	1	Nonessential	Nonessential		Nonessential	564	0.104677	351	0.0651448	383	0.0710839	0	0	1	0
JCVISYN3A_0039	MMSYN1_0039	CDS	ftsH	Membrane anchored AAA+ protease	K03798	Cellular Processes	Cell Growth	Cell division	ftsH, hflB; cell division protease FtsH				35061	37008	1947	-1	Essential			Essential	7	0.00359527	7	0.00359527	3	0.00154083	1	0	0	1.11022e-16
JCVISYN3A_0040	MMSYN1_0040	CDS	tilS	tRNA lysidine(34) synthetase	K04075	Genetic Information Processing	Translation	tRNA biogenesis	tilS, mesJ; tRNA(Ile)-lysidine synthase				37239	38445	1206	-1	Essential			Essential	18	0.0149254	3	0.00248756	0	0	1	0	0	1.11022e-16
JCVISYN3A_0042	MMSYN1_0042	CDS	0042	Uncharacterized transcriptional regulator		Genetic Information Processing	Transcription	Transcription factors	???				38447	39275	828	-1	Nonessential	Quasiessential		Quasiessential	56	0.0676329	31	0.0374396	14	0.0169082	1.90401e-26	4.81064e-05	0.999952	3.95773e-22
JCVISYN3A_0043	MMSYN1_0043	CDS	yabD	Uncharacterized methyltransferase		Unclear	No Kegg ortholog	Function unknown	???				39326	40049	723	-1	Nonessential	Nonessential		Nonessential	58	0.0802213	40	0.055325	34	0.0470263	3.21265e-69	6.48934e-35	1	4.95066e-35
JCVISYN3A_0044	MMSYN1_0044	CDS	holA	DNA polymerase III subunit delta	K02340	Genetic Information Processing	DNA Maintenance	DNA replication complex	DPO3D1, holA; DNA polymerase III subunit delta				40048	40789	741	-1	Essential			Essential	11	0.0148448	2	0.00269906	1	0.00134953	1	9.79883e-13	4.66595e-25	4.76175e-13
JCVISYN3A_0045	MMSYN1_0045	CDS	tmk	dTMP kinase	K00943	Metabolism	Central Carbon Metabolism	Nucleotide metabolism	tmk, DTYMK; dTMP kinase	TMPK	Essential		40766	41408	642	-1	Essential			Essential	9	0.0140187	0	0	0	0	1	2.96541e-13	3.31234e-25	1.117e-12
JCVISYN3A_0046	MMSYN1_0046	CDS	recR	Recombination protein	K06187	Genetic Information Processing	DNA Maintenance	Homologous recombination	recR; recombination protein RecR				41410	42001	591	-1	Quasiessential			Quasiessential	30	0.0507614	17	0.0287648	7	0.0118443	9.11779e-10	0.945904	0.0540961	5.21446e-11
JCVISYN3A_0047	MMSYN1_0047	CDS	dnaX	DNA polymerase III subunit gamma and tau	K02343	Genetic Information Processing	DNA Maintenance	DNA replication complex	DPO3G, dnaX; DNA polymerase III subunit gamma/tau				42002	44009	2007	-1	Essential			Essential	4	0.00199302	1	0.000498256	2	0.000996512	1	0	0	0
JCVISYN3A_0049	MMSYN1_0049	ncRNA	ffs	Signal recognition particle sRNA small type	K03106	Genetic Information Processing	Folding, Sorting and Degradation	Protein export	SRP54, ffh; signal recognition particle subunit SRP54				44177	44273	96	-1	Inconsistent		Essential	Essential	4	0.0416667	1	0.0104167	2	0.0208333	0.172522	0.0250708	0.10181	0.700597
JCVISYN3A_0051		pseudo	0051(3A)	Truncated protein="internal stop; Derived by automated computational analysis using gene prediction method: Protein Homology.		Unclear	No Kegg ortholog	Function unknown	???				44396	45011	615	-1	Nonessential	Nonessential		Nonessential	25	0.0406504	17	0.0276423	18	0.0292683	5.25297e-23	1.8866e-14	1	2.78436e-09
JCVISYN3A_0054	MMSYN1_0054	CDS	ahpC	Uncharacterized peroxiredoxin	K03564	Metabolism	Other Enzymes	Other enzymes	BCP, PRXQ, DOT5; peroxiredoxin Q/BCP				45292	45742	450	-1	Nonessential	Nonessential		Nonessential	27	0.06	20	0.0444444	17	0.0377778	2.36541e-31	5.31475e-16	1	4.45066e-16
JCVISYN3A_0060	MMSYN1_0060	CDS	0060	Uncharacterized protein		Unclear	No Kegg ortholog	Function unknown	???				46273	47098	825	1	Quasiessential			Quasiessential	82	0.0993939	15	0.0181818	2	0.00242424	0.00779309	0.992207	3.73543e-13	2.93392e-15
JCVISYN3A_0061	MMSYN1_0061	CDS	serRS	Serine--tRNA ligase	K01875	Genetic Information Processing	Translation	tRNA loading	SARS, serS; seryl-tRNA synthetase	SERTRS	Essential		47180	48449	1269	1	Essential			Essential	13	0.0102443	3	0.00236407	2	0.00157604	1	0	0	0
JCVISYN3A_0063	MMSYN1_0063	CDS	dusB	Uncharacterized tRNA dihydrouridine synthase	K05540	Genetic Information Processing	Translation	tRNA biogenesis	dusB; tRNA-dihydrouridine synthase B				48558	49533	975	1	Nonessential	Nonessential		Nonessential	89	0.0912821	47	0.0482051	47	0.0482051	1.53455e-86	1.32451e-48	1	1.15858e-38
JCVISYN3A_0064	MMSYN1_0064	CDS	lysRS	Lysine--tRNA ligase	K04567	Genetic Information Processing	Translation	tRNA loading	KARS, lysS; lysyl-tRNA synthetase, class II	LYSTRS	Essential		49535	51038	1503	1	Essential			Essential	30	0.0199601	9	0.00598802	4	0.00266134	1	0	0	1.11022e-16
JCVISYN3A_0065	MMSYN1_0065	CDS	trxA	Thioredoxin	K03671	Metabolism	Other Enzymes	Other enzymes	trxA; thioredoxin 1	TRDR	Essential		51127	51436	309	-1	Inconsistent		Essential	Essential	12	0.038835	4	0.012945	5	0.0161812	0.0866196	0.00436999	0.0436573	0.865353
JCVISYN3A_0066	MMSYN1_0066	CDS	0066	Low specificity hydrolase		Unclear	No Kegg ortholog	Function unknown	???				51446	52289	843	-1	Nonessential	Quasiessential		Quasiessential	82	0.0972716	45	0.0533808	17	0.0201661	5.02382e-47	5.64239e-09	1	8.90371e-39
JCVISYN3A_0067	MMSYN1_0067	rRNA	rrfA	5S ribosomal RNA	K01985	Genetic Information Processing	Non-coding RNA	rRNA	5SrRNA, rrf; 5S ribosomal RNA				52409	52518	109	-1	Essential			Essential	4	0.0366972	1	0.00917431	1	0.00917431	0.844377	0.0690752	0.00654472	0.0800029
JCVISYN3A_0068	MMSYN1_0068	rRNA	rrlA	23S ribosomal RNA	K01980	Genetic Information Processing	Non-coding RNA	rRNA	23SrRNA, rrl; 23S ribosomal RNA				52579	55493	2914	-1	Essential			Essential	0	0	0	0	0	0	1	0	0	0
JCVISYN3A_0069	MMSYN1_0069	rRNA	rrsA	16S ribosomal RNA	K01977	Genetic Information Processing	Non-coding RNA	rRNA	16SrRNA, rrs; 16S ribosomal RNA				55712	57247	1535	-1	Essential			Essential	0	0	0	0	0	0	1	0	0	1.11022e-16
JCVISYN3A_0070	MMSYN1_0070	tRNA	Leu	tRNA-Leu	K14228	Genetic Information Processing	Non-coding RNA	tRNA	tRNA-Leu; tRNA Leu				57524	57608	84	-1	Essential			Essential	1	0.0119048	0	0	0	0	0.974692	0.0148535	0.000156928	0.0102977
JCVISYN3A_0071	MMSYN1_0071	tRNA	Lys	tRNA-Lys	K14229	Genetic Information Processing	Non-coding RNA	tRNA	tRNA-Lys; tRNA Lys				57610	57686	76	-1	Essential			Essential	0	0	0	0	0	0	0.964592	0.0209347	0.000307441	0.0141657
JCVISYN3A_0076	MMSYN1_0076	CDS	asnRS	Asparagine--tRNA ligase	K01893	Genetic Information Processing	Translation	tRNA loading	NARS, asnS; asparaginyl-tRNA synthetase	ASNTRS	Essential		58155	59520	1365	-1	Essential			Essential	5	0.003663	0	0	0	0	1	0	0	0
JCVISYN3A_0077	MMSYN1_0077	CDS	0077	Uncharacterized hydrolase		Unclear	No Kegg ortholog	Function unknown	???				59528	60368	840	-1	Nonessential	Quasiessential		Quasiessential	54	0.0642857	41	0.0488095	24	0.0285714	4.27684e-52	7.94934e-19	1	5.38012e-34
JCVISYN3A_0079	MMSYN1_0079	CDS	tsaD	tRNA (adenosine(37)-N6)-threonylcarbamoyltransferase complex transferase subunit D	K01409	Genetic Information Processing	Translation	tRNA biogenesis	KAE1, tsaD, QRI7; N6-L-threonylcarbamoyladenine synthase				60403	61360	957	-1	Essential			Essential	11	0.0114943	0	0	1	0.00104493	1	0	0	1.11022e-16
JCVISYN3A_0080	MMSYN1_0080	CDS	0080	Uncharacterized protein		Unclear	No Kegg ortholog	Function unknown	???				61454	61676	222	-1	Nonessential	Nonessential		Nonessential	34	0.153153	15	0.0675676	15	0.0675676	5.87582e-31	2.80949e-17	1	2.09142e-14
JCVISYN3A_0081	MMSYN1_0081	CDS	mnmE	tRNA uridine(34) 5-carboxymethylaminomethyl synthesis GTPase	K03650	Genetic Information Processing	Translation	tRNA biogenesis	mnmE, trmE, MSS1; tRNA modification GTPase				61875	63234	1359	1	Nonessential	Quasiessential		Quasiessential	122	0.0897719	80	0.0588668	34	0.0250184	4.97958e-94	1.52226e-23	1	3.27117e-71
JCVISYN3A_0082	MMSYN1_0082	CDS	rpsT	30S ribosomal protein S20	K02968	Genetic Information Processing	Translation	Ribosome	RP-S20, rpsT; small subunit ribosomal protein S20				63284	63530	246	-1	Nonessential	Quasiessential		Quasiessential	23	0.0934959	16	0.0650407	6	0.0243902	1.11115e-18	0.000298091	0.999702	3.72644e-15
JCVISYN3A_0094	MMSYN1_0094	CDS	0094	Uncharacterized protein		Unclear	No Kegg ortholog	Function unknown	???				63663	64380	717	-1	Nonessential	Nonessential		Nonessential	50	0.069735	30	0.041841	35	0.0488145	9.58958e-59	2.01972e-36	1	4.74798e-23
JCVISYN3A_0095	MMSYN1_0095	CDS	secA	Preprotein translocase subunit A	K03070	Genetic Information Processing	Folding, Sorting and Degradation	Protein export	secA; preprotein translocase subunit SecA				64494	67329	2835	-1	Inconsistent		Essential	Essential	93	0.0328042	43	0.0151675	45	0.015873	1.48935e-12	3.69246e-15	0.00247311	0.997527
JCVISYN3A_0097	MMSYN1_0097	CDS	yycJ	Uncharacterized 5'-3' exonuclease	K02335	Genetic Information Processing	DNA Maintenance	DNA replication	DPO1, polA; DNA polymerase I				67493	68405	912	1	Nonessential	Quasiessential		Quasiessential	69	0.0756579	54	0.0592105	12	0.0131579	1.19463e-48	0.490356	0.509644	1.24162e-48
JCVISYN3A_0105	MMSYN1_0105	CDS	xseB	Exodeoxyribonuclease VII small subunit	K03602	Genetic Information Processing	DNA Maintenance	Mismatch repair	xseB; exodeoxyribonuclease VII small subunit				68808	69024	216	-1	Nonessential	Nonessential		Nonessential	12	0.0555556	9	0.0416667	8	0.037037	4.00257e-14	1.37676e-07	1	2.90724e-07
JCVISYN3A_0106	MMSYN1_0106	CDS	xseA	Exodeoxyribonuclease VII large subunit	K03601	Genetic Information Processing	DNA Maintenance	Mismatch repair	xseA; exodeoxyribonuclease VII large subunit				69013	70423	1410	-1	Nonessential	Nonessential		Nonessential	138	0.0978723	92	0.0652482	85	0.0602837	4.89461e-178	5.15801e-94	1	9.48932e-85
JCVISYN3A_0107	MMSYN1_0107	CDS	nusB	Transcription antitermination factor	K03625	Genetic Information Processing	Transcription	Transcription factors	nusB; N utilization substance protein B				70424	70823	399	-1	Quasiessential			Quasiessential	25	0.0626566	7	0.0175439	0	0	0.199137	0.800863	1.9766e-08	4.91487e-09
JCVISYN3A_0108	MMSYN1_0108	CDS	0108	Uncharacterized lipoprotein		Unclear	No Kegg ortholog	Function unknown	???				70834	71947	1113	-1	Nonessential	Quasiessential		Quasiessential	70	0.0628931	40	0.0359389	16	0.0143756	1.42814e-29	0.00941901	0.990581	1.50195e-27
JCVISYN3A_0109	MMSYN1_0109	CDS	nfo	Deoxyribonuclease IV	K01151	Genetic Information Processing	DNA Maintenance	Base excision repair	nfo; deoxyribonuclease IV				71972	72842	870	-1	Nonessential	Quasiessential		Quasiessential	90	0.103448	61	0.0701149	18	0.0206897	8.85391e-67	6.83158e-10	1	1.29603e-57
JCVISYN3A_0113	MMSYN1_0113	CDS	epsG	Glycolipid synthase A		Metabolism	Biosynthesis	Lipid metabolism	???	PSSYN	Essential		73087	74437	1350	1	Essential			Essential	18	0.0133333	12	0.00888889	0	0	1	2.50222e-12	2.77802e-28	1.11022e-16
JCVISYN3A_0114	MMSYN1_0114	CDS	cps	Glycolipid synthase B		Metabolism	Biosynthesis	Lipid metabolism	???	DAGPST/DAGGALT	Essential		74510	75431	921	-1	Essential			Essential	20	0.0217155	7	0.00760043	1	0.00108578	1	3.84191e-10	1.70615e-25	4.44089e-16
JCVISYN3A_0115	MMSYN1_0115	CDS	galU	UTP--glucose-1-phosphate uridylyltransferase	K00963	Metabolism	Central Carbon Metabolism	Carbohydrate metabolism	UGP2, galU, galF; UTP--glucose-1-phosphate uridylyltransferase	GALU	Essential		75878	76751	873	-1	Essential			Essential	8	0.0091638	7	0.00801833	0	0	1	3.20563e-09	3.55896e-25	1.11022e-16
JCVISYN3A_0116	MMSYN1_0116	CDS	0116	Uncharacterized protein		Unclear	No Kegg ortholog	Function unknown	???				76935	77376	441	-1	Quasiessential			Quasiessential	14	0.031746	18	0.0408163	4	0.00907029	7.84002e-14	0.998265	0.00173504	1.36264e-16
JCVISYN3A_0117	MMSYN1_0117	CDS	plsY	Acyl-phosphate glycerol 3-phosphate acyltransferase	K08591	Metabolism	Biosynthesis	Lipid metabolism	plsY; glycerol-3-phosphate acyltransferase PlsY	APG3PAT	Essential		77445	78207	762	1	Essential			Essential	28	0.0367454	6	0.00787402	7	0.00918635	0.99995	2.67208e-08	1.33987e-12	5.01408e-05
JCVISYN3A_0126	MMSYN1_0126	CDS	gluRS	Glutamate--tRNA ligase	K09698	Genetic Information Processing	Translation	tRNA loading	gltX; nondiscriminating glutamyl-tRNA synthetase	GLUTRS_Gln	Essential		78402	79854	1452	1	Essential			Essential	9	0.00619835	2	0.00137741	0	0	1	0	0	0
JCVISYN3A_0127	MMSYN1_0127	CDS	0127	Uncharacterized phosphohydrolase	K06885	Unclear	Kegg ortholog defined	Function unknown	K06885; uncharacterized protein				79856	81071	1215	1	Nonessential	Nonessential		Nonessential	106	0.0872428	71	0.0584362	81	0.0666667	2.90267e-154	6.68159e-92	1	4.34429e-63
JCVISYN3A_0128	MMSYN1_0128	CDS	rpoE	DNA-directed RNA polymerase subunit delta	K03048	Genetic Information Processing	Transcription	Transcription machinery	rpoE; DNA-directed RNA polymerase subunit delta				81096	81525	429	1	Nonessential	Quasiessential		Quasiessential	58	0.135198	44	0.102564	17	0.039627	3.65204e-61	2.23897e-16	1	1.63112e-45
JCVISYN3A_0129	MMSYN1_0129	CDS	pyrG	CTP synthase	K01937	Metabolism	Central Carbon Metabolism	Nucleotide metabolism	pyrG, CTPS; CTP synthase	CTPS	Essential		81616	83215	1599	1	Essential			Essential	13	0.00813008	5	0.00312695	1	0.000625391	1	0	0	0
JCVISYN3A_0131	MMSYN1_0131	CDS	fbaA	Fructose-1,6-bisphosphate aldolase	K01624	Metabolism	Central Carbon Metabolism	Glycolysis	FBA, fbaA; fructose-bisphosphate aldolase, class II	FBA	Essential		83503	84397	894	1	Essential			Essential	7	0.00782998	2	0.00223714	0	0	1	1.11022e-15	0	0
JCVISYN3A_0132	MMSYN1_0132	CDS	ietA	Toxin-antitoxin AAA ATPase		Cellular Processes	Defense	Prokaryotic defense system	???				84545	85607	1062	1	Essential			Essential	32	0.0301318	16	0.0150659	7	0.00659134	0.94495	0.0550499	1.19571e-11	2.05248e-10
JCVISYN3A_0133	MMSYN1_0133	CDS	ietS	Toxin-antitoxin serine protease		Cellular Processes	Defense	Prokaryotic defense system	???	Peptidase 1	Nonessential	2.02442	85599	87873	2274	1	Nonessential	Nonessential		Nonessential	234	0.102902	136	0.0598065	116	0.0510114	1.27336e-242	5.88831e-122	1	2.16251e-121
JCVISYN3A_0137	MMSYN1_0137	CDS	rpmE	50S ribosomal protein L31	K02909	Genetic Information Processing	Translation	Ribosome	RP-L31, rpmE; large subunit ribosomal protein L31				88732	89011	279	1	Unclassifiable		Essential	Essential	16	0.0573477	5	0.0179211	4	0.0143369	0.103503	0.318692	0.436154	0.141651
JCVISYN3A_0138	MMSYN1_0138	CDS	0138	Uncharacterized protein		Unclear	No Kegg ortholog	Function unknown	???				89083	90982	1899	1	Quasiessential			Quasiessential	57	0.0300158	32	0.016851	14	0.0073723	0.00874857	0.991251	1.32061e-15	1.16554e-17
JCVISYN3A_0139	MMSYN1_0139	CDS	ytqI	NanoRNAse	K06881	Genetic Information Processing	Folding, Sorting and Degradation	RNA degradation	nrnA; bifunctional oligoribonuclease and PAP phosphatase NrnA	BPNT	Essential		90991	91942	951	1	Quasiessential			Quasiessential	52	0.0546793	35	0.0368034	4	0.0042061	1.31723e-24	1	1.3255e-12	1.74598e-36
JCVISYN3A_0140	MMSYN1_0140	CDS	tdk	Thymidine kinase	K00857	Metabolism	Central Carbon Metabolism	Nucleotide metabolism	tdk, TK; thymidine kinase	TMDK1/DURIK1	Essential		91943	92573	630	1	Essential			Essential	8	0.0126984	3	0.0047619	0	0	1	2.14548e-09	3.92761e-21	1.83065e-12
JCVISYN3A_0141	MMSYN1_0141	CDS	prfA	Peptide chain release factor 1	K02835	Genetic Information Processing	Translation	Translation factors	prfA, MTRF1, MRF1; peptide chain release factor 1				92575	93670	1095	1	Essential			Essential	22	0.0200913	8	0.00730594	2	0.00182648	1	2.84628e-12	0	0
JCVISYN3A_0142	MMSYN1_0142	CDS	prmC	Protein-(glutamine-N5) methyltransferase, release factor-specific	K02493	Genetic Information Processing	Translation	Translation factors	hemK, prmC, HEMK; release factor glutamine methyltransferase				93662	94511	849	1	Nonessential	Quasiessential		Quasiessential	53	0.0624264	36	0.0424028	26	0.0306243	1.63683e-48	1.82787e-21	1	8.95481e-28
JCVISYN3A_0143	MMSYN1_0143	CDS	0143	Uncharacterized protein		Unclear	No Kegg ortholog	Function unknown	???				94519	95992	1473	1	Essential			Essential	7	0.00475221	1	0.000678887	0	0	1	0	0	1.11022e-16
JCVISYN3A_0144	MMSYN1_0144	CDS	tsaC	tRNA (adenosine(37)-N6)-threonylcarbamoyltransferase complex transferase subunit	K07566	Genetic Information Processing	Translation	tRNA biogenesis	tsaC, rimN, SUA5; L-threonylcarbamoyladenylate synthase				96000	96501	501	1	Essential			Essential	2	0.00399202	2	0.00399202	0	0	1	3.96273e-08	1.46831e-17	3.7053e-10
JCVISYN3A_0145	MMSYN1_0145	CDS	0145	Uncharacterized acetyltransferase		Unclear	No Kegg ortholog	Function unknown	???				96615	97530	915	1	Essential			Essential	10	0.010929	2	0.00218579	0	0	1	4.44089e-16	0	0
JCVISYN3A_0146	MMSYN1_0146	CDS	0146	Uncharacterized protein		Unclear	No Kegg ortholog	Function unknown	???				97758	98466	708	1	Essential			Essential	5	0.00706215	0	0	0	0	1	1.60982e-14	1.18853e-27	7.38298e-14
JCVISYN3A_0147	MMSYN1_0147	CDS	clsA	Cardiolipin synthase	K06131	Metabolism	Biosynthesis	Lipid metabolism	clsA_B; cardiolipin synthase A/B	CLPNS	Essential		98465	99995	1530	1	Essential			Essential	5	0.00326797	0	0	0	0	1	0	0	0
JCVISYN3A_0148	MMSYN1_0148	CDS	rpsL	30S ribosomal protein S12	K02950	Genetic Information Processing	Translation	Ribosome	RP-S12, MRPS12, rpsL; small subunit ribosomal protein S12				100118	100538	420	1	Essential			Essential	1	0.00238095	0	0	0	0	1	5.41249e-09	5.62761e-17	1.03974e-08
JCVISYN3A_0149	MMSYN1_0149	CDS	rpsG	30S ribosomal protein S7	K02992	Genetic Information Processing	Translation	Ribosome	RP-S7, MRPS7, rpsG; small subunit ribosomal protein S7				100624	101092	468	1	Essential			Essential	0	0	1	0.00213675	0	0	1	1.05131e-08	1.51539e-17	1.44142e-09
JCVISYN3A_0150	MMSYN1_0150	CDS	EF-G	Translation elongation factor G	K02355	Genetic Information Processing	Translation	Translation factors	fusA, GFM, EFG; elongation factor G				101116	103186	2070	1	Essential			Essential	22	0.010628	4	0.00193237	0	0	1	0	0	0
JCVISYN3A_0151	MMSYN1_0151	CDS	EF-Tu	Translation elongation factor Tu	K02358	Genetic Information Processing	Translation	Translation factors	tuf, TUFM; elongation factor Tu				103317	104505	1188	1	Essential			Essential	24	0.020202	2	0.0016835	3	0.00252525	1	1.11022e-16	0	0
JCVISYN3A_0158	MMSYN1_0158	tmRNA	ssrA	Transfer-messenger RNA	K15035	Genetic Information Processing	Non-coding RNA	Other RNA	ssrA, sipB; transfer-messenger RNA				104781	105192	411	1	Essential			Essential	9	0.0218978	2	0.00486618	1	0.00243309	0.999998	2.1162e-06	7.99881e-13	3.7798e-07
JCVISYN3A_0163	MMSYN1_0163	CDS	alaRS	Alanine--tRNA ligase	K01872	Genetic Information Processing	Translation	tRNA loading	AARS, alaS; alanyl-tRNA synthetase	ALATRS	Essential		105430	108121	2691	-1	Essential			Essential	13	0.00483092	1	0.000371609	1	0.000371609	1	0	0	0
JCVISYN3A_0164	MMSYN1_0164	CDS	0164	Uncharacterized protein		Unclear	No Kegg ortholog	Function unknown	???				108194	108689	495	-1	Quasiessential			Quasiessential	20	0.040404	13	0.0262626	1	0.0020202	9.55248e-07	0.999999	1.19051e-08	1.13723e-14
JCVISYN3A_0165	MMSYN1_0165	CDS	oppB	Oligopeptide ABC transporter permease	K15581	Metabolism	Membrane Transport	Amino acid and peptides	oppB; oligopeptide transport system permease protein	Opp	Nonessential	2.02442	108906	110151	1245	1	Quasiessential			Quasiessential	152	0.122088	61	0.048996	2	0.00160643	2.04545e-50	1	0	0
JCVISYN3A_0166	MMSYN1_0166	CDS	oppC	Oligopeptide ABC transporter permease	K15582	Metabolism	Membrane Transport	Amino acid and peptides	oppC; oligopeptide transport system permease protein	Opp	Nonessential	2.02442	110166	111177	1011	1	Quasiessential			Quasiessential	140	0.138477	59	0.0583581	1	0.00098912	1.73193e-52	1	0	0
JCVISYN3A_0167	MMSYN1_0167	CDS	oppD	Oligopeptide ABC transporter ATP-binding protein	K15583	Metabolism	Membrane Transport	Amino acid and peptides	oppD; oligopeptide transport system ATP-binding protein	Opp	Nonessential	2.02442	111190	112891	1701	1	Quasiessential			Quasiessential	217	0.127572	62	0.0364491	2	0.00117578	7.14608e-43	1	0	0
JCVISYN3A_0168	MMSYN1_0168	CDS	oppF	Oligopeptide ABC transporter ATP-binding protein	K10823	Metabolism	Membrane Transport	Amino acid and peptides	oppF; oligopeptide transport system ATP-binding protein	Opp	Nonessential	2.02442	112892	114761	1869	1	Quasiessential			Quasiessential	182	0.0973783	56	0.0299625	0	0	2.173e-32	1	0	0
JCVISYN3A_0169	MMSYN1_0169	CDS	oppA	Oligopeptide ABC transporter substrate-binding protein	K15580	Metabolism	Membrane Transport	Amino acid and peptides	oppA, mppA; oligopeptide transport system substrate-binding protein	Opp	Nonessential	2.02442	114777	117879	3102	1	Quasiessential			Quasiessential	378	0.121857	165	0.0531915	8	0.00257898	1.4034e-140	1	0	0
JCVISYN3A_0195	MMSYN1_0195	CDS	potC	Spermidine/putrescine ABC transporter permease	K11070	Metabolism	Membrane Transport	Polyamines	potC; spermidine/putrescine transport system permease protein	SPRMabc	Essential		118737	121848	3111	-1	Quasiessential			Quasiessential	195	0.0626808	111	0.0356798	7	0.00225008	4.40379e-75	1	0	0
JCVISYN3A_0196	MMSYN1_0196	CDS	potB	Spermidine/putrescine ABC transporter permease	K11071	Metabolism	Membrane Transport	Polyamines	potB; spermidine/putrescine transport system permease protein	SPRMabc	Essential		121832	122825	993	-1	Quasiessential			Quasiessential	97	0.0976838	42	0.0422961	4	0.0040282	2.87042e-32	1	2.35256e-13	6.75285e-45
JCVISYN3A_0197	MMSYN1_0197	CDS	potA	Spermidine/putrescine ABC transporter ATP-binding protein	K11072	Metabolism	Membrane Transport	Polyamines	potA; spermidine/putrescine transport system ATP-binding protein	SPRMabc	Essential		122824	123880	1056	-1	Quasiessential			Quasiessential	86	0.0814394	40	0.0378788	0	0	1.22079e-28	1	1.11022e-16	1.35535e-44
JCVISYN3A_0198	MMSYN1_0198	CDS	rplT	50S ribosomal protein L20	K02887	Genetic Information Processing	Translation	Ribosome	RP-L20, MRPL20, rplT; large subunit ribosomal protein L20				124253	124613	360	-1	Essential			Essential	2	0.00555556	1	0.00277778	0	0	0.999999	1.24396e-06	1.52898e-13	1.22912e-07
JCVISYN3A_0199	MMSYN1_0199	CDS	rpmI	50S ribosomal protein L35	K02916	Genetic Information Processing	Translation	Ribosome	RP-L35, MRPL35, rpmI; large subunit ribosomal protein L35				124631	124823	192	-1	Essential			Essential	2	0.0104167	0	0	0	0	0.999747	0.000128759	1.59531e-08	0.000123868
JCVISYN3A_0200	MMSYN1_0200	CDS	infC	Translation initiation factor IF-3	K02520	Genetic Information Processing	Translation	Translation factors	infC, MTIF3; translation initiation factor IF-3				124848	125394	546	-1	Essential			Essential	3	0.00549451	0	0	0	0	1	2.06447e-11	1.19986e-21	5.81196e-11
JCVISYN3A_0201	MMSYN1_0201	CDS	def	Peptide deformylase	K01462	Genetic Information Processing	Translation	Translation factors	PDF, def; peptide deformylase	Pept. deformylase	Essential		125582	126185	603	-1	Essential			Essential	26	0.0431177	3	0.00497512	0	0	1	7.07608e-09	3.93626e-20	5.56277e-12
JCVISYN3A_0202	MMSYN1_0202	CDS	rsmD	16S rRNA (guanine(966)-N(2))-methyltransferase	K08316	Genetic Information Processing	Translation	Ribosome biogenesis	rsmD; 16S rRNA (guanine966-N2)-methyltransferase				126258	126816	558	1	Nonessential	Quasiessential		Quasiessential	31	0.0555556	19	0.0340502	8	0.0143369	1.29635e-13	0.151888	0.848112	7.23858e-13
JCVISYN3A_0203	MMSYN1_0203	CDS	gmk	Guanylate kinase	K00942	Metabolism	Central Carbon Metabolism	Nucleotide metabolism	E2.7.4.8, gmk; guanylate kinase	GK	Essential		126818	127712	894	1	Essential			Essential	11	0.0123043	3	0.0033557	1	0.00111857	1	1.85407e-14	1.4409e-29	7.77156e-16
JCVISYN3A_0213	MMSYN1_0213	CDS	eno	Phosphopyruvate hydratase	K01689	Metabolism	Central Carbon Metabolism	Glycolysis	ENO, eno; enolase	ENO	Essential		127919	129275	1356	1	Essential			Essential	13	0.00958702	2	0.00147493	1	0.000737463	1	0	0	0
JCVISYN3A_0214	MMSYN1_0214	CDS	pgpA	Phosphatidylglycerophosphatase	K01095	Metabolism	Biosynthesis	Lipid metabolism	pgpA; phosphatidylglycerophosphatase A	PGPP	Essential		129341	130163	822	1	Quasiessential			Quasiessential	26	0.0316302	15	0.0182482	0	0	0.00683195	0.993168	6.61583e-16	4.55099e-18
JCVISYN3A_0215	MMSYN1_0215	CDS	yrrK	Putative pre-16S rRNA nuclease	K07447	Genetic Information Processing	DNA Maintenance	DNA repair and recombination proteins	ruvX; putative holliday junction resolvase				130164	130596	432	1	Essential			Essential	17	0.0393519	5	0.0115741	0	0	0.996452	0.0035483	2.25119e-11	6.32192e-09
JCVISYN3A_0216	MMSYN1_0216	CDS	hptA	Hypoxanthine phosphoribosyltransferase	K00760	Metabolism	Central Carbon Metabolism	Nucleotide metabolism	hprT, hpt, HPRT1; hypoxanthine phosphoribosyltransferase	GUAPRT	Essential		130601	131174	573	1	Quasiessential			Quasiessential	53	0.0924956	41	0.0715532	3	0.0052356	4.03359e-39	1	3.02377e-07	1.21966e-45
JCVISYN3A_0218	MMSYN1_0218	CDS	glpK	Glycerol kinase	K00864	Metabolism	Biosynthesis	Lipid metabolism	glpK, GK; glycerol kinase	GLYK	Essential		131273	132791	1518	-1	Essential			Essential	46	0.030303	7	0.00461133	1	0.000658762	1	0	0	0
JCVISYN3A_0220	MMSYN1_0220	CDS	pfkA	6-Phosphofructokinase	K00850	Metabolism	Central Carbon Metabolism	Glycolysis	pfkA, PFK; 6-phosphofructokinase 1	PFK	Essential		133141	134122	981	1	Essential			Essential	17	0.0173293	1	0.00101937	0	0	1	1.11022e-16	0	0
JCVISYN3A_0221	MMSYN1_0221	CDS	pyk	Pyruvate kinase	K00873	Metabolism	Central Carbon Metabolism	Glycolysis	PK, pyk; pyruvate kinase	PYK	Essential		134192	135629	1437	1	Essential			Essential	12	0.00835073	0	0	1	0.000695894	1	0	0	0
JCVISYN3A_0222	MMSYN1_0222	CDS	thrRS	Threonine--tRNA ligase	K01868	Genetic Information Processing	Translation	tRNA loading	TARS, thrS; threonyl-tRNA synthetase	THRTRS	Essential		135893	137813	1920	1	Essential			Essential	8	0.00416667	2	0.00104167	1	0.000520833	1	0	0	0
JCVISYN3A_0227	MMSYN1_0227	CDS	pdhC	Branched-chain alpha-keto acid dehydrogenase subunit E2	K00627	Metabolism	Central Carbon Metabolism	Glycolysis	DLAT, aceF, pdhC; pyruvate dehydrogenase E2 component (dihydrolipoamide acetyltransferase)	PDH_E2/_acald	Nonessential	3.21921	138323	139649	1326	1	Nonessential	Nonessential		Nonessential	261	0.196833	186	0.140271	212	0.159879	0	0	1	4.49667e-200
JCVISYN3A_0228	MMSYN1_0228	CDS	pdhD	Dihydrolipoyl dehydrogenase	K00382	Metabolism	Central Carbon Metabolism	Glycolysis	DLD, lpd, pdhD; dihydrolipoamide dehydrogenase	PDH_E3	Nonessential	3.21921	139667	141557	1890	1	Nonessential	Nonessential		Nonessential	276	0.146032	197	0.104233	197	0.104233	0	3.41866e-242	1	1.48672e-202
JCVISYN3A_0229	MMSYN1_0229	CDS	pta	Phosphate acetyltransferase	K00625	Metabolism	Central Carbon Metabolism	Pyruvate metabolism	E2.3.1.8, pta; phosphate acetyltransferase	PTAr	Nonessential	3.21921	141578	142547	969	1	Essential			Essential	53	0.0546956	11	0.0113519	4	0.00412797	0.999997	3.17677e-06	2.00682e-18	6.31715e-13
JCVISYN3A_0230	MMSYN1_0230	CDS	ackA	Acetate kinase	K00925	Metabolism	Central Carbon Metabolism	Other central metabolism enzymes	ackA; acetate kinase	ACKr	Nonessential	3.21921	142559	143741	1182	1	Essential			Essential	48	0.0406091	14	0.0118443	6	0.00507614	0.999999	1.10288e-06	6.83238e-20	6.19504e-14
JCVISYN3A_0233	MMSYN1_0233	CDS	ptsI	Phosphoenolpyruvate--protein phosphotransferase	K08483	Metabolism	Membrane Transport	Carbohydrates	PTS-EI.PTSI, ptsI; phosphotransferase system, enzyme I, PtsI	GLCpts	Essential		143902	145624	1722	1	Essential			Essential	6	0.00348432	1	0.00058072	0	0	1	0	0	1.11022e-16
JCVISYN3A_0234	MMSYN1_0234	CDS	crr	PTS glucose transporter subunit IIA	K02777	Metabolism	Membrane Transport	Carbohydrates	PTS-Glc-EIIA, crr; PTS system, sugar-specific IIA component	GLCpts	Essential		145705	146170	465	1	Essential			Essential	7	0.0150538	0	0	0	0	1	7.40656e-10	1.20793e-18	1.63089e-09
JCVISYN3A_0235	MMSYN1_0235	CDS	0235	Uncharacterized protein		Unclear	No Kegg ortholog	Function unknown	???				146278	146461	183	1	Unclassifiable		Quasiessential	Quasiessential	7	0.0382514	3	0.0163934	2	0.010929	0.494703	0.403733	0.0456402	0.055924
JCVISYN3A_0238	MMSYN1_0238	CDS	rpsD	30S ribosomal protein S4	K02986	Genetic Information Processing	Translation	Ribosome	RP-S4, rpsD; small subunit ribosomal protein S4				146577	147204	627	-1	Essential			Essential	1	0.0015949	0	0	0	0	1	5.7554e-13	1.19201e-24	2.07112e-12
JCVISYN3A_0239	MMSYN1_0239	CDS	0239	Uncharacterized protein		Unclear	No Kegg ortholog	Function unknown	???				147458	149246	1788	1	Nonessential	Nonessential		Nonessential	53	0.0296421	37	0.0206935	31	0.0173378	6.57028e-22	1.1246e-11	1	5.84232e-11
JCVISYN3A_0240	MMSYN1_0240	CDS	thiI	tRNA 4-thiouridine(8) synthase	K03151	Genetic Information Processing	Translation	tRNA biogenesis	thiI; tRNA uracil 4-sulfurtransferase				149253	150441	1188	1	Nonessential	Quasiessential		Quasiessential	63	0.0530303	38	0.0319865	24	0.020202	1.45082e-35	1.32376e-12	1	1.09598e-23
JCVISYN3A_0247	MMSYN1_0247	CDS	ysxC	Ribosome biogenesis GTP-binding protein	K03978	Genetic Information Processing	Translation	Ribosome biogenesis	engB; GTP-binding protein				150613	151204	591	-1	Essential			Essential	19	0.0321489	9	0.0152284	4	0.00676819	0.821053	0.178943	6.47302e-07	2.97004e-06
JCVISYN3A_0248	MMSYN1_0248	CDS	0248	Uncharacterized protein		Unclear	No Kegg ortholog	Function unknown	???				151197	151758	561	-1	Nonessential	Nonessential		Nonessential	17	0.030303	10	0.0178253	8	0.0142602	0.0117812	0.156708	0.773369	0.0581416
JCVISYN3A_0249	MMSYN1_0249	CDS	0249	Uncharacterized protein		Unclear	No Kegg ortholog	Function unknown	???				151759	152338	579	-1	Essential			Essential	13	0.0224525	9	0.015544	6	0.0103627	0.726992	0.269287	0.0010056	0.00271481
JCVISYN3A_0250	MMSYN1_0250	CDS	0250	Uncharacterized protein		Unclear	No Kegg ortholog	Function unknown	???				152340	153030	690	-1	Nonessential	Nonessential		Nonessential	27	0.0391304	15	0.0217391	15	0.0217391	1.31583e-13	6.53784e-09	0.99998	2.01259e-05
JCVISYN3A_0253	MMSYN1_0253	CDS	greA	Transcription elongation factor	K03624	Genetic Information Processing	Transcription	Transcription machinery	greA; transcription elongation factor GreA				153155	153629	474	-1	Essential			Essential	12	0.0253165	2	0.00421941	2	0.00421941	0.999999	1.30696e-07	9.26986e-14	7.09267e-07
JCVISYN3A_0254	MMSYN1_0254	CDS	uvrC	Excinuclease ABC subunit C	K03703	Genetic Information Processing	DNA Maintenance	Nucleotide excision repair	uvrC; excinuclease ABC subunit C				153751	155506	1755	-1	Quasiessential			Quasiessential	110	0.0626781	62	0.0353276	22	0.0125356	7.14762e-42	0.91951	0.0804899	6.25672e-43
JCVISYN3A_0257	MMSYN1_0257	CDS	rnjB	RNase J family beta-CASP ribonuclease	K12574	Genetic Information Processing	Folding, Sorting and Degradation	RNA degradation	rnj; ribonuclease J				155627	157379	1752	-1	Essential			Essential	2	0.00114155	3	0.00171233	0	0	1	0	0	0
JCVISYN3A_0259	MMSYN1_0259	CDS	nadK	NAD(+) kinase	K00858	Metabolism	Biosynthesis	Cofactor biosynthesis	ppnK, NADK; NAD+ kinase	NADK	Essential		157515	158313	798	-1	Essential			Essential	14	0.0175439	5	0.00626566	0	0	1	3.3585e-10	5.96589e-25	1.77636e-15
JCVISYN3A_0260	MMSYN1_0260	CDS	valRS	Valine--tRNA ligase	K01873	Genetic Information Processing	Translation	tRNA loading	VARS, valS; valyl-tRNA synthetase	VALTRS	Essential		158423	161042	2619	-1	Essential			Essential	24	0.0091638	5	0.00190913	0	0	1	0	0	0
JCVISYN3A_0262	MMSYN1_0262	CDS	rpe	Ribulose-phosphate 3-epimerase	K01783	Metabolism	Central Carbon Metabolism	Pentose phosphate metabolism	rpe, RPE; ribulose-phosphate 3-epimerase	RPE	Essential		161213	161891	678	-1	Quasiessential			Quasiessential	41	0.060472	22	0.0324484	7	0.0103245	4.02551e-14	0.998411	0.00158949	6.4087e-17
JCVISYN3A_0263	MMSYN1_0263	CDS	0263	Ribosome small subunit-dependent GTPase A	K06949	Genetic Information Processing	Translation	Ribosome biogenesis	rsgA, engC; ribosome biogenesis GTPase / thiamine phosphate phosphatase				161892	162795	903	-1	Quasiessential			Quasiessential	56	0.0620155	38	0.0420819	3	0.00332226	3.70843e-29	1	3.80918e-13	1.41261e-41
JCVISYN3A_0264	MMSYN1_0264	CDS	0264	Uncharacterized serine/threonine protein kinase	K12132	Metabolism	Other Enzymes	Protein kinases	prkC, stkP; eukaryotic-like serine/threonine-protein kinase				162804	163920	1116	-1	Nonessential	Quasiessential		Quasiessential	70	0.062724	55	0.0492832	40	0.0358423	3.41312e-81	2.75629e-36	1	1.2383e-45
JCVISYN3A_0270	MMSYN1_0270	CDS	tsaE	tRNA (N6-adenosine(37)-N6)-threonylcarbamoyltransferase complex ATPase	K06925	Genetic Information Processing	Translation	tRNA biogenesis	tsaE; tRNA threonylcarbamoyladenosine biosynthesis protein TsaE				164054	164471	417	1	Essential			Essential	4	0.00959233	1	0.00239808	0	0	1	1.00158e-07	1.17827e-15	1.17641e-08
JCVISYN3A_0271	MMSYN1_0271	CDS	tsaB	tRNA N6-adenosine(37)-N6-threonylcarbamoyltransferase complex dimerization subunit	K14742	Genetic Information Processing	Translation	tRNA biogenesis	tsaB; tRNA threonylcarbamoyladenosine biosynthesis protein TsaB				164472	165036	564	1	Essential			Essential	5	0.00886525	1	0.00177305	1	0.00177305	1	1.51008e-10	1.04994e-19	6.95287e-10
JCVISYN3A_0280	MMSYN1_0280	tRNA	Ser	tRNA-Ser	K14233	Genetic Information Processing	Non-coding RNA	tRNA	tRNA-Ser; tRNA Ser				165577	165667	90	1	Essential			Essential	0	0	0	0	0	0	0.980355	0.0114597	9.45757e-05	0.00809074
JCVISYN3A_0281	MMSYN1_0281	CDS	0281	Uncharacterized protein		Unclear	No Kegg ortholog	Function unknown	???				165786	166467	681	1	Essential			Essential	18	0.0264317	4	0.00587372	0	0	1	3.64984e-09	8.18532e-22	2.24265e-13
JCVISYN3A_0282	MMSYN1_0282	CDS	proRS	Proline--tRNA ligase	K01881	Genetic Information Processing	Translation	tRNA loading	PARS, proS; prolyl-tRNA synthetase	PROTRS	Essential		166447	167872	1425	1	Essential			Essential	6	0.00421053	0	0	0	0	1	1.11022e-16	0	0
JCVISYN3A_0283	MMSYN1_0283	CDS	rnhA	Double-stranded RNA binding RNase HI	K06993	Genetic Information Processing	DNA Maintenance	DNA replication complex	K06993; uncharacterized protein				167884	168502	618	1	Essential			Essential	34	0.0550162	7	0.0113269	2	0.00323625	0.999748	0.000251515	4.753e-13	1.88928e-09
JCVISYN3A_0285	MMSYN1_0285	CDS	lepA	Elongation factor 4	K03596	Genetic Information Processing	Translation	Translation factors	lepA; GTP-binding protein LepA				168526	170329	1803	1	Quasiessential			Quasiessential	155	0.0859678	95	0.05269	11	0.00610094	7.79503e-81	1	1.11022e-16	8.65422e-97
JCVISYN3A_0286	MMSYN1_0286	CDS	0286	Uncharacterized protein		Unclear	No Kegg ortholog	Function unknown	???				170354	171161	807	1	Essential			Essential	18	0.0223048	12	0.0148699	2	0.00247831	0.937851	0.062149	4.90861e-14	7.40727e-13
JCVISYN3A_0287	MMSYN1_0287	CDS	aspRS	Aspartate--tRNA ligase	K01876	Genetic Information Processing	Translation	tRNA loading	DARS, aspS; aspartyl-tRNA synthetase	ASPTRS	Essential		171177	172902	1725	-1	Essential			Essential	11	0.00637681	6	0.00347826	3	0.00173913	1	0	0	0
JCVISYN3A_0288	MMSYN1_0288	CDS	hisRS	Histidine--tRNA ligase	K01892	Genetic Information Processing	Translation	tRNA loading	HARS, hisS; histidyl-tRNA synthetase	HISTRS	Essential		172910	174155	1245	-1	Essential			Essential	8	0.0064257	1	0.000803213	0	0	1	0	0	0
JCVISYN3A_0289	MMSYN1_0289	CDS	rbfA	Ribosome-binding factor A	K02834	Genetic Information Processing	Translation	Ribosome biogenesis	rbfA; ribosome-binding factor A				174339	174693	354	1	Quasiessential			Quasiessential	17	0.0480226	11	0.0310734	0	0	4.9318e-07	0.999999	1.57348e-07	7.76011e-14
JCVISYN3A_0290	MMSYN1_0290	CDS	truB	tRNA pseudouridine(55) synthase	K03177	Genetic Information Processing	Translation	tRNA biogenesis	truB, PUS4, TRUB1; tRNA pseudouridine55 synthase				174742	175621	879	1	Nonessential	Quasiessential		Quasiessential	56	0.0637088	48	0.0546075	32	0.036405	2.58176e-70	2.51434e-29	1	1.02681e-41
JCVISYN3A_0291	MMSYN1_0291	CDS	ribF	FAD synthetase	K11753	Metabolism	Biosynthesis	Cofactor biosynthesis	ribF; riboflavin kinase / FMN adenylyltransferase	FMNAT	Essential		175607	176162	555	1	Essential			Essential	4	0.00720721	5	0.00900901	5	0.00900901	0.999585	1.55018e-05	6.19466e-09	0.000399443
JCVISYN3A_0294	MMSYN1_0294	CDS	rpsO	30S ribosomal protein S15	K02956	Genetic Information Processing	Translation	Ribosome	RP-S15, MRPS15, rpsO; small subunit ribosomal protein S15				176396	176663	267	1	Quasiessential			Quasiessential	10	0.0374532	7	0.0262172	3	0.011236	0.00066734	0.9173	0.0819731	5.96358e-05
JCVISYN3A_0295	MMSYN1_0295	tRNA	Gly	tRNA-Gly	K14225	Genetic Information Processing	Non-coding RNA	tRNA	tRNA-Gly; tRNA Gly				176722	176796	74	1	Essential			Essential	0	0	0	0	0	0	0.961508	0.0227964	0.00036351	0.0153321
JCVISYN3A_0296	MMSYN1_0296	CDS	0296	Uncharacterized protein		Unclear	No Kegg ortholog	Function unknown	???				176893	177538	645	1	Essential			Essential	14	0.0217054	5	0.00775194	4	0.00620155	0.999999	2.90402e-07	1.1376e-13	3.91732e-07
JCVISYN3A_0297	MMSYN1_0297	CDS	infB	Translation initiation factor IF-2	K02519	Genetic Information Processing	Translation	Translation factors	infB, MTIF2; translation initiation factor IF-2				177556	179419	1863	-1	Essential			Essential	27	0.0144928	3	0.00161031	1	0.000536769	1	1.11022e-16	0	0
JCVISYN3A_0298	MMSYN1_0298	CDS	0298	Uncharacterized L7Ae family protein		Unclear	No Kegg ortholog	Function unknown	???				179440	179740	300	-1	Quasiessential			Quasiessential	8	0.0266667	7	0.0233333	2	0.00666667	0.00311546	0.99597	0.000911582	2.85148e-06
JCVISYN3A_0299	MMSYN1_0299	CDS	0299	Uncharacterized protein	K07742	Unclear	Kegg ortholog defined	Function unknown	ylxR; uncharacterized protein				179726	180008	282	-1	Quasiessential			Quasiessential	17	0.0602837	14	0.0496454	1	0.0035461	4.80638e-12	0.999923	7.65022e-05	3.67727e-16
JCVISYN3A_0300	MMSYN1_0300	CDS	nusA	Transcription termination/antitermination protein NusA	K02600	Genetic Information Processing	Transcription	Transcription machinery	nusA; N utilization substance protein A				179988	181743	1755	-1	Essential			Essential	61	0.0347578	12	0.00683761	1	0.000569801	1	0	0	0
JCVISYN3A_0301	MMSYN1_0301	CDS	rimP	Ribosome assembly cofactor	K09748	Genetic Information Processing	Translation	Ribosome biogenesis	rimP; ribosome maturation factor RimP				181751	182246	495	-1	Quasiessential			Quasiessential	27	0.0545455	16	0.0323232	3	0.00606061	2.24393e-10	0.999993	7.49921e-06	1.68278e-15
JCVISYN3A_0302	MMSYN1_0302	CDS	fre	Flavin reductase	K05368	Metabolism	Biosynthesis	Cofactor biosynthesis	fre, ubiB; aquacobalamin reductase / NAD(P)H-flavin reductase				182358	183009	651	-1	Essential			Essential	6	0.00921659	0	0	1	0.0015361	1	1.99174e-13	3.85501e-24	1.9355e-11
JCVISYN3A_0303	MMSYN1_0303	CDS	polC	PolC-type DNA polymerase III	K03763	Genetic Information Processing	DNA Maintenance	DNA replication complex	DPO3A2, polC; DNA polymerase III subunit alpha, Gram-positive type				183021	187470	4449	-1	Essential			Essential	9	0.00202293	6	0.00134862	1	0.00022477	1	0	0	0
JCVISYN3A_0304	MMSYN1_0304	CDS	cdsA	Phosphatidate cytidylyltransferase	K00981	Metabolism	Biosynthesis	Lipid metabolism	E2.7.7.41, CDS1, CDS2, cdsA; phosphatidate cytidylyltransferase	DASYN	Essential		187478	188507	1029	-1	Essential			Essential	5	0.00485909	3	0.00291545	2	0.00194363	1	0	0	1.11022e-16
JCVISYN3A_0305	MMSYN1_0305	CDS	0305	Uncharacterized metallopeptidase	K01262	Genetic Information Processing	Folding, Sorting and Degradation	Peptidases	pepP; Xaa-Pro aminopeptidase	Peptidase 2	Nonessential	2.02442	188705	189782	1077	-1	Nonessential	Quasiessential		Quasiessential	117	0.108635	80	0.0742804	30	0.0278552	6.93733e-99	5.4893e-23	1	1.26379e-76
JCVISYN3A_0308	MMSYN1_0308	CDS	trpRS	Tryptophan--tRNA ligase	K01867	Genetic Information Processing	Translation	tRNA loading	WARS, trpS; tryptophanyl-tRNA synthetase	TRPTRS	Essential		190226	191237	1011	1	Essential			Essential	6	0.00593472	0	0	0	0	1	0	0	0
JCVISYN3A_0314	MMSYN1_0314	CDS	ecfS	Uncharacterized ECF transporter S component		Metabolism	Membrane Transport	Cofactor	???	NACabc	Essential		191372	192107	735	1	Essential			Essential	11	0.014966	4	0.00544218	0	0	1	3.35534e-10	8.15814e-24	2.43139e-14
JCVISYN3A_0315	MMSYN1_0315	CDS	0315	Uncharacterized protein		Unclear	No Kegg ortholog	Function unknown	???				192228	192381	153	1	Quasiessential			Quasiessential	6	0.0392157	4	0.0261438	2	0.0130719	0.014173	0.705937	0.274381	0.0055087
JCVISYN3A_0316	MMSYN1_0316	CDS	tkt	Transketolase	K00615	Metabolism	Central Carbon Metabolism	Pentose phosphate metabolism	E2.2.1.1, tktA, tktB; transketolase	TKT	Essential		192439	194410	1971	1	Nonessential	Quasiessential		Quasiessential	199	0.100964	109	0.0553019	36	0.0182648	3.20039e-109	2.11069e-15	1	1.51627e-94
JCVISYN3A_0317	MMSYN1_0317	CDS	0317	Uncharacterized protein	K09976	Unclear	Kegg ortholog defined	Function unknown	K09976; uncharacterized protein				194425	194671	246	1	Essential			Essential	3	0.0121951	1	0.00406504	0	0	0.999795	0.000191851	2.57412e-09	1.34146e-05
JCVISYN3A_0325	MMSYN1_0325	CDS	0325	Uncharacterized protein		Unclear	No Kegg ortholog	Function unknown	???				196093	197593	1500	1	Essential			Essential	26	0.0173333	1	0.000666667	1	0.000666667	1	0	0	0
JCVISYN3A_0326	MMSYN1_0326	CDS	0326	Uncharacterized protein		Unclear	No Kegg ortholog	Function unknown	???				197610	198372	762	1	Nonessential	Nonessential		Nonessential	46	0.0603675	35	0.0459318	38	0.0498688	2.52724e-67	8.1445e-40	1	3.103e-28
JCVISYN3A_0327	MMSYN1_0327	CDS	scpA	Chromosome segregation protein A	K05896	Genetic Information Processing	DNA Maintenance	Chromosome-related	scpA; segregation and condensation protein A				198381	199218	837	1	Essential			Essential	24	0.0286738	11	0.0131422	7	0.0083632	0.998913	0.00108461	2.48113e-09	2.2851e-06
JCVISYN3A_0328	MMSYN1_0328	CDS	scpB	Chromosome segregation protein B	K06024	Genetic Information Processing	DNA Maintenance	Chromosome-related	scpB; segregation and condensation protein B				199201	199831	630	1	Essential			Essential	22	0.0349206	6	0.00952381	2	0.0031746	0.999991	9.13325e-06	1.05316e-14	1.1531e-09
JCVISYN3A_0329	MMSYN1_0329	CDS	rluB	Uncharacterized pseudouridine synthase	K06178	Genetic Information Processing	Translation	Ribosome biogenesis	rluB; 23S rRNA pseudouridine2605 synthase				199898	200657	759	1	Nonessential	Quasiessential		Quasiessential	76	0.100132	49	0.0645586	30	0.0395257	3.57064e-73	1.13337e-28	1	3.15045e-45
JCVISYN3A_0330	MMSYN1_0330	CDS	dak1	Deoxyguanosine kinase	K15518	Metabolism	Central Carbon Metabolism	Nucleotide metabolism	dgk; deoxyguanosine kinase	dAdn kinase 1	Nonessential	2.02442	200666	201284	618	1	Nonessential	Nonessential		Nonessential	34	0.0550162	32	0.0517799	28	0.0453074	4.8941e-55	2.15222e-28	1	2.27398e-27
JCVISYN3A_0332	MMSYN1_0332	CDS	0332	Uncharacterized protein		Unclear	No Kegg ortholog	Function unknown	???				201394	202222	828	1	Quasiessential			Quasiessential	35	0.0422705	25	0.0301932	4	0.00483092	7.1726e-15	1	2.0958e-10	1.50323e-24
JCVISYN3A_0338	MMSYN1_0338	CDS	0338	Uncharacterized lipoprotein		Unclear	No Kegg ortholog	Function unknown	???				202896	203616	720	1	Essential			Essential	56	0.0777778	5	0.00694444	2	0.00277778	1	1.05527e-08	2.99387e-19	2.83705e-11
JCVISYN3A_0344	MMSYN1_0344	CDS	ppa	Inorganic diphosphatase	K01507	Metabolism	Energy Metabolism	Oxidative phosphorylation	ppa; inorganic pyrophosphatase	PPA	Essential		204073	204634	561	-1	Essential			Essential	9	0.0160428	1	0.00178253	0	0	1	1.72419e-10	5.40433e-21	3.13441e-11
JCVISYN3A_0345	MMSYN1_0345	CDS	ecfS	Uncharacterized ECF transporter S component		Metabolism	Membrane Transport	Cofactor	???	P5Pabc	Essential		204772	205663	891	1	Essential			Essential	18	0.020202	2	0.00224467	1	0.00112233	1	1.22125e-15	1.35585e-30	1.11022e-15
JCVISYN3A_0346	MMSYN1_0346	CDS	0346	Uncharacterized protein		Unclear	No Kegg ortholog	Function unknown	???				205728	206424	696	1	Nonessential	Nonessential		Nonessential	25	0.0359195	19	0.0272989	18	0.0258621	2.01331e-22	5.29398e-13	1	3.80302e-10
JCVISYN3A_0347	MMSYN1_0347	CDS	cmk	Cytidylate kinase	K00945	Metabolism	Central Carbon Metabolism	Nucleotide metabolism	cmk; CMP/dCMP kinase	CYTK	Essential		206432	207095	663	1	Quasiessential			Quasiessential	53	0.0799397	33	0.0497738	6	0.00904977	1.02522e-27	0.999882	0.000117604	1.20584e-31
JCVISYN3A_0348	MMSYN1_0348	CDS	engA	Ribosome biogenesis GTPase	K03977	Genetic Information Processing	Translation	Ribosome biogenesis	engA, der; GTPase				207101	208409	1308	1	Essential			Essential	8	0.00611621	1	0.000764526	0	0	1	0	0	0
JCVISYN3A_0350	MMSYN1_0350	CDS	hupA	DNA-binding protein	K03530	Genetic Information Processing	Transcription	Transcription factors	hupB; DNA-binding protein HU-beta				208463	208736	273	1	Essential			Essential	3	0.010989	2	0.00732601	0	0	0.999054	0.00094205	4.15948e-09	4.41117e-06
JCVISYN3A_0352	MMSYN1_0352	CDS	0352	Uncharacterized protein		Unclear	No Kegg ortholog	Function unknown	???				208790	209339	549	1	Essential			Essential	2	0.00364299	2	0.00364299	3	0.00546448	0.999999	4.74928e-09	3.85696e-15	8.12113e-07
JCVISYN3A_0353	MMSYN1_0353	CDS	0353	Uncharacterized protein		Unclear	No Kegg ortholog	Function unknown	???				209402	209780	378	1	Nonessential	Quasiessential		Quasiessential	20	0.0529101	13	0.0343915	9	0.0238095	2.34264e-14	4.31936e-06	0.999996	5.42355e-09
JCVISYN3A_0356	MMSYN1_0356	ncRNA	rnpB	RNase P RNA component class B	K01978	Genetic Information Processing	Non-coding RNA	Other RNA	rnpB; M1 RNA				210197	210537	340	1	Essential			Essential	5	0.0147059	1	0.00294118	1	0.00294118	0.99999	3.01096e-06	2.11592e-11	7.02732e-06
JCVISYN3A_0359	MMSYN1_0359	CDS	RNase Y	Ribonuclease Y	K18682	Genetic Information Processing	Folding, Sorting and Degradation	RNA degradation	rny; ribonucrease Y				210711	212241	1530	1	Essential			Essential	16	0.0104575	1	0.000653595	0	0	1	0	0	0
JCVISYN3A_0360	MMSYN1_0360	CDS	ffh	Signal recognition particle protein	K03106	Genetic Information Processing	Folding, Sorting and Degradation	Protein export	SRP54, ffh; signal recognition particle subunit SRP54				212274	213618	1344	1	Essential			Essential	23	0.0171131	1	0.000744048	1	0.000744048	1	0	0	0
JCVISYN3A_0361	MMSYN1_0361	CDS	rlmH	23S rRNA (pseudouridine(1915)-N3)-methyltransferase	K00783	Genetic Information Processing	Translation	Ribosome biogenesis	rlmH; 23S rRNA (pseudouridine1915-N3)-methyltransferase				213621	214089	468	1	Nonessential	Nonessential		Nonessential	18	0.0384615	14	0.0299145	12	0.025641	1.98446e-16	1.11044e-08	1	1.78709e-08
JCVISYN3A_0362	MMSYN1_0362	CDS	rpsP	30S ribosomal protein S16	K02959	Genetic Information Processing	Translation	Ribosome	RP-S16, MRPS16, rpsP; small subunit ribosomal protein S16				214179	214458	279	1	Essential			Essential	2	0.00716846	0	0	0	0	0.999994	2.75365e-06	9.49744e-12	3.44902e-06
JCVISYN3A_0363	MMSYN1_0363	CDS	rimM	16S rRNA processing protein	K02860	Genetic Information Processing	Translation	Ribosome biogenesis	rimM; 16S rRNA processing protein RimM				214489	214984	495	1	Essential			Essential	12	0.0242424	3	0.00606061	0	0	0.999999	8.37273e-07	3.97153e-16	4.74341e-10
JCVISYN3A_0364	MMSYN1_0364	CDS	trmD	tRNA (guanosine(37)-N1)-methyltransferase	K00554	Genetic Information Processing	Translation	tRNA biogenesis	trmD; tRNA (guanine37-N1)-methyltransferase				214985	215708	723	1	Essential			Essential	11	0.0152144	2	0.00276625	0	0	1	2.17115e-12	8.65356e-26	3.9857e-14
JCVISYN3A_0365	MMSYN1_0365	CDS	rplS	50S ribosomal protein L19	K02884	Genetic Information Processing	Translation	Ribosome	RP-L19, MRPL19, rplS; large subunit ribosomal protein L19				215709	216093	384	1	Essential			Essential	9	0.0234375	3	0.0078125	0	0	0.999887	0.000113104	5.17614e-12	4.57592e-08
JCVISYN3A_0366	MMSYN1_0366	CDS	ylqF	L16-binding dependent 50S subunit-maturation GTPase	K14540	Genetic Information Processing	Translation	Ribosome biogenesis	rbgA; ribosome biogenesis GTPase A				216191	217142	951	1	Essential			Essential	10	0.0105152	2	0.00210305	0	0	1	0	0	0
JCVISYN3A_0371	MMSYN1_0371	CDS	ywjA	Flippase A	K06147	Metabolism	Membrane Transport	Generic	ABCB-BAC; ATP-binding cassette, subfamily B, bacterial				217522	219394	1872	1	Essential			Essential	28	0.0149573	7	0.00373932	1	0.000534188	1	0	0	0
JCVISYN3A_0372	MMSYN1_0372	CDS	ywjA	Flippase B	K06147	Metabolism	Membrane Transport	Generic	ABCB-BAC; ATP-binding cassette, subfamily B, bacterial				219409	221263	1854	1	Essential			Essential	21	0.0113269	9	0.00485437	0	0	1	1.11022e-16	0	0
JCVISYN3A_0373	MMSYN1_0373	CDS	0373	Uncharacterized protein		Unclear	No Kegg ortholog	Function unknown	???				221296	222904	1608	1	Essential			Essential	8	0.00497512	2	0.00124378	0	0	1	0	0	0
JCVISYN3A_0374	MMSYN1_0374	tRNA	Arg	tRNA-Arg	K14219	Genetic Information Processing	Non-coding RNA	tRNA	tRNA-Arg; tRNA Arg				222959	223036	77	1	Essential			Essential	3	0.038961	1	0.012987	1	0.012987	0.552702	0.186003	0.065793	0.195501
JCVISYN3A_0375	MMSYN1_0375	CDS	0375	Uncharacterized protein		Unclear	No Kegg ortholog	Function unknown	???				223089	223830	741	1	Nonessential	Nonessential		Nonessential	31	0.0418354	18	0.0242915	21	0.0283401	9.61539e-24	2.13479e-16	1	4.50413e-08
JCVISYN3A_0376	MMSYN1_0376	CDS	0376	Uncharacterized protein		Unclear	No Kegg ortholog	Function unknown	???				223801	224146	345	1	Nonessential	Quasiessential		Quasiessential	13	0.0376812	10	0.0289855	5	0.0144928	1.64224e-06	0.305833	0.694161	3.72745e-06
JCVISYN3A_0377	MMSYN1_0377	CDS	obgE	Ribosome GTPase	K03979	Genetic Information Processing	Translation	Ribosome biogenesis	obgE, cgtA; GTPase				224216	225518	1302	1	Essential			Essential	19	0.0145929	1	0.000768049	1	0.000768049	1	0	0	0
JCVISYN3A_0378	MMSYN1_0378	CDS	nadE	NAD(+) synthase	K01916	Metabolism	Biosynthesis	Cofactor biosynthesis	nadE; NAD+ synthase	NADS	Essential		225519	226257	738	1	Essential			Essential	11	0.0149051	4	0.00542005	0	0	1	2.93867e-10	6.29679e-24	2.14273e-14
JCVISYN3A_0379	MMSYN1_0379	CDS	0379	Uncharacterized protein		Unclear	No Kegg ortholog	Function unknown	???				226273	226552	279	1	Essential			Essential	2	0.00716846	1	0.00358423	0	0	0.999952	4.46264e-05	1.53918e-10	3.44887e-06
JCVISYN3A_0380	MMSYN1_0380	CDS	nadD	Nicotinate (nicotinamide) nucleotide adenylyltransferase	K00969	Metabolism	Biosynthesis	Cofactor biosynthesis	nadD; nicotinate-nucleotide adenylyltransferase	NNATr	Essential		226569	227667	1098	1	Essential			Essential	27	0.0245902	5	0.00455373	2	0.00182149	1	5.55112e-16	6.16298e-32	1.11022e-16
JCVISYN3A_0381	MMSYN1_0381	CDS	mtnN	5'-Methylthioadenosine nucleosidase	K01243	Metabolism	Biosynthesis	Amino acid metabolism	mtnN, mtn, pfs; adenosylhomocysteine nucleosidase	AHCi	FBATechNoness		227671	228331	660	1	Nonessential	Nonessential		Nonessential	44	0.0666667	30	0.0454545	51	0.0772727	2.98098e-83	7.79782e-60	1	3.82284e-24
JCVISYN3A_0382	MMSYN1_0382	CDS	dak2	Deoxynucleoside kinase	K05961	Metabolism	Central Carbon Metabolism	Nucleotide metabolism	dnk; deoxynucleoside kinase	dAdn kinase 2	Nonessential	2.02442	228340	228979	639	1	Nonessential	Nonessential		Nonessential	49	0.0766823	36	0.056338	29	0.0453834	1.69729e-60	2.03553e-29	1	8.33832e-32
JCVISYN3A_0387	MMSYN1_0387	CDS	mnmA	tRNA 2-thiouridine(34) synthase	K00566	Genetic Information Processing	Translation	tRNA biogenesis	mnmA, trmU; tRNA-uridine 2-sulfurtransferase				229207	230335	1128	1	Essential			Essential	17	0.0150709	4	0.0035461	1	0.000886525	1	0	0	0
JCVISYN3A_0388	MMSYN1_0388	CDS	0388	Uncharacterized protein		Unclear	No Kegg ortholog	Function unknown	???				230381	230999	618	1	Essential			Essential	1	0.00161812	0	0	0	0	1	8.56426e-13	2.56922e-24	2.99993e-12
JCVISYN3A_0389	MMSYN1_0389	CDS	0389	Uncharacterized protein		Unclear	No Kegg ortholog	Function unknown	???				231074	233219	2145	1	Quasiessential			Quasiessential	91	0.0424242	55	0.025641	5	0.002331	6.99228e-26	1	0	0
JCVISYN3A_0390	MMSYN1_0390	CDS	fmt	Methionyl-tRNA formyltransferase	K00604	Genetic Information Processing	Translation	tRNA loading	MTFMT, fmt; methionyl-tRNA formyltransferase	FMETTRS	Essential		233208	234162	954	1	Quasiessential			Quasiessential	52	0.0545073	21	0.0220126	4	0.00419287	1.29739e-07	1	1.17151e-12	1.5199e-19
JCVISYN3A_0391	MMSYN1_0391	CDS	efp	Elongation factor P	K02356	Genetic Information Processing	Translation	Translation factors	efp; elongation factor P				234248	234803	555	1	Quasiessential			Quasiessential	59	0.106306	34	0.0612613	3	0.00540541	5.34675e-31	0.999999	6.3438e-07	3.39188e-37
JCVISYN3A_0392	MMSYN1_0392	CDS	0392	Uncharacterized protein		Unclear	No Kegg ortholog	Function unknown	???				234820	235123	303	1	Quasiessential			Quasiessential	13	0.0429043	6	0.019802	4	0.0132013	0.036247	0.626195	0.319088	0.0184703
JCVISYN3A_0394	MMSYN1_0394	CDS	lon	Endopeptidase La	K01338	Genetic Information Processing	Folding, Sorting and Degradation	Peptidases	lon; ATP-dependent Lon protease	Lon	Essential		235261	237622	2361	1	Quasiessential			Quasiessential	195	0.0825921	101	0.0427785	6	0.0025413	2.21051e-77	1	0	0
JCVISYN3A_0398	MMSYN1_0398	CDS	0398	Uncharacterized lipoprotein		Unclear	No Kegg ortholog	Function unknown	???				237759	240222	2463	-1	Quasiessential			Quasiessential	88	0.0357288	69	0.0280146	20	0.00812018	1.03003e-36	1	1.11022e-16	1.14356e-52
JCVISYN3A_0399	MMSYN1_0399	CDS	0399	Uncharacterized efflux ABC transporter permease		Metabolism	Membrane Transport	Generic	???				240371	245633	5262	1	Quasiessential			Quasiessential	283	0.0537818	186	0.0353478	48	0.00912201	1.60301e-124	1	1.11022e-16	1.7797e-140
JCVISYN3A_0400	MMSYN1_0400	CDS	0400	Uncharacterized protease	K03152	Genetic Information Processing	Translation	Ribosome biogenesis	thiJ; protein deglycase				245680	246232	552	1	Nonessential	Quasiessential		Quasiessential	43	0.0778986	24	0.0434783	8	0.0144928	7.18554e-20	0.122727	0.877273	5.13637e-19
JCVISYN3A_0401	MMSYN1_0401	CDS	0401	Uncharacterized peptidase		Metabolism	Membrane Transport	Amino acid and peptides	???	LIPTA	Nonessential	2.02442	246266	248114	1848	1	Nonessential	Nonessential		Nonessential	52	0.0281385	50	0.0270563	50	0.0270563	5.27994e-62	3.39201e-37	1	1.55658e-25
JCVISYN3A_0402	MMSYN1_0402	CDS	ybeY	rRNA maturation RNase	K07042	Genetic Information Processing	Translation	Ribosome biogenesis	ybeY, yqfG; probable rRNA maturation factor				248118	248613	495	1	Essential			Essential	8	0.0161616	0	0	0	0	1	1.96681e-10	9.32939e-20	4.74341e-10
JCVISYN3A_0403	MMSYN1_0403	CDS	era	Ribosome GTPase	K03595	Genetic Information Processing	Translation	Ribosome biogenesis	era, ERAL1; GTPase				248616	249522	906	1	Essential			Essential	27	0.0298013	7	0.00772627	1	0.00110375	1	7.45545e-10	4.96633e-25	6.66134e-16
JCVISYN3A_0404	MMSYN1_0404	CDS	recO	DNA repair protein	K03584	Genetic Information Processing	DNA Maintenance	Homologous recombination	recO; DNA repair protein RecO (recombination protein O)				249521	250271	750	1	Nonessential	Nonessential		Nonessential	34	0.0453333	21	0.028	20	0.0266667	1.22225e-25	7.76066e-15	1	1.57493e-11
JCVISYN3A_0405	MMSYN1_0405	CDS	glyRS	Glycine--tRNA ligase	K01880	Genetic Information Processing	Translation	tRNA loading	GARS, glyS1; glycyl-tRNA synthetase	GLYTRS	Essential		250334	251705	1371	1	Essential			Essential	4	0.00291758	1	0.000729395	0	0	1	0	0	0
JCVISYN3A_0406	MMSYN1_0406	CDS	dnaG	DNA primase	K02316	Genetic Information Processing	DNA Maintenance	DNA replication complex	dnaG; DNA primase				251739	253578	1839	1	Essential			Essential	7	0.00380642	2	0.00108755	0	0	1	0	0	0
JCVISYN3A_0407	MMSYN1_0407	CDS	rpoD	RNA polymerase subunit sigma	K03086	Genetic Information Processing	Transcription	Transcription machinery	SIG1, rpoD; RNA polymerase primary sigma factor				253580	255101	1521	1	Essential			Essential	11	0.00723208	3	0.00197239	2	0.00131492	1	0	0	0
JCVISYN3A_0408	MMSYN1_0408	CDS	trmK	Uncharacterized methyltransferase	K06967	Genetic Information Processing	Translation	tRNA biogenesis	trmK; tRNA (adenine22-N1)-methyltransferase				255100	255778	678	1	Nonessential	Quasiessential		Quasiessential	39	0.0575221	28	0.0412979	21	0.0309735	3.55103e-38	1.59608e-17	1	2.22485e-21
JCVISYN3A_0409	MMSYN1_0409	CDS	0409	Uncharacterized protein		Unclear	No Kegg ortholog	Function unknown	???				255764	256541	777	1	Nonessential	Quasiessential		Quasiessential	23	0.029601	24	0.030888	11	0.014157	1.04019e-15	0.0852485	0.914752	1.11617e-14
JCVISYN3A_0410	MMSYN1_0410	CDS	0410	Uncharacterized helicase	K18692	Genetic Information Processing	Translation	Ribosome biogenesis	cshB; ATP-dependent RNA helicase CshB				256549	257911	1362	1	Quasiessential			Quasiessential	71	0.0521292	54	0.0396476	6	0.00440529	1.05811e-39	1	0	0
JCVISYN3A_0411	MMSYN1_0411	CDS	0411	Uncharacterized protein		Unclear	No Kegg ortholog	Function unknown	???				257950	259465	1515	1	Nonessential	Nonessential		Nonessential	85	0.0561056	78	0.0514851	93	0.0613861	2.0944e-168	2.46895e-103	1	8.48295e-66
JCVISYN3A_0412	MMSYN1_0412	CDS	0412	Uncharacterized protein		Unclear	No Kegg ortholog	Function unknown	???				259580	263735	4155	1	Essential			Essential	11	0.00264741	0	0	0	0	1	0	0	0
JCVISYN3A_0413	MMSYN1_0413	CDS	apt	Adenine phosphoribosyltransferase	K00759	Metabolism	Central Carbon Metabolism	Nucleotide metabolism	APRT, apt; adenine phosphoribosyltransferase	ADPT	Essential		263746	264259	513	1	Essential			Essential	4	0.00779727	0	0	1	0.00194932	1	8.87667e-11	5.03712e-19	5.67457e-09
JCVISYN3A_0414	MMSYN1_0414	CDS	relA	Guanosine-3',5'-bis(diphosphate) 3'-pyrophosphohydrolase	K00951	Metabolism	Central Carbon Metabolism	Nucleotide metabolism	relA; GTP pyrophosphokinase				264341	266606	2265	1	Nonessential	Quasiessential		Quasiessential	167	0.0737307	118	0.0520971	72	0.0317881	1.34958e-159	1.56087e-60	1	8.64634e-100
JCVISYN3A_0415	MMSYN1_0415	CDS	smc	Chromosome segregation protein	K03529	Genetic Information Processing	DNA Maintenance	Chromosome-related	smc; chromosome segregation protein				266642	269609	2967	-1	Essential			Essential	44	0.0148298	8	0.00269633	0	0	1	0	0	0
JCVISYN3A_0416	MMSYN1_0416	CDS	0416	Uncharacterized protein		Unclear	No Kegg ortholog	Function unknown	???				269914	270304	390	-1	Quasiessential			Quasiessential	11	0.0282051	8	0.0205128	4	0.0102564	0.0100592	0.975954	0.013844	0.000142691
JCVISYN3A_0418	MMSYN1_0418	CDS	RNase III	Ribonuclease III	K03685	Genetic Information Processing	Translation	Ribosome biogenesis	rnc, DROSHA, RNT1; ribonuclease III				270448	271147	699	-1	Essential			Essential	23	0.0329041	6	0.00858369	0	0	1	4.32678e-07	4.62115e-20	1.06803e-13
JCVISYN3A_0419	MMSYN1_0419	CDS	plsX	Phosphate acyltransferase	K03621	Metabolism	Biosynthesis	Lipid metabolism	plsX; glycerol-3-phosphate acyltransferase PlsX	ACPPAT	Essential		271136	272141	1005	-1	Essential			Essential	16	0.0159204	2	0.00199005	0	0	1	0	0	0
JCVISYN3A_0420	MMSYN1_0420	CDS	fakA	Fatty acid kinase subunit A	K07030	Metabolism	Biosynthesis	Lipid metabolism	K07030; uncharacterized protein	FAKr	Essential		272173	273817	1644	-1	Essential			Essential	39	0.0237226	5	0.00304136	1	0.000608273	1	1.11022e-16	0	0
JCVISYN3A_0421	MMSYN1_0421	CDS	0421	Uncharacterized protein		Unclear	No Kegg ortholog	Function unknown	???				273841	274153	312	-1	Quasiessential			Quasiessential	19	0.0608974	8	0.025641	4	0.0128205	0.000242582	0.73951	0.260163	8.53414e-05
JCVISYN3A_0422	MMSYN1_0422	CDS	rpmB	50S ribosomal protein L28	K02902	Genetic Information Processing	Translation	Ribosome	RP-L28, MRPL28, rpmB; large subunit ribosomal protein L28				274321	274519	198	1	Nonessential	Quasiessential		Quasiessential	24	0.121212	14	0.0707071	10	0.0505051	1.22245e-23	1.04177e-10	1	1.17344e-13
JCVISYN3A_0423	MMSYN1_0423	tRNA	Leu	tRNA-Leu	K14228	Genetic Information Processing	Non-coding RNA	tRNA	tRNA-Leu; tRNA Leu				274582	274667	85	1	Essential			Essential	2	0.0235294	1	0.0117647	0	0	0.800745	0.189218	0.00191848	0.00811873
JCVISYN3A_0424	MMSYN1_0424	CDS	0424	Uncharacterized protein		Unclear	No Kegg ortholog	Function unknown	???				274749	275193	444	1	Essential			Essential	12	0.027027	5	0.0112613	5	0.0112613	0.960864	0.00201319	7.76169e-05	0.0370454
JCVISYN3A_0425	MMSYN1_0425	CDS	pstS	Phosphate ABC transporter substrate-binding protein	K02040	Metabolism	Membrane Transport	Inorganic	pstS; phosphate transport system substrate-binding protein	PIabc	Essential		275281	276412	1131	1	Essential			Essential	6	0.00530504	0	0	0	0	1	0	0	0
JCVISYN3A_0426	MMSYN1_0426	CDS	pstA	Phosphate ABC transporter permease	K08483	Metabolism	Membrane Transport	Carbohydrates	PTS-EI.PTSI, ptsI; phosphotransferase system, enzyme I, PtsI	PIabc	Essential		276463	278554	2091	1	Essential			Essential	5	0.0023912	1	0.00047824	0	0	1	0	0	0
JCVISYN3A_0427	MMSYN1_0427	CDS	pstB	Phosphate ABC transporter ATP-binding protein	K02036	Metabolism	Membrane Transport	Inorganic	pstB; phosphate transport system ATP-binding protein	PIabc	Essential		278546	279356	810	1	Essential			Essential	17	0.0209877	3	0.0037037	0	0	1	7.52176e-13	7.51575e-28	9.99201e-16
JCVISYN3A_0428	MMSYN1_0428	CDS	phoU	Phosphate transport system regulatory protein	K02039	Metabolism	Membrane Transport	Inorganic	phoU; phosphate transport system protein				279364	280039	675	1	Essential			Essential	16	0.0237037	4	0.00592593	3	0.00444444	1	4.75822e-09	2.16002e-17	4.53954e-09
JCVISYN3A_0429	MMSYN1_0429	CDS	ftsY	Signal recognition particle-docking protein	K03110	Genetic Information Processing	Folding, Sorting and Degradation	Protein export	ftsY; fused signal recognition particle receptor				280105	281335	1230	1	Essential			Essential	7	0.00569106	2	0.00162602	2	0.00162602	1	0	0	0
JCVISYN3A_0430	MMSYN1_0430	CDS	0430	Uncharacterized DNA-binding protein	K09787	Unclear	Kegg ortholog defined	Function unknown	K09787; uncharacterized protein				281318	281660	342	1	Essential			Essential	13	0.0380117	3	0.00877193	2	0.00584795	0.999114	0.000723332	1.17495e-07	0.000162292
JCVISYN3A_0431	MMSYN1_0431	CDS	0431	Uncharacterized metallophosphoesterase	K09769	Unclear	Kegg ortholog defined	Function unknown	K09769; uncharacterized protein				281647	282421	774	1	Essential			Essential	21	0.0271318	4	0.00516796	3	0.00387597	1	5.98586e-11	4.61567e-21	7.71097e-11
JCVISYN3A_0933		misc_binding	SAM-I	SAM riboswitch class I		Unclear	No Kegg ortholog	Function unknown	???				282461	282557	96	1	Nonessential	Nonessential		Nonessential	16	0.166667	13	0.135417	12	0.125	5.20246e-29	2.48285e-15	1	2.09536e-14
JCVISYN3A_0432	MMSYN1_0432	CDS	metK	Methionine adenosyltransferase	K00789	Metabolism	Biosynthesis	Amino acid metabolism	metK; S-adenosylmethionine synthetase	MAT	FBATechNoness		282630	283794	1164	1	Essential			Essential	24	0.0206186	7	0.00601375	10	0.00859107	1	8.32667e-15	4.29271e-22	5.15538e-08
JCVISYN3A_0433	MMSYN1_0433	CDS	cutC	Uncharacterized protein	K06201	Metabolism	Energy Metabolism	Other	cutC; copper homeostasis protein				283784	284468	684	1	Nonessential	Nonessential		Nonessential	60	0.0877193	49	0.0716374	60	0.0877193	6.06729e-118	5.29977e-72	1	1.14482e-46
JCVISYN3A_0434	MMSYN1_0434	CDS	RlmFO	23S rRNA (uridine(1939)-m5)-methyltransferase	K04094	Genetic Information Processing	Translation	tRNA biogenesis	trmFO, gid; methylenetetrahydrofolate--tRNA-(uracil-5-)-methyltransferase				284460	285777	1317	1	Nonessential	Nonessential		Nonessential	138	0.104784	103	0.078208	97	0.0736522	1.37881e-211	1.79529e-112	1	7.68015e-100
JCVISYN3A_0435	MMSYN1_0435	CDS	manA	Mannose-6-phosphate isomerase	K01809	Metabolism	Central Carbon Metabolism	Carbohydrate metabolism	manA, MPI; mannose-6-phosphate isomerase	MAN6PI	Nonessential	2.02442	285802	286732	930	1	Nonessential	Nonessential		Nonessential	84	0.0903226	71	0.0763441	63	0.0677419	1.2319e-139	8.38052e-72	1	1.46996e-68
JCVISYN3A_0437	MMSYN1_0437	CDS	yhaM	Putative 3'-5' exoribonuclease	K03698	Genetic Information Processing	Folding, Sorting and Degradation	RNA degradation	cbf, cbf1; 3'-5' exoribonuclease				286804	287785	981	1	Essential			Essential	6	0.00611621	1	0.00101937	1	0.00101937	1	1.11022e-16	0	0
JCVISYN3A_0438	MMSYN1_0438	CDS	hinT	Uncharacterized protein	K02503	Metabolism	Central Carbon Metabolism	Nucleotide metabolism	HINT1, hinT, hit; histidine triad (HIT) family protein				287815	288214	399	-1	Nonessential	Nonessential		Nonessential	24	0.0601504	17	0.0426065	21	0.0526316	3.26378e-35	1.64113e-22	1	1.98874e-13
JCVISYN3A_0439	MMSYN1_0439	CDS	0439	Uncharacterized lipoprotein		Unclear	No Kegg ortholog	Function unknown	???				288216	290373	2157	-1	Essential			Essential	36	0.0166898	8	0.00370885	1	0.000463607	1	0	0	0
JCVISYN3A_0440	MMSYN1_0440	CDS	0440	Uncharacterized lipoprotein		Unclear	No Kegg ortholog	Function unknown	???				290372	293309	2937	-1	Essential			Essential	59	0.0200885	18	0.0061287	8	0.00272387	1	0	0	1.11022e-16
JCVISYN3A_0441	MMSYN1_0441	CDS	iscS	Cysteine desulfurase	K11717	Metabolism	Biosynthesis	Amino acid metabolism	sufS; cysteine desulfurase / selenocysteine lyase				293511	294750	1239	1	Essential			Essential	14	0.0112994	2	0.00161421	0	0	1	1.11022e-16	0	0
JCVISYN3A_0442	MMSYN1_0442	CDS	iscU	Iron-sulfur cluster assembly scaffold protein	K04488	Metabolism	Energy Metabolism	Other	iscU, nifU; nitrogen fixation protein NifU and related proteins				294752	295190	438	1	Essential			Essential	3	0.00684932	0	0	0	0	1	2.44278e-09	1.21063e-17	4.95594e-09
JCVISYN3A_0443	MMSYN1_0443	CDS	ygfA	5-Formyltetrahydrofolate cyclo-ligase	K01934	Metabolism	Central Carbon Metabolism	Other central metabolism enzymes	MTHFS; 5-formyltetrahydrofolate cyclo-ligase	FTHFCL	Essential		295182	295746	564	1	Essential			Essential	15	0.0265957	9	0.0159574	0	0	0.581799	0.418201	1.15853e-11	1.61173e-11
JCVISYN3A_0444	MMSYN1_0444	CDS	0444	Uncharacterized peptidase	K07386	Genetic Information Processing	Folding, Sorting and Degradation	Peptidases	pepO; putative endopeptidase	Peptidase 3	Nonessential	2.02442	295766	297662	1896	1	Nonessential	Quasiessential		Quasiessential	100	0.0527426	63	0.0332278	37	0.0195148	9.3619e-58	3.8366e-18	1	2.44015e-40
JCVISYN3A_0445	MMSYN1_0445	CDS	pgi	Glucose-6-phosphate isomerase	K01810	Metabolism	Central Carbon Metabolism	Glycolysis	GPI, pgi; glucose-6-phosphate isomerase	PGI	Essential		297881	299165	1284	1	Essential			Essential	20	0.0155763	4	0.00311526	0	0	1	1.11022e-16	0	0
JCVISYN3A_0447	MMSYN1_0447	CDS	dut	dUTP diphosphatase	K01520	Genetic Information Processing	DNA Maintenance	DNA repair and recombination proteins	dut, DUT; dUTP pyrophosphatase	DUTPDP	Essential		299197	299701	504	1	Essential			Essential	2	0.00396825	3	0.00595238	4	0.00793651	0.99987	5.62412e-07	7.30828e-11	0.000129928
JCVISYN3A_0448	MMSYN1_0448	CDS	0448	Uncharacterized rRNA methyltransferase	K03437	Genetic Information Processing	Translation	tRNA biogenesis	spoU; RNA methyltransferase, TrmH family				299717	300485	768	1	Essential			Essential	5	0.00651042	4	0.00520833	3	0.00390625	1	7.80364e-11	7.70322e-21	9.87133e-11
JCVISYN3A_0451	MMSYN1_0451	CDS	gapdh	Glyceraldehyde-3-phosphate dehydrogenase	K00131	Metabolism	Central Carbon Metabolism	Glycolysis	gapN; glyceraldehyde-3-phosphate dehydrogenase (NADP+)	GAPDP	Nonessential	2.02442	300655	302071	1416	1	Essential			Essential	33	0.0233051	3	0.00211864	1	0.000706215	1	0	0	0
JCVISYN3A_0452	MMSYN1_0452	CDS	parE	DNA topoisomerase IV subunit B	K02622	Genetic Information Processing	DNA Maintenance	DNA replication control	parE; topoisomerase IV subunit B				302257	304189	1932	1	Essential			Essential	20	0.010352	1	0.000517598	2	0.0010352	1	0	0	0
JCVISYN3A_0453	MMSYN1_0453	CDS	parC	DNA topoisomerase IV subunit A	K02621	Genetic Information Processing	DNA Maintenance	DNA replication control	parC; topoisomerase IV subunit A				304190	306887	2697	1	Essential			Essential	22	0.00815721	2	0.000741565	0	0	1	0	0	1.11022e-16
JCVISYN3A_0475	MMSYN1_0475	CDS	ldh	L-lactate dehydrogenase	K00016	Metabolism	Central Carbon Metabolism	Glycolysis	LDH, ldh; L-lactate dehydrogenase	LDH_L	Nonessential	2.02442	307122	308079	957	-1	Essential			Essential	19	0.0198537	3	0.0031348	2	0.00208986	1	1.22125e-15	2.03378e-30	1.66533e-15
JCVISYN3A_0478	MMSYN1_0478	CDS	0478	Uncharacterized protein		Unclear	No Kegg ortholog	Function unknown	???				308181	308766	585	-1	Essential			Essential	10	0.017094	5	0.00854701	2	0.0034188	0.999996	4.11819e-06	3.02747e-14	7.35142e-09
JCVISYN3A_0479	MMSYN1_0479	CDS	0479	Uncharacterized peptidase		Genetic Information Processing	Folding, Sorting and Degradation	Peptidases	???	Peptidase 4	Nonessential	2.02442	308770	310417	1647	-1	Quasiessential			Quasiessential	67	0.04068	48	0.0291439	12	0.00728597	5.667e-27	1	7.52731e-14	4.26573e-40
JCVISYN3A_0481	MMSYN1_0481	CDS	0481	Uncharacterized lipoprotein		Unclear	No Kegg ortholog	Function unknown	???				310639	311077	438	-1	Nonessential	Nonessential		Nonessential	38	0.086758	27	0.0616438	33	0.0753425	1.16637e-62	1.30818e-38	1	8.91602e-25
JCVISYN3A_0482	MMSYN1_0482	CDS	rpsU	30S ribosomal protein S21	K02970	Genetic Information Processing	Translation	Ribosome	RP-S21, MRPS21, rpsU; small subunit ribosomal protein S21				311390	311555	165	1	Essential			Essential	2	0.0121212	1	0.00606061	2	0.0121212	0.802772	0.0055265	0.0013107	0.190391
JCVISYN3A_0154	MMSYN1_0493	CDS	0493	Uncharacterized peptidase	K01255	Genetic Information Processing	Folding, Sorting and Degradation	Peptidases	CARP, pepA; leucyl aminopeptidase	AGDC	Nonessential	2.02442	311815	313171	1356	1	Quasiessential			Quasiessential	138	0.10177	75	0.0553097	13	0.00958702	3.20351e-65	1	3.01057e-07	9.64437e-72
JCVISYN3A_0493		CDS	0493(3A)	Uncharacterized peptidase		Unclear	No Kegg ortholog	Function unknown	???				313334	314684	1350	-1	Quasiessential			Quasiessential	89	0.0659259	26	0.0192593	0	0	4.63268e-06	0.999995	1.11022e-16	5.14331e-22
JCVISYN3A_0494	MMSYN1_0494	CDS	nanE	N-acetylmannosamine-6-phosphate 2-epimerase	K01788	Metabolism	Central Carbon Metabolism	Other central metabolism enzymes	nanE; N-acylglucosamine-6-phosphate 2-epimerase	AMANPEr	Nonessential	2.02442	314839	315520	681	-1	Nonessential	Nonessential		Nonessential	65	0.0954479	44	0.0646109	48	0.0704846	3.28092e-95	2.92641e-55	1	1.12114e-40
JCVISYN3A_0495	MMSYN1_0495	CDS	0495	Uncharacterized kinase	K00885	Metabolism	Central Carbon Metabolism	Other central metabolism enzymes	nanK; N-acylmannosamine kinase	AMANK	Nonessential	2.02442	315578	316454	876	-1	Nonessential	Nonessential		Nonessential	54	0.0616438	39	0.0445205	31	0.0353881	3.86949e-58	5.57743e-28	1	6.93777e-31
JCVISYN3A_0499	MMSYN1_0499	CDS	rpmA	50S ribosomal protein L27	K02899	Genetic Information Processing	Translation	Ribosome	RP-L27, MRPL27, rpmA; large subunit ribosomal protein L27				316628	316910	282	-1	Unclassifiable		Essential	Essential	9	0.0319149	5	0.0177305	4	0.0141844	0.122426	0.330148	0.399341	0.148085
JCVISYN3A_0500	MMSYN1_0500	CDS	prp	Maturation protease for ribosomal protein L27	K07584	Genetic Information Processing	Translation	Ribosome biogenesis	ysxB; uncharacterized protein				316911	317226	315	-1	Essential			Essential	2	0.00634921	1	0.0031746	0	0	0.99999	9.09042e-06	7.12329e-12	7.83597e-07
JCVISYN3A_0501	MMSYN1_0501	CDS	rplU	50S ribosomal protein L21	K02888	Genetic Information Processing	Translation	Ribosome	RP-L21, MRPL21, rplU; large subunit ribosomal protein L21				317228	317531	303	-1	Essential			Essential	1	0.00330033	0	0	0	0	0.999998	9.53294e-07	1.22422e-12	1.28419e-06
JCVISYN3A_0503	MMSYN1_0503	CDS	0503	Uncharacterized protein		Unclear	No Kegg ortholog	Function unknown	???				317676	318078	402	-1	Quasiessential			Quasiessential	16	0.039801	8	0.0199005	5	0.0124378	0.0141436	0.807387	0.175397	0.00307255
JCVISYN3A_0504	MMSYN1_0504	CDS	rsmI	16S rRNA (cytidine(1402)-2'-O)-methyltransferase	K07056	Genetic Information Processing	Translation	Ribosome biogenesis	rsmI; 16S rRNA (cytidine1402-2'-O)-methyltransferase				318100	318988	888	-1	Nonessential	Nonessential		Nonessential	28	0.0315315	19	0.0213964	15	0.0168919	4.1767e-11	2.26589e-05	0.999975	1.84325e-06
JCVISYN3A_0930		CDS	rpmG	50S ribosomal protein L33	K02913	Genetic Information Processing	Translation	Ribosome	RP-L33, MRPL33, rpmG; large subunit ribosomal protein L33				319047	319191	144	-1	Nonessential	Nonessential		Nonessential	20	0.138889	9	0.0625	7	0.0486111	2.15144e-15	1.7836e-07	1	1.20623e-08
JCVISYN3A_0505	MMSYN1_0505	CDS	0505	Uncharacterized lipoprotein		Unclear	No Kegg ortholog	Function unknown	???				319363	320437	1074	1	Nonessential	Nonessential		Nonessential	67	0.0623836	32	0.0297952	33	0.0307263	3.95115e-45	3.06871e-27	1	1.28756e-18
JCVISYN3A_0506	MMSYN1_0506	tRNA	Leu	tRNA-Leu	K14228	Genetic Information Processing	Non-coding RNA	tRNA	tRNA-Leu; tRNA Leu				320529	320618	89	-1	Essential			Essential	1	0.011236	0	0	1	0.011236	0.812551	0.00992745	0.00214271	0.175378
JCVISYN3A_0507	MMSYN1_0507	tRNA	Lys	tRNA-Lys	K14229	Genetic Information Processing	Non-coding RNA	tRNA	tRNA-Lys; tRNA Lys				320628	320704	76	-1	Essential			Essential	0	0	0	0	1	0.0131579	0.715161	0.0155213	0.00572089	0.263597
JCVISYN3A_0508	MMSYN1_0508	tRNA	Gln	tRNA-Gln	K14223	Genetic Information Processing	Non-coding RNA	tRNA	tRNA-Gln; tRNA Gln				320708	320783	75	-1	Essential			Essential	2	0.0266667	1	0.0133333	0	0	0.720167	0.264761	0.00405159	0.0110206
JCVISYN3A_0509	MMSYN1_0509	tRNA	Tyr	tRNA-Tyr	K14236	Genetic Information Processing	Non-coding RNA	tRNA	tRNA-Tyr; tRNA Tyr				320789	320873	84	-1	Essential			Essential	2	0.0238095	0	0	0	0	0.974692	0.0148535	0.000156928	0.0102977
JCVISYN3A_0510	MMSYN1_0510	tRNA	Thr	tRNA-Thr	K14234	Genetic Information Processing	Non-coding RNA	tRNA	tRNA-Thr; tRNA Thr				320879	320955	76	-1	Essential			Essential	0	0	0	0	0	0	0.964592	0.0209347	0.000307441	0.0141657
JCVISYN3A_0511	MMSYN1_0511	CDS	0511	Uncharacterized protein		Unclear	No Kegg ortholog	Function unknown	???				321081	321705	624	-1	Essential			Essential	7	0.0112179	5	0.00801282	0	0	0.999999	7.3468e-07	1.72161e-18	2.34335e-12
JCVISYN3A_0512	MMSYN1_0512	CDS	plsC	Acyl-phosphate glycerol 3-phosphate acyltransferase	K00655	Metabolism	Biosynthesis	Lipid metabolism	plsC; 1-acyl-sn-glycerol-3-phosphate acyltransferase	AGPAT	Essential		321753	322701	948	-1	Essential			Essential	5	0.00527426	0	0	0	0	1	1.11022e-16	0	0
JCVISYN3A_0513	MMSYN1_0513	CDS	acpS	ACP synthase	K00997	Metabolism	Biosynthesis	Lipid metabolism	acpS; holo-[acyl-carrier protein] synthase	ACPS	Essential		322857	323190	333	-1	Essential			Essential	10	0.03003	0	0	1	0.003003	0.99999	2.53145e-07	2.37306e-12	9.37421e-06
JCVISYN3A_0515	MMSYN1_0515	CDS	dctD	Cytidine deaminase	K01493	Metabolism	Central Carbon Metabolism	Nucleotide metabolism	comEB; dCMP deaminase	DCMPDA	Nonessential	2.02442	323249	323732	483	-1	Quasiessential			Quasiessential	52	0.10766	38	0.0786749	6	0.0124224	2.69228e-37	0.837308	0.162692	5.23118e-38
JCVISYN3A_0516	MMSYN1_0516	CDS	0516	Uncharacterized protein		Unclear	No Kegg ortholog	Function unknown	???				323734	325036	1302	-1	Quasiessential			Quasiessential	72	0.0552995	42	0.0322581	1	0.000768049	2.45043e-26	1	0	0
JCVISYN3A_0517	MMSYN1_0517	CDS	rluD	Uncharacterized RNA pseudouridine synthase	K06180	Genetic Information Processing	Translation	Ribosome biogenesis	rluD; 23S rRNA pseudouridine1911/1915/1917 synthase				325028	325961	933	-1	Nonessential	Nonessential		Nonessential	73	0.0782422	57	0.0610932	47	0.0503751	3.4033e-100	2.35064e-49	1	1.44782e-51
JCVISYN3A_0518	MMSYN1_0518	CDS	lspA	Lipoprotein signal peptidase	K03101	Genetic Information Processing	Folding, Sorting and Degradation	Protein export	lspA; signal peptidase II				325941	326550	609	-1	Essential			Essential	30	0.0492611	9	0.0147783	2	0.00328407	0.910446	0.0895542	2.45127e-10	2.49207e-09
JCVISYN3A_0519	MMSYN1_0519	CDS	ileRS	Isoleucine--tRNA ligase	K01870	Genetic Information Processing	Translation	tRNA loading	IARS, ileS; isoleucyl-tRNA synthetase	ILETRS	Essential		326540	329288	2748	-1	Essential			Essential	6	0.00218341	0	0	0	0	1	0	0	1.11022e-16
JCVISYN3A_0520	MMSYN1_0520	CDS	0520	Uncharacterized hydrolase	K06889	Unclear	Kegg ortholog defined	Function unknown	K06889; uncharacterized protein				329980	330970	990	-1	Nonessential	Nonessential		Nonessential	51	0.0515152	35	0.0353535	43	0.0434343	7.19556e-66	9.74524e-43	1	7.38366e-24
JCVISYN3A_0521	MMSYN1_0521	CDS	sepF	Cell division protein	K09772	Cellular Processes	Cell Growth	Cell division	sepF; cell division inhibitor SepF				330982	331399	417	-1	Nonessential	Nonessential		Nonessential	43	0.103118	30	0.0719424	38	0.0911271	4.58129e-74	5.53375e-46	1	8.27882e-29
JCVISYN3A_0522	MMSYN1_0522	CDS	ftsZ	Cell division protein	K03531	Cellular Processes	Cell Growth	Cell division	ftsZ; cell division protein FtsZ				331410	332568	1158	-1	Nonessential	Nonessential		Nonessential	166	0.143351	131	0.113126	167	0.144214	0	2.7326e-213	1	9.15584e-137
JCVISYN3A_0523	MMSYN1_0523	CDS	ftsA	Cell division protein	K03590	Cellular Processes	Cell Growth	Cell division	ftsA; cell division protein FtsA				332682	333843	1161	-1	Nonessential	Nonessential		Nonessential	30	0.0258398	29	0.0249785	27	0.0232558	7.06367e-30	2.75538e-17	1	2.5636e-13
JCVISYN3A_0524	MMSYN1_0524	CDS	rsmH	16S rRNA (cytosine(1402)-N(4))-methyltransferase	K03438	Genetic Information Processing	Translation	Ribosome biogenesis	mraW, rsmH; 16S rRNA (cytosine1402-N4)-methyltransferase				333851	334778	927	-1	Nonessential	Nonessential		Nonessential	57	0.0614887	46	0.0496224	37	0.0399137	4.09833e-73	1.82115e-35	1	2.2504e-38
JCVISYN3A_0525	MMSYN1_0525	CDS	mraZ	Cell division/cell wall cluster transcriptional repressor	K03925	Genetic Information Processing	Transcription	Transcription factors	mraZ; MraZ protein				334786	335188	402	-1	Nonessential	Nonessential		Nonessential	23	0.0572139	16	0.039801	13	0.0323383	1.07593e-22	2.9236e-11	1	3.68014e-12
JCVISYN3A_0526	MMSYN1_0526	CDS	rpmF	50S ribosomal protein L32	K02911	Genetic Information Processing	Translation	Ribosome	RP-L32, MRPL32, rpmF; large subunit ribosomal protein L32				335294	335474	180	-1	Essential			Essential	7	0.0388889	0	0	0	0	0.999578	0.000218799	4.44271e-08	0.000202964
JCVISYN3A_0527	MMSYN1_0527	CDS	0527	Uncharacterized protein		Unclear	No Kegg ortholog	Function unknown	???				335488	336007	519	-1	Nonessential	Nonessential		Nonessential	28	0.0539499	13	0.0250482	10	0.0192678	1.57516e-10	5.70853e-05	0.99994	2.75914e-06
JCVISYN3A_0528	MMSYN1_0528	CDS	pheRS	Phenylalanine--tRNA ligase subunit beta	K01890	Genetic Information Processing	Translation	tRNA loading	FARSB, pheT; phenylalanyl-tRNA synthetase beta chain	PHETRS	Essential		336006	338391	2385	-1	Essential			Essential	7	0.00293501	0	0	0	0	1	0	0	1.11022e-16
JCVISYN3A_0529	MMSYN1_0529	CDS	pheS	Phenylalanine--tRNA ligase subunit alpha	K01889	Genetic Information Processing	Translation	tRNA loading	FARSA, pheS; phenylalanyl-tRNA synthetase alpha chain	PHETRS	Essential		338399	339452	1053	-1	Essential			Essential	2	0.00189934	3	0.002849	3	0.002849	1	0	0	7.77156e-16
JCVISYN3A_0530	MMSYN1_0530	CDS	0530	Uncharacterized protein		Unclear	No Kegg ortholog	Function unknown	???				339481	340090	609	-1	Quasiessential			Quasiessential	10	0.0164204	13	0.0213465	7	0.0114943	0.000143423	0.97332	0.0265323	3.90963e-06
JCVISYN3A_0532		rRNA	rrfB	5S ribosomal RNA	K01985	Genetic Information Processing	Non-coding RNA	rRNA	5SrRNA, rrf; 5S ribosomal RNA				340213	340322	109	-1	Essential			Essential	0	0	0	0	0	0	0.991236	0.00500335	1.88881e-05	0.003742
JCVISYN3A_0533		rRNA	rrlB	23S ribosomal RNA	K01980	Genetic Information Processing	Non-coding RNA	rRNA	23SrRNA, rrl; 23S ribosomal RNA				340383	343297	2914	-1	Essential			Essential	0	0	0	0	0	0	1	0	0	0
JCVISYN3A_0534		rRNA	rrsB	16S ribosomal RNA	K01977	Genetic Information Processing	Non-coding RNA	rRNA	16SrRNA, rrs; 16S ribosomal RNA				343516	345051	1535	-1	Essential			Essential	0	0	0	0	0	0	1	0	0	1.11022e-16
JCVISYN3A_0535	MMSYN1_0535	CDS	argRS	Arginine--tRNA ligase	K01887	Genetic Information Processing	Translation	tRNA loading	RARS, argS; arginyl-tRNA synthetase	ARGTRS	Essential		345257	346922	1665	-1	Essential			Essential	11	0.00660661	4	0.0024024	2	0.0012012	1	1.11022e-16	0	0
JCVISYN3A_0536	MMSYN1_0536	CDS	frr	Ribosome recycling factor	K02838	Genetic Information Processing	Translation	Translation factors	frr, MRRF, RRF; ribosome recycling factor				346923	347472	549	-1	Essential			Essential	16	0.0291439	2	0.00364299	0	0	1	4.74929e-09	2.43959e-19	5.13676e-11
JCVISYN3A_0537	MMSYN1_0537	CDS	pyrH	UMP kinase	K09903	Metabolism	Central Carbon Metabolism	Nucleotide metabolism	pyrH; uridylate kinase	UMPK	Essential		347482	348196	714	-1	Essential			Essential	5	0.0070028	2	0.00280112	0	0	1	3.23164e-12	1.86209e-25	5.76206e-14
JCVISYN3A_0538	MMSYN1_0538	CDS	0538	Uncharacterized protein		Unclear	No Kegg ortholog	Function unknown	???				348329	348935	606	-1	Nonessential	Nonessential		Nonessential	41	0.0676568	31	0.0511551	36	0.0594059	1.80867e-65	8.34087e-40	1	2.16844e-26
JCVISYN3A_0539	MMSYN1_0539	CDS	tsf	Translation elongation factor Ts	K02357	Genetic Information Processing	Translation	Translation factors	tsf, TSFM; elongation factor Ts				348934	349822	888	-1	Essential			Essential	6	0.00675676	3	0.00337838	2	0.00225225	1	2.38698e-14	6.7312e-28	2.81997e-14
JCVISYN3A_0540	MMSYN1_0540	CDS	rpsB	30S ribosomal protein S2	K02967	Genetic Information Processing	Translation	Ribosome	RP-S2, MRPS2, rpsB; small subunit ribosomal protein S2				349833	350712	879	-1	Essential			Essential	12	0.0136519	3	0.00341297	0	0	1	3.56382e-14	0	0
JCVISYN3A_0541	MMSYN1_0541	CDS	dnaJ	Molecular chaperone	K03686	Genetic Information Processing	Folding, Sorting and Degradation	Chaperones and folding catalysts	dnaJ; molecular chaperone DnaJ				350919	352038	1119	-1	Essential			Essential	9	0.0080429	3	0.00268097	0	0	1	0	0	0
JCVISYN3A_0542	MMSYN1_0542	CDS	dnaK	Molecular chaperone	K04043	Genetic Information Processing	Folding, Sorting and Degradation	Chaperones and folding catalysts	dnaK, HSPA9; molecular chaperone DnaK				352101	353877	1776	-1	Essential			Essential	2	0.00112613	0	0	0	0	1	0	0	0
JCVISYN3A_0543	MMSYN1_0543	CDS	grpE	Nucleotide exchange factor	K03687	Genetic Information Processing	Folding, Sorting and Degradation	Chaperones and folding catalysts	GRPE; molecular chaperone GrpE				353935	354538	603	-1	Essential			Essential	4	0.0066335	0	0	0	0	1	1.66211e-12	9.24597e-24	5.56277e-12
JCVISYN3A_0544	MMSYN1_0544	CDS	hrcA	Heat-inducible transcription repressor	K03705	Genetic Information Processing	Transcription	Transcription factors	hrcA; heat-inducible transcriptional repressor				354539	355562	1023	-1	Essential			Essential	2	0.00195503	0	0	0	0	1	0	0	0
JCVISYN3A_0545	MMSYN1_0545	CDS	clpB	ATP-dependent Clp protease subunit B	K03695	Genetic Information Processing	Folding, Sorting and Degradation	Chaperones and folding catalysts	clpB; ATP-dependent Clp protease ATP-binding subunit ClpB				355566	357708	2142	-1	Essential			Essential	16	0.00746965	5	0.00233427	1	0.000466853	1	0	0	0
JCVISYN3A_0546	MMSYN1_0547	pseudo	0547	Uncharacterized hydrolase		Unclear	No Kegg ortholog	Function unknown	???				357870	358736	866	-1	Nonessential	Nonessential		Nonessential	89	0.102771	75	0.0866051	66	0.0762125	4.78821e-151	3.80332e-77	1	1.25895e-74
JCVISYN3A_0548	MMSYN1_0548	CDS	0548	tRNA (cytidine(34)-2'-O)-methyltransferase	K03216	Genetic Information Processing	Translation	tRNA biogenesis	trmL, cspR; tRNA (cytidine/uridine-2'-O-)-methyltransferase				358735	359281	546	-1	Nonessential	Nonessential		Nonessential	72	0.131868	49	0.0897436	45	0.0824176	4.58742e-102	1.78549e-53	1	2.56927e-49
JCVISYN3A_0549	MMSYN1_0549	CDS	rgdB	Non-canonical purine NTP pyrophosphatase	K02428	Metabolism	Central Carbon Metabolism	Nucleotide metabolism	rdgB; XTP/dITP diphosphohydrolase				359293	359896	603	-1	Nonessential	Nonessential		Nonessential	47	0.0779436	29	0.0480929	33	0.0547264	5.81394e-59	1.16548e-35	1	4.98844e-24
JCVISYN3A_0931		manip	Met14p	Adenylyl-sulfate kinase	K00860	Metabolism	Central Carbon Metabolism	Nucleotide metabolism	cysC; adenylylsulfate kinase				360402	361011	609	1	Essential		Nonessential	Nonessential	2	0.00328407	2	0.00328407	3	0.00492611	1	3.34904e-10	2.30074e-17	6.86986e-08
JCVISYN3A_0592	MMSYN1_0592	CDS	0592	Uncharacterized protein		Unclear	No Kegg ortholog	Function unknown	???				361574	362774	1200	-1	Nonessential	Quasiessential		Quasiessential	67	0.0558333	49	0.0408333	34	0.0283333	2.01069e-62	2.18734e-26	1	9.19236e-37
JCVISYN3A_0593	MMSYN1_0593	CDS	0593	Uncharacterized protein		Unclear	No Kegg ortholog	Function unknown	???				363270	363549	279	-1	Nonessential	Nonessential		Nonessential	27	0.0967742	16	0.0573477	13	0.046595	2.96354e-27	1.84904e-13	1	1.60274e-14
JCVISYN3A_0599	MMSYN1_0599	CDS	0599	Uncharacterized protein		Unclear	No Kegg ortholog	Function unknown	???				363817	363958	141	-1	Nonessential	Nonessential		Nonessential	13	0.0921986	7	0.0496454	8	0.0567376	1.74289e-14	6.28089e-09	0.999997	2.7749e-06
JCVISYN3A_0600	MMSYN1_0600	CDS	rnjA	Ribonuclease J	K12574	Genetic Information Processing	Folding, Sorting and Degradation	RNA degradation	rnj; ribonuclease J				364771	366604	1833	1	Essential			Essential	8	0.00436443	0	0	0	0	1	0	0	0
JCVISYN3A_0601	MMSYN1_0601	CDS	0601	Uncharacterized protein		Unclear	No Kegg ortholog	Function unknown	???				366678	367623	945	1	Nonessential	Nonessential		Nonessential	57	0.0603175	37	0.0391534	30	0.031746	9.22005e-52	2.39688e-25	1	3.84669e-27
JCVISYN3A_0602	MMSYN1_0602	pseudo	0602	Uncharacterized protein		Unclear	No Kegg ortholog	Function unknown	???				367754	369517	1763	1	Nonessential	Nonessential		Nonessential	184	0.104368	142	0.0805445	110	0.0623936	1.99673e-260	1.07717e-122	1	1.85369e-138
JCVISYN3A_0604	MMSYN1_0604	CDS	0604	Uncharacterized protein	K03744	Unclear	Kegg ortholog defined	General function prediction only	lemA; LemA protein				369519	370188	669	1	Nonessential	Nonessential		Nonessential	69	0.103139	55	0.0822123	65	0.0971599	9.34282e-133	2.86996e-79	1	3.25538e-54
JCVISYN3A_0605	MMSYN1_0605	CDS	0605	Uncharacterized protein		Unclear	No Kegg ortholog	Function unknown	???				370370	370679	309	1	Nonessential	Nonessential		Nonessential	23	0.0744337	19	0.0614887	19	0.0614887	3.6061e-38	2.54347e-21	1	1.41779e-17
JCVISYN3A_0606	MMSYN1_0606	CDS	pgk	Phosphoglycerate kinase	K00927	Metabolism	Central Carbon Metabolism	Glycolysis	PGK, pgk; phosphoglycerate kinase	PGK	Essential		370945	372160	1215	-1	Essential			Essential	4	0.00329218	1	0.000823045	2	0.00164609	1	0	0	0
JCVISYN3A_0607	MMSYN1_0607	CDS	gapDH	Type I glyceraldehyde-3-phosphate dehydrogenase	K00134	Metabolism	Central Carbon Metabolism	Glycolysis	GAPDH, gapA; glyceraldehyde 3-phosphate dehydrogenase	GAPD	Essential		372271	373288	1017	-1	Essential			Essential	8	0.00786627	3	0.00294985	2	0.00196657	1	0	0	1.11022e-16
JCVISYN3A_0608	MMSYN1_0608	CDS	dnaI	Primosomal protein	K11144	Genetic Information Processing	DNA Maintenance	DNA replication	dnaI; primosomal protein DnaI				373388	374327	939	-1	Essential			Essential	1	0.00106496	0	0	0	0	1	0	0	0
JCVISYN3A_0609	MMSYN1_0609	CDS	dnaB	Chromosome replication initiation protein	K03346	Genetic Information Processing	DNA Maintenance	DNA replication	dnaB; replication initiation and membrane attachment protein				374336	375521	1185	-1	Essential			Essential	1	0.000843882	2	0.00168776	1	0.000843882	1	0	0	0
JCVISYN3A_0610	MMSYN1_0610	CDS	mutM	DNA-formamidopyrimidine glycosylase	K10563	Genetic Information Processing	DNA Maintenance	Base excision repair	mutM, fpg; formamidopyrimidine-DNA glycosylase				375677	376502	825	-1	Nonessential	Nonessential		Nonessential	54	0.0654545	43	0.0521212	39	0.0472727	4.58127e-76	4.34034e-40	1	1.05551e-36
JCVISYN3A_0611	MMSYN1_0611	CDS	polA	DNA polymerase I	K02335	Genetic Information Processing	DNA Maintenance	DNA replication	DPO1, polA; DNA polymerase I				376512	379248	2736	-1	Essential			Essential	27	0.00986842	11	0.00402047	6	0.00219298	1	0	0	0
JCVISYN3A_0612	MMSYN1_0612	CDS	dnaE	DNA polymerase III subunit alpha	K02337	Genetic Information Processing	DNA Maintenance	DNA replication complex	DPO3A1, dnaE; DNA polymerase III subunit alpha				379256	382220	2964	-1	Essential			Essential	24	0.00809717	5	0.00168691	3	0.00101215	1	0	0	1.11022e-16
JCVISYN3A_0613	MMSYN1_0613	CDS	tyrRS	Tyrosine--tRNA ligase	K01866	Genetic Information Processing	Translation	tRNA loading	YARS, tyrS; tyrosyl-tRNA synthetase	TYRTRS	Essential		382414	383659	1245	-1	Essential			Essential	6	0.00481928	0	0	1	0.000803213	1	0	0	0
JCVISYN3A_0614	MMSYN1_0614	CDS	pncB	Nicotinate phosphoribosyltransferase	K00763	Metabolism	Biosynthesis	Cofactor biosynthesis	pncB, NAPRT1; nicotinate phosphoribosyltransferase	NCTPPRT	Essential		383667	384729	1062	-1	Essential			Essential	17	0.0160075	3	0.00282486	0	0	1	0	0	0
JCVISYN3A_0615	MMSYN1_0615	CDS	0615	Uncharacterized protein	K06878	Unclear	Kegg ortholog defined	General function prediction only	K06878; tRNA-binding protein				384706	385315	609	-1	Nonessential	Quasiessential		Quasiessential	54	0.08867	38	0.0623974	26	0.0426929	7.89027e-60	9.3599e-26	1	8.42987e-35
JCVISYN3A_0616	MMSYN1_0616	CDS	fakB	Fatty acid binding protein		Metabolism	Biosynthesis	Lipid metabolism	???	FAKr	Essential		385389	386229	840	1	Essential			Essential	43	0.0511905	5	0.00595238	1	0.00119048	1	5.24747e-11	4.25288e-25	8.10463e-15
JCVISYN3A_0617	MMSYN1_0617	CDS	fakB	Fatty acid binding protein		Metabolism	Biosynthesis	Lipid metabolism	???	FAKr	Essential		386239	387091	852	1	Quasiessential			Quasiessential	94	0.110329	66	0.0774648	3	0.00352113	5.2311e-64	1	3.10918e-12	1.62644e-75
JCVISYN3A_0618	MMSYN1_0618	tRNA	Trp	tRNA-Trp	K14235	Genetic Information Processing	Non-coding RNA	tRNA	tRNA-Trp; tRNA Trp				387126	387201	75	-1	Nonessential	Nonessential		Nonessential	7	0.0933333	5	0.0666667	8	0.106667	1.63623e-14	4.15021e-10	0.999961	3.94236e-05
JCVISYN3A_0619	MMSYN1_0619	tRNA	Trp	tRNA-Trp	K14235	Genetic Information Processing	Non-coding RNA	tRNA	tRNA-Trp; tRNA Trp				387238	387314	76	-1	Essential			Essential	2	0.0263158	0	0	0	0	0.964592	0.0209347	0.000307441	0.0141657
JCVISYN3A_0620	MMSYN1_0620	CDS	0620	Uncharacterized transcriptional regulator		Genetic Information Processing	Transcription	Transcription factors	???				387389	387854	465	-1	Nonessential	Nonessential		Nonessential	31	0.0666667	28	0.0602151	30	0.0645161	1.14034e-58	6.28486e-34	1	1.81442e-25
JCVISYN3A_0621	MMSYN1_0621	CDS	acpA	Acyl carrier protein	K02078	Metabolism	Biosynthesis	Lipid metabolism	acpP; acyl carrier protein	ACP	Essential		387854	388076	222	-1	Essential			Essential	10	0.045045	2	0.00900901	1	0.0045045	0.990201	0.0088953	8.0452e-06	0.00089557
JCVISYN3A_0622	MMSYN1_0622	CDS	0622	Uncharacterized lipoprotein		Unclear	No Kegg ortholog	Function unknown	???				388099	388462	363	-1	Nonessential	Nonessential		Nonessential	10	0.0275482	8	0.0220386	9	0.0247934	7.25713e-09	2.32219e-06	0.996882	0.00311538
JCVISYN3A_0623	MMSYN1_0623	CDS	0623	Uncharacterized protein		Unclear	No Kegg ortholog	Function unknown	???				388448	389519	1071	-1	Nonessential	Nonessential		Nonessential	44	0.0410831	31	0.0289449	29	0.0270775	1.96687e-38	1.0762e-21	1	1.82761e-17
JCVISYN3A_0624	MMSYN1_0624	tRNA	His	tRNA-His	K14226	Genetic Information Processing	Non-coding RNA	tRNA	tRNA-His; tRNA His				389619	389695	76	-1	Essential			Essential	4	0.0526316	0	0	0	0	0.964592	0.0209347	0.000307441	0.0141657
JCVISYN3A_0634	MMSYN1_0634	CDS	leuRS	Leucine--tRNA ligase	K01869	Genetic Information Processing	Translation	tRNA loading	LARS, leuS; leucyl-tRNA synthetase	LEUTRS	Essential		389881	392296	2415	-1	Essential			Essential	6	0.00248447	3	0.00124224	0	0	1	0	0	1.11022e-16
JCVISYN3A_0635	MMSYN1_0635	tRNA	Ile	tRNA-Ile	K14227	Genetic Information Processing	Non-coding RNA	tRNA	tRNA-Ile; tRNA Ile				392433	392510	77	-1	Essential			Essential	1	0.012987	1	0.012987	0	0	0.737805	0.248297	0.00349935	0.0103982
JCVISYN3A_0636	MMSYN1_0636	CDS	0636	Uncharacterized lipoprotein		Unclear	No Kegg ortholog	Function unknown	???				392582	395372	2790	-1	Essential			Essential	14	0.00501792	4	0.00143369	2	0.000716846	1	0	0	0
JCVISYN3A_0637	MMSYN1_0637	CDS	rpsI	30S ribosomal protein S9	K02996	Genetic Information Processing	Translation	Ribosome	RP-S9, MRPS9, rpsI; small subunit ribosomal protein S9				395530	395929	399	-1	Inconsistent		Essential	Essential	13	0.0325815	6	0.0150376	11	0.0275689	1.30408e-08	3.23601e-09	0.198811	0.801189
JCVISYN3A_0638	MMSYN1_0638	CDS	rplM	50S ribosomal protein L13	K02871	Genetic Information Processing	Translation	Ribosome	RP-L13, MRPL13, rplM; large subunit ribosomal protein L13				395928	396384	456	-1	Essential			Essential	10	0.0219298	0	0	0	0	1	1.10248e-09	2.60434e-18	2.36225e-09
JCVISYN3A_0639	MMSYN1_0639	CDS	0639	Uncharacterized efflux ABC transporter permease protein		Metabolism	Membrane Transport	Generic	???				396513	400659	4146	-1	Essential			Essential	14	0.00337675	5	0.00120598	4	0.000964785	1	0	0	0
JCVISYN3A_0640	MMSYN1_0640	CDS	truA	tRNA pseudouridine(38-40) synthase	K06173	Genetic Information Processing	Translation	tRNA biogenesis	truA, PUS1; tRNA pseudouridine38-40 synthase				400753	401509	756	-1	Nonessential	Quasiessential		Quasiessential	64	0.0846561	29	0.0383598	21	0.0277778	1.70743e-36	3.95843e-16	1	4.31341e-21
JCVISYN3A_0641	MMSYN1_0641	CDS	ecfT	ECF transporter T component	K16785	Metabolism	Membrane Transport	Other Transport	ecfT; energy-coupling factor transport system permease protein	EcfT	Essential		401511	402522	1011	-1	Essential			Essential	6	0.00593472	3	0.00296736	2	0.00197824	1	1.11022e-16	2.46519e-32	2.22045e-16
JCVISYN3A_0642	MMSYN1_0642	CDS	ecfA	ECF transporter ATPase	K16787	Metabolism	Membrane Transport	Other Transport	ecfA2; energy-coupling factor transport system ATP-binding protein	EcfA	Essential		402535	403447	912	-1	Essential			Essential	2	0.00219298	1	0.00109649	0	0	1	0	0	0
JCVISYN3A_0643	MMSYN1_0643	CDS	ecfA	ECF transporter ATPase	K16786	Metabolism	Membrane Transport	Other Transport	ecfA1; energy-coupling factor transport system ATP-binding protein	EcfA	Essential		403434	404661	1227	-1	Essential			Essential	2	0.00162999	0	0	0	0	1	0	0	0
JCVISYN3A_0644	MMSYN1_0644	CDS	rplQ	50S ribosomal protein L17	K02879	Genetic Information Processing	Translation	Ribosome	RP-L17, MRPL17, rplQ; large subunit ribosomal protein L17				404768	405128	360	-1	Essential			Essential	3	0.00833333	0	0	0	0	1	7.67548e-08	9.4341e-15	1.22912e-07
JCVISYN3A_0645	MMSYN1_0645	CDS	rpoA	DNA-directed RNA polymerase subunit alpha	K03040	Genetic Information Processing	Transcription	Transcription machinery	rpoA; DNA-directed RNA polymerase subunit alpha				405147	406101	954	-1	Essential			Essential	0	0	0	0	0	0	1	0	0	0
JCVISYN3A_0646	MMSYN1_0646	CDS	rpsK	30S ribosomal protein S11	K02948	Genetic Information Processing	Translation	Ribosome	RP-S11, MRPS11, rpsK; small subunit ribosomal protein S11				406104	406494	390	-1	Essential			Essential	10	0.025641	0	0	0	0	1	2.03822e-08	7.28639e-16	3.57488e-08
JCVISYN3A_0647	MMSYN1_0647	CDS	rpsM	30S ribosomal protein S13	K02952	Genetic Information Processing	Translation	Ribosome	RP-S13, rpsM; small subunit ribosomal protein S13				406519	406885	366	-1	Essential			Essential	4	0.010929	1	0.00273224	0	0	0.999999	9.54192e-07	9.16145e-14	9.60125e-08
JCVISYN3A_0648		CDS	rpmJ	50S ribosomal protein L36	K02919	Genetic Information Processing	Translation	Ribosome	RP-L36, MRPL36, rpmJ; large subunit ribosomal protein L36				406921	407035	114	1	Essential			Essential	2	0.0175439	0	0	0	0	0.992918	0.00401811	1.23469e-05	0.00305106
JCVISYN3A_0649	MMSYN1_0649	CDS	infA	Translation initiation factor IF-1	K02518	Genetic Information Processing	Translation	Translation factors	infA; translation initiation factor IF-1				407103	407328	225	-1	Essential			Essential	3	0.0133333	2	0.00888889	1	0.00444444	0.991401	0.00780012	6.23511e-06	0.000792487
JCVISYN3A_0650	MMSYN1_0650	CDS	map	Type I methionyl aminopeptidase	K01265	Genetic Information Processing	Folding, Sorting and Degradation	Peptidases	map; methionyl aminopeptidase	Met peptidase	Essential		407339	408095	756	-1	Essential			Essential	20	0.026455	3	0.00396825	0	0	1	8.18334e-12	8.35851e-26	1.02141e-14
JCVISYN3A_0651	MMSYN1_0651	CDS	adk	Adenylate kinase	K00939	Metabolism	Central Carbon Metabolism	Nucleotide metabolism	adk, AK; adenylate kinase	(D)ADK	Essential		408094	408736	642	-1	Essential			Essential	9	0.0140187	2	0.00311526	0	0	1	7.78899e-11	8.70027e-23	1.117e-12
JCVISYN3A_0652	MMSYN1_0652	CDS	secY	Preprotein translocase subunit	K03076	Genetic Information Processing	Folding, Sorting and Degradation	Protein export	secY; preprotein translocase subunit SecY				408863	410312	1449	-1	Essential			Essential	11	0.00759144	2	0.00138026	0	0	1	0	0	0
JCVISYN3A_0653	MMSYN1_0653	CDS	rplO	50S ribosomal protein L15	K02876	Genetic Information Processing	Translation	Ribosome	RP-L15, MRPL15, rplO; large subunit ribosomal protein L15				410311	410749	438	-1	Quasiessential			Quasiessential	23	0.0525114	14	0.0319635	0	0	4.74561e-09	1	4.95594e-09	2.3519e-17
JCVISYN3A_0654	MMSYN1_0654	CDS	rpsE	30S ribosomal protein S5	K02988	Genetic Information Processing	Translation	Ribosome	RP-S5, MRPS5, rpsE; small subunit ribosomal protein S5				410767	411532	765	-1	Essential			Essential	2	0.00261438	0	0	0	0	1	1.22125e-15	8.67747e-30	7.10543e-15
JCVISYN3A_0655	MMSYN1_0655	CDS	rplR	50S ribosomal protein L18	K02881	Genetic Information Processing	Translation	Ribosome	RP-L18, MRPL18, rplR; large subunit ribosomal protein L18				411550	411901	351	-1	Essential			Essential	1	0.002849	0	0	0	0	1	1.14251e-07	2.03403e-14	1.78031e-07
JCVISYN3A_0656	MMSYN1_0656	CDS	rplF	50S ribosomal protein L6	K02933	Genetic Information Processing	Translation	Ribosome	RP-L6, MRPL6, rplF; large subunit ribosomal protein L6				411926	412469	543	-1	Essential			Essential	5	0.0092081	0	0	0	0	1	2.3572e-11	1.55007e-21	6.57591e-11
JCVISYN3A_0657	MMSYN1_0657	CDS	rpsH	30S ribosomal protein S8	K02994	Genetic Information Processing	Translation	Ribosome	RP-S8, rpsH; small subunit ribosomal protein S8				412482	412872	390	-1	Essential			Essential	2	0.00512821	1	0.0025641	0	0	1	3.30334e-07	1.1809e-14	3.57487e-08
JCVISYN3A_0658	MMSYN1_0658	CDS	rpsN	30S ribosomal protein S14	K02954	Genetic Information Processing	Translation	Ribosome	RP-S14, MRPS14, rpsN; small subunit ribosomal protein S14				412891	413077	186	-1	Essential			Essential	1	0.00537634	0	0	0	0	0.999674	0.000167848	2.66227e-08	0.00015856
JCVISYN3A_0659	MMSYN1_0659	CDS	rplE	50S ribosomal protein L5	K02931	Genetic Information Processing	Translation	Ribosome	RP-L5, MRPL5, rplE; large subunit ribosomal protein L5				413095	413638	543	-1	Essential			Essential	2	0.00368324	0	0	0	0	1	2.3572e-11	1.55007e-21	6.57591e-11
JCVISYN3A_0660	MMSYN1_0660	CDS	rplX	50S ribosomal protein L24	K02895	Genetic Information Processing	Translation	Ribosome	RP-L24, MRPL24, rplX; large subunit ribosomal protein L24				413656	413983	327	-1	Essential			Essential	1	0.0030581	0	0	0	0	0.999999	3.30023e-07	1.578e-13	4.78148e-07
JCVISYN3A_0661	MMSYN1_0661	CDS	rplN	50S ribosomal protein L14	K02874	Genetic Information Processing	Translation	Ribosome	RP-L14, MRPL14, rplN; large subunit ribosomal protein L14				413996	414365	369	-1	Essential			Essential	3	0.00813008	0	0	0	0	1	5.15643e-08	4.37567e-15	8.48584e-08
JCVISYN3A_0662	MMSYN1_0662	CDS	rpsQ	30S ribosomal protein S17	K02961	Genetic Information Processing	Translation	Ribosome	RP-S17, MRPS17, rpsQ; small subunit ribosomal protein S17				414380	414641	261	-1	Essential			Essential	1	0.00383142	0	0	0	0	0.999987	6.10124e-06	4.41486e-11	7.23591e-06
JCVISYN3A_0663	MMSYN1_0663	CDS	rpmC	50S ribosomal protein L29	K02904	Genetic Information Processing	Translation	Ribosome	RP-L29, rpmC; large subunit ribosomal protein L29				414637	415054	417	-1	Essential			Essential	0	0	0	0	0	0	1	6.17992e-09	7.27014e-17	1.17641e-08
JCVISYN3A_0664	MMSYN1_0664	CDS	rplP	50S ribosomal protein L16	K02878	Genetic Information Processing	Translation	Ribosome	RP-L16, MRPL16, rplP; large subunit ribosomal protein L16				415053	415467	414	-1	Essential			Essential	1	0.00241546	0	0	0	0	1	7.05616e-09	9.39208e-17	1.33105e-08
JCVISYN3A_0665	MMSYN1_0665	CDS	rpsC	30S ribosomal protein S3	K02982	Genetic Information Processing	Translation	Ribosome	RP-S3, rpsC; small subunit ribosomal protein S3				415469	416171	702	-1	Essential			Essential	3	0.0042735	0	0	0	0	1	2.09832e-14	1.98249e-27	9.448e-14
JCVISYN3A_0666	MMSYN1_0666	CDS	rplV	50S ribosomal protein L22	K02890	Genetic Information Processing	Translation	Ribosome	RP-L22, MRPL22, rplV; large subunit ribosomal protein L22				416188	416524	336	-1	Essential			Essential	0	0	0	0	1	0.00297619	0.999991	2.2171e-07	1.83692e-12	8.28518e-06
JCVISYN3A_0667	MMSYN1_0667	CDS	rpsS	30S ribosomal protein S19	K02965	Genetic Information Processing	Translation	Ribosome	RP-S19, rpsS; small subunit ribosomal protein S19				416547	416814	267	-1	Essential			Essential	0	0	0	0	0	0	0.99999	4.68003e-06	2.64533e-11	5.65233e-06
JCVISYN3A_0668	MMSYN1_0668	CDS	rplB	50S ribosomal protein L2	K02886	Genetic Information Processing	Translation	Ribosome	RP-L2, MRPL2, rplB; large subunit ribosomal protein L2				416835	417684	849	-1	Essential			Essential	4	0.00471143	0	0	0	0	1	1.11022e-16	2.46519e-32	2.22045e-16
JCVISYN3A_0669	MMSYN1_0669	CDS	rplW	50S ribosomal protein L23	K02892	Genetic Information Processing	Translation	Ribosome	RP-L23, MRPL23, rplW; large subunit ribosomal protein L23				417738	418023	285	-1	Essential			Essential	1	0.00350877	0	0	0	0	0.999995	2.11222e-06	5.69075e-12	2.6942e-06
JCVISYN3A_0670	MMSYN1_0670	CDS	rplD	50S ribosomal protein L4	K02926	Genetic Information Processing	Translation	Ribosome	RP-L4, MRPL4, rplD; large subunit ribosomal protein L4				418022	418649	627	-1	Essential			Essential	0	0	0	0	0	0	1	5.7554e-13	1.19201e-24	2.07112e-12
JCVISYN3A_0671	MMSYN1_0671	CDS	rplC	50S ribosomal protein L3	K02906	Genetic Information Processing	Translation	Ribosome	RP-L3, MRPL3, rplC; large subunit ribosomal protein L3				418661	419333	672	-1	Essential			Essential	0	0	0	0	0	0	1	7.86038e-14	2.55433e-26	3.24962e-13
JCVISYN3A_0672	MMSYN1_0672	CDS	rpsJ	30S ribosomal protein S10	K02946	Genetic Information Processing	Translation	Ribosome	RP-S10, MRPS10, rpsJ; small subunit ribosomal protein S10				419408	419717	309	-1	Essential			Essential	4	0.012945	1	0.00323625	1	0.00323625	0.999963	1.18507e-05	2.98366e-10	2.51762e-05
JCVISYN3A_0678	MMSYN1_0678	tRNA	Thr	tRNA-Thr	K14234	Genetic Information Processing	Non-coding RNA	tRNA	tRNA-Thr; tRNA Thr				420559	420635	76	-1	Essential			Essential	5	0.0657895	0	0	0	0	0.964592	0.0209347	0.000307441	0.0141657
JCVISYN3A_0679	MMSYN1_0679	tRNA	Val	tRNA-Val	K14237	Genetic Information Processing	Non-coding RNA	tRNA	tRNA-Val; tRNA Val				420647	420723	76	-1	Essential			Essential	6	0.0789474	0	0	0	0	0.964592	0.0209347	0.000307441	0.0141657
JCVISYN3A_0680	MMSYN1_0680	tRNA	Glu	tRNA-Glu	K14224	Genetic Information Processing	Non-coding RNA	tRNA	tRNA-Glu; tRNA Glu				420730	420806	76	-1	Essential			Essential	2	0.0263158	0	0	0	0	0.964592	0.0209347	0.000307441	0.0141657
JCVISYN3A_0681	MMSYN1_0681	tRNA	Asn	tRNA-Asn	K14220	Genetic Information Processing	Non-coding RNA	tRNA	tRNA-Asn; tRNA Asn				420813	420889	76	-1	Essential			Essential	0	0	0	0	0	0	0.964592	0.0209347	0.000307441	0.0141657
JCVISYN3A_0684	MMSYN1_0684	CDS	folD	Bifunctional 5,10-methylene-tetrahydrofolate dehydrogenase/5,10-methylene-tetrahydrofolate cyclohydrolase	K01491	Metabolism	Central Carbon Metabolism	Other central metabolism enzymes	folD; methylenetetrahydrofolate dehydrogenase (NADP+) / methenyltetrahydrofolate cyclohydrolase	MTHFC	Essential		420990	421857	867	-1	Quasiessential			Quasiessential	64	0.0738178	31	0.0357555	0	0	2.21859e-21	1	2.22045e-16	4.92626e-37
JCVISYN3A_0685	MMSYN1_0685	CDS	natA	Sodium transporter	K09697	Metabolism	Membrane Transport	Inorganic	natA; sodium transport system ATP-binding protein	Kt6	Essential		421865	423467	1602	-1	Essential			Essential	36	0.0224719	11	0.00686642	2	0.00124844	1	0	0	0
JCVISYN3A_0686	MMSYN1_0686	CDS	trkA	Potassium transporter	K03499	Metabolism	Membrane Transport	Inorganic	trkA, ktrA; trk system potassium uptake protein	Kt6	Essential		423545	424274	729	1	Essential			Essential	20	0.0274348	0	0	0	0	1	6.43929e-15	2.00173e-28	3.10862e-14
JCVISYN3A_0687	MMSYN1_0687	CDS	gatB	Glutamyl-tRNA amidotransferase subunit B	K02434	Genetic Information Processing	Translation	tRNA loading	gatB, PET112; aspartyl-tRNA(Asn)/glutamyl-tRNA(Gln) amidotransferase subunit B	GLNTRAT	Essential		424300	425740	1440	-1	Essential			Essential	8	0.00555556	1	0.000694444	1	0.000694444	1	1.11022e-16	0	0
JCVISYN3A_0688	MMSYN1_0688	CDS	gatA	Glutamyl-tRNA amidotransferase subunit A	K02433	Genetic Information Processing	Translation	tRNA loading	gatA, QRSL1; aspartyl-tRNA(Asn)/glutamyl-tRNA(Gln) amidotransferase subunit A	GLNTRAT	Essential		425741	427199	1458	-1	Essential			Essential	12	0.00823045	2	0.00137174	0	0	1	0	0	0
JCVISYN3A_0689	MMSYN1_0689	CDS	gatC	Glutamyl-tRNA amidotransferase subunit C	K02435	Genetic Information Processing	Translation	tRNA loading	gatC, GATC; aspartyl-tRNA(Asn)/glutamyl-tRNA(Gln) amidotransferase subunit C	GLNTRAT	Essential		427198	427495	297	-1	Essential			Essential	5	0.016835	2	0.00673401	0	0	0.999672	0.000326332	5.36484e-10	1.64344e-06
JCVISYN3A_0690	MMSYN1_0690	CDS	ligA	DNA ligase (NAD(+))	K01972	Genetic Information Processing	DNA Maintenance	DNA replication complex	E6.5.1.2, ligA, ligB; DNA ligase (NAD+)				427496	429503	2007	-1	Essential			Essential	11	0.00548082	2	0.000996512	2	0.000996512	1	0	0	0
JCVISYN3A_0691	MMSYN1_0691	CDS	0691	Uncharacterized protein		Unclear	No Kegg ortholog	Function unknown	???				429506	431528	2022	-1	Essential			Essential	35	0.0173096	21	0.0103858	0	0	1	2.43139e-14	0	0
JCVISYN3A_0692	MMSYN1_0692	CDS	0692	Uncharacterized pseudouridine synthase	K06179	Genetic Information Processing	Translation	Ribosome biogenesis	rluC; 23S rRNA pseudouridine955/2504/2580 synthase				431530	432439	909	-1	Nonessential	Nonessential		Nonessential	56	0.0616062	39	0.0429043	32	0.0352035	2.5788e-58	8.64488e-29	1	2.98304e-30
JCVISYN3A_0693	MMSYN1_0693	CDS	0693	Uncharacterized protease	K07052	Genetic Information Processing	Folding, Sorting and Degradation	Peptidases	K07052; uncharacterized protein				432441	433410	969	-1	Essential			Essential	14	0.0144479	6	0.00619195	3	0.00309598	1	2.84095e-12	7.12824e-26	2.5091e-14
JCVISYN3A_0694	MMSYN1_0694	CDS	ptsH	Phosphocarrier protein	K11189	Metabolism	Membrane Transport	Carbohydrates	PTS-HPR; phosphocarrier protein	GLCpts	Essential		433465	433735	270	-1	Essential			Essential	11	0.0407407	0	0	0	0	0.999991	4.09886e-06	2.04768e-11	4.99568e-06
JCVISYN3A_0695	MMSYN1_0695	CDS	pcrA	ATP-dependent DNA helicase	K03657	Genetic Information Processing	DNA Maintenance	Nucleotide excision repair	uvrD, pcrA; DNA helicase II / ATP-dependent DNA helicase PcrA				433799	435968	2169	-1	Quasiessential			Quasiessential	125	0.0576302	64	0.0295067	6	0.00276625	2.61811e-36	1	0	0
JCVISYN3A_0696	MMSYN1_0696	CDS	0696	Uncharacterized transporter		Metabolism	Membrane Transport	Generic	???				435984	436740	756	-1	Essential			Essential	14	0.0185185	4	0.00529101	2	0.0026455	1	1.32629e-10	8.54877e-22	6.44562e-12
JCVISYN3A_0697	MMSYN1_0697	CDS	0697	Uncharacterized glycosyl transferase		Metabolism	Biosynthesis	Lipid metabolism	???	DAGGALT	Nonessential	2.02442	436739	437696	957	-1	Quasiessential			Quasiessential	50	0.0522466	23	0.0240334	9	0.00940439	5.63959e-10	0.99999	1.03115e-05	5.81531e-15
JCVISYN3A_0706	MMSYN1_0706	CDS	thiB	Thiamine ABC transporter permease	K02063	Metabolism	Membrane Transport	Cofactor	thiP; thiamine transport system permease protein	THMPPabc	Essential		438117	439866	1749	-1	Nonessential	Quasiessential		Quasiessential	152	0.0869068	102	0.058319	25	0.0142939	1.3764e-93	0.000564125	0.999436	2.43851e-90
JCVISYN3A_0707	MMSYN1_0707	CDS	thiQ	Thiamine ABC transporter ATP-binding protein	K02062	Metabolism	Membrane Transport	Cofactor	thiQ; thiamine transport system ATP-binding protein	THMPPabc	Essential		439829	440579	750	-1	Nonessential	Quasiessential		Quasiessential	51	0.068	41	0.0546667	13	0.0173333	4.90463e-40	4.86828e-05	0.999951	1.00742e-35
JCVISYN3A_0708	MMSYN1_0708	CDS	0708	Thiamine ABC transporter substrate-binding protein	K02064	Metabolism	Membrane Transport	Cofactor	thiB, tbpA; thiamine transport system substrate-binding protein	THMPPabc	Essential		440592	442056	1464	-1	Nonessential	Quasiessential		Quasiessential	199	0.135929	145	0.0990437	90	0.0614754	3.7954e-247	4.78268e-100	1	7.93572e-148
JCVISYN3A_0934		misc_binding	TPP	TPP riboswitch (THI element)		Unclear	No Kegg ortholog	Function unknown	???				442112	442203	91	-1	Nonessential	Quasiessential		Quasiessential	19	0.208791	14	0.153846	9	0.0989011	3.31185e-26	3.19514e-11	1	1.03653e-15
JCVISYN3A_0710	MMSYN1_0710	CDS	0710	Uncharacterized hydrolase		Unclear	No Kegg ortholog	Function unknown	???				442278	443142	864	-1	Essential		Quasiessential	Quasiessential	27	0.03125	9	0.0104167	6	0.00694444	0.999999	1.25335e-06	3.75929e-14	2.99939e-08
JCVISYN3A_0717	MMSYN1_0717	tRNA	Arg	tRNA-Arg	K14219	Genetic Information Processing	Non-coding RNA	tRNA	tRNA-Arg; tRNA Arg				443478	443555	77	1	Essential			Essential	0	0	0	0	0	0	0.966043	0.0200597	0.00028271	0.0136148
JCVISYN3A_0718	MMSYN1_0718	tRNA	Pro	tRNA-Pro	K14232	Genetic Information Processing	Non-coding RNA	tRNA	tRNA-Pro; tRNA Pro				443602	443679	77	1	Essential			Essential	0	0	0	0	0	0	0.966043	0.0200597	0.00028271	0.0136148
JCVISYN3A_0719	MMSYN1_0719	tRNA	Ala	tRNA-Ala	K14218	Genetic Information Processing	Non-coding RNA	tRNA	tRNA-Ala; tRNA Ala				443689	443765	76	1	Essential			Essential	0	0	0	0	0	0	0.964592	0.0209347	0.000307441	0.0141657
JCVISYN3A_0720	MMSYN1_0720	tRNA	Met	tRNA-Met	K14230	Genetic Information Processing	Non-coding RNA	tRNA	tRNA-Met; tRNA Met				443769	443846	77	1	Essential			Essential	2	0.025974	0	0	0	0	0.966043	0.0200597	0.00028271	0.0136148
JCVISYN3A_0721	MMSYN1_0721	tRNA	Met	tRNA-Met	K14230	Genetic Information Processing	Non-coding RNA	tRNA	tRNA-Met; tRNA Met				443857	443934	77	1	Essential			Essential	2	0.025974	0	0	0	0	0.966043	0.0200597	0.00028271	0.0136148
JCVISYN3A_0722	MMSYN1_0722	tRNA	Ser	tRNA-Ser	K14233	Genetic Information Processing	Non-coding RNA	tRNA	tRNA-Ser; tRNA Ser				443976	444069	93	1	Essential			Essential	2	0.0215054	0	0	1	0.0107527	0.836694	0.00856589	0.00156815	0.153172
JCVISYN3A_0723	MMSYN1_0723	tRNA	Met	tRNA-Met	K14230	Genetic Information Processing	Non-coding RNA	tRNA	tRNA-Met; tRNA Met				444091	444167	76	1	Essential			Essential	4	0.0526316	1	0.0131579	0	0	0.729079	0.256448	0.00376611	0.010707
JCVISYN3A_0724	MMSYN1_0724	tRNA	Asp	tRNA-Asp	K14221	Genetic Information Processing	Non-coding RNA	tRNA	tRNA-Asp; tRNA Asp				444169	444246	77	1	Essential			Essential	0	0	0	0	0	0	0.966043	0.0200597	0.00028271	0.0136148
JCVISYN3A_0725	MMSYN1_0725	tRNA	Phe	tRNA-Phe	K14231	Genetic Information Processing	Non-coding RNA	tRNA	tRNA-Phe; tRNA Phe				444254	444330	76	1	Essential			Essential	6	0.0789474	1	0.0131579	0	0	0.729079	0.256448	0.00376611	0.010707
JCVISYN3A_0726	MMSYN1_0726	CDS	nagB	Glucosamine-6-phosphate deaminase	K02564	Metabolism	Central Carbon Metabolism	Other central metabolism enzymes	nagB, GNPDA; glucosamine-6-phosphate deaminase	G6PDA	Nonessential	2.02442	444437	445172	735	1	Nonessential	Nonessential		Nonessential	47	0.0639456	29	0.0394558	29	0.0394558	1.8058e-48	1.05913e-27	1	1.70499e-21
JCVISYN3A_0727	MMSYN1_0727	CDS	tpiA	Triose-phosphate isomerase	K01803	Metabolism	Central Carbon Metabolism	Glycolysis	TPI, tpiA; triosephosphate isomerase (TIM)	TPI	Essential		445269	446016	747	1	Essential			Essential	4	0.00535475	0	0	0	0	1	2.66454e-15	3.96403e-29	1.4877e-14
JCVISYN3A_0728	MMSYN1_0728	CDS	0728	Uncharacterized hydrolase		Unclear	No Kegg ortholog	Function unknown	???				446008	446845	837	1	Nonessential	Nonessential		Nonessential	55	0.0657109	35	0.041816	33	0.0394265	1.5182e-57	1.77793e-31	1	8.53918e-27
JCVISYN3A_0729	MMSYN1_0729	CDS	pgm	Phosphoglycerate mutase (2,3-diphosphoglycerate-independent)	K15633	Metabolism	Central Carbon Metabolism	Glycolysis	gpmI; 2,3-bisphosphoglycerate-independent phosphoglycerate mutase	PGM	Essential		446847	448443	1596	1	Essential			Essential	15	0.0093985	2	0.00125313	0	0	1	0	0	1.11022e-16
JCVISYN3A_0730	MMSYN1_0730	CDS	0730	Uncharacterized protein		Unclear	No Kegg ortholog	Function unknown	???				448542	449142	600	1	Nonessential	Quasiessential		Quasiessential	33	0.055	32	0.0533333	23	0.0383333	1.04851e-48	1.02164e-21	1	1.0263e-27
JCVISYN3A_0732	MMSYN1_0732	CDS	deoC	Deoxyribose-phosphate aldolase	K01619	Metabolism	Central Carbon Metabolism	Pentose phosphate metabolism	deoC, DERA; deoxyribose-phosphate aldolase	DRPA	Nonessential	2.02442	449194	449863	669	-1	Nonessential	Nonessential		Nonessential	78	0.116592	49	0.0732436	39	0.058296	4.16291e-89	7.05644e-43	1	5.89945e-47
JCVISYN3A_0733	MMSYN1_0733	CDS	deoB	Phosphopentomutase	K01835	Metabolism	Biosynthesis	Lipid metabolism	pgm; phosphoglucomutase	PGMT/PPM	Essential		449874	451551	1677	-1	Essential			Essential	34	0.0202743	12	0.00715564	4	0.00238521	1	1.11022e-16	1.2326e-32	1.11022e-16
JCVISYN3A_0747	MMSYN1_0747	CDS	punA	Purine-nucleoside phosphorylase	K03784	Metabolism	Central Carbon Metabolism	Nucleotide metabolism	deoD; purine-nucleoside phosphorylase	PNP	Nonessential	2.04191	451914	452568	654	1	Nonessential	Quasiessential		Quasiessential	75	0.114679	47	0.0718654	28	0.0428135	7.5644e-72	9.473e-28	1	7.98523e-45
JCVISYN3A_0771	MMSYN1_0771	CDS	nrdE	Ribonucleotide-diphosphate reductase subunit alpha	K00525	Genetic Information Processing	DNA Maintenance	DNA repair and recombination proteins	E1.17.4.1A, nrdA, nrdE; ribonucleoside-diphosphate reductase alpha chain	RNDR	Essential		452720	454883	2163	-1	Quasiessential			Quasiessential	116	0.0536292	67	0.0309755	3	0.00138696	4.7175e-40	1	0	0
JCVISYN3A_0772	MMSYN1_0772	CDS	nrdI	Ribonucleotide reductase assembly protein	K03647	Metabolism	Central Carbon Metabolism	Nucleotide metabolism	nrdI; protein involved in ribonucleotide reduction	RNDR	Essential		454869	455343	474	-1	Essential			Essential	17	0.035865	6	0.0126582	0	0	0.991063	0.00893658	1.00623e-11	1.1159e-09
JCVISYN3A_0773	MMSYN1_0773	CDS	nrdF	Ribonucleoside-diphosphate reductase subunit beta	K00526	Genetic Information Processing	DNA Maintenance	DNA repair and recombination proteins	E1.17.4.1B, nrdB, nrdF; ribonucleoside-diphosphate reductase beta chain	RNDR	Essential		455351	456371	1020	-1	Quasiessential			Quasiessential	60	0.0588235	36	0.0352941	0	0	1.71563e-24	1	0	0
JCVISYN3A_0774	MMSYN1_0774	CDS	secG	Preprotein translocase subunit	K03075	Genetic Information Processing	Folding, Sorting and Degradation	Protein export	secG; preprotein translocase subunit SecG				456669	456954	285	1	Quasiessential			Quasiessential	9	0.0315789	5	0.0175439	2	0.00701754	0.296953	0.701353	0.00119029	0.00050397
JCVISYN3A_0775	MMSYN1_0775	CDS	rnr	Ribonuclease R	K12573	Genetic Information Processing	Folding, Sorting and Degradation	RNA degradation	rnr, vacB; ribonuclease R				456989	459104	2115	1	Essential			Essential	82	0.0387707	19	0.00898345	1	0.000472813	1	0	0	0
JCVISYN3A_0776	MMSYN1_0776	CDS	smpB	SsrA-binding protein	K03664	Genetic Information Processing	Translation	Translation factors	smpB; SsrA-binding protein				459113	459560	447	1	Essential			Essential	1	0.00223714	0	0	0	0	1	1.64108e-09	5.61506e-18	3.42157e-09
JCVISYN3A_0777	MMSYN1_0777	CDS	0777	Uncharacterized protein		Unclear	No Kegg ortholog	Function unknown	???				459559	460045	486	1	Nonessential	Quasiessential		Quasiessential	30	0.0617284	24	0.0493827	9	0.0185185	1.16602e-23	0.000368184	0.999632	3.16579e-20
JCVISYN3A_0778	MMSYN1_0778	CDS	0778	Uncharacterized protein		Unclear	No Kegg ortholog	Function unknown	???				460164	460416	252	1	Essential			Essential	1	0.00396825	1	0.00396825	0	0	0.999842	0.000147168	1.54245e-09	1.04793e-05
JCVISYN3A_0779	MMSYN1_0779	CDS	ptsG	PTS sugar transporter	K02778	Metabolism	Membrane Transport	Carbohydrates	PTS-Glc-EIIB, ptsG; PTS system, glucose-specific IIB component	GLCpts	Essential		460466	462704	2238	1	Essential			Essential	46	0.0205541	5	0.00223414	3	0.00134048	1	0	0	1.11022e-16
JCVISYN3A_0787	MMSYN1_0787	CDS	mgtA	Magnesium-translocating P-type ATPase	K01531	Metabolism	Membrane Transport	Inorganic	mgtA, mgtB; Mg2+-importing ATPase	MG2abc	Essential		463041	465870	2829	-1	Essential			Essential	25	0.00883704	3	0.00106045	0	0	1	0	0	0
JCVISYN3A_0789	MMSYN1_0789	CDS	atpC	F0F1 ATP synthase subunit delta/epsilon		Metabolism	Membrane Transport	Other Transport	???	ATPase	Essential		466287	466587	300	-1	Nonessential	Nonessential	Essential	Essential	13	0.0433333	9	0.03	8	0.0266667	5.20547e-11	4.37107e-06	0.999984	1.19087e-05
JCVISYN3A_0790	MMSYN1_0790	CDS	atpD	F0F1 ATP synthase subunit beta		Metabolism	Membrane Transport	Other Transport	???	ATPase	Essential		466586	468014	1428	-1	Essential			Essential	48	0.0336134	3	0.00210084	0	0	1	0	0	0
JCVISYN3A_0791	MMSYN1_0791	CDS	atpG	F0F1 ATP synthase subunit gamma		Metabolism	Membrane Transport	Other Transport	???	ATPase	Essential		468022	468865	843	-1	Essential			Essential	20	0.0237248	4	0.00474496	4	0.00474496	1	2.83573e-12	3.20515e-22	1.13027e-10
JCVISYN3A_0792	MMSYN1_0792	CDS	atpA	F0F1 ATP synthase subunit alpha		Metabolism	Membrane Transport	Other Transport	???	ATPase	Essential		468866	470444	1578	-1	Essential			Essential	33	0.0209125	0	0	1	0.000633714	1	0	0	0
JCVISYN3A_0793	MMSYN1_0793	CDS	atpD	F0F1 ATP synthase subunit delta		Metabolism	Membrane Transport	Other Transport	???	ATPase	Essential		470455	471001	546	-1	Essential			Essential	3	0.00549451	1	0.0018315	1	0.0018315	1	3.34589e-10	4.88064e-19	1.4587e-09
JCVISYN3A_0794	MMSYN1_0794	CDS	atpF	F0F1 ATP synthase subunit B		Metabolism	Membrane Transport	Other Transport	???	ATPase	Essential		471002	471548	546	-1	Essential			Essential	8	0.014652	2	0.003663	0	0	1	5.42268e-09	3.15164e-19	5.81196e-11
JCVISYN3A_0795	MMSYN1_0795	CDS	atpE	F0F1 ATP synthase subunit C		Metabolism	Membrane Transport	Other Transport	???	ATPase	Essential		471576	471882	306	-1	Essential			Essential	12	0.0392157	2	0.00653595	0	0	0.99978	0.000219255	2.48856e-10	1.13475e-06
JCVISYN3A_0796	MMSYN1_0796	CDS	atpB	F0F1 ATP synthase subunit A		Metabolism	Membrane Transport	Other Transport	???	ATPase	Essential		471911	472775	864	-1	Essential			Essential	21	0.0243056	2	0.00231481	3	0.00347222	1	4.21885e-15	8.00331e-27	1.89704e-12
JCVISYN3A_0797	MMSYN1_0797	CDS	0797	Uncharacterized protein		Unclear	No Kegg ortholog	Function unknown	???				472774	473173	399	-1	Essential			Essential	17	0.0426065	6	0.0150376	3	0.0075188	0.800877	0.198733	7.7546e-05	0.000312503
JCVISYN3A_0798	MMSYN1_0798	CDS	upp	Uracil phosphoribosyltransferase	K00761	Metabolism	Central Carbon Metabolism	Nucleotide metabolism	upp, UPRT; uracil phosphoribosyltransferase	UPPRT	Essential		473312	473936	624	-1	Essential			Essential	13	0.0208333	1	0.00160256	0	0	1	1.06486e-11	2.49534e-23	2.34335e-12
JCVISYN3A_0799	MMSYN1_0799	CDS	glyA	Serine hydroxymethyltransferase	K00600	Metabolism	Central Carbon Metabolism	Other central metabolism enzymes	glyA, SHMT; glycine hydroxymethyltransferase	GHMT	Essential		474035	475277	1242	-1	Quasiessential			Quasiessential	118	0.0950081	51	0.0410628	3	0.00241546	2.23985e-38	1	0	0
JCVISYN3A_0800	MMSYN1_0800	CDS	rpiB	Ribose 5-phosphate isomerase B	K01808	Metabolism	Central Carbon Metabolism	Pentose phosphate metabolism	rpiB; ribose 5-phosphate isomerase B	RPI	Essential		475260	475704	444	-1	Quasiessential			Quasiessential	63	0.141892	30	0.0675676	6	0.0135135	1.38768e-28	0.508222	0.491778	1.34278e-28
JCVISYN3A_0803	MMSYN1_0803	CDS	rpoC	DNA-directed RNA polymerase subunit beta'	K03046	Genetic Information Processing	Transcription	Transcription machinery	rpoC; DNA-directed RNA polymerase subunit beta'				475871	479639	3768	-1	Essential			Essential	16	0.00424628	0	0	0	0	1	0	0	0
JCVISYN3A_0804	MMSYN1_0804	CDS	rpoB	DNA-directed RNA polymerase subunit beta	K03043	Genetic Information Processing	Transcription	Transcription machinery	rpoB; DNA-directed RNA polymerase subunit beta				479650	483526	3876	-1	Essential			Essential	25	0.00644995	6	0.00154799	0	0	1	0	0	0
JCVISYN3A_0805	MMSYN1_0805	CDS	0805	Uncharacterized protein		Unclear	No Kegg ortholog	Function unknown	???				483515	484691	1176	-1	Essential			Essential	33	0.0280612	16	0.0136054	1	0.00085034	0.999622	0.000377519	0	0
JCVISYN3A_0806	MMSYN1_0806	CDS	rplG	50S ribosomal protein L7/L12	K02935	Genetic Information Processing	Translation	Ribosome	RP-L7, MRPL12, rplL; large subunit ribosomal protein L7/L12				484861	485230	369	-1	Essential			Essential	4	0.0108401	2	0.00542005	1	0.00271003	0.999984	1.3544e-05	2.88458e-11	2.12976e-06
JCVISYN3A_0807	MMSYN1_0807	CDS	rplJ	50S ribosomal protein L10	K02864	Genetic Information Processing	Translation	Ribosome	RP-L10, MRPL10, rplJ; large subunit ribosomal protein L10				485298	485796	498	-1	Essential			Essential	2	0.00401606	0	0	0	0	1	1.72257e-10	7.22161e-20	4.19235e-10
JCVISYN3A_0809	MMSYN1_0809	CDS	rplA	50S ribosomal protein L1	K02863	Genetic Information Processing	Translation	Ribosome	RP-L1, MRPL1, rplA; large subunit ribosomal protein L1				486022	486703	681	-1	Quasiessential			Quasiessential	60	0.0881057	22	0.0323054	1	0.00146843	4.60359e-14	1	5.62939e-12	2.59154e-25
JCVISYN3A_0810	MMSYN1_0810	CDS	rplK	50S ribosomal protein L11	K02867	Genetic Information Processing	Translation	Ribosome	RP-L11, MRPL11, rplK; large subunit ribosomal protein L11				486702	487131	429	-1	Quasiessential			Quasiessential	18	0.041958	8	0.018648	0	0	0.0546201	0.94538	6.78629e-09	3.92083e-10
JCVISYN3A_0813	MMSYN1_0813	CDS	galE	UDP-glucose 4-epimerase GalE	K01784	Metabolism	Central Carbon Metabolism	Carbohydrate metabolism	galE, GALE; UDP-glucose 4-epimerase	UDPG4E	Essential		487641	488640	999	1	Essential			Essential	25	0.025025	7	0.00700701	1	0.001001	1	1.22272e-11	0	0
JCVISYN3A_0814	MMSYN1_0814	CDS	glf	UDP-galactopyranose mutase	K01854	Metabolism	Biosynthesis	Lipid metabolism	glf; UDP-galactopyranose mutase	UDPGALM	Essential		488653	489841	1188	1	Essential			Essential	19	0.0159933	7	0.00589226	0	0	1	2.9976e-15	0	0
JCVISYN3A_0817	MMSYN1_0817	CDS	whiA	Uncharacterized DNA-binding protein	K09762	Genetic Information Processing	Transcription	Transcription factors	K09762; uncharacterized protein				490470	491400	930	-1	Quasiessential			Quasiessential	60	0.0645161	39	0.0419355	5	0.00537634	7.5467e-30	1	7.89688e-11	5.95954e-40
JCVISYN3A_0818	MMSYN1_0818	CDS	lgt	Diacylglyceryl transferase	K13292	Metabolism	Biosynthesis	Lipid metabolism	lgt, umpA; phosphatidylglycerol:prolipoprotein diacylglycerol transferase				491412	492843	1431	-1	Essential			Essential	44	0.0307477	9	0.00628931	0	0	1	0	0	0
JCVISYN3A_0819	MMSYN1_0819	CDS	trx	Thioredoxin-disulfide reductase	K00384	Metabolism	Biosynthesis	Cofactor biosynthesis	trxB, TRR; thioredoxin reductase (NADPH)	TRDR	Essential		492851	493784	933	-1	Essential			Essential	22	0.0235798	3	0.00321543	3	0.00321543	1	3.33067e-15	3.69409e-28	1.10911e-13
JCVISYN3A_0820	MMSYN1_0820	CDS	lgt	Diacylglyceryl transferase	K13292	Metabolism	Biosynthesis	Lipid metabolism	lgt, umpA; phosphatidylglycerol:prolipoprotein diacylglycerol transferase				493767	495348	1581	-1	Essential			Essential	9	0.0056926	0	0	1	0.000632511	1	0	0	0
JCVISYN3A_0821	MMSYN1_0821	CDS	hpr	HPr(Ser) kinase/phosphatase	K06023	Metabolism	Membrane Transport	Carbohydrates	hprK, ptsK; HPr kinase/phosphorylase				495358	496300	942	-1	Nonessential	Nonessential		Nonessential	48	0.0509554	20	0.0212314	21	0.022293	1.03568e-18	8.37135e-13	0.999999	1.23717e-06
JCVISYN3A_0822	MMSYN1_0822	CDS	folT	Uncharacterized ECF transporter S component		Metabolism	Membrane Transport	Cofactor	???	5FTHFabc	Essential		496383	497058	675	-1	Quasiessential			Quasiessential	57	0.0844444	22	0.0325926	4	0.00592593	3.53123e-14	1	1.13934e-07	4.02329e-21
JCVISYN3A_0823	MMSYN1_0823	CDS	folC	Dihydrofolate synthase	K11754	Metabolism	Biosynthesis	Cofactor biosynthesis	folC; dihydrofolate synthase / folylpolyglutamate synthase	5FTHFPGS	Essential		497074	498190	1116	-1	Quasiessential			Quasiessential	78	0.0698925	45	0.0403226	6	0.00537634	1.54825e-33	1	9.3725e-13	1.4511e-45
JCVISYN3A_0824	MMSYN1_0824	CDS	uvrA	Excinuclease ABC subunit A	K03701	Genetic Information Processing	DNA Maintenance	Nucleotide excision repair	uvrA; excinuclease ABC subunit A				498182	501023	2841	-1	Nonessential	Quasiessential		Quasiessential	309	0.108765	188	0.0661739	64	0.0225273	1.00518e-211	4.87672e-39	1	2.06118e-173
JCVISYN3A_0825	MMSYN1_0825	CDS	uvrB	Excinuclease ABC subunit B	K03702	Genetic Information Processing	DNA Maintenance	Nucleotide excision repair	uvrB; excinuclease ABC subunit B				501031	503029	1998	-1	Nonessential	Quasiessential		Quasiessential	236	0.118118	155	0.0775776	67	0.0335335	2.95785e-207	2.61941e-58	1	1.1292e-149
JCVISYN3A_0826	MMSYN1_0826	CDS	yqeN	DNA polymerase III subunit delta	K02340	Genetic Information Processing	DNA Maintenance	DNA replication complex	DPO3D1, holA; DNA polymerase III subunit delta				503313	504264	951	1	Essential			Essential	1	0.00105152	0	0	0	0	1	0	0	0
JCVISYN3A_0827	MMSYN1_0827	CDS	0827	Uncharacterized protein		Unclear	No Kegg ortholog	Function unknown	???				504266	505733	1467	1	Quasiessential			Quasiessential	81	0.0552147	41	0.0279482	18	0.0122699	5.66044e-22	0.969861	0.0301393	1.75904e-23
JCVISYN3A_0828	MMSYN1_0828	tRNA	Cys	tRNA-Cys	K14222	Genetic Information Processing	Non-coding RNA	tRNA	tRNA-Cys; tRNA Cys				505898	505973	75	1	Essential			Essential	0	0	0	0	0	0	0.963081	0.0218465	0.000334313	0.0147379
JCVISYN3A_0830	MMSYN1_0830	CDS	0830	Uncharacterized protein		Unclear	No Kegg ortholog	Function unknown	???				506110	506371	261	1	Nonessential	Nonessential		Nonessential	7	0.0268199	7	0.0268199	8	0.0306513	4.89533e-10	8.77238e-07	0.999441	0.000557728
JCVISYN3A_0831	MMSYN1_0831	CDS	prs	Phosphoribosylpyrophosphate synthetase	K00948	Metabolism	Central Carbon Metabolism	Pentose phosphate metabolism	PRPS, prsA; ribose-phosphate pyrophosphokinase	PRPPS	Essential		506550	507585	1035	1	Essential			Essential	16	0.0154589	1	0.000966184	2	0.00193237	1	0	0	0
JCVISYN3A_0832	MMSYN1_0832	CDS	pth	Aminoacyl-tRNA hydrolase	K01056	Genetic Information Processing	Translation	Translation factors	PTH1, pth, spoVC; peptidyl-tRNA hydrolase, PTH1 family				508010	508571	561	1	Essential			Essential	18	0.0320856	6	0.0106952	2	0.00356506	0.999807	0.000192757	3.80583e-12	1.97404e-08
JCVISYN3A_0833	MMSYN1_0833	CDS	rplI	50S ribosomal protein L9	K02939	Genetic Information Processing	Translation	Ribosome	RP-L9, MRPL9, rplI; large subunit ribosomal protein L9				508691	509135	444	1	Nonessential	Quasiessential		Quasiessential	18	0.0405405	13	0.0292793	7	0.0157658	3.96536e-09	0.0395474	0.960452	9.63032e-08
JCVISYN3A_0834	MMSYN1_0834	CDS	dnaC	Replicative DNA helicase	K02314	Genetic Information Processing	DNA Maintenance	DNA replication complex	dnaB; replicative DNA helicase				509137	510454	1317	1	Essential			Essential	17	0.0129081	2	0.0015186	0	0	1	0	0	0
JCVISYN3A_0835	MMSYN1_0835	CDS	0835	Uncharacterized lipoprotein		Unclear	No Kegg ortholog	Function unknown	???				510520	511828	1308	1	Essential			Essential	19	0.014526	8	0.00611621	8	0.00611621	1	2.22045e-16	4.84163e-29	2.18048e-13
JCVISYN3A_0836	MMSYN1_0836	CDS	ecfS	Uncharacterized ECF transporter S component		Metabolism	Membrane Transport	Cofactor	???	COAabc	Essential		511969	512896	927	1	Essential			Essential	1	0.00107875	1	0.00107875	1	0.00107875	1	0	0	3.33067e-16
JCVISYN3A_0837	MMSYN1_0837	CDS	cysRS	Cysteine--tRNA ligase	K01883	Genetic Information Processing	Translation	tRNA loading	CARS, cysS; cysteinyl-tRNA synthetase	CYSTRS	Essential		512904	514230	1326	1	Essential			Essential	3	0.00226244	1	0.000754148	0	0	1	0	0	0
JCVISYN3A_0838	MMSYN1_0838	CDS	rlmB	23S rRNA (guanosine(2251)-2'-O)-methyltransferase	K03218	Genetic Information Processing	Translation	Ribosome biogenesis	rlmB; 23S rRNA (guanosine2251-2'-O)-methyltransferase				514231	514966	735	1	Nonessential	Nonessential		Nonessential	54	0.0734694	30	0.0408163	24	0.0326531	1.10964e-42	1.05478e-20	1	1.05201e-22
JCVISYN3A_0932		CDS	rpmG	50S ribosomal protein L33	K02913	Genetic Information Processing	Translation	Ribosome	RP-L33, MRPL33, rpmG; large subunit ribosomal protein L33				515026	515188	162	1	Quasiessential			Quasiessential	8	0.0493827	3	0.0185185	0	0	0.326162	0.673412	0.000286869	0.000138943
JCVISYN3A_0839	MMSYN1_0839	CDS	secE	Preprotein translocase subunit	K03073	Genetic Information Processing	Folding, Sorting and Degradation	Protein export	secE; preprotein translocase subunit SecE				515187	515511	324	1	Essential			Essential	6	0.0185185	3	0.00925926	1	0.00308642	0.998385	0.00160152	2.17456e-08	1.35562e-05
JCVISYN3A_0840	MMSYN1_0840	CDS	nusG	Antitermination protein	K02601	Genetic Information Processing	Transcription	Transcription factors	nusG; transcriptional antiterminator NusG				515527	516169	642	1	Quasiessential			Quasiessential	51	0.0794393	21	0.0327103	3	0.0046729	1.33103e-13	1	1.76596e-08	2.35054e-21
JCVISYN3A_0851	MMSYN1_0851	CDS	0851	Uncharacterized lipoprotein		Unclear	No Kegg ortholog	Function unknown	???				516674	516857	183	-1	Nonessential	Nonessential		Nonessential	23	0.125683	14	0.0765027	17	0.0928962	5.41552e-34	8.95585e-21	1	6.04691e-14
JCVISYN3A_0852	MMSYN1_0852	CDS	0852	Uncharacterized protein		Unclear	No Kegg ortholog	Function unknown	???				517022	517253	231	-1	Nonessential	Nonessential		Nonessential	15	0.0649351	12	0.0519481	11	0.047619	2.13993e-21	1.61472e-11	1	1.32527e-10
JCVISYN3A_0853	MMSYN1_0853	CDS	0853	Uncharacterized protein		Unclear	No Kegg ortholog	Function unknown	???				517242	517962	720	-1	Nonessential	Nonessential		Nonessential	46	0.0638889	32	0.0444444	28	0.0388889	2.95879e-51	1.43358e-26	1	2.06391e-25
JCVISYN3A_0859	MMSYN1_0859	CDS	topA	DNA topoisomerase I	K03168	Genetic Information Processing	DNA Maintenance	DNA replication control	topA; DNA topoisomerase I				518164	520126	1962	1	Essential			Essential	14	0.00713558	1	0.000509684	0	0	1	0	0	0
JCVISYN3A_0870	MMSYN1_0870	CDS	0870	Uncharacterized C4-dicarboxylate ABC transporter		Metabolism	Membrane Transport	Other Transport	???				520381	522148	1767	-1	Quasiessential			Quasiessential	39	0.0220713	34	0.0192417	1	0.000565931	9.83088e-08	1	0	0
JCVISYN3A_0872	MMSYN1_0872	CDS	ychF	Uncharacterized ATPase	K06942	Genetic Information Processing	Translation	Ribosome biogenesis	ychF; ribosome-binding ATPase				522216	523311	1095	-1	Quasiessential			Quasiessential	91	0.083105	56	0.0511416	8	0.00730594	3.02014e-47	1	1.40134e-09	4.23225e-56
JCVISYN3A_0873	MMSYN1_0873	CDS	0873	Uncharacterized protein		Unclear	No Kegg ortholog	Function unknown	???				523346	523547	201	-1	Quasiessential			Quasiessential	6	0.0298507	4	0.0199005	0	0	0.14347	0.856444	7.326e-05	1.22724e-05
JCVISYN3A_0874	MMSYN1_0874	CDS	rsmG	16S rRNA (guanine(527)-N(7))-methyltransferase	K03501	Genetic Information Processing	Translation	Ribosome biogenesis	gidB, rsmG; 16S rRNA (guanine527-N7)-methyltransferase				523548	524244	696	-1	Nonessential	Nonessential		Nonessential	35	0.0502874	25	0.0359195	19	0.0272989	4.42648e-31	2.1093e-14	1	2.09855e-17
JCVISYN3A_0875	MMSYN1_0875	CDS	pgsA	CDP-diacylglycerol--glycerol-3-phosphate 3-phosphatidyltransferase	K00995	Metabolism	Biosynthesis	Lipid metabolism	pgsA, PGS1; CDP-diacylglycerol---glycerol-3-phosphate 3-phosphatidyltransferase	PGSA	Essential		524243	524840	597	-1	Essential			Essential	2	0.00335008	2	0.00335008	1	0.00167504	1	5.69196e-10	1.01732e-19	1.7873e-10
JCVISYN3A_0876	MMSYN1_0876	CDS	0876	Uncharacterized amino acid permease		Metabolism	Membrane Transport	Amino acid and peptides	???	AA permease 1	Nonessential	2.02442	524941	526522	1581	-1	Nonessential	Nonessential		Nonessential	130	0.0822264	86	0.054396	86	0.054396	7.72251e-166	2.34394e-92	1	3.29468e-74
JCVISYN3A_0877	MMSYN1_0877	CDS	0877	Uncharacterized protein		Metabolism	Membrane Transport	Cofactor	???	RIBFLVabc	Essential		526668	527349	681	-1	Essential			Essential	13	0.0190896	2	0.00293686	0	0	1	1.38954e-11	3.11626e-24	2.24265e-13
JCVISYN3A_0878	MMSYN1_0878	CDS	0878	Uncharacterized amino acid permease		Metabolism	Membrane Transport	Amino acid and peptides	???	AA permease 2	Nonessential	2.02442	527320	528859	1539	-1	Nonessential	Quasiessential		Quasiessential	139	0.0903184	83	0.0539311	28	0.0181936	1.37744e-82	6.28567e-12	1	2.1914e-71
JCVISYN3A_0879	MMSYN1_0879	CDS	corA	Magnesium transporter	K03284	Metabolism	Membrane Transport	Inorganic	corA; magnesium transporter	CA2abc	Essential		528916	531574	2658	-1	Essential			Essential	65	0.0244545	15	0.00564334	0	0	1	0	0	0
JCVISYN3A_0881	MMSYN1_0881	CDS	0881	Uncharacterized MFS transporter		Metabolism	Membrane Transport	Other Transport	???				531972	533400	1428	-1	Essential			Essential	89	0.0623249	8	0.00560224	2	0.00140056	1	0	0	1.11022e-16
JCVISYN3A_0885	MMSYN1_0885	CDS	mnmG	tRNA uridine(34) 5-carboxymethylaminomethyl synthesis enzyme	K03495	Genetic Information Processing	Translation	tRNA biogenesis	gidA, mnmG, MTO1; tRNA uridine 5-carboxymethylaminomethyl modification enzyme				533863	535753	1890	-1	Nonessential	Quasiessential		Quasiessential	284	0.150265	189	0.1	101	0.0534392	5.61554e-300	7.93506e-108	1	7.07688e-193
JCVISYN3A_0886	MMSYN1_0886	CDS	gltP	Proton-glutamate symporter	K11102	Metabolism	Membrane Transport	Amino acid and peptides	gltP, gltT; proton glutamate symport protein	GltP	Nonessential	2.02944	535900	537478	1578	-1	Quasiessential			Quasiessential	146	0.0925222	67	0.0424588	3	0.00190114	2.78329e-51	1	0	0
JCVISYN3A_0887	MMSYN1_0887	CDS	cdr	Coenzyme A Disulfide Reductase	K08255	Metabolism	Energy Metabolism	Other	cdr; CoA-disulfide reductase				537497	538841	1344	-1	Quasiessential			Quasiessential	100	0.0744048	62	0.046131	1	0.000744048	1.00324e-49	1	0	0
JCVISYN3A_0906	MMSYN1_0906	CDS	0906	Uncharacterized protein		Unclear	No Kegg ortholog	Function unknown	???				539820	540537	717	-1	Essential			Essential	41	0.0571827	3	0.0041841	0	0	1	4.5872e-11	2.3376e-24	5.09592e-14
JCVISYN3A_0907	MMSYN1_0907	CDS	0907	Uncharacterized hydrolase		Unclear	No Kegg ortholog	Function unknown	???				540536	541331	795	-1	Nonessential	Nonessential	Quasiessential	Quasiessential	61	0.0767296	32	0.0402516	29	0.036478	7.11118e-50	1.25203e-26	1	5.6797e-24
JCVISYN3A_0908	MMSYN1_0908	CDS	yidC	Membrane protein insertase	K03217	Genetic Information Processing	Folding, Sorting and Degradation	Protein export	yidC, spoIIIJ, OXA1, ccfA; YidC/Oxa1 family membrane protein insertase				541407	542598	1191	-1	Essential			Essential	5	0.00419815	3	0.00251889	3	0.00251889	1	0	0	0
JCVISYN3A_0909	MMSYN1_0909	CDS	rnpA	Ribonuclease P protein component	K03536	Genetic Information Processing	Translation	tRNA biogenesis	rnpA; ribonuclease P protein component				542615	542945	330	-1	Essential			Essential	1	0.0030303	0	0	0	0	0.999999	2.89041e-07	1.22149e-13	4.226e-07
JCVISYN3A_0910	MMSYN1_0910	CDS	rpmH	50S ribosomal protein L34	K02914	Genetic Information Processing	Translation	Ribosome	RP-L34, MRPL34, rpmH; large subunit ribosomal protein L34				542951	543086	135	-1	Nonessential	Quasiessential		Quasiessential	13	0.0962963	10	0.0740741	7	0.0518519	6.15703e-17	1.2314e-07	1	5.00004e-10
