# Supplementary material for: Essential metabolism for a minimal cell
Source: eLife. 2019 Jan 18;8:e36842. doi: 10.7554/eLife.36842 (PMC6609329; doi:10.7554/eLife.36842)
Supplement: Supplementary file 4. [file elife-36842-supp4.xlsx]

## Sheet: Reactions
Reaction number	Reaction equation	Reaction ID	EC number	Subsystem	Reversibility	GPR rule
S001	[c]: D-glucose 6-phosphate <==> D-fructose 6-phosphate	PGI	5.3.1.9	Central metabolism	R	MMSYN1_0445
S002	[c]: D-fructose 6-phosphate + ATP --> ADP + D-fructose 1,6-bisphosphate + H+	PFK	2.7.1.11	Central metabolism	I	MMSYN1_0220
S003	[c]: D-fructose 1,6-bisphosphate <==> dihydroxyacetone phosphate + Glyceraldehyde 3-phosphate	FBA	4.1.2.13	Central metabolism	R	MMSYN1_0131
S004	[c]: dihydroxyacetone phosphate <==> Glyceraldehyde 3-phosphate	TPI	5.3.1.1	Central metabolism	R	MMSYN1_0727
S005	[c]: NAD+ + Phosphate + Glyceraldehyde 3-phosphate <==> NADH + H+ + 3-Phospho-D-glyceroyl phosphate	GAPD	1.2.1.12	Central metabolism	R	MMSYN1_0607
S006	[c]: NADP+ + Glyceraldehyde 3-phosphate + H2O --> NADPH + (2) H+ + 3-Phospho-D-glycerate	GAPDP	1.2.1.9	Central metabolism	I	MMSYN1_0451
S007	[c]: ADP + 3-Phospho-D-glyceroyl phosphate <==> 3-phospho-D-glycerate + ATP	PGK	2.7.2.3	Central metabolism	R	MMSYN1_0606
S008	[c]: 3-phospho-D-glycerate <==> D-Glycerate 2-phosphate	PGM	5.4.2.12	Central metabolism	R	MMSYN1_0729
S009	[c]: D-Glycerate 2-phosphate <==> phosphoenolpyruvate + H2O	ENO	4.2.1.11	Central metabolism	R	MMSYN1_0213
S010	[c]: ADP + phosphoenolpyruvate + H+ --> ATP + pyruvate	PYK	2.7.1.40	Central metabolism	I	MMSYN1_0221
S011	[c]: N-acetyl-D-mannosamine + ATP --> ADP + N-acetyl-D-mannosamine 6-phosphate + H+	AMANK	2.7.1.60	Central metabolism	I	MMSYN1_0495
S012	[c]: N-acetyl-D-mannosamine 6-phosphate <==> N-acetyl-D-glucosamine 6-phosphate	AMANPEr	5.1.3.9	Central metabolism	R	MMSYN1_0494
S013	[c]: N-acetyl-D-glucosamine 6-phosphate + H2O --> D-glucosamine 6-phosphate + acetate	AGDC	3.5.1.25	Central metabolism	I	MMSYN1_0493
S014	[c]: D-glucosamine 6-phosphate + H2O <==> D-fructose 6-phosphate + NH3 + H+	G6PDA	3.5.99.6	Central metabolism	R	MMSYN1_0726
S015	[c]: D-mannose 6-phosphate <==> D-fructose 6-phosphate	MAN6PI	5.3.1.8	Central metabolism	R	MMSYN1_0435
S016	[c]: NADH + H+ + pyruvate <==> L-lactate + NAD+	LDH_L	1.1.1.27	Central metabolism	R	MMSYN1_0475
S017	[c]: lipoyl-PdhC + H+ + pyruvate --> S-acetyldihydrolipoyl-PdhC + CO2	PDH_E1	1.2.4.1	Central metabolism	I
S018	[c]: S-acetyldihydrolipoyl-PdhC + CoA --> acetyl-CoA + dihydrolipoyl-PdhC	PDH_E2	2.3.1.12	Central metabolism	I	MMSYN1_0227
S019	[c]: acetaldehyde + lipoyl-PdhC + CoA --> acetyl-CoA + dihydrolipoyl-PdhC	PDH_acald	-	Central metabolism	I	MMSYN1_0227
S020	[c]: dihydrolipoyl-PdhC + NAD+ --> lipoyl-PdhC + NADH + H+	PDH_E3	1.8.1.4	Central metabolism	I	MMSYN1_0228
S021	[c]: acetyl-CoA + Phosphate <==> acetyl phosphate + CoA	PTAr	2.3.1.8	Central metabolism	R	MMSYN1_0229
S022	[c]: ADP + acetyl phosphate <==> acetate + ATP	ACKr	2.7.2.1	Central metabolism	R	MMSYN1_0230
S023	[c]: (2) NADH + O2 + (2) H+ --> (2) H2O + (2) NAD+	NOX	1.6.3.4	Central metabolism	I
S024	[c]: D-erythrose 4-phosphate + D-fructose 6-phosphate <==> sedoheptulose 7-phosphate + Glyceraldehyde 3-phosphate	TALA	2.2.1.2	Central metabolism	R
S025	[c]: sedoheptulose 7-phosphate + Glyceraldehyde 3-phosphate <==> D-xylulose 5-phosphate + D-ribose 5-phosphate	TKT1	2.2.1.1	Central metabolism	R	MMSYN1_0316
S026	[c]: D-fructose 6-phosphate + Glyceraldehyde 3-phosphate <==> D-xylulose 5-phosphate + D-erythrose 4-phosphate	TKT2	2.2.1.1	Central metabolism	R	MMSYN1_0316
S027	[c]: D-xylulose 5-phosphate <==> D-ribulose 5-phosphate	RPE	5.1.3.1	Central metabolism	R	MMSYN1_0262
S028	[c]: D-ribulose 5-phosphate <==> D-ribose 5-phosphate	RPI	5.3.1.6	Central metabolism	R	MMSYN1_0800
S029	[c]: D-ribose 5-phosphate + ATP <==> AMP + 5-phospho-alpha-D-ribose 1-diphosphate + H+	PRPPS	2.7.6.1	Central metabolism	R	MMSYN1_0831
S030	[c]: D-ribose 1-phosphate <==> D-ribose 5-phosphate	PPM	5.4.2.7	Central metabolism	R	MMSYN1_0733
S031	[c]: 2-deoxy-D-ribose 1-phosphate <==> 2-deoxy-D-ribose 5-phosphate	PPM2	5.4.2.7	Central metabolism	R	MMSYN1_0733
S032	[c]: 2-deoxy-D-ribose 5-phosphate <==> acetaldehyde + Glyceraldehyde 3-phosphate	DRPA	4.1.2.4	Central metabolism	R	MMSYN1_0732
S033	[c]: adenine + 5-phospho-alpha-D-ribose 1-diphosphate --> AMP + Diphosphate	ADPT	2.4.2.7	Nucleotide metabolism	I	MMSYN1_0413
S034	[c]: adenosine + Phosphate <==> D-ribose 1-phosphate + adenine	PUNP1	2.4.2.1	Nucleotide metabolism	R	MMSYN1_0747
S035	[c]: AMP + ATP <==> (2) ADP	ADK1	2.7.4.3	Nucleotide metabolism	R	MMSYN1_0651
S036	[c]: ADP + reduced thioredoxin --> dADP + H2O + oxidized thioredoxin	RNDR1	1.17.4.1	Nucleotide metabolism	I	MMSYN1_0771 AND MMSYN1_0772 AND MMSYN1_0773
S037	[c]: oxidized thioredoxin + H+ + NADPH --> NADP+ + reduced thioredoxin	TRDR	1.8.1.9	Nucleotide metabolism	I	MMSYN1_0819 AND MMSYN1_0065
S038	[c]: H2O + Diphosphate --> (2) Phosphate + H+	PPA	3.6.1.1	Nucleotide metabolism	I	MMSYN1_0344
S039	[c]: deoxyadenosine + Phosphate <==> 2-deoxy-D-ribose 1-phosphate + adenine	PUNP2	2.4.2.1	Nucleotide metabolism	R	MMSYN1_0747
S040	[c]: deoxyadenosine + ATP --> ADP + H+ + dAMP	DADNK	2.7.1.76	Nucleotide metabolism	I	MMSYN1_0330 OR MMSYN1_0382
S041	[c]: dAMP + ATP <==> dADP + ADP	DADK	2.7.4.11	Nucleotide metabolism	R	MMSYN1_0651
S042	[c]: phosphoenolpyruvate + dADP + H+ --> dATP + pyruvate	PYK5	2.7.1.40	Nucleotide metabolism	I	MMSYN1_0221
S043	[c]: dADP + 3-Phospho-D-glyceroyl phosphate <==> 3-phospho-D-glycerate + dATP	PGK2	2.7.2.3	Nucleotide metabolism	R	MMSYN1_0606
S044	[c]: 5-phospho-alpha-D-ribose 1-diphosphate + guanine --> GMP + Diphosphate	GUAPRT	2.4.2.8	Nucleotide metabolism	I	MMSYN1_0216
S045	[c]: guanosine + Phosphate <==> D-ribose 1-phosphate + guanine	PUNP3	2.4.2.1	Nucleotide metabolism	R	MMSYN1_0747
S046	[c]: GMP + ATP <==> ADP + GDP	GK1	2.7.4.8	Nucleotide metabolism	R	MMSYN1_0203
S047	[c]: reduced thioredoxin + GDP --> H2O + oxidized thioredoxin + dGDP	RNDR2	1.17.4.1	Nucleotide metabolism	I	MMSYN1_0771 AND MMSYN1_0772 AND MMSYN1_0773
S048	[c]: phosphoenolpyruvate + H+ + GDP --> GTP + pyruvate	PYK3	2.7.1.40	Nucleotide metabolism	I	MMSYN1_0221
S049	[c]: GDP + 3-Phospho-D-glyceroyl phosphate <==> GTP + 3-phospho-D-glycerate	PGK3	2.7.2.3	Nucleotide metabolism	R	MMSYN1_0606
S050	[c]: deoxyguanosine + Phosphate <==> 2-deoxy-D-ribose 1-phosphate + guanine	PUNP4	2.4.2.1	Nucleotide metabolism	R	MMSYN1_0747
S051	[c]: deoxyguanosine + ATP --> ADP + H+ + dGMP	DGSNK	2.7.1.113	Nucleotide metabolism	I	MMSYN1_0330 OR MMSYN1_0382
S052	[c]: ATP + dGMP <==> ADP + dGDP	DGK1	2.7.4.8	Nucleotide metabolism	R	MMSYN1_0203
S053	[c]: phosphoenolpyruvate + dGDP + H+ --> dGTP + pyruvate	PYK6	2.7.1.40	Nucleotide metabolism	I	MMSYN1_0221
S054	[c]: dGDP + 3-Phospho-D-glyceroyl phosphate <==> 3-phospho-D-glycerate + dGTP	PGK4	2.7.2.3	Nucleotide metabolism	R	MMSYN1_0606
S055	[c]: uracil + 5-phospho-alpha-D-ribose 1-diphosphate --> UMP + Diphosphate	UPPRT	2.4.2.9	Nucleotide metabolism	I	MMSYN1_0798
S056	[c]: UMP + ATP <==> ADP + UDP	UMPK	2.7.4.22	Nucleotide metabolism	R	MMSYN1_0537
S057	[c]: phosphoenolpyruvate + H+ + UDP --> UTP + pyruvate	PYK2	2.7.1.40	Nucleotide metabolism	I	MMSYN1_0221
S058	[c]: reduced thioredoxin + UDP --> H2O + oxidized thioredoxin + dUDP	RNDR4	1.17.4.1	Nucleotide metabolism	I	MMSYN1_0771 AND MMSYN1_0772 AND MMSYN1_0773
S059	[c]: CMP + ATP <==> ADP + CDP	CYTK1	2.7.4.25	Nucleotide metabolism	R	MMSYN1_0347
S060	[c]: phosphoenolpyruvate + CDP + H+ --> CTP + pyruvate	PYK4	2.7.1.40	Nucleotide metabolism	I	MMSYN1_0221
S061	[c]: CDP + reduced thioredoxin --> H2O + oxidized thioredoxin + dCDP	RNDR3	1.17.4.1	Nucleotide metabolism	I	MMSYN1_0771 AND MMSYN1_0772 AND MMSYN1_0773
S062	[c]: deoxycytidine + ATP --> ADP + dCMP + H+	DCYTK	2.7.1.74	Nucleotide metabolism	I	MMSYN1_0330 OR MMSYN1_0382
S063	[c]: dCMP + ATP <==> ADP + dCDP	CYTK2	2.7.4.25	Nucleotide metabolism	R	MMSYN1_0347
S064	[c]: phosphoenolpyruvate + dCDP + H+ --> dCTP + pyruvate	PYK7	2.7.1.40	Nucleotide metabolism	I	MMSYN1_0221
S065	[c]: deoxyuridine + ATP --> ADP + dUMP + H+	DURIK1	2.7.1.21	Nucleotide metabolism	I	MMSYN1_0140
S066	[c]: thymidine + ATP --> ADP + dTMP + H+	TMDK1	2.7.1.21	Nucleotide metabolism	I	MMSYN1_0140
S067	[c]: dTMP + ATP <==> ADP + dTDP	TMPK	2.7.4.9	Nucleotide metabolism	R	MMSYN1_0045
S068	[c]: phosphoenolpyruvate + dTDP + H+ --> dTTP + pyruvate	PYK8	2.7.1.40	Nucleotide metabolism	I	MMSYN1_0221
S069	[c]: phosphoenolpyruvate + dUDP + H+ --> dUTP + pyruvate	PYK9	2.7.1.40	Nucleotide metabolism	I	MMSYN1_0221
S070	[c]: ATP + UTP + L-glutamine + H2O --> ADP + CTP + L-glutamate + Phosphate + (2) H+	CTPS2	6.3.4.2	Nucleotide metabolism	I	MMSYN1_0129
S071	[c]: ATP + dUMP + L-glutamine + H2O --> ADP + dCMP + L-glutamate + Phosphate + (2) H+	CTPSDUMP	-	Nucleotide metabolism	I	MMSYN1_0129
S072	[c]: dCMP + H2O --> NH3 + dUMP	DCMPDA	3.5.4.12	Nucleotide metabolism	I	MMSYN1_0515
S073	[c]: dUTP + H2O --> dUMP + diphosphate + H+	DUTPDP	3.6.1.23	Nucleotide metabolism	I	MMSYN1_0447
S074	[c]: dCTP + H2O --> dCMP + diphosphate + H+	DCTPDP	3.6.1.12	Nucleotide metabolism	I
S075	[c]: dCTP + H2O --> dCDP + phosphate + H+	DCTPMP	3.6.1.15	Nucleotide metabolism	I
S076	[c]: dCDP + H2O --> dCMP + phosphate + H+	DCDPMP	3.6.1.12	Nucleotide metabolism	I
S077	[c]: CTP + H2O --> CMP + diphosphate + H+	CTPDP	3.6.1.65	Nucleotide metabolism	I
S078	[c]: dTMP + H2O --> thymidine + phosphate	NTD5	3.1.3.89	Nucleotide metabolism	I
S079	[c]: dUMP + H2O --> deoxyuridine + phosphate	NTD1	3.1.3.89	Nucleotide metabolism	I
S080	[c]: dGMP + H2O --> deoxyguanosine + phosphate	NTD8	3.1.3.89	Nucleotide metabolism	I
S081	[c]: dAMP + H2O --> deoxyadenosine + phosphate	NTD6	3.1.3.89	Nucleotide metabolism	I
S082	[c]: GMP + H2O --> guanosine + phosphate	NTD9	3.1.3.5	Nucleotide metabolism	I
S083	[c]: glycerol + ATP --> Glycerol 3-phosphate + ADP + H+	GLYK	2.7.1.30	Lipid metabolism	I	MMSYN1_0218
S084	[c]: apoprotein (acyl carrier protein) + CoA --> adenosine 3',5'-bisphosphate + acyl carrier protein + H+	ACPS	2.7.8.7	Lipid metabolism	I	MMSYN1_0513 AND MMSYN1_0621
S085	[c]: adenosine 3',5'-bisphosphate + H2O --> AMP + Phosphate	BPNT	3.1.3.7	Lipid metabolism	I	MMSYN1_0139
S086	[c]: fatty acid + ATP <==> acyl phosphate + ADP	FAKr	-	Lipid metabolism	R	MMSYN1_0420 AND MMSYN1_0616 AND MMSYN1_0617
S087	[c]: acyl phosphate + acyl carrier protein <==> ACP-R + phosphate	ACPPAT	2.3.1.n2	Lipid metabolism	R	MMSYN1_0419
S088	[c]: acyl phosphate + Glycerol 3-phosphate --> 1-acyl-glycerol 3-phosphate + phosphate	APG3PAT	2.3.1.n3	Lipid metabolism	I	MMSYN1_0117
S089	[c]: ACP-R + 1-acyl-glycerol 3-phosphate --> phosphatidic acid + acyl carrier protein	AGPAT	2.3.1.51	Lipid metabolism	I	MMSYN1_0512
S090	[c]: phosphatidic acid + CTP + H+ --> CDP-diacylglycerol + Diphosphate	DASYN	2.7.7.41	Lipid metabolism	I	MMSYN1_0304
S091	[c]: CDP-diacylglycerol + Glycerol 3-phosphate --> CMP + phosphatidylglycerol 3-phosphate + H+	PGSA	2.7.8.5	Lipid metabolism	I	MMSYN1_0875
S092	[c]: H2O + phosphatidylglycerol 3-phosphate --> Phosphate + phosphatidylglycerol	PGPP	3.1.3.27	Lipid metabolism	I	MMSYN1_0214
S093	[c]: (2) phosphatidylglycerol --> cardiolipin + glycerol	CLPNS	2.7.8.-	Lipid metabolism	I	MMSYN1_0147
S094	[c]: H2O + phosphatidic acid --> 1,2-diacylglycerol + Phosphate	PAPA	3.1.3.4	Lipid metabolism	I
S095	[c]: D-glucose 6-phosphate <==> D-glucose 1-phosphate	PGMT	5.4.2.5	Lipid metabolism	R	MMSYN1_0733
S096	[c]: D-glucose 1-phosphate + UTP + H+ <==> UDP-glucose + Diphosphate	GALU	2.7.7.9	Lipid metabolism	R	MMSYN1_0115
S097	[c]: UDP-glucose <==> UDP-galactose	UDPG4E	5.1.3.2	Lipid metabolism	R	MMSYN1_0813
S098	[c]: UDP-galactose <==> UDP-galactofuranose	UDPGALM	5.4.99.9	Lipid metabolism	R	MMSYN1_0814
S099	[c]: 1,2-diacylglycerol + UDP-galactofuranose --> Gal-DAG + H+ + UDP	DAGGALT	2.4.1.46	Lipid metabolism	I	MMSYN1_0114 OR MMSYN1_0697
S100	[c]: (88) UDP-galactofuranose --> UDP-galactan + (87) UDP + (87) H+	PSSYN	2.4.1.-	Lipid metabolism	I	MMSYN1_0113
S101	[c]: UDP-galactan + 1,2-diacylglycerol --> lipogalactan + H+ + UDP	DAGPST	2.4.1.-	Lipid metabolism	I	MMSYN1_0114
S102	[c]: Tetra-L-arginine + (3) H2O --> (4) L-arginine	ARG4P	3.4.-	Amino acid metabolism	I	MMSYN1_0133 OR MMSYN1_0305 OR MMSYN1_0444 OR MMSYN1_0479
S103	[c]: Tetra-L-aspartate + (3) H2O --> (4) L-aspartate	ASP4P	3.4.-	Amino acid metabolism	I	MMSYN1_0133 OR MMSYN1_0305 OR MMSYN1_0444 OR MMSYN1_0479
S104	[c]: Tetra-L-glutamate + (3) H2O --> (4) L-glutamate	GLU4P	3.4.-	Amino acid metabolism	I	MMSYN1_0133 OR MMSYN1_0305 OR MMSYN1_0444 OR MMSYN1_0479
S105	[c]: Tetra-glycine + (3) H2O --> (4) glycine	GLY4P	3.4.-	Amino acid metabolism	I	MMSYN1_0133 OR MMSYN1_0305 OR MMSYN1_0444 OR MMSYN1_0479
S106	[c]: Tetra-L-isoleucine + (3) H2O --> (4) L-isoleucine	ISO4P	3.4.-	Amino acid metabolism	I	MMSYN1_0133 OR MMSYN1_0305 OR MMSYN1_0444 OR MMSYN1_0479
S107	[c]: Tetra-L-alanine + (3) H2O --> (4) L-alanine	ALA4P	3.4.-	Amino acid metabolism	I	MMSYN1_0133 OR MMSYN1_0305 OR MMSYN1_0444 OR MMSYN1_0479
S108	[c]: Tetra-L-asparagine + (3) H2O --> (4) L-asparagine	ASN4P	3.4.-	Amino acid metabolism	I	MMSYN1_0133 OR MMSYN1_0305 OR MMSYN1_0444 OR MMSYN1_0479
S109	[c]: Tetra-L-leucine + (3) H2O --> (4) L-leucine	LEU4P	3.4.-	Amino acid metabolism	I	MMSYN1_0133 OR MMSYN1_0305 OR MMSYN1_0444 OR MMSYN1_0479
S110	[c]: Tetra-L-glutamine + (3) H2O --> (4) L-glutamine	GLN4P	3.4.-	Amino acid metabolism	I	MMSYN1_0133 OR MMSYN1_0305 OR MMSYN1_0444 OR MMSYN1_0479
S111	[c]: Tetra-L-histidine + (3) H2O --> (4) L-histidine	HIS4P	3.4.-	Amino acid metabolism	I	MMSYN1_0133 OR MMSYN1_0305 OR MMSYN1_0444 OR MMSYN1_0479
S112	[c]: Tetra-L-lysine + (3) H2O --> (4) L-lysine	LYS4P	3.4.-	Amino acid metabolism	I	MMSYN1_0133 OR MMSYN1_0305 OR MMSYN1_0444 OR MMSYN1_0479
S113	[c]: Tetra-L-proline + (3) H2O --> (4) L-proline	PRO4P	3.4.-	Amino acid metabolism	I	MMSYN1_0133 OR MMSYN1_0305 OR MMSYN1_0444 OR MMSYN1_0479
S114	[c]: Tetra-L-phenylalanine + (3) H2O --> (4) L-phenylalanine	PHE4P	3.4.-	Amino acid metabolism	I	MMSYN1_0133 OR MMSYN1_0305 OR MMSYN1_0444 OR MMSYN1_0479
S115	[c]: Tetra-L-threonine + (3) H2O --> (4) L-threonine	THR4P	3.4.-	Amino acid metabolism	I	MMSYN1_0133 OR MMSYN1_0305 OR MMSYN1_0444 OR MMSYN1_0479
S116	[c]: Tetra-L-tryptophan + (3) H2O --> (4) L-tryptophan	TRP4P	3.4.-	Amino acid metabolism	I	MMSYN1_0133 OR MMSYN1_0305 OR MMSYN1_0444 OR MMSYN1_0479
S117	[c]: Tetra-L-tyrosine + (3) H2O --> (4) L-tyrosine	TYR4P	3.4.-	Amino acid metabolism	I	MMSYN1_0133 OR MMSYN1_0305 OR MMSYN1_0444 OR MMSYN1_0479
S118	[c]: Tetra-L-valine + (3) H2O --> (4) L-valine	VAL4P	3.4.-	Amino acid metabolism	I	MMSYN1_0133 OR MMSYN1_0305 OR MMSYN1_0444 OR MMSYN1_0479
S119	[c]: Tetra-L-serine + (3) H2O --> (4) L-serine	SER4P	3.4.-	Amino acid metabolism	I	MMSYN1_0133 OR MMSYN1_0305 OR MMSYN1_0444 OR MMSYN1_0479
S120	[c]: Tetra-L-methionine + (3) H2O --> (4) L-methionine	MET4P	3.4.-	Amino acid metabolism	I	MMSYN1_0133 OR MMSYN1_0305 OR MMSYN1_0444 OR MMSYN1_0479
S121	[c]: H2O + ATP + L-methionine --> Phosphate + Diphosphate + S-adenosyl-L-methionine	MAT	2.5.1.6	Amino acid metabolism	I	MMSYN1_0432
S122	[c]: H2O + S-adenosyl-L-homocysteine --> L-homocysteine + adenosine	AHCi	3.3.1.1	Amino acid metabolism	I	MMSYN1_0381
S123	[c]: L-glutamine + H2O + L-glutamyl-tRNA(Gln) + ATP --> L-glutaminyl-tRNA(Gln) + ADP + L-glutamate + Phosphate + H+	GLNTRAT	6.3.5.7	Amino acid metabolism	I	MMSYN1_0687 AND MMSYN1_0688 AND MMSYN1_0689
S124	[c]: H2O + L-glutamyl-tRNA(Gln) + L-asparagine + ATP --> L-glutaminyl-tRNA(Gln) + ADP + Phosphate + H+ + L-aspartate	GLNTRAT2	6.3.5.7	Amino acid metabolism	I	MMSYN1_0687 AND MMSYN1_0688 AND MMSYN1_0689
S125	[c]: tRNA(Met) + L-methionine + ATP --> L-methionyl-tRNA(Met) + AMP + Diphosphate	METTRS	6.1.1.10	Amino acid metabolism	I	MMSYN1_0012
S126	[c]: tRNA(Ile) + L-isoleucine + ATP --> L-isoleucyl-tRNA(Ile) + AMP + Diphosphate	ILETRS	6.1.1.5	Amino acid metabolism	I	MMSYN1_0519
S127	[c]: tRNA(Val) + L-valine + ATP --> L-valyl-tRNA(Val) + AMP + Diphosphate	VALTRS	6.1.1.9	Amino acid metabolism	I	MMSYN1_0260
S128	[c]: tRNA(Leu) + L-leucine + ATP --> AMP + L-leucyl-tRNA(Leu) + Diphosphate	LEUTRS	6.1.1.4	Amino acid metabolism	I	MMSYN1_0634
S129	[c]: tRNA(Cys) + ATP + L-cysteine --> AMP + Diphosphate + L-cysteinyl-tRNA(Cys)	CYSTRS	6.1.1.16	Amino acid metabolism	I	MMSYN1_0837
S130	[c]: tRNA(Glu) + L-glutamate + ATP --> L-glutamyl-tRNA(Glu) + AMP + Diphosphate	GLUTRS	6.1.1.24	Amino acid metabolism	I	MMSYN1_0126
S131	[c]: L-glutamate + ATP + tRNA(Gln) --> L-glutamyl-tRNA(Gln) + AMP + Diphosphate	GLUTRS_Gln	6.1.1.24	Amino acid metabolism	I	MMSYN1_0126
S132	[c]: L-arginine + tRNA(Arg) + ATP --> AMP + L-arginyl-tRNA(Arg) + Diphosphate	ARGTRS	6.1.1.19	Amino acid metabolism	I	MMSYN1_0535
S133	[c]: L-tyrosine + tRNA(Tyr) + ATP --> AMP + L-tyrosyl-tRNA(Tyr) + Diphosphate	TYRTRS	6.1.1.1	Amino acid metabolism	I	MMSYN1_0613
S134	[c]: tRNA(Trp) + L-tryptophan + ATP --> AMP + L-tryptophanyl-tRNA(Trp) + Diphosphate	TRPTRS	6.1.1.2	Amino acid metabolism	I	MMSYN1_0308
S135	[c]: tRNA(Ser) + L-serine + ATP --> L-seryl-tRNA(Ser) + AMP + Diphosphate	SERTRS	6.1.1.11	Amino acid metabolism	I	MMSYN1_0061
S136	[c]: L-threonine + tRNA(Thr) + ATP --> AMP + L-threonyl-tRNA(Thr) + Diphosphate	THRTRS	6.1.1.3	Amino acid metabolism	I	MMSYN1_0222
S137	[c]: tRNA(Pro) + ATP + L-proline --> L-prolyl-tRNA(Pro) + AMP + Diphosphate	PROTRS	6.1.1.15	Amino acid metabolism	I	MMSYN1_0282
S138	[c]: tRNA(Asp) + L-aspartate + ATP --> AMP + L-aspartyl-tRNA(Asp) + Diphosphate	ASPTRS	6.1.1.12	Amino acid metabolism	I	MMSYN1_0287
S139	[c]: tRNA(Asn) + L-asparagine + ATP --> AMP + L-asparaginyl-tRNA(Asn) + Diphosphate	ASNTRS	6.1.1.22	Amino acid metabolism	I	MMSYN1_0076
S140	[c]: tRNA(Lys) + L-lysine + ATP --> AMP + Diphosphate + L-lysyl-tRNA(Lys)	LYSTRS	6.1.1.6	Amino acid metabolism	I	MMSYN1_0064
S141	[c]: L-histidine + ATP + tRNA(His) --> AMP + L-histidyl-tRNA(His) + Diphosphate	HISTRS	6.1.1.21	Amino acid metabolism	I	MMSYN1_0288
S142	[c]: tRNA(Phe) + L-phenylalanine + ATP --> AMP + L-phenylalanyl-tRNA(Phe) + Diphosphate	PHETRS	6.1.1.20	Amino acid metabolism	I	MMSYN1_0528 AND MMSYN1_0529
S143	[c]: L-alanine + tRNA(Ala) + ATP --> L-alanyl-tRNA(Ala) + AMP + Diphosphate	ALATRS	6.1.1.7	Amino acid metabolism	I	MMSYN1_0163
S144	[c]: glycine + tRNA(Gly) + ATP --> glycyl-tRNA(Gly) + AMP + Diphosphate	GLYTRS	6.1.1.14	Amino acid metabolism	I	MMSYN1_0405
S145	[c]: nicotinate + 5-phospho-alpha-D-ribose 1-diphosphate + H+ --> nicotinate D-ribonucleotide + Diphosphate	NCTPPRT	2.4.2.12	Cofactor metabolism	I	MMSYN1_0614
S146	[c]: nicotinate D-ribonucleotide + H+ + ATP --> deamino-NAD+ + Diphosphate	NNATr	2.7.7.18	Cofactor metabolism	I	MMSYN1_0380
S147	[c]: deamino-NAD+ + NH3 + ATP --> AMP + NAD+ + Diphosphate	NADS	6.3.1.5	Cofactor metabolism	I	MMSYN1_0378
S148	[c]: NAD+ + ATP --> ADP + NADP+ + H+	NADK	2.7.1.23	Cofactor metabolism	I	MMSYN1_0259
S149	[c]: NADH + ATP --> ADP + H+ + NADPH	NADHK	2.7.1.23	Cofactor metabolism	I	MMSYN1_0259
S150	[c]: riboflavin + ATP --> ADP + FMN + H+	RBFK	2.7.1.26	Cofactor metabolism	I	MMSYN1_0291
S151	[c]: FMN + H+ + ATP --> Diphosphate + FAD	FMNAT	2.7.7.2	Cofactor metabolism	I	MMSYN1_0291
S152	[c]: 5-formyltetrahydrofolate + (2) L-glutamate + (2) ATP --> 5-formyltetrahydrofolate tri-L-glutamate + (2) ADP + (2) Phosphate + (2) H+	5FTHFPGS	6.3.2.17	Cofactor metabolism	I	MMSYN1_0823
S153	[c]: H2O + 5,10-methenyltetrahydrofolate tri-L-glutamate <==> 10-formyltetrahydrofolate tri-L-glutamate + H+	MTHFC	3.5.4.9	Cofactor metabolism	R	MMSYN1_0684
S154	[c]: L-methionyl-tRNA(Met) + 10-formyltetrahydrofolate tri-L-glutamate --> tetrahydrofolate tri-L-glutamate + N-formylmethionyl-tRNA(Met) + H+	FMETTRS	2.1.2.9	Cofactor metabolism	I	MMSYN1_0390
S155	[c]: tetrahydrofolate tri-L-glutamate + L-serine <==> glycine + H2O + 5,10-methylenetetrahydrofolate tri-L-glutamate	GHMT	2.1.2.1	Cofactor metabolism	R	MMSYN1_0799
S156	[c]: NADP+ + 5,10-methylenetetrahydrofolate tri-L-glutamate <==> 5,10-methenyltetrahydrofolate tri-L-glutamate + NADPH	MTHFD	1.5.1.5	Cofactor metabolism	R	MMSYN1_0684
S157	[c]: ATP + 5-formyltetrahydrofolate tri-L-glutamate --> ADP + Phosphate + 5,10-methenyltetrahydrofolate tri-L-glutamate	FTHFCL	6.3.3.2	Cofactor metabolism	I	MMSYN1_0443
S158	[c]: H2O + 5,10-methenyltetrahydrofolate tri-L-glutamate --> 5-formyltetrahydrofolate tri-L-glutamate + H+	GHMT2	-	Cofactor metabolism	I	MMSYN1_0799
S159	[c]: (24) L-valyl-tRNA(Val) + (23) L-aspartyl-tRNA(Asp) + (12) L-arginyl-tRNA(Arg) + N-formylmethionyl-tRNA(Met) + (896) ATP + (39) L-lysyl-tRNA(Lys) + (15) L-glutaminyl-tRNA(Gln) + (36) L-isoleucyl-tRNA(Ile) + (899) H2O + (23) L-seryl-tRNA(Ser) + (11) L-prolyl-tRNA(Pro) + (21) glycyl-tRNA(Gly) + (23) L-alanyl-tRNA(Ala) + (13) L-tyrosyl-tRNA(Tyr) + (22) L-threonyl-tRNA(Thr) + (27) L-asparaginyl-t…	Protein_transl	3.5.1.88/3.4.11.18	Macromolecules	I	MMSYN1_0201 AND MMSYN1_0650
S160	[c]: L-tyrosyl-tRNA(Tyr) + (4) L-valyl-tRNA(Val) + (8) L-aspartyl-tRNA(Asp) + (3) L-arginyl-tRNA(Arg) + N-formylmethionyl-tRNA(Met) + (169) ATP + (7) L-lysyl-tRNA(Lys) + (3) L-glutaminyl-tRNA(Gln) + (7) L-isoleucyl-tRNA(Ile) + (172) H2O + (6) L-seryl-tRNA(Ser) + (3) glycyl-tRNA(Gly) + (2) L-alanyl-tRNA(Ala) + (3) L-threonyl-tRNA(Thr) + (3) L-asparaginyl-tRNA(Asn) + (2) L-methionyl-tRNA(Met) + (6)…	ACP_transl	3.5.1.88/3.4.11.18	Macromolecules	I	MMSYN1_0201 AND MMSYN1_0621 AND MMSYN1_0650
S161	[c]: (43) L-valyl-tRNA(Val) + (22) L-aspartyl-tRNA(Asp) + (11) L-arginyl-tRNA(Arg) + N-formylmethionyl-tRNA(Met) + (1023) ATP + (35) L-lysyl-tRNA(Lys) + (12) L-glutaminyl-tRNA(Gln) + (36) L-isoleucyl-tRNA(Ile) + (1025) H2O + (30) L-seryl-tRNA(Ser) + (27) L-prolyl-tRNA(Pro) + (27) glycyl-tRNA(Gly) + (50) L-alanyl-tRNA(Ala) + (6) L-tyrosyl-tRNA(Tyr) + (32) L-threonyl-tRNA(Thr) + (20) L-asparaginyl-…	PdhC_transl	3.5.1.88	Macromolecules	I	MMSYN1_0201 AND MMSYN1_0227
S162	[c]: (2) L-valyl-tRNA(Val) + (9) L-aspartyl-tRNA(Asp) + (2) L-arginyl-tRNA(Arg) + N-formylmethionyl-tRNA(Met) + (387) ATP + (15) L-lysyl-tRNA(Lys) + (9) L-glutaminyl-tRNA(Gln) + (22) L-isoleucyl-tRNA(Ile) + (389) H2O + (9) L-seryl-tRNA(Ser) + L-prolyl-tRNA(Pro) + (3) glycyl-tRNA(Gly) + (4) L-alanyl-tRNA(Ala) + (10) L-tyrosyl-tRNA(Tyr) + (5) L-threonyl-tRNA(Thr) + (28) L-asparaginyl-tRNA(Asn) + L-…	dUTPase_transl	3.5.1.88	Macromolecules	I	MMSYN1_0201 AND MMSYN1_0447
S163	[c]: (609) H2O + protein + (225) ATP --> (23) L-alanine + (13) L-tyrosine + (21) glycine + (3) L-tryptophan + (23) L-serine + (27) L-asparagine + (27) L-glutamate + (36) L-leucine + (225) H+ + (11) L-proline + (2) L-cysteine + (12) L-arginine + (39) L-lysine + (22) L-threonine + (16) L-phenylalanine + (225) Phosphate + (23) L-aspartate + (7) L-methionine + (225) ADP + (15) L-glutamine + (36) L-is…	Protein_degrad	3.4.21.53	Macromolecules	I	MMSYN1_0394
S164	[c]: (25) GTP + (28) UTP + (41) H2O + (20) CTP + (68) ATP --> (41) ADP + RNA + (41) Phosphate + (41) H+ + (100) Diphosphate	RNAP	2.7.7.6	Macromolecules	I
S165	[c]: (100) H2O + RNA --> (25) GMP + (27) AMP + (20) CMP + (28) UMP + (100) H+	RNA_degrad	-	Macromolecules	I
S166	[c]: (12) dGTP + (137) H2O + (38) dTTP + (12) dCTP + (137) ATP + (38) dATP --> (137) ADP + DNA + (137) Phosphate + (137) H+ + (100) Diphosphate	DNAP	2.7.7.7	Macromolecules	I
S167	[c]: (0.012567) protein + (0.001776) DNA + (0.000001) dUTPase + (0.001213) L-Histidine + (0.000210) 5,10-methenyltetrahydrofolate tri-L-glutamate + (0.005039) RNA + (0.022954) 1,2-diacylglycerol + (0.020970) cardiolipin + (0.840160) Potassium + (0.000068) DTTP + (0.006481) triacylglycerol + (0.002484) L-Arginine + (0.000105) NADP+ + (0.004288) lipogalactan + (0.000415) L-Tryptophan + (0.004658) C…	BIOMASS	-	Biomass production	I
S168	(4) H+[e] + ADP[c] + Phosphate[c] <==> H2O[c] + (3) H+[c] + ATP[c]	ATPase	3.6.3.14	Transport	R	MMSYN1_0789 AND MMSYN1_0790 AND MMSYN1_0791 AND MMSYN1_0792 AND MMSYN1_0793 AND MMSYN1_0794 AND MMSYN1_0795 AND MMSYN1_0796
S169	D-glucose[e] + phosphoenolpyruvate[c] --> D-glucose 6-phosphate[c] + pyruvate[c]	GLCpts	2.7.3.9/2.7.1.199	Transport	I	MMSYN1_0233 AND MMSYN1_0694 AND MMSYN1_0234 AND MMSYN1_0779
S170	D-glucosamine[e] + phosphoenolpyruvate[c] --> D-glucosamine 6-phosphate[c] + pyruvate[c]	GAMpts	2.7.3.9/2.7.1.191	Transport	I	MMSYN1_0233 AND MMSYN1_0694 AND MMSYN1_0234 AND MMSYN1_0779
S171	D-mannose[e] + phosphoenolpyruvate[c] --> D-mannose 6-phosphate[c] + pyruvate[c]	MANpts	2.7.3.9/2.7.1.191	Transport	I	MMSYN1_0233 AND MMSYN1_0694 AND MMSYN1_0234 AND MMSYN1_0779
S172	N-acetyl-D-mannosamine[e] + H2O[c] + ATP[c] --> N-acetyl-D-mannosamine[c] + ADP[c] + Phosphate[c] + H+[c]	AMANabc	3.6.3.17	Transport	I
S173	L-lactate[c] + H+[c] <==> L-lactate[e] + H+[e]	L_LACt2r	-	Transport	R
S174	pyruvate[c] + H+[c] <==> pyruvate[e] + H+[e]	PYRt2r	-	Transport	R
S175	H+[c] + acetate[c] <==> H+[e] + acetate[e]	ACt	-	Transport	R
S176	glycerol[e] <==> glycerol[c]	GLYCt	-	Transport	R
S177	fatty acid[e] <==> fatty acid[c]	FAt	-	Transport	R
S178	cholesterol[e] <==> cholesterol[c]	CHOLt	-	Transport	R
S179	triacylglycerol[e] <==> triacylglycerol[c]	TAGt	-	Transport	R
S180	acetaldehyde[c] <==> acetaldehyde[e]	ACALDt	-	Transport	R
S181	formate[e] <==> formate[c]	FORt	-	Transport	R
S182	riboflavin[e] + H2O[c] + ATP[c] --> riboflavin[c] + ADP[c] + Phosphate[c] + H+[c]	RIBFLVabc	-	Transport	I	MMSYN1_0641 AND MMSYN1_0642 AND MMSYN1_0643 AND MMSYN1_0877
S183	pyridoxal phosphate[e] + H2O[c] + ATP[c] --> pyridoxal phosphate[c] + ADP[c] + Phosphate[c] + H+[c]	P5Pabc	-	Transport	I	MMSYN1_0641 AND MMSYN1_0642 AND MMSYN1_0643 AND MMSYN1_0345
S184	5-formyltetrahydrofolate[e] + H2O[c] + ATP[c] --> 5-formyltetrahydrofolate[c] + ADP[c] + Phosphate[c] + H+[c]	5FTHFabc	-	Transport	I	MMSYN1_0641 AND MMSYN1_0642 AND MMSYN1_0643 AND MMSYN1_0822
S185	nicotinate[e] + H2O[c] + ATP[c] --> nicotinate[c] + ADP[c] + Phosphate[c] + H+[c]	NACabc	-	Transport	I	MMSYN1_0641 AND MMSYN1_0642 AND MMSYN1_0643 AND MMSYN1_0314
S186	CoA[e] + H2O[c] + ATP[c] --> CoA[c] + ADP[c] + Phosphate[c] + H+[c]	COAabc	-	Transport	I	MMSYN1_0641 AND MMSYN1_0642 AND MMSYN1_0643 AND MMSYN1_0836
S187	thiamin diphosphate[e] + H2O[c] + ATP[c] --> ADP[c] + Phosphate[c] + H+[c] + thiamin diphosphate[c]	THMPPabc	-	Transport	I	MMSYN1_0706 AND MMSYN1_0707 AND MMSYN1_0708
S188	spermine[e] + H2O[c] + ATP[c] --> ADP[c] + Phosphate[c] + H+[c] + spermine[c]	SPRMabc	3.6.3.31	Transport	I	MMSYN1_0195 AND MMSYN1_0196 AND MMSYN1_0197
S189	lipoyllysine[e] + PdhC[c] + H2O[c] + ATP[c] --> lipoyl-PdhC[c] + L-lysine[c] + ADP[c] + Phosphate[c] + H+[c]	LIPTA	-	Transport	I	MMSYN1_0401
S190	cytidine[e] + H2O[c] + ATP[c] --> cytidine[c] + ADP[c] + Phosphate[c] + H+[c]	CYTDabc	-	Transport	I	MMSYN1_0008 AND MMSYN1_0009 AND MMSYN1_0010 AND MMSYN1_0011
S191	deoxycytidine[e] + H2O[c] + ATP[c] --> deoxycytidine[c] + ADP[c] + Phosphate[c] + H+[c]	DCYTabc	-	Transport	I	MMSYN1_0008 AND MMSYN1_0009 AND MMSYN1_0010 AND MMSYN1_0011
S192	uridine[e] + H2O[c] + ATP[c] --> uridine[c] + ADP[c] + Phosphate[c] + H+[c]	URIabc	-	Transport	I	MMSYN1_0008 AND MMSYN1_0009 AND MMSYN1_0010 AND MMSYN1_0011
S193	deoxyuridine[e] + H2O[c] + ATP[c] --> deoxyuridine[c] + ADP[c] + Phosphate[c] + H+[c]	DURIabc	-	Transport	I	MMSYN1_0008 AND MMSYN1_0009 AND MMSYN1_0010 AND MMSYN1_0011
S194	thymidine[e] + H2O[c] + ATP[c] --> thymidine[c] + ADP[c] + Phosphate[c] + H+[c]	THMDabc	-	Transport	I	MMSYN1_0008 AND MMSYN1_0009 AND MMSYN1_0010 AND MMSYN1_0011
S195	adenosine[e] + H2O[c] + ATP[c] --> adenosine[c] + ADP[c] + Phosphate[c] + H+[c]	ADNabc	-	Transport	I	MMSYN1_0008 AND MMSYN1_0009 AND MMSYN1_0010 AND MMSYN1_0011
S196	deoxyadenosine[e] + H2O[c] + ATP[c] --> deoxyadenosine[c] + ADP[c] + Phosphate[c] + H+[c]	DADNabc	-	Transport	I	MMSYN1_0008 AND MMSYN1_0009 AND MMSYN1_0010 AND MMSYN1_0011
S197	guanosine[e] + H2O[c] + ATP[c] --> guanosine[c] + ADP[c] + Phosphate[c] + H+[c]	GSNabc	-	Transport	I	MMSYN1_0008 AND MMSYN1_0009 AND MMSYN1_0010 AND MMSYN1_0011
S198	deoxyguanosine[e] + H2O[c] + ATP[c] --> deoxyguanosine[c] + ADP[c] + Phosphate[c] + H+[c]	DGSNabc	-	Transport	I	MMSYN1_0008 AND MMSYN1_0009 AND MMSYN1_0010 AND MMSYN1_0011
S199	uracil[e] + H+[e] --> uracil[c] + H+[c]	URAt2	-	Transport	I
S200	guanine[e] + H+[e] --> guanine[c] + H+[c]	GUAt2	-	Transport	I
S201	adenine[e] + H+[e] --> adenine[c] + H+[c]	ADEt2	-	Transport	I
S202	Sodium[e] --> Sodium[c]	NAt	-	Transport	I
S203	Potassium[e] + Sodium[c] + H2O[c] + ATP[c] --> Potassium[c] + Sodium[e] + ADP[c] + Phosphate[c] + H+[c]	Kt6	3.6.3.9	Transport	I	MMSYN1_0685 AND MMSYN1_0686
S204	Sodium[c] + H+[e] --> Sodium[e] + H+[c]	NAt3	-	Transport	I
S205	Magnesium[e] + H2O[c] + ATP[c] --> Magnesium[c] + ADP[c] + Phosphate[c] + H+[c]	MG2abc	3.6.3.2	Transport	I	MMSYN1_0787
S206	Calcium[e] + H2O[c] + ATP[c] --> Calcium[c] + ADP[c] + Phosphate[c] + H+[c]	CA2abc	3.6.3.8	Transport	I	MMSYN1_0879
S207	Chloride[e] <==> Chloride[c]	CLt	-	Transport	R
S208	H+[e] --> H+[c]	Ht	-	Transport	I
S209	Phosphate[e] + H2O[c] + ATP[c] --> ADP[c] + (2) Phosphate[c] + H+[c]	PIabc	3.6.3.27	Transport	I	MMSYN1_0425 AND MMSYN1_0426 AND MMSYN1_0427
S210	Tetra-L-arginine[e] + ATP[c] + H2O[c] --> Tetra-L-arginine[c] + ADP[c] + Phosphate[c] + H+[c]	ARG4abc	3.6.3.23	Transport	I	MMSYN1_0165 AND MMSYN1_0166 AND MMSYN1_0167 AND MMSYN1_0168 AND MMSYN1_0169
S211	Tetra-L-aspartate[e] + ATP[c] + H2O[c] --> Tetra-L-aspartate[c] + ADP[c] + Phosphate[c] + H+[c]	ASP4abc	3.6.3.23	Transport	I	MMSYN1_0165 AND MMSYN1_0166 AND MMSYN1_0167 AND MMSYN1_0168 AND MMSYN1_0169
S212	Tetra-L-glutamate[e] + ATP[c] + H2O[c] --> Tetra-L-glutamate[c] + ADP[c] + Phosphate[c] + H+[c]	GLU4abc	3.6.3.23	Transport	I	MMSYN1_0165 AND MMSYN1_0166 AND MMSYN1_0167 AND MMSYN1_0168 AND MMSYN1_0169
S213	Tetra-glycine[e] + ATP[c] + H2O[c] --> Tetra-glycine[c] + ADP[c] + Phosphate[c] + H+[c]	GLY4abc	3.6.3.23	Transport	I	MMSYN1_0165 AND MMSYN1_0166 AND MMSYN1_0167 AND MMSYN1_0168 AND MMSYN1_0169
S214	Tetra-L-isoleucine[e] + ATP[c] + H2O[c] --> Tetra-L-isoleucine[c] + ADP[c] + Phosphate[c] + H+[c]	ISO4abc	3.6.3.23	Transport	I	MMSYN1_0165 AND MMSYN1_0166 AND MMSYN1_0167 AND MMSYN1_0168 AND MMSYN1_0169
S215	Tetra-L-alanine[e] + ATP[c] + H2O[c] --> Tetra-L-alanine[c] + ADP[c] + Phosphate[c] + H+[c]	ALA4abc	3.6.3.23	Transport	I	MMSYN1_0165 AND MMSYN1_0166 AND MMSYN1_0167 AND MMSYN1_0168 AND MMSYN1_0169
S216	Tetra-L-asparagine[e] + ATP[c] + H2O[c] --> Tetra-L-asparagine[c] + ADP[c] + Phosphate[c] + H+[c]	ASN4abc	3.6.3.23	Transport	I	MMSYN1_0165 AND MMSYN1_0166 AND MMSYN1_0167 AND MMSYN1_0168 AND MMSYN1_0169
S217	Tetra-L-leucine[e] + ATP[c] + H2O[c] --> Tetra-L-leucine[c] + ADP[c] + Phosphate[c] + H+[c]	LEU4abc	3.6.3.23	Transport	I	MMSYN1_0165 AND MMSYN1_0166 AND MMSYN1_0167 AND MMSYN1_0168 AND MMSYN1_0169
S218	Tetra-L-glutamine[e] + ATP[c] + H2O[c] --> Tetra-L-glutamine[c] + ADP[c] + Phosphate[c] + H+[c]	GLN4abc	3.6.3.23	Transport	I	MMSYN1_0165 AND MMSYN1_0166 AND MMSYN1_0167 AND MMSYN1_0168 AND MMSYN1_0169
S219	Tetra-L-histidine[e] + ATP[c] + H2O[c] --> Tetra-L-histidine[c] + ADP[c] + Phosphate[c] + H+[c]	HIS4abc	3.6.3.23	Transport	I	MMSYN1_0165 AND MMSYN1_0166 AND MMSYN1_0167 AND MMSYN1_0168 AND MMSYN1_0169
S220	Tetra-L-lysine[e] + ATP[c] + H2O[c] --> Tetra-L-lysine[c] + ADP[c] + Phosphate[c] + H+[c]	LYS4abc	3.6.3.23	Transport	I	MMSYN1_0165 AND MMSYN1_0166 AND MMSYN1_0167 AND MMSYN1_0168 AND MMSYN1_0169
S221	Tetra-L-proline[e] + ATP[c] + H2O[c] --> Tetra-L-proline[c] + ADP[c] + Phosphate[c] + H+[c]	PRO4abc	3.6.3.23	Transport	I	MMSYN1_0165 AND MMSYN1_0166 AND MMSYN1_0167 AND MMSYN1_0168 AND MMSYN1_0169
S222	Tetra-L-phenylalanine[e] + ATP[c] + H2O[c] --> Tetra-L-phenylalanine[c] + ADP[c] + Phosphate[c] + H+[c]	PHE4abc	3.6.3.23	Transport	I	MMSYN1_0165 AND MMSYN1_0166 AND MMSYN1_0167 AND MMSYN1_0168 AND MMSYN1_0169
S223	Tetra-L-threonine[e] + ATP[c] + H2O[c] --> Tetra-L-threonine[c] + ADP[c] + Phosphate[c] + H+[c]	THR4abc	3.6.3.23	Transport	I	MMSYN1_0165 AND MMSYN1_0166 AND MMSYN1_0167 AND MMSYN1_0168 AND MMSYN1_0169
S224	Tetra-L-tryptophan[e] + ATP[c] + H2O[c] --> Tetra-L-tryptophan[c] + ADP[c] + Phosphate[c] + H+[c]	TRP4abc	3.6.3.23	Transport	I	MMSYN1_0165 AND MMSYN1_0166 AND MMSYN1_0167 AND MMSYN1_0168 AND MMSYN1_0169
S225	Tetra-L-tyrosine[e] + ATP[c] + H2O[c] --> Tetra-L-tyrosine[c] + ADP[c] + Phosphate[c] + H+[c]	TYR4abc	3.6.3.23	Transport	I	MMSYN1_0165 AND MMSYN1_0166 AND MMSYN1_0167 AND MMSYN1_0168 AND MMSYN1_0169
S226	Tetra-L-valine[e] + ATP[c] + H2O[c] --> Tetra-L-valine[c] + ADP[c] + Phosphate[c] + H+[c]	VAL4abc	3.6.3.23	Transport	I	MMSYN1_0165 AND MMSYN1_0166 AND MMSYN1_0167 AND MMSYN1_0168 AND MMSYN1_0169
S227	Tetra-L-serine[e] + ATP[c] + H2O[c] --> Tetra-L-serine[c] + ADP[c] + Phosphate[c] + H+[c]	SER4abc	3.6.3.23	Transport	I	MMSYN1_0165 AND MMSYN1_0166 AND MMSYN1_0167 AND MMSYN1_0168 AND MMSYN1_0169
S228	Tetra-L-methionine[e] + ATP[c] + H2O[c] --> Tetra-L-methionine[c] + ADP[c] + Phosphate[c] + H+[c]	MET4abc	3.6.3.23	Transport	I	MMSYN1_0165 AND MMSYN1_0166 AND MMSYN1_0167 AND MMSYN1_0168 AND MMSYN1_0169
S229	L-arginine[e] + H+[e] --> L-arginine[c] + H+[c]	ARGt2r	-	Transport	I	MMSYN1_0876 OR MMSYN1_0878
S230	L-aspartate[e] + (2) H+[e] --> L-aspartate[c] + (2) H+[c]	ASPt2pr	-	Transport	I	MMSYN1_0886
S231	L-cysteine[e] + H+[e] --> L-cysteine[c] + H+[c]	CYSt2r	-	Transport	I	MMSYN1_0876 OR MMSYN1_0878
S232	L-glutamate[e] + (2) H+[e] --> L-glutamate[c] + (2) H+[c]	GLUt2pr	-	Transport	I	MMSYN1_0886
S233	glycine[e] + H+[e] --> glycine[c] + H+[c]	GLYt2r	-	Transport	I	MMSYN1_0876 OR MMSYN1_0878
S234	L-isoleucine[e] + H+[e] --> L-isoleucine[c] + H+[c]	ISOt2r	-	Transport	I	MMSYN1_0876 OR MMSYN1_0878
S235	L-alanine[e] + H+[e] --> L-alanine[c] + H+[c]	ALAt2r	-	Transport	I	MMSYN1_0876 OR MMSYN1_0878
S236	L-asparagine[e] + H+[e] --> L-asparagine[c] + H+[c]	ASNt2r	-	Transport	I	MMSYN1_0876 OR MMSYN1_0878
S237	L-leucine[e] + H+[e] --> L-leucine[c] + H+[c]	LEUt2r	-	Transport	I	MMSYN1_0876 OR MMSYN1_0878
S238	L-glutamine[e] + H+[e] --> L-glutamine[c] + H+[c]	GLNt2r	-	Transport	I	MMSYN1_0876 OR MMSYN1_0878
S239	L-histidine[e] + H+[e] --> L-histidine[c] + H+[c]	HISt2r	-	Transport	I	MMSYN1_0876 OR MMSYN1_0878
S240	L-lysine[e] + H+[e] --> L-lysine[c] + H+[c]	LYSt2r	-	Transport	I	MMSYN1_0876 OR MMSYN1_0878
S241	L-proline[e] + H+[e] --> L-proline[c] + H+[c]	PROt2r	-	Transport	I	MMSYN1_0876 OR MMSYN1_0878
S242	L-phenylalanine[e] + H+[e] --> L-phenylalanine[c] + H+[c]	PHEt2r	-	Transport	I	MMSYN1_0876 OR MMSYN1_0878
S243	L-threonine[e] + H+[e] --> L-threonine[c] + H+[c]	THRt2r	-	Transport	I	MMSYN1_0876 OR MMSYN1_0878
S244	L-tryptophan[e] + H+[e] --> L-tryptophan[c] + H+[c]	TRPt2r	-	Transport	I	MMSYN1_0876 OR MMSYN1_0878
S245	L-tyrosine[e] + H+[e] --> L-tyrosine[c] + H+[c]	TYRt2r	-	Transport	I	MMSYN1_0876 OR MMSYN1_0878
S246	L-valine[e] + H+[e] --> L-valine[c] + H+[c]	VALt2r	-	Transport	I	MMSYN1_0876 OR MMSYN1_0878
S247	L-serine[e] + H+[e] --> L-serine[c] + H+[c]	SERt2r	-	Transport	I	MMSYN1_0876 OR MMSYN1_0878
S248	L-methionine[e] + H+[e] --> L-methionine[c] + H+[c]	METt2r	-	Transport	I	MMSYN1_0876 OR MMSYN1_0878
S249	O2[e] <==> O2[c]	O2t	-	Transport	R
S250	CO2[e] <==> CO2[c]	CO2t	-	Transport	R
S251	H2O[e] <==> H2O[c]	H2Ot	-	Transport	R
S252	NH3[e] <==> NH3[c]	NH3t	-	Transport	R
S253	L-homocysteine[c] --> L-homocysteine[e]	HCYSt	-	Transport	I
S254	[c]: biomass -->	EX_biomass_c	-	Exchange	I
S255	[e]: L-lactate <==>	EX_lac__L_e	-	Exchange	R
S256	[e]: pyruvate <==>	EX_pyr_e	-	Exchange	R
S257	[e]: acetate <==>	EX_ac_e	-	Exchange	R
S258	[e]: adenine <==>	EX_ade_e	-	Exchange	R
S259	[e]: CO2 <==>	EX_co2_e	-	Exchange	R
S260	[e]: Tetra-L-arginine[e] <==>	EX_arg4_e	-	Exchange	R
S261	[e]: Tetra-L-aspartate[e] <==>	EX_asp4_e	-	Exchange	R
S262	[e]: Tetra-L-glutamate[e] <==>	EX_glu4_e	-	Exchange	R
S263	[e]: Tetra-glycine[e] <==>	EX_gly4_e	-	Exchange	R
S264	[e]: Tetra-L-isoleucine[e] <==>	EX_ile4_e	-	Exchange	R
S265	[e]: Tetra-L-alanine[e] <==>	EX_ala4_e	-	Exchange	R
S266	[e]: Tetra-L-asparagine[e] <==>	EX_asn4_e	-	Exchange	R
S267	[e]: Tetra-L-leucine[e] <==>	EX_leu4_e	-	Exchange	R
S268	[e]: Tetra-L-glutamine[e] <==>	EX_gln4_e	-	Exchange	R
S269	[e]: Tetra-L-histidine[e] <==>	EX_his4_e	-	Exchange	R
S270	[e]: Tetra-L-lysine[e] <==>	EX_lys4_e	-	Exchange	R
S271	[e]: Tetra-L-proline[e] <==>	EX_pro4_e	-	Exchange	R
S272	[e]: Tetra-L-phenylalanine[e] <==>	EX_phe4_e	-	Exchange	R
S273	[e]: Tetra-L-threonine[e] <==>	EX_thr4_e	-	Exchange	R
S274	[e]: Tetra-L-tryptophan[e] <==>	EX_trp4_e	-	Exchange	R
S275	[e]: Tetra-L-tyrosine[e] <==>	EX_tyr4_e	-	Exchange	R
S276	[e]: Tetra-L-valine[e] <==>	EX_val4_e	-	Exchange	R
S277	[e]: Tetra-L-serine[e] <==>	EX_ser4_e	-	Exchange	R
S278	[e]: Tetra-L-methionine[e] <==>	EX_met4_e	-	Exchange	R
S279	[e]: glycine <==>	EX_gly_e	-	Exchange	R
S280	[e]: L-alanine <==>	EX_ala__L_e	-	Exchange	R
S281	[e]: L-arginine <==>	EX_arg__L_e	-	Exchange	R
S282	[e]: L-asparagine <==>	EX_asn__L_e	-	Exchange	R
S283	[e]: L-aspartate <==>	EX_asp__L_e	-	Exchange	R
S284	[e]: L-cysteine <==>	EX_cys__L_e	-	Exchange	R
S285	[e]: L-glutamate <==>	EX_glu__L_e	-	Exchange	R
S286	[e]: L-glutamine <==>	EX_gln__L_e	-	Exchange	R
S287	[e]: L-histidine <==>	EX_his__L_e	-	Exchange	R
S288	[e]: L-homocysteine <==>	EX_hcys__L_e	-	Exchange	R
S289	[e]: L-isoleucine <==>	EX_ile__L_e	-	Exchange	R
S290	[e]: L-leucine <==>	EX_leu__L_e	-	Exchange	R
S291	[e]: L-lysine <==>	EX_lys__L_e	-	Exchange	R
S292	[e]: L-methionine <==>	EX_met__L_e	-	Exchange	R
S293	[e]: L-phenylalanine <==>	EX_phe__L_e	-	Exchange	R
S294	[e]: L-proline <==>	EX_pro__L_e	-	Exchange	R
S295	[e]: L-serine <==>	EX_ser__L_e	-	Exchange	R
S296	[e]: L-threonine <==>	EX_thr__L_e	-	Exchange	R
S297	[e]: L-tryptophan <==>	EX_trp__L_e	-	Exchange	R
S298	[e]: L-tyrosine <==>	EX_tyr__L_e	-	Exchange	R
S299	[e]: L-valine <==>	EX_val__L_e	-	Exchange	R
S300	[e]: NH3 <==>	EX_nh3_e	-	Exchange	R
S301	[e]: cytidine <==>	EX_cytd_e	-	Exchange	R
S302	[e]: deoxycytidine <==>	EX_dcyt_e	-	Exchange	R
S303	[e]: fatty acid <==>	EX_fa_e	-	Exchange	R
S304	[e]: 5-formyltetrahydrofolate <==>	EX_5fthf_e	-	Exchange	R
S305	[e]: D-glucose <==>	EX_glc__D_e	-	Exchange	R
S306	[e]: D-glucosamine <==>	EX_gam_e	-	Exchange	R
S307	[e]: D-mannose <==>	EX_man_e	-	Exchange	R
S308	[e]: N-acetyl-D-mannosamine <==>	EX_acmana_e	-	Exchange	R
S309	[e]: glycerol <==>	EX_glyc_e	-	Exchange	R
S310	[e]: guanine <==>	EX_gua_e	-	Exchange	R
S311	[e]: H+ <==>	EX_h_e	-	Exchange	R
S312	[e]: nicotinate <==>	EX_nac_e	-	Exchange	R
S313	[e]: Phosphate <==>	EX_pi_e	-	Exchange	R
S314	[e]: O2 <==>	EX_o2_e	-	Exchange	R
S315	[e]: riboflavin <==>	EX_ribflv_e	-	Exchange	R
S316	[e]: uracil <==>	EX_ura_e	-	Exchange	R
S317	[e]: H2O <==>	EX_h2o_e	-	Exchange	R
S318	[e]: uridine <==>	EX_uri_e	-	Exchange	R
S319	[e]: deoxyuridine <==>	EX_duri_e	-	Exchange	R
S320	[e]: thymidine <==>	EX_thymd_e	-	Exchange	R
S321	[e]: adenosine <==>	EX_adn_e	-	Exchange	R
S322	[e]: deoxyadenosine <==>	EX_dad_2_e	-	Exchange	R
S323	[e]: guanosine <==>	EX_gsn_e	-	Exchange	R
S324	[e]: deoxyguanosine <==>	EX_dgsn_e	-	Exchange	R
S325	[e]: CoA <==>	EX_coa_e	-	Exchange	R
S326	[e]: pyridoxal phosphate <==>	EX_pydx5p_e	-	Exchange	R
S327	[e]: thiamin diphosphate <==>	EX_thmpp_e	-	Exchange	R
S328	[e]: cholesterol <==>	EX_chsterol_e	-	Exchange	R
S329	[e]: triacylglycerol <==>	EX_tag_e	-	Exchange	R
S330	[e]: acetaldehyde <==>	EX_acald_e	-	Exchange	R
S331	[e]: Sodium <==>	EX_na1_e	-	Exchange	R
S332	[e]: Potassium <==>	EX_k_e	-	Exchange	R
S333	[e]: Magnesium <==>	EX_mg2_e	-	Exchange	R
S334	[e]: Calcium <==>	EX_ca2_e	-	Exchange	R
S335	[e]: Chloride <==>	EX_cl_e	-	Exchange	R
S336	[e]: spermine <==>	EX_sprm_e	-	Exchange	R
S337	[e]: formate <==>	EX_for_e	-	Exchange	R
S338	[e]: lipoyllysine <==>	EX_lplys__L_e	-	Exchange	R

## Sheet: Metabolites
Metabolite ID	Metabolite name	Formula	Charge	KEGG ID		InChI key
10fthfglu3_c	10-formyltetrahydrofolate tri-L-glutamate	C30H33N9O13	-4	C00234	(mono-Glu form)	UEASZQUTJQWRPJ-BVBHFADKSA-J
12dgr_c	1,2-diacylglycerol	C5H6O5R2	0	C00641			(no InChI key)
13dpg_c	3-Phospho-D-glyceroyl phosphate	C3H4O10P2	-4	C00236		LJQLQCAXBUHEAZ-UWTATZPHSA-N
1ag3p_c	1-acyl-glycerol 3-phosphate	C4H6O7PR	-2	C00681			(no InChI key)
2dr1p_c	2-Deoxy-D-ribose 1-phosphate	C5H9O7P	-2	C00672		KBDKAJNTYKVSEK-VPENINKCSA-N
2dr5p_c	2-Deoxy-D-ribose 5-phosphate	C5H9O7P	-2	C00673		KKZFLSZAWCYPOC-PYHARJCCSA-N
2pg_c	D-Glycerate 2-phosphate	C3H4O7P	-3	C00631		GXIURPTVHJPJLF-UWTATZPHSA-N
3pg_c	3-Phospho-D-glycerate	C3H4O7P	-3	C00197		OSJPPGNTCRNQQC-UWTATZPHSA-N
5fthf_c	5-Formyltetrahydrofolate	C20H21N7O7	-2	C03479		VVIAGPKUTFNRDU-UHFFFAOYSA-N
5fthf_e	5-formyltetrahydrofolate	C20H21N7O7	-2	C03479		VVIAGPKUTFNRDU-UHFFFAOYSA-N
5fthfglu3_c	5-formyltetrahydrofolate tri-L-glutamate	C30H33N9O13	-4	C03479	(mono-Glu form)	ZLOMJLIQXBKNHU-VJANTYMQSA-J
ac_c	Acetate	C2H3O2	-1	C00033		QTBSBXVTEAMEQO-UHFFFAOYSA-N
ac_e	Acetate	C2H3O2	-1	C00033		QTBSBXVTEAMEQO-UHFFFAOYSA-N
acald_c	Acetaldehyde	C2H4O	0	C00084		IKHGUXGNUITLKF-UHFFFAOYSA-N
acald_e	Acetaldehyde	C2H4O	0	C00084		IKHGUXGNUITLKF-UHFFFAOYSA-N
accoa_c	Acetyl-CoA	C23H34N7O17P3S	-4	C00024		ZSLZBFCDCINBPY-ZSJPKINUSA-N
acdhlpl_PdhC_c	S-acetyldihydrolipoyl-PdhC	C2097H3421N556O640S17	-3	C16255			(no InChI key)
acgam6p_c	N-Acetyl-D-glucosamine 6-phosphate	C8H14NO9P	-2	C00357		BRGMHAYQAZFZDJ-RTRLPJTCSA-N
acmana_c	N-Acetyl-D-mannosamine	C8H15NO6	0	C00645		OVRNDRQMDRJTHS-ZTVVOAFPSA-N
acmana_e	N-Acetyl-D-mannosamine	C8H15NO6	0	C00645		OVRNDRQMDRJTHS-ZTVVOAFPSA-N
acmanap_c	N-Acetyl-D-mannosamine 6-phosphate	C8H14NO9P	-2	C04257		BRGMHAYQAZFZDJ-ZTVVOAFPSA-N
ACP_c	Acyl carrier protein	C370H624N96O123PS3	-5	C00229			(no InChI key)
ACP_R_c	ACP-R	C371H623N96O124PRS3	-5	C00173			(no InChI key)
actp_c	Acetyl phosphate	C2H3O5P	-2	C00227		LIPOUNRJVLNBCD-UHFFFAOYSA-N
ade_c	Adenine	C5H5N5	0	C00147		GFFGJBXGBJISGV-UHFFFAOYSA-N
ade_e	Adenine	C5H5N5	0	C00147		GFFGJBXGBJISGV-UHFFFAOYSA-N
adn_c	Adenosine	C10H13N5O4	0	C00212		OIRDTQYFTABQOQ-KQYNXXCUSA-N
adn_e	Adenosine	C10H13N5O4	0	C00212		OIRDTQYFTABQOQ-KQYNXXCUSA-N
adp_c	ADP	C10H12N5O10P2	-3	C00008		XTWYTFMLZFPYCI-KQYNXXCUSA-N
ahcys_c	S-Adenosyl-L-homocysteine	C14H20N6O5S	0	C00021		ZJUKTBDSGOFHSH-WFMPWKQPSA-N
ala__L_c	L-Alanine	C3H7NO2	0	C00041		QNAYBMKLOCPYGJ-REOHCLBHSA-N
ala__L_e	L-Alanine	C3H7NO2	0	C00041		QNAYBMKLOCPYGJ-REOHCLBHSA-N
ala4_c	Tetra-L-alanine	C12H22N4O5	0	C01960	(generic tetra-peptide)	ZHRZLXZJVUFLNY-XAMCCFCMSA-N
ala4_e	Tetra-L-alanine	C12H22N4O5	0	C01960	(generic tetra-peptide)	ZHRZLXZJVUFLNY-XAMCCFCMSA-N
alatrna_c	L-Alanyl-tRNA(Ala)	C3H6NOR	1	C00886			(no InChI key)
amet_c	S-Adenosyl-L-methionine	C15H23N6O5S	1	C00019		MEFKEPWMEQBLKI-AIRLBKTGSA-N
amp_c	AMP	C10H12N5O7P	-2	C00020		UDMBCSSLTHHNCD-KQYNXXCUSA-N
ap_c	acyl phosphate	CO5PR	-2	C02133			(no InChI key)
apoACP_c	apoprotein (acyl carrier protein)	C359H604N94O117S2	-4	C03688			(no InChI key)
arg__L_c	L-Arginine	C6H15N4O2	1	C00062		ODKSFYDXXFIFQN-BYPYZUCNSA-N
arg__L_e	L-Arginine	C6H15N4O2	1	C00062		ODKSFYDXXFIFQN-BYPYZUCNSA-N
arg4_c	Tetra-L-arginine	C24H54N16O5	4	C01960	(generic tetra-peptide)		(no InChI key)
arg4_e	Tetra-L-arginine	C24H54N16O5	4	C01960	(generic tetra-peptide)		(no InChI key)
argtrna_c	L-Arginyl-tRNA(Arg)	C6H14N4OR	2	C02163			(no InChI key)
asn__L_c	L-Asparagine	C4H8N2O3	0	C00152		DCXYFEDJOCDNAF-REOHCLBHSA-N
asn__L_e	L-Asparagine	C4H8N2O3	0	C00152		DCXYFEDJOCDNAF-REOHCLBHSA-N
asn4_c	Tetra-L-asparagine	C16H26N8O9	0	C01960	(generic tetra-peptide)		(no InChI key)
asn4_e	Tetra-L-asparagine	C16H26N8O9	0	C01960	(generic tetra-peptide)		(no InChI key)
asntrna_c	L-Asparaginyl-tRNA(Asn)	C14H24N2O12PR2	1	C03402			(no InChI key)
asp__L_c	L-Aspartate	C4H6NO4	-1	C00049		CKLJMWTZIZZHCS-REOHCLBHSA-N
asp__L_e	L-Aspartate	C4H6NO4	-1	C00049		CKLJMWTZIZZHCS-REOHCLBHSA-N
asp4_c	Tetra-L-aspartate	C16H18N4O13	-4	C01960	(generic tetra-peptide)		(no InChI key)
asp4_e	Tetra-L-aspartate	C16H18N4O13	-4	C01960	(generic tetra-peptide)		(no InChI key)
asptrna_c	L-Aspartyl-tRNA(Asp)	C4H5NO3R	0	C02984			(no InChI key)
atp_c	ATP	C10H12N5O13P3	-4	C00002		ZKHQWZAMYRWXGA-KQYNXXCUSA-N
biomass_c	biomass	R	0		(not in KEGG)		(no InChI key)
ca2_c	Calcium	Ca	2	C00076		BHPQYMZQTOCNFJ-UHFFFAOYSA-N
ca2_e	Calcium	Ca	2	C00076		BHPQYMZQTOCNFJ-UHFFFAOYSA-N
cdp_c	CDP	C9H12N3O11P2	-3	C00112		ZWIADYZPOWUWEW-XVFCMESISA-N
cdpdag_c	CDP-diacylglycerol	C14H17N3O15P2R2	-2	C00269			(no InChI key)
chsterol_c	cholesterol	C27H46O	0	C00187		HVYWMOMLDIMFJA-DPAQBDIFSA-N
chsterol_e	cholesterol	C27H46O	0	C00187		HVYWMOMLDIMFJA-DPAQBDIFSA-N
cl_c	Chloride	Cl	-1	C00698		VEXZGXHMUGYJMC-UHFFFAOYSA-M
cl_e	Chloride	Cl	-1	C00698		VEXZGXHMUGYJMC-UHFFFAOYSA-M
clpn_c	cardiolipin	C13H16O17P2R4	-2	C05980			(no InChI key)
cmp_c	CMP	C9H12N3O8P	-2	C00055		IERHLVCPSMICTF-XVFCMESISA-N
co2_c	CO2	CO2	0	C00011		CURLTUGMZLYLDI-UHFFFAOYSA-N
co2_e	CO2	CO2	0	C00011		CURLTUGMZLYLDI-UHFFFAOYSA-N
coa_c	CoA	C21H32N7O16P3S	-4	C00010		RGJOEKWQDUBAIZ-IBOSZNHHSA-N
coa_e	CoA	C21H32N7O16P3S	-4	C00010		RGJOEKWQDUBAIZ-IBOSZNHHSA-N
ctp_c	CTP	C9H12N3O14P3	-4	C00063		PCDQPRRSZKQHHS-XVFCMESISA-N
cys__L_c	L-Cysteine	C3H7NO2S	0	C00097		XUJNEKJLAYXESH-REOHCLBHSA-N
cys__L_e	L-Cysteine	C3H7NO2S	0	C00097		XUJNEKJLAYXESH-REOHCLBHSA-N
cystrna_c	L-Cysteinyl-tRNA(Cys)	C3H6NOSR	1	C03125			(no InChI key)
cytd_c	Cytidine	C9H13N3O5	0	C00475		UHDGCWIWMRVCDJ-XVFCMESISA-N
cytd_e	Cytidine	C9H13N3O5	0	C00475		UHDGCWIWMRVCDJ-XVFCMESISA-N
dad_2_c	Deoxyadenosine	C10H13N5O3	0	C00559		OLXZPDWKRNYJJZ-RRKCRQDMSA-N
dad_2_e	Deoxyadenosine	C10H13N5O3	0	C00559		OLXZPDWKRNYJJZ-RRKCRQDMSA-N
dadp_c	DADP	C10H12N5O9P2	-3	C00206		DAEAPNUQQAICNR-RRKCRQDMSA-N
damp_c	DAMP	C10H12N5O6P	-2	C00360		KHWCHTKSEGGWEX-RRKCRQDMSA-N
datp_c	DATP	C10H12N5O12P3	-4	C00131		SUYVUBYJARFZHO-RRKCRQDMSA-N
dcdp_c	DCDP	C9H12N3O10P2	-3	C00705		FTDHDKPUHBLBTL-SHYZEUOFSA-N
dcmp_c	DCMP	C9H12N3O7P	-2	C00239		NCMVOABPESMRCP-SHYZEUOFSA-N
dctp_c	DCTP	C9H12N3O13P3	-4	C00458		RGWHQCVHVJXOKC-SHYZEUOFSA-N
dcyt_c	Deoxycytidine	C9H13N3O4	0	C00881		CKTSBUTUHBMZGZ-SHYZEUOFSA-N
dcyt_e	Deoxycytidine	C9H13N3O4	0	C00881		CKTSBUTUHBMZGZ-SHYZEUOFSA-N
dgdp_c	DGDP	C10H12N5O10P2	-3	C00361		CIKGWCTVFSRMJU-KVQBGUIXSA-N
dgmp_c	DGMP	C10H12N5O7P	-2	C00362		LTFMZDNNPPEQNG-KVQBGUIXSA-N
dgsn_c	Deoxyguanosine	C10H13N5O4	0	C00330		YKBGVTZYEHREMT-KVQBGUIXSA-N
dgsn_e	Deoxyguanosine	C10H13N5O4	0	C00330		YKBGVTZYEHREMT-KVQBGUIXSA-N
dgtp_c	DGTP	C10H12N5O13P3	-4	C00286		HAAZLUGHYHWQIW-KVQBGUIXSA-N
dhap_c	Dihydroxyacetone phosphate	C3H5O6P	-2	C00111		GNGACRATGGDKBX-UHFFFAOYSA-N
dhlpl_PdhC_c	dihydrolipoyl-PdhC	C2095H3419N556O639S17	-3	C15973			(no InChI key)
DNA_c	DNA	C988H1138N362O600P100	-100	C00039			(no InChI key)
dnad_c	Deamino-NAD+	C21H24N6O15P2	-2	C00857		SENPVEZBRZQVST-HISDBWNOSA-O
dtdp_c	DTDP	C10H13N2O11P2	-3	C00363		UJLXYODCHAELLY-XLPZGREQSA-N
dtmp_c	DTMP	C10H13N2O8P	-2	C00364		GYOZYWVXFNDGLU-XLPZGREQSA-N
dttp_c	DTTP	C10H13N2O14P3	-4	C00459		NHVNXKFIZYSCEB-XLPZGREQSA-N
dudp_c	DUDP	C9H11N2O11P2	-3	C01346		QHWZTVCCBMIIKE-SHYZEUOFSA-N
dump_c	DUMP	C9H11N2O8P	-2	C00365		JSRLJPSBLDHEIO-SHYZEUOFSA-N
duri_c	Deoxyuridine	C9H12N2O5	0	C00526		MXHRCPNRJAMMIM-SHYZEUOFSA-N
duri_e	Deoxyuridine	C9H12N2O5	0	C00526		MXHRCPNRJAMMIM-SHYZEUOFSA-N
dutp_c	DUTP	C9H11N2O14P3	-4	C00460		AHCYMLUZIRLXAA-SHYZEUOFSA-N
dUTPase_c	dUTPase	C916H1383N230O273S3	-5		(not in KEGG)		(no InChI key)
e4p_c	D-Erythrose 4-phosphate	C4H7O7P	-2	C00279		NGHMDNPXVRFFGS-IUYQGCFVSA-N
f6p_c	D-Fructose 6-phosphate	C6H11O9P	-2	C00085		BGWGXPAPYGQALX-VRPWFDPXSA-N
fa_c	fatty acid	CO2R	-1	C00162			(no InChI key)
fa_e	fatty acid	CO2R	-1	C00162			(no InChI key)
fad_c	FAD	C27H31N9O15P2	-2	C00016		VWWQXMAJTJZDQX-UYBVJOGSSA-N
fdp_c	D-Fructose 1,6-bisphosphate	C6H10O12P2	-4	C00354		RNBGYGVWRKECFJ-VRPWFDPXSA-N
fmettrna_c	N-formylmethionyl-tRNA(Met)	C6H9NO2RS	0	C03294			(no InChI key)
fmn_c	FMN	C17H19N4O9P	-2	C00061		FVTCRASFADXXNN-SCRDCRAPSA-N
for_c	Formate	CH1O2	-1	C00058		BDAGIHXWWSANSR-UHFFFAOYSA-N
for_e	Formate	CH1O2	-1	C00058		BDAGIHXWWSANSR-UHFFFAOYSA-N
g1p_c	D-Glucose 1-phosphate	C6H11O9P	-2	C00103		HXXFSFRBOHSIMQ-VFUOTHLCSA-N
g3p_c	Glyceraldehyde 3-phosphate	C3H5O6P	-2	C00118		LXJXRIRHZLFYRP-VKHMYHEASA-N
g6p_c	D-Glucose 6-phosphate	C6H11O9P	-2	C00092		NBSCHQHZLSJFNQ-GASJEMHNSA-N
galfur12dgr_c	Gal-DAG	C11H16O10R2	0	C03692			(no InChI key)
gam_e	D-Glucosamine	C6H14NO5	1	C00329		MSWZFWKMSRAUBD-IVMDWMLBSA-N
gam6p_c	D-Glucosamine 6-phosphate	C6H13NO8P	-1	C00352		XHMJOUIAFHJHBW-IVMDWMLBSA-N
gdp_c	GDP	C10H12N5O11P2	-3	C00035		QGWNDRXFNXRZMB-UUOKFMHZSA-N
glc__D_e	D-Glucose	C6H12O6	0	C00031		WQZGKKKJIJFFOK-GASJEMHNSA-N
gln__L_c	L-Glutamine	C5H10N2O3	0	C00064		ZDXPYRJPNDTMRX-VKHMYHEASA-N
gln__L_e	L-Glutamine	C5H10N2O3	0	C00064		ZDXPYRJPNDTMRX-VKHMYHEASA-N
gln4_c	Tetra-L-glutamine	C20H34N8O9	0	C01960	(generic tetra-peptide)		(no InChI key)
gln4_e	Tetra-L-glutamine	C20H34N8O9	0	C01960	(generic tetra-peptide)		(no InChI key)
glntrna_c	L-Glutaminyl-tRNA(Gln)	C5H9N2O2R	1	C02282			(no InChI key)
glu__L_c	L-Glutamate	C5H8NO4	-1	C00025		WHUUTDBJXJRKMK-VKHMYHEASA-N
glu__L_e	L-Glutamate	C5H8NO4	-1	C00025		WHUUTDBJXJRKMK-VKHMYHEASA-N
glu4_c	Tetra-L-glutamate	C20H26N4O13	-4	C01960	(generic tetra-peptide)		(no InChI key)
glu4_e	Tetra-L-glutamate	C20H26N4O13	-4	C01960	(generic tetra-peptide)		(no InChI key)
glutrna_c	L-Glutamyl-tRNA(Glu)	C5H7NO3R	0	C02987			(no InChI key)
glutrnagln_c	L-glutamyl-tRNA(Gln)	C5H7NO3R	0	C06112			(no InChI key)
gly_c	Glycine	C2H5NO2	0	C00037		DHMQDGOQFOQNFH-UHFFFAOYSA-N
gly_e	Glycine	C2H5NO2	0	C00037		DHMQDGOQFOQNFH-UHFFFAOYSA-N
gly4_c	Tetra-glycine	C8H14N4O5	0	C01960	(generic tetra-peptide)	QMOQBVOBWVNSNO-UHFFFAOYSA-N
gly4_e	Tetra-glycine	C8H14N4O5	0	C01960	(generic tetra-peptide)	QMOQBVOBWVNSNO-UHFFFAOYSA-N
glyc_c	Glycerol	C3H8O3	0	C00116		PEDCQBHIVMGVHV-UHFFFAOYSA-N
glyc_e	Glycerol	C3H8O3	0	C00116		PEDCQBHIVMGVHV-UHFFFAOYSA-N
glyc3p_c	Glycerol 3-phosphate	C3H7O6P	-2	C00093		AWUCVROLDVIAJX-GSVOUGTGSA-N
glytrna_c	Glycyl-tRNA(Gly)	C2H4NOR	1	C02412			(no InChI key)
gmp_c	GMP	C10H12N5O8P	-2	C00144		RQFCJASXJCIDSX-UUOKFMHZSA-N
gsn_c	Guanosine	C10H13N5O5	0	C00387		NYHBQMYGNKIUIF-UUOKFMHZSA-N
gsn_e	Guanosine	C10H13N5O5	0	C00387		NYHBQMYGNKIUIF-UUOKFMHZSA-N
gtp_c	GTP	C10H12N5O14P3	-4	C00044		XKMLYUALXHKNFT-UUOKFMHZSA-N
gua_c	Guanine	C5H5N5O	0	C00242		UYTPUPDQBNUYGX-UHFFFAOYSA-N
gua_e	Guanine	C5H5N5O	0	C00242		UYTPUPDQBNUYGX-UHFFFAOYSA-N
h_c	H+	H	1	C00080		GPRLSGONYQIRFK-UHFFFAOYSA-N
h_e	H+	H	1	C00080		GPRLSGONYQIRFK-UHFFFAOYSA-N
h2o_c	H2O	H2O	0	C00001		XLYOFNOQVPJJNP-UHFFFAOYSA-N
h2o_e	H2O	H2O	0	C00001		XLYOFNOQVPJJNP-UHFFFAOYSA-N
hcys__L_c	L-Homocysteine	C4H9NO2S	0	C00155		FFFHZYDWPBMWHY-VKHMYHEASA-N
hcys__L_e	L-homocysteine	C4H9NO2S	0	C00155		FFFHZYDWPBMWHY-VKHMYHEASA-N
his__L_c	L-Histidine	C6H9N3O2	0	C00135		HNDVDQJCIGZPNO-YFKPBYRVSA-N
his__L_e	L-Histidine	C6H9N3O2	0	C00135		HNDVDQJCIGZPNO-YFKPBYRVSA-N
his4_c	Tetra-L-histidine	C24H30N12O5	0	C01960	(generic tetra-peptide)		(no InChI key)
his4_e	Tetra-L-histidine	C24H30N12O5	0	C01960	(generic tetra-peptide)		(no InChI key)
histrna_c	L-Histidyl-tRNA(His)	C6H8N3OR	1	C02988			(no InChI key)
ile__L_c	L-Isoleucine	C6H13NO2	0	C00407		AGPKZVBTJJNPAG-WHFBIAKZSA-N
ile__L_e	L-Isoleucine	C6H13NO2	0	C00407		AGPKZVBTJJNPAG-WHFBIAKZSA-N
ile4_c	Tetra-L-isoleucine	C24H46N4O5	0	C01960	(generic tetra-peptide)		(no InChI key)
ile4_e	Tetra-L-isoleucine	C24H46N4O5	0	C01960	(generic tetra-peptide)		(no InChI key)
iletrna_c	L-Isoleucyl-tRNA(Ile)	C6H12NOR	1	C03127			(no InChI key)
k_c	Potassium	K	1	C00238		NPYPAHLBTDXSSS-UHFFFAOYSA-N
k_e	Potassium	K	1	C00238		NPYPAHLBTDXSSS-UHFFFAOYSA-N
lac__L_c	L-Lactate	C3H5O3	-1	C00186		JVTAAEKCZFNVCJ-REOHCLBHSA-N
lac__L_e	L-Lactate	C3H5O3	-1	C00186		JVTAAEKCZFNVCJ-REOHCLBHSA-N
leu__L_c	L-Leucine	C6H13NO2	0	C00123		ROHFNLRQFUQHCH-YFKPBYRVSA-N
leu__L_e	L-Leucine	C6H13NO2	0	C00123		ROHFNLRQFUQHCH-YFKPBYRVSA-N
leu4_c	Tetra-L-leucine	C24H46N4O5	0	C01960	(generic tetra-peptide)		(no InChI key)
leu4_e	Tetra-L-leucine	C24H46N4O5	0	C01960	(generic tetra-peptide)		(no InChI key)
leutrna_c	L-Leucyl-tRNA(Leu)	C6H12NOR	1	C02047			(no InChI key)
lgltn_c	lipogalactan	C533H886N0O445P0R2	0		(not in KEGG)		(no InChI key)
lpl_PdhC_c	lipoyl-PdhC	C2095H3417N556O639S17	-3	C15972			(no InChI key)
lplys__L_e	lipoyllysine	C14H26N2O3S2	0		(not in KEGG)	COTIXRRJLCSLLS-PIJUOVFKSA-N
lys__L_c	L-Lysine	C6H15N2O2	1	C00047		KDXKERNSBIXSRK-YFKPBYRVSA-N
lys__L_e	L-Lysine	C6H15N2O2	1	C00047		KDXKERNSBIXSRK-YFKPBYRVSA-N
lys4_c	Tetra-L-lysine	C24H54N8O5	4	C01960	(generic tetra-peptide)		(no InChI key)
lys4_e	Tetra-L-lysine	C24H54N8O5	4	C01960	(generic tetra-peptide)		(no InChI key)
lystrna_c	L-lysyl-tRNA(Lys)	C6H14N2OR	2	C01931			(no InChI key)
man_e	D-Mannose	C6H12O6	0	C00159		WQZGKKKJIJFFOK-QTVWNMPRSA-N
man6p_c	D-Mannose 6-phosphate	C6H11O9P	-2	C00275		NBSCHQHZLSJFNQ-QTVWNMPRSA-N
met__L_c	L-Methionine	C5H11NO2S	0	C00073		FFEARJCKVFRZRR-BYPYZUCNSA-N
met__L_e	L-Methionine	C5H11NO2S	0	C00073		FFEARJCKVFRZRR-BYPYZUCNSA-N
met4_c	Tetra-L-methionine	C20H38N4O5S4	0	C01960	(generic tetra-peptide)		(no InChI key)
met4_e	Tetra-L-methionine	C20H38N4O5S4	0	C01960	(generic tetra-peptide)		(no InChI key)
methfglu3_c	5,10-methenyltetrahydrofolate tri-L-glutamate	C30H32N9O12	-3	C00445	(mono-Glu form)	DARSOJGVXCLIQG-XWSJACJDSA-K
mettrna_c	L-methionyl-tRNA(Met)	C5H10NORS	1	C02430			(no InChI key)
mg2_c	Magnesium	Mg	2	C00305		JLVVSXFLKOJNIY-UHFFFAOYSA-N
mg2_e	Magnesium	Mg	2	C00305		JLVVSXFLKOJNIY-UHFFFAOYSA-N
mlthfglu3_c	5,10-methylenetetrahydrofolate tri-L-glutamate	C30H33N9O12	-4	C00143	(mono-Glu form)	QYNUQALWYRSVHF-PZORYLMUSA-N	(mono-Glu form)
na1_c	Sodium	Na	1	C01330		FKNQFGJONOIPTF-UHFFFAOYSA-N
na1_e	Sodium	Na	1	C01330		FKNQFGJONOIPTF-UHFFFAOYSA-N
nac_c	Nicotinate	C6H4NO2	-1	C00253		PVNIIMVLHYAWGP-UHFFFAOYSA-N
nac_e	Nicotinate	C6H4NO2	-1	C00253		PVNIIMVLHYAWGP-UHFFFAOYSA-N
nad_c	NAD+	C21H26N7O14P2	-1	C00003		BAWFJGJZGIEFAR-NNYOXOHSSA-O
nadh_c	NADH	C21H27N7O14P2	-2	C00004		BOPGDPNILDQYTO-NNYOXOHSSA-N
nadp_c	NADP+	C21H25N7O17P3	-3	C00006		XJLXINKUBYWONI-NNYOXOHSSA-O
nadph_c	NADPH	C21H26N7O17P3	-4	C00005		ACFIXJIJDZMPPO-NNYOXOHSSA-N
nh3_c	NH3	NH3	0	C00014		QGZKDVFQNNGYKY-UHFFFAOYSA-N
nh3_e	NH3	NH3	0	C00014		QGZKDVFQNNGYKY-UHFFFAOYSA-N
nicrnt_c	Nicotinate D-ribonucleotide	C11H12NO9P	-2	C01185		JOUIQRNQJGXQDC-ZYUZMQFOSA-O
o2_c	O2	O2	0	C00007		MYMOFIZGZYHOMD-UHFFFAOYSA-N
o2_e	O2	O2	0	C00007		MYMOFIZGZYHOMD-UHFFFAOYSA-N
pa_c	phosphatidic acid	C5H5O8PR2	-2	C00416			(no InChI key)
pap_c	Adenosine 3',5'-bisphosphate	C10H11N5O10P2	-4	C00054		WHTCPDAXWFLDIH-KQYNXXCUSA-N
PdhC_c	PdhC	C2087H3406N556O638S15	-2		(not in KEGG)		(no InChI key)
pep_c	Phosphoenolpyruvate	C3H2O6P	-3	C00074		DTBNBXWJWCWCIK-UHFFFAOYSA-N
pg_c	phosphatidylglycerol	C8H12O10PR2	-1	C00344			(no InChI key)
pg3p_c	phosphatidylglycerol 3-phosphate	C8H11O13P2R2	-3	C03892			(no InChI key)
phe__L_c	L-Phenylalanine	C9H11NO2	0	C00079		COLNVLDHVKWLRT-QMMMGPOBSA-N
phe__L_e	L-Phenylalanine	C9H11NO2	0	C00079		COLNVLDHVKWLRT-QMMMGPOBSA-N
phe4_c	Tetra-L-phenylalanine	C36H38N4O5	0	C01960	(generic tetra-peptide)		(no InChI key)
phe4_e	Tetra-L-phenylalanine	C36H38N4O5	0	C01960	(generic tetra-peptide)		(no InChI key)
phetrna_c	L-Phenylalanyl-tRNA(Phe)	C9H10NOR	1	C03511			(no InChI key)
pi_c	Phosphate	HO4P	-2	C00009		NBIIXXVUZAFLBC-UHFFFAOYSA-N
pi_e	Phosphate	HO4P	-2	C00009		NBIIXXVUZAFLBC-UHFFFAOYSA-N
ppi_c	Diphosphate	HO7P2	-3	C00013		XPPKVPWEQAFLFU-UHFFFAOYSA-N
pro__L_c	L-Proline	C5H9NO2	0	C00148		ONIBWKKTOPOVIA-BYPYZUCNSA-N
pro__L_e	L-Proline	C5H9NO2	0	C00148		ONIBWKKTOPOVIA-BYPYZUCNSA-N
pro4_c	Tetra-L-proline	C20H30N4O5	0	C01960	(generic tetra-peptide)		(no InChI key)
pro4_e	Tetra-L-proline	C20H30N4O5	0	C01960	(generic tetra-peptide)		(no InChI key)
protein_c	protein	C1956H3132N515O586S9	1	C00017			(no InChI key)
protrna_c	L-Prolyl-tRNA(Pro)	C5H8NOR	1	C02702			(no InChI key)
prpp_c	5-Phospho-alpha-D-ribose 1-diphosphate	C5H8O14P3	-5	C00119		PQGCEDQWHSBAJP-TXICZTDVSA-N
pydx5p_c	pyridoxal phosphate	C8H8NO6P	-2	C00018		NGVDGCNFYWLIFO-UHFFFAOYSA-N
pydx5p_e	pyridoxal phosphate	C8H8NO6P	-2	C00018		NGVDGCNFYWLIFO-UHFFFAOYSA-N
pyr_c	Pyruvate	C3H3O3	-1	C00022		LCTONWCANYUPML-UHFFFAOYSA-N
pyr_e	Pyruvate	C3H3O3	-1	C00022		LCTONWCANYUPML-UHFFFAOYSA-N
r1p_c	D-ribose 1-phosphate	C5H9O8P	-2	C00620		YXJDFQJKERBOBM-TXICZTDVSA-N
r5p_c	D-ribose 5-phosphate	C5H9O8P	-2	C00117		KTVPXOYAKDPRHY-SOOFDHNKSA-N
ribflv_c	Riboflavin	C17H20N4O6	0	C00255		AUNGANRZJHBGPY-SCRDCRAPSA-N
ribflv_e	riboflavin	C17H20N4O6	0	C00255		AUNGANRZJHBGPY-SCRDCRAPSA-N
RNA_c	RNA	C952H1072N376O701P100	-100	C00046			(no InChI key)
ru5p__D_c	D-Ribulose 5-phosphate	C5H9O8P	-2	C00199		FNZLKVNUWIIPSJ-UHNVWZDZSA-N
s7p_c	Sedoheptulose 7-phosphate	C7H13O10P	-2	C05382		JDTUMPKOJBQPKX-GBNDHIKLSA-N
ser__L_c	L-Serine	C3H7NO3	0	C00065		MTCFGRXMJLQNBG-REOHCLBHSA-N
ser__L_e	L-Serine	C3H7NO3	0	C00065		MTCFGRXMJLQNBG-REOHCLBHSA-N
ser4_c	Tetra-L-serine	C12H22N4O9	0	C01960	(generic tetra-peptide)		(no InChI key)
ser4_e	Tetra-L-serine	C12H22N4O9	0	C01960	(generic tetra-peptide)		(no InChI key)
sertrna_c	L-Seryl-tRNA(Ser)	C3H6NO2R	1	C02553			(no InChI key)
sprm_c	spermine	C10H30N4	4	C00750		PFNFFQXMRSDOHW-UHFFFAOYSA-N
sprm_e	spermine	C10H30N4	4	C00750		PFNFFQXMRSDOHW-UHFFFAOYSA-N
tag_c	triacylglycerol	C6H5O6R3	0	C00422			(no InChI key)
tag_e	triacylglycerol	C6H5O6R3	0	C00422			(no InChI key)
thfglu3_c	tetrahydrofolate tri-L-glutamate	C29H33N9O12	-4	C00101	(mono-Glu form)	MSTNYGQPCMXVAQ-KIYNQFGBSA-N	(mono-Glu form)
thmpp_c	thiamin diphosphate	C12H19N4O7P2S	0	C00068		AYEKOFBPNLCAJY-UHFFFAOYSA-O
thmpp_e	thiamin diphosphate	C12H19N4O7P2S	0	C00068		AYEKOFBPNLCAJY-UHFFFAOYSA-O
thr__L_c	L-Threonine	C4H9NO3	0	C00188		AYFVYJQAPQTCCC-GBXIJSLDSA-N
thr__L_e	L-Threonine	C4H9NO3	0	C00188		AYFVYJQAPQTCCC-GBXIJSLDSA-N
thr4_c	Tetra-L-threonine	C16H30N4O9	0	C01960	(generic tetra-peptide)		(no InChI key)
thr4_e	Tetra-L-threonine	C16H30N4O9	0	C01960	(generic tetra-peptide)		(no InChI key)
thrtrna_c	L-Threonyl-tRNA(Thr)	C4H8NO2R	1	C02992			(no InChI key)
thymd_c	Thymidine	C10H14N2O5	0	C00214		IQFYYKKMVGJFEH-XLPZGREQSA-N
thymd_e	Thymidine	C10H14N2O5	0	C00214		IQFYYKKMVGJFEH-XLPZGREQSA-N
trdox_c	Oxidized thioredoxin	R	0	C00343			(no InChI key)
trdrd_c	Reduced thioredoxin	H2R	0	C00342			(no InChI key)
trnaala_c	TRNA(Ala)	R	0	C01635			(no InChI key)
trnaarg_c	TRNA(Arg)	R	0	C01636			(no InChI key)
trnaasn_c	TRNA(Asn)	C10H17O10PR2	0	C01637			(no InChI key)
trnaasp_c	TRNA(Asp)	R	0	C01638			(no InChI key)
trnacys_c	TRNA(Cys)	R	0	C01639			(no InChI key)
trnagln_c	TRNA(Gln)	R	0	C01640			(no InChI key)
trnaglu_c	tRNA(Glu)	R	0	C01641			(no InChI key)
trnagly_c	TRNA(Gly)	R	0	C01642			(no InChI key)
trnahis_c	TRNA(His)	R	0	C01643			(no InChI key)
trnaile_c	TRNA(Ile)	R	0	C01644			(no InChI key)
trnaleu_c	TRNA(Leu)	R	0	C01645			(no InChI key)
trnalys_c	TRNA(Lys)	R	0	C01646			(no InChI key)
trnamet_c	TRNA(Met)	R	0	C01647			(no InChI key)
trnaphe_c	TRNA(Phe)	R	0	C01648			(no InChI key)
trnapro_c	TRNA(Pro)	R	0	C01649			(no InChI key)
trnaser_c	TRNA(Ser)	R	0	C01650			(no InChI key)
trnathr_c	TRNA(Thr)	R	0	C01651			(no InChI key)
trnatrp_c	TRNA(Trp)	R	0	C01652			(no InChI key)
trnatyr_c	TRNA(Tyr)	R	0	C00787			(no InChI key)
trnaval_c	TRNA(Val)	R	0	C01653			(no InChI key)
trp__L_c	L-Tryptophan	C11H12N2O2	0	C00078		QIVBCDIJIAJPQS-VIFPVBQESA-N
trp__L_e	L-Tryptophan	C11H12N2O2	0	C00078		QIVBCDIJIAJPQS-VIFPVBQESA-N
trp4_c	Tetra-L-tryptophan	C44H42N8O5	0	C01960	(generic tetra-peptide)		(no InChI key)
trp4_e	Tetra-L-tryptophan	C44H42N8O5	0	C01960	(generic tetra-peptide)		(no InChI key)
trptrna_c	L-Tryptophanyl-tRNA(Trp)	C11H11N2OR	1	C03512			(no InChI key)
tyr__L_c	L-Tyrosine	C9H11NO3	0	C00082		OUYCCCASQSFEME-QMMMGPOBSA-N
tyr__L_e	L-Tyrosine	C9H11NO3	0	C00082		OUYCCCASQSFEME-QMMMGPOBSA-N
tyr4_c	Tetra-L-tyrosine	C36H38N4O9	0	C01960	(generic tetra-peptide)		(no InChI key)
tyr4_e	Tetra-L-tyrosine	C36H38N4O9	0	C01960	(generic tetra-peptide)		(no InChI key)
tyrtrna_c	L-Tyrosyl-tRNA(Tyr)	C9H10NO2R	1	C02839			(no InChI key)
udp_c	UDP	C9H11N2O12P2	-3	C00015		XCCTYIAWTASOJW-XVFCMESISA-N
udpg_c	UDP-glucose	C15H22N2O17P2	-2	C00029		HSCJRCZFDFQWRP-JZMIEXBBSA-N
udpgal_c	UDP-galactose	C15H22N2O17P2	-2	C00052		HSCJRCZFDFQWRP-WBRQRZOHSA-N
udpgalfur_c	UDP-galactofuranose	C15H22N2O17P2	-2	C03733		ZQLQOXLUCGXKHS-SIAUPFDVSA-N
udpgltn_c	UDP-galactan	C537H892N2O452P2	-2		(not in KEGG)		(no InChI key)
ump_c	UMP	C9H11N2O9P	-2	C00105		DJJCXFVJDGTHFX-XVFCMESISA-N
ura_c	Uracil	C4H4N2O2	0	C00106		ISAKRJDGNUQOIC-UHFFFAOYSA-N
ura_e	Uracil	C4H4N2O2	0	C00106		ISAKRJDGNUQOIC-UHFFFAOYSA-N
uri_c	Uridine	C9H12N2O6	0	C00299		DRTQHJPVMGBUCF-XVFCMESISA-N
uri_e	Uridine	C9H12N2O6	0	C00299		DRTQHJPVMGBUCF-XVFCMESISA-N
utp_c	UTP	C9H11N2O15P3	-4	C00075		PGAVKCOVUIYSFO-XVFCMESISA-N
val__L_c	L-Valine	C5H11NO2	0	C00183		KZSNJWFQEVHDMF-BYPYZUCNSA-N
val__L_e	L-Valine	C5H11NO2	0	C00183		KZSNJWFQEVHDMF-BYPYZUCNSA-N
val4_c	Tetra-L-valine	C20H38N4O5	0	C01960	(generic tetra-peptide)		(no InChI key)
val4_e	Tetra-L-valine	C20H38N4O5	0	C01960	(generic tetra-peptide)		(no InChI key)
valtrna_c	L-Valyl-tRNA(Val)	C5H10NOR	1	C02554			(no InChI key)
xu5p__D_c	D-Xylulose 5-phosphate	C5H9O8P	-2	C00231		FNZLKVNUWIIPSJ-RFZPGFLSSA-N
