# Supplementary material for: Essential metabolism for a minimal cell
Source: eLife. 2019 Jan 18;8:e36842. doi: 10.7554/eLife.36842 (PMC6609329; doi:10.7554/eLife.36842)
Supplement: Supplementary file 5. [file elife-36842-supp5.xlsx]

## Sheet: Proteomics
						Normalized summed signal-to-noise ratio												Normalized relative abundance			Absolute abundance (copy number per average cell)
Protein	NCBI Description	%Coverage	Peptides	Length	Total Area	Time point 1, replicate 1	Time point 1, replicate 2	Time point 1, replicate 3	Time point 1, median	Time point 2, replicate 1	Time point 2, replicate 2	Time point 2, replicate 3	Time point 2, median	Time point 3, replicate 1	Time point 3, replicate 2	Time point 3, replicate 3	Time point 3, median	Time point 1, median	Time point 2, median	Time point 3, median	Time point 1, median	Time point 2, median	Time point 3, median
AOE93218.1	chromosomal replication initiator protein DnaA [synthetic bacterium JCVI-Syn3.0]	72.8889	88	451	28000000000	2.99681e+09	2.93258e+09	2.80221e+09	2.93258e+09	2.92484e+09	2.85754e+09	3.10437e+09	2.92484e+09	3.50386e+09	3.50154e+09	3.37626e+09	3.50154e+09	0.0019189	0.00179326	0.00217493	147.809	138.132	167.53
AOE93219.1	DNA polymerase III subunit beta [synthetic bacterium JCVI-Syn3.0]	64.8	76	376	38000000000	4.39895e+09	4.21288e+09	4.22787e+09	4.22787e+09	4.02715e+09	4.3706e+09	3.99845e+09	4.02715e+09	4.22097e+09	4.24009e+09	4.30304e+09	4.24009e+09	0.00276647	0.00246911	0.00263367	213.096	190.191	202.866
AOE93220.1	ribonuclease M5 [synthetic bacterium JCVI-Syn3.0]	60	14	181	12000000000	1.29592e+09	1.29883e+09	1.26417e+09	1.29592e+09	1.34558e+09	1.41717e+09	1.3784e+09	1.3784e+09	1.32579e+09	1.32333e+09	1.35079e+09	1.32579e+09	0.000847976	0.000845121	0.000823496	65.3179	65.098	63.4323
AOE93221.1	16S rRNA (adenine(1518)-N(6)/adenine(1519)-N(6))-dimethyltransferase [synthetic bacterium JCVI-Syn3.0]	51.5038	21	267	7000000000	8.09263e+08	7.71852e+08	8.01864e+08	8.01864e+08	7.34818e+08	7.60717e+08	7.53903e+08	7.53903e+08	7.55899e+08	7.74987e+08	8.36695e+08	7.74987e+08	0.000524693	0.00046223	0.000481371	40.416	35.6046	37.0791
AOE93222.1	hypothetical protein JCVSYN2_00025 [synthetic bacterium JCVI-Syn3.0]	46.5565	37	364	14000000000	1.40535e+09	1.48431e+09	1.4319e+09	1.4319e+09	1.74815e+09	1.73265e+09	1.59697e+09	1.73265e+09	1.62789e+09	1.53192e+09	1.44086e+09	1.53192e+09	0.000936948	0.00106232	0.000951531	72.1712	81.8281	73.2945
AOE93223.1	DNA gyrase subunit B [synthetic bacterium JCVI-Syn3.0]	49.2114	94	635	39000000000	4.97622e+09	4.83386e+09	4.7548e+09	4.83386e+09	3.82396e+09	3.77579e+09	4.02798e+09	3.82396e+09	4.23421e+09	4.18863e+09	4.38455e+09	4.23421e+09	0.003163	0.00234453	0.00263001	243.639	180.594	202.585
AOE93224.1	DNA gyrase subunit A [synthetic bacterium JCVI-Syn3.0]	50.9592	128	835	49000000000	5.91832e+09	5.90361e+09	5.96882e+09	5.91832e+09	5.08596e+09	4.61695e+09	4.80772e+09	4.80772e+09	5.69984e+09	5.50193e+09	5.49685e+09	5.50193e+09	0.0038726	0.00294769	0.00341744	298.299	227.055	263.239
AOE93225.1	ABC transporter permease [synthetic bacterium JCVI-Syn3.0]	15.3846	4	326	940000000	9.23136e+07	9.52474e+07	1.24555e+08	9.52474e+07	1.06668e+08	8.34282e+07	9.08202e+07	9.08202e+07	1.11999e+08	1.39233e+08	9.57358e+07	1.11999e+08	6.23243e-05	5.56833e-05	6.95666e-05	4.80072	4.28917	5.35858
AOE93226.1	ABC transporter permease [synthetic bacterium JCVI-Syn3.0]	36.7251	79	856	36000000000	3.4312e+09	3.55298e+09	3.47897e+09	3.47897e+09	4.32285e+09	4.37807e+09	4.05086e+09	4.32285e+09	4.39228e+09	4.19435e+09	4.19845e+09	4.19845e+09	0.00227643	0.0026504	0.0026078	175.349	204.155	200.874
AOE93227.1	sugar ABC transporter ATP-binding protein [synthetic bacterium JCVI-Syn3.0]	54.461	99	539	29000000000	3.02888e+09	2.87957e+09	2.83782e+09	2.87957e+09	3.18608e+09	3.11664e+09	3.60566e+09	3.18608e+09	3.30432e+09	3.47016e+09	3.57087e+09	3.47016e+09	0.00188422	0.00195344	0.00215544	145.138	150.469	166.029
AOE93228.1	sugar ABC transporter substrate-binding protein [synthetic bacterium JCVI-Syn3.0]	54.1971	92	549	17000000000	1.60399e+09	1.60457e+09	1.57431e+09	1.60399e+09	1.98731e+09	1.95027e+09	2.17706e+09	1.98731e+09	2.05335e+09	2.04661e+09	2.00253e+09	2.04661e+09	0.00104956	0.00121845	0.00127122	80.8453	93.8546	97.9197
AOE93229.1	methionine--tRNA ligase [synthetic bacterium JCVI-Syn3.0]	45.5796	58	510	47000000000	4.76533e+09	4.92934e+09	4.91347e+09	4.91347e+09	5.43041e+09	5.54147e+09	5.26823e+09	5.43041e+09	5.30623e+09	5.45905e+09	5.38646e+09	5.38646e+09	0.00321509	0.00332947	0.00334572	247.652	256.462	257.714
AOE93230.1	30S ribosomal protein S18 [synthetic bacterium JCVI-Syn3.0]	65.3333	55	76	48000000000	3.97166e+09	4.16268e+09	4.1407e+09	4.1407e+09	6.47708e+09	6.42305e+09	5.07638e+09	6.42305e+09	6.12742e+09	5.90133e+09	5.7197e+09	5.90133e+09	0.00270943	0.00393807	0.00366552	208.702	303.342	282.348
AOE93231.1	single-stranded DNA-binding protein [synthetic bacterium JCVI-Syn3.0]	26.0274	13	147	19000000000	2.20383e+09	2.12004e+09	1.96906e+09	2.12004e+09	2.2179e+09	2.57433e+09	2.154e+09	2.2179e+09	1.80148e+09	2.01747e+09	1.9419e+09	1.9419e+09	0.00138723	0.00135983	0.00120618	106.856	104.745	92.9096
AOE93233.1	FMN-dependent NADH-azoreductase [synthetic bacterium JCVI-Syn3.0]	93.4673	127	200	55000000000	5.26028e+09	5.58401e+09	5.86903e+09	5.58401e+09	5.84125e+09	6.03558e+09	6.39837e+09	6.03558e+09	6.36006e+09	6.9468e+09	6.70462e+09	6.70462e+09	0.00365385	0.00370051	0.00416447	281.448	285.043	320.781
AOE93234.1	ABC transporter ATP-binding protein [synthetic bacterium JCVI-Syn3.0]	78.4884	115	345	70000000000	7.58695e+09	7.3119e+09	7.47317e+09	7.47317e+09	8.24375e+09	8.02147e+09	7.24174e+09	8.02147e+09	7.99397e+09	7.90541e+09	8.22165e+09	7.99397e+09	0.00489	0.00491809	0.00496533	376.667	378.83	382.469
AOE93235.1	STREFT protein [synthetic bacterium JCVI-Syn3.0]	37.0722	59	1053	9800000000	1.20091e+09	1.23479e+09	1.19001e+09	1.20091e+09	9.52103e+08	1.03808e+09	1.12065e+09	1.03808e+09	1.02741e+09	1.01745e+09	1.0186e+09	1.0186e+09	0.000785802	0.000636465	0.000632688	60.5288	49.0256	48.7347
AOE93236.1	ABC transporter permease [synthetic bacterium JCVI-Syn3.0]	22.117	29	1796	1500000000	1.72414e+08	1.76171e+08	1.74597e+08	1.74597e+08	1.96532e+08	2.05248e+08	1.77375e+08	1.96532e+08	1.33493e+08	1.31185e+08	1.32985e+08	1.32985e+08	0.000114246	0.000120497	8.26018e-05	8.80011	9.28161	6.36265
AOE93237.1	cell division protein FtsH [synthetic bacterium JCVI-Syn3.0]	52.3148	138	649	24000000000	2.89572e+09	2.93209e+09	2.96655e+09	2.93209e+09	2.55947e+09	2.59522e+09	2.33962e+09	2.55947e+09	2.54811e+09	2.5196e+09	2.6436e+09	2.54811e+09	0.00191859	0.00156925	0.00158272	147.785	120.876	121.914
AOE93238.1	tRNA lysidine(34) synthetase TilS [synthetic bacterium JCVI-Syn3.0]	60.0998	55	402	7700000000	7.77927e+08	8.0713e+08	7.68029e+08	7.77927e+08	9.4769e+08	9.08971e+08	8.48544e+08	9.08971e+08	8.83833e+08	8.83625e+08	8.7425e+08	8.83625e+08	0.00050903	0.000557304	0.00054885	39.2095	42.928	42.2768
AOE93239.1	RpiR family transcriptional regulator [synthetic bacterium JCVI-Syn3.0]	57.4545	43	276	25000000000	2.16296e+09	2.39174e+09	2.50148e+09	2.39174e+09	3.63224e+09	3.17864e+09	2.53619e+09	3.17864e+09	2.85697e+09	2.89884e+09	2.84094e+09	2.85697e+09	0.00156502	0.00194887	0.00177456	120.55	150.118	136.691
AOE93240.1	DNA methyltransferase [synthetic bacterium JCVI-Syn3.0]	35.8333	12	241	4200000000	4.50688e+08	4.25507e+08	4.39134e+08	4.39134e+08	4.60044e+08	5.65858e+08	4.4646e+08	4.60044e+08	4.30462e+08	4.90797e+08	4.9105e+08	4.90797e+08	0.000287343	0.00028206	0.000304851	22.1335	21.7265	23.4821
AOE93241.1	DNA polymerase III subunit delta [synthetic bacterium JCVI-Syn3.0]	31.3008	17	247	4500000000	6.37932e+08	6.32878e+08	6.30928e+08	6.32878e+08	4.28917e+08	4.93086e+08	5.05955e+08	4.93086e+08	3.60662e+08	4.21172e+08	3.8847e+08	3.8847e+08	0.000414118	0.000302319	0.000241292	31.8987	23.287	18.5863
AOE93242.1	dTMP kinase [synthetic bacterium JCVI-Syn3.0]	40.8451	21	214	16000000000	1.83039e+09	1.8298e+09	1.74366e+09	1.8298e+09	1.85136e+09	1.92727e+09	1.63123e+09	1.85136e+09	1.67287e+09	1.76127e+09	1.75215e+09	1.75215e+09	0.00119732	0.0011351	0.00108832	92.2269	87.4343	83.8312
AOE93243.1	recombination protein RecR [synthetic bacterium JCVI-Syn3.0]	22.9592	16	197	5400000000	6.62317e+08	6.64619e+08	6.72956e+08	6.64619e+08	6.63138e+08	6.95732e+08	5.59782e+08	6.63138e+08	4.79051e+08	4.96472e+08	5.05932e+08	4.96472e+08	0.000434888	0.000406581	0.000308376	33.4985	31.3181	23.7536
AOE93244.1	DNA polymerase III, subunit gamma and tau [synthetic bacterium JCVI-Syn3.0]	38.024	46	669	17000000000	2.24751e+09	2.20072e+09	2.26624e+09	2.24751e+09	1.71053e+09	1.62542e+09	1.92289e+09	1.71053e+09	1.67204e+09	1.70412e+09	1.65052e+09	1.67204e+09	0.00147064	0.00104875	0.00103856	113.28	80.7835	79.9984
AOE93245.1	peroxiredoxin [synthetic bacterium JCVI-Syn3.0]	73.8255	60	150	27000000000	3.10832e+09	3.09431e+09	3.228e+09	3.10832e+09	3.21267e+09	2.6556e+09	3.05996e+09	3.05996e+09	2.98078e+09	2.92486e+09	2.7355e+09	2.92486e+09	0.0020339	0.00187611	0.00181673	156.667	144.513	139.939
AOE93246.1	hypothetical protein JCVSYN2_00165 [synthetic bacterium JCVI-Syn3.0]	13.1387	10	275	2900000000	1.9357e+08	1.85281e+08	1.94906e+08	1.9357e+08	3.80723e+08	4.44995e+08	2.93429e+08	3.80723e+08	4.06272e+08	3.9973e+08	4.01092e+08	4.01092e+08	0.000126661	0.000233428	0.000249132	9.75643	17.9805	19.1902
AOE93247.1	serine--tRNA ligase [synthetic bacterium JCVI-Syn3.0]	67.5355	111	423	46000000000	4.64873e+09	4.87736e+09	5.10638e+09	4.87736e+09	5.4816e+09	5.78235e+09	4.72226e+09	5.4816e+09	5.07397e+09	5.32365e+09	4.98369e+09	5.07397e+09	0.00319146	0.00336085	0.00315162	245.831	258.88	242.763
AOE93248.1	tRNA dihydrouridine synthase DusB [synthetic bacterium JCVI-Syn3.0]	68.8272	40	325	16000000000	1.43804e+09	1.40241e+09	1.38408e+09	1.40241e+09	2.04769e+09	2.10454e+09	1.95471e+09	2.04769e+09	1.87496e+09	1.885e+09	1.90857e+09	1.885e+09	0.000917652	0.00125547	0.00117084	70.6849	96.7065	90.1873
AOE93249.1	lysine--tRNA ligase [synthetic bacterium JCVI-Syn3.0]	55.2	104	501	37000000000	4.24774e+09	4.23639e+09	4.17753e+09	4.23639e+09	3.67221e+09	4.00264e+09	4.07942e+09	4.00264e+09	4.05615e+09	4.2315e+09	4.29643e+09	4.2315e+09	0.00277204	0.00245408	0.00262833	213.525	189.033	202.455
AOE93250.1	thioredoxin [synthetic bacterium JCVI-Syn3.0]	71.5686	129	103	84000000000	8.28782e+09	8.45077e+09	8.59971e+09	8.45077e+09	1.14896e+10	1.16826e+10	9.01029e+09	1.14896e+10	8.09175e+09	9.27064e+09	9.11682e+09	9.11682e+09	0.00552969	0.00704447	0.00566277	425.941	542.621	436.192
AOE93251.1	HAD family hydrolase [synthetic bacterium JCVI-Syn3.0]	73.2143	114	281	99000000000	7.18812e+09	7.35711e+09	7.54459e+09	7.35711e+09	1.14835e+10	1.28814e+10	1.18699e+10	1.18699e+10	1.3079e+10	1.37755e+10	1.38209e+10	1.37755e+10	0.00481406	0.00727763	0.00855643	370.817	560.581	659.085
AOE93252.1	asparagine--tRNA ligase [synthetic bacterium JCVI-Syn3.0]	62.3348	88	455	130000000000	1.435e+10	1.46019e+10	1.48543e+10	1.46019e+10	1.28533e+10	1.27408e+10	1.46582e+10	1.28533e+10	1.53539e+10	1.54337e+10	1.51538e+10	1.53539e+10	0.00955461	0.00788056	0.00953685	735.973	607.024	734.605
AOE93254.1	tRNA (adenosine(37)-N6)-threonylcarbamoyltransferase complex transferase subunit TsaD [synthetic bacterium JCVI-Syn3.0]	55.6604	35	319	7100000000	7.0581e+08	7.46366e+08	7.72519e+08	7.46366e+08	6.78631e+08	7.83456e+08	8.36345e+08	7.83456e+08	8.44691e+08	8.76946e+08	8.55236e+08	8.55236e+08	0.000488378	0.000480349	0.000531217	37.6188	37.0003	40.9186
AOE93255.1	hypothetical protein JCVSYN2_00235 [synthetic bacterium JCVI-Syn3.0]	58.9041	18	74	5000000000	5.0718e+08	5.37548e+08	5.14266e+08	5.14266e+08	5.99881e+08	6.06405e+08	5.50671e+08	5.99881e+08	5.64689e+08	5.66015e+08	5.53345e+08	5.64689e+08	0.000336505	0.000367796	0.000350748	25.9203	28.3306	27.0174
AOE93256.1	tRNA uridine(34) 5-carboxymethylaminomethyl synthesis GTPase MnmE [synthetic bacterium JCVI-Syn3.0]	40.9292	41	453	29000000000	2.96329e+09	3.05173e+09	3.00939e+09	3.00939e+09	3.43972e+09	3.55032e+09	3.0403e+09	3.43972e+09	3.24738e+09	3.24473e+09	3.45314e+09	3.24738e+09	0.00196917	0.00210895	0.00201706	151.681	162.448	155.37
AOE93257.1	30S ribosomal protein S20 [synthetic bacterium JCVI-Syn3.0]	24.6914	20	82	35000000000	3.47161e+09	3.96513e+09	3.77478e+09	3.77478e+09	5.19722e+09	4.55359e+09	3.66442e+09	4.55359e+09	3.47897e+09	3.56355e+09	3.33073e+09	3.47897e+09	0.00246999	0.00279188	0.00216091	190.259	215.053	166.45
AOE93259.1	preprotein translocase subunit SecA [synthetic bacterium JCVI-Syn3.0]	61.3347	244	945	100000000000	1.15294e+10	1.13722e+10	1.11178e+10	1.13722e+10	1.13527e+10	1.10746e+10	1.045e+10	1.10746e+10	1.0845e+10	1.0932e+10	1.13263e+10	1.0932e+10	0.00744127	0.00679002	0.00679024	573.187	523.022	523.039
AOE93260.1	5'-3' exonuclease [synthetic bacterium JCVI-Syn3.0]	66.9967	46	304	11000000000	1.40022e+09	1.44428e+09	1.39507e+09	1.40022e+09	1.42622e+09	1.41663e+09	1.44101e+09	1.42622e+09	8.36333e+08	8.68251e+08	7.71978e+08	8.36333e+08	0.000916222	0.00087444	0.000519475	70.5748	67.3564	40.0141
AOE93261.1	exodeoxyribonuclease VII small subunit [synthetic bacterium JCVI-Syn3.0]	67.6056	12	72	1400000000	1.43339e+08	1.36555e+08	1.18683e+08	1.36555e+08	2.1619e+08	2.07355e+08	1.58893e+08	2.07355e+08	1.40172e+08	1.35793e+08	1.43022e+08	1.40172e+08	8.93536e-05	0.000127132	8.70654e-05	6.88273	9.79275	6.70648
AOE93262.1	exodeoxyribonuclease VII large subunit [synthetic bacterium JCVI-Syn3.0]	40.2985	21	470	2600000000	2.90797e+08	2.85347e+08	3.03624e+08	2.90797e+08	2.53885e+08	2.73856e+08	3.15777e+08	2.73856e+08	2.94649e+08	2.91949e+08	2.90116e+08	2.91949e+08	0.00019028	0.000167906	0.00018134	14.6569	12.9334	13.9682
AOE93263.1	transcription antitermination factor NusB [synthetic bacterium JCVI-Syn3.0]	28.0303	6	133	3300000000	3.47606e+08	3.50747e+08	3.52528e+08	3.50747e+08	3.45904e+08	3.93491e+08	3.71089e+08	3.71089e+08	3.84601e+08	3.85332e+08	3.68703e+08	3.84601e+08	0.000229508	0.00022752	0.000238889	17.6785	17.5254	18.4012
AOE93264.1	lipoprotein [synthetic bacterium JCVI-Syn3.0]	67.8378	40	371	13000000000	1.37214e+09	1.34722e+09	1.36618e+09	1.36618e+09	1.52482e+09	1.40783e+09	1.43441e+09	1.43441e+09	1.45383e+09	1.50882e+09	1.58476e+09	1.50882e+09	0.000893947	0.000879457	0.000937181	68.8589	67.7428	72.1892
AOE93265.1	deoxyribonuclease IV [synthetic bacterium JCVI-Syn3.0]	49.481	22	290	4400000000	4.40899e+08	4.42257e+08	4.71848e+08	4.42257e+08	5.03797e+08	5.27348e+08	4.49097e+08	5.03797e+08	4.79701e+08	5.50829e+08	5.34223e+08	5.34223e+08	0.000289387	0.000308886	0.000331824	22.2909	23.7929	25.5598
AOE93266.1	glycosyl transferase [synthetic bacterium JCVI-Syn3.0]	32.0713	15	450	10000000000	1.57714e+09	1.61435e+09	1.56028e+09	1.57714e+09	9.78985e+08	1.0206e+09	1.30397e+09	1.0206e+09	6.8048e+08	6.74317e+08	5.89877e+08	6.74317e+08	0.00103199	0.000625748	0.000418842	79.4918	48.2001	32.2625
AOE93267.1	glycosyl transferase [synthetic bacterium JCVI-Syn3.0]	22.2222	11	307	6500000000	8.61381e+08	8.5875e+08	8.29582e+08	8.5875e+08	5.71894e+08	6.1692e+08	7.45166e+08	6.1692e+08	6.84479e+08	7.00972e+08	6.30856e+08	6.84479e+08	0.000561915	0.000378244	0.000425154	43.2832	29.1353	32.7487
AOE93268.1	UTP--glucose-1-phosphate uridylyltransferase [synthetic bacterium JCVI-Syn3.0]	72.7586	83	291	79000000000	6.60225e+09	6.66559e+09	7.10338e+09	6.66559e+09	1.08587e+10	1.08269e+10	1.14749e+10	1.08587e+10	8.5045e+09	8.65752e+09	8.30626e+09	8.5045e+09	0.00436157	0.00665766	0.00528244	335.963	512.826	406.896
AOE93269.1	hypothetical protein JCVSYN2_00305 [synthetic bacterium JCVI-Syn3.0]	59.589	19	147	14000000000	1.0992e+09	1.23589e+09	1.23068e+09	1.23068e+09	1.80557e+09	1.81079e+09	1.83052e+09	1.81079e+09	1.71339e+09	1.69347e+09	1.58049e+09	1.69347e+09	0.000805282	0.00111023	0.00105187	62.0293	85.5185	81.0235
AOE93270.1	acyl-phosphate glycerol 3-phosphate acyltransferase [synthetic bacterium JCVI-Syn3.0]	9.88142	4	254	180000000	2.35379e+07	2.43497e+07	2.61241e+07	2.43497e+07	1.53565e+07	8.4156e+06	2.25739e+07	1.53565e+07	2.33552e+07	2.06196e+07	1.56675e+07	2.06196e+07	1.5933e-05	9.41534e-06	1.28075e-05	1.22729	0.725245	0.986537
AOE93271.1	glutamate--tRNA ligase [synthetic bacterium JCVI-Syn3.0]	61.9048	70	484	28000000000	2.74256e+09	2.7304e+09	2.71988e+09	2.7304e+09	3.46189e+09	3.84772e+09	2.99073e+09	3.46189e+09	3.25163e+09	3.04576e+09	3.20944e+09	3.20944e+09	0.00178661	0.00212254	0.00199349	137.619	163.495	153.555
AOE93272.1	HD family phosphohydrolase [synthetic bacterium JCVI-Syn3.0]	45.7921	35	405	10000000000	1.09179e+09	9.99269e+08	1.02322e+09	1.02322e+09	9.36261e+08	9.61074e+08	1.10978e+09	9.61074e+08	1.25761e+09	1.25849e+09	1.3625e+09	1.25849e+09	0.000669536	0.00058925	0.000781694	51.573	45.3887	60.2123
AOE93273.1	DNA-directed RNA polymerase subunit delta [synthetic bacterium JCVI-Syn3.0]	52.8169	26	143	3700000000	4.35127e+08	4.13097e+08	4.27721e+08	4.27721e+08	5.63358e+08	5.53091e+08	5.25758e+08	5.53091e+08	2.60323e+08	2.59856e+08	2.6167e+08	2.60323e+08	0.000279876	0.000339109	0.000161696	21.5583	26.1209	12.4551
AOE93274.1	CTP synthase [synthetic bacterium JCVI-Syn3.0]	69.1729	167	533	95000000000	6.07356e+09	6.05439e+09	6.27599e+09	6.07356e+09	1.22677e+10	1.3003e+10	1.19352e+10	1.22677e+10	1.30538e+10	1.28948e+10	1.34415e+10	1.30538e+10	0.00397418	0.00752154	0.00810819	306.123	579.369	624.558
AOE93275.1	fructose-1,6-bisphosphate aldolase, class II [synthetic bacterium JCVI-Syn3.0]	58.5859	162	298	46000000000	4.50683e+09	4.66934e+09	4.49522e+09	4.50683e+09	5.30366e+09	4.9729e+09	5.35937e+09	5.30366e+09	5.27609e+09	5.78501e+09	5.63158e+09	5.63158e+09	0.002949	0.00325176	0.00349797	227.156	250.476	269.442
AOE93276.1	AAA family ATPase [synthetic bacterium JCVI-Syn3.0]	52.4079	36	354	16000000000	1.85068e+09	1.83943e+09	1.84377e+09	1.84377e+09	1.71307e+09	1.90917e+09	1.57747e+09	1.71307e+09	1.69198e+09	1.7028e+09	1.87163e+09	1.7028e+09	0.00120645	0.00105031	0.00105767	92.9307	80.9032	81.4702
AOE93277.1	hypothetical protein JCVSYN2_00345 [synthetic bacterium JCVI-Syn3.0]	54.9538	80	758	14000000000	1.69527e+09	1.73952e+09	1.81614e+09	1.73952e+09	1.36318e+09	1.36927e+09	1.39223e+09	1.36927e+09	1.53882e+09	1.5533e+09	1.53227e+09	1.53882e+09	0.00113824	0.000839521	0.000955816	87.6761	64.6666	73.6246
AOE93278.1	50S ribosomal protein L31 [synthetic bacterium JCVI-Syn3.0]	54.3478	16	93	7100000000	8.82412e+08	1.0716e+09	8.6648e+08	8.82412e+08	7.14076e+08	6.61047e+08	9.51893e+08	7.14076e+08	6.91446e+08	7.80661e+08	4.80382e+08	6.91446e+08	0.000577399	0.000437811	0.000429481	44.4759	33.7237	33.0821
AOE93279.1	hypothetical protein JCVSYN2_00355 [synthetic bacterium JCVI-Syn3.0]	43.9873	54	633	24000000000	2.22407e+09	2.14936e+09	2.13623e+09	2.14936e+09	2.27706e+09	2.72644e+09	3.0859e+09	2.72644e+09	3.07844e+09	3.23185e+09	3.09065e+09	3.09065e+09	0.00140641	0.00167163	0.00191971	108.333	128.762	147.872
AOE93280.1	phosphoesterase [synthetic bacterium JCVI-Syn3.0]	43.038	39	317	33000000000	4.01245e+09	3.70823e+09	3.56281e+09	3.70823e+09	3.12884e+09	3.18945e+09	3.78433e+09	3.18945e+09	3.63275e+09	4.0588e+09	3.92233e+09	3.92233e+09	0.00242645	0.0019555	0.00243629	186.905	150.628	187.663
AOE93281.1	thymidine kinase [synthetic bacterium JCVI-Syn3.0]	50.2392	17	210	40000000000	3.62884e+09	4.00917e+09	4.68552e+09	4.00917e+09	5.66383e+09	4.61735e+09	3.95807e+09	4.61735e+09	4.87905e+09	4.35607e+09	4.20211e+09	4.35607e+09	0.00262336	0.00283097	0.0027057	202.072	218.064	208.415
AOE93282.1	peptide chain release factor 1 [synthetic bacterium JCVI-Syn3.0]	55.7692	52	365	61000000000	6.544e+09	6.83592e+09	6.49869e+09	6.544e+09	7.17562e+09	6.41799e+09	7.10648e+09	7.10648e+09	7.22521e+09	6.84782e+09	6.34827e+09	6.84782e+09	0.004282	0.0043571	0.00425342	329.834	335.618	327.632
AOE93283.1	protein-(glutamine-N5) methyltransferase, release factor-specific [synthetic bacterium JCVI-Syn3.0]	48.9362	24	283	3000000000	3.39869e+08	3.1831e+08	3.42191e+08	3.39869e+08	2.98325e+08	3.29367e+08	3.54328e+08	3.29367e+08	3.29563e+08	3.39567e+08	3.48478e+08	3.39567e+08	0.00022239	0.00020194	0.000210917	17.1303	15.5551	16.2465
AOE93284.1	hypothetical protein JCVSYN2_00380 [synthetic bacterium JCVI-Syn3.0]	16.7347	19	491	6300000000	7.84457e+08	8.11134e+08	7.5425e+08	7.84457e+08	5.71879e+08	5.92621e+08	7.07955e+08	5.92621e+08	7.09635e+08	6.8284e+08	6.8523e+08	6.8523e+08	0.000513302	0.000363345	0.00042562	39.5386	27.9878	32.7847
AOE93285.1	translation factor [synthetic bacterium JCVI-Syn3.0]	39.759	13	167	12000000000	1.11163e+09	1.04286e+09	1.09369e+09	1.09369e+09	1.78928e+09	1.57835e+09	1.3628e+09	1.57835e+09	1.39487e+09	1.31769e+09	1.30881e+09	1.31769e+09	0.000715649	0.000967709	0.000818466	55.125	74.5407	63.0448
AOE93286.1	hypothetical protein JCVSYN2_00390 [synthetic bacterium JCVI-Syn3.0]	60.1974	69	305	31000000000	3.26395e+09	3.2386e+09	3.50651e+09	3.26395e+09	3.19841e+09	3.30247e+09	3.38417e+09	3.30247e+09	3.57828e+09	3.66355e+09	3.86406e+09	3.66355e+09	0.00213574	0.00202479	0.00227556	164.512	155.966	175.282
AOE93287.1	hypothetical protein JCVSYN2_00395 [synthetic bacterium JCVI-Syn3.0]	19.5745	9	236	4400000000	5.69707e+08	5.61861e+08	5.63678e+08	5.63678e+08	4.31004e+08	5.39117e+08	5.23343e+08	5.23343e+08	3.96391e+08	4.06752e+08	4.08147e+08	4.06752e+08	0.000368837	0.00032087	0.000252648	28.4108	24.716	19.461
AOE93288.1	cardiolipin synthase [synthetic bacterium JCVI-Syn3.0]	33.3988	23	510	2400000000	3.00724e+08	3.00631e+08	2.97789e+08	3.00631e+08	2.25113e+08	2.70825e+08	2.4809e+08	2.4809e+08	2.50498e+08	2.51964e+08	2.54366e+08	2.51964e+08	0.000196715	0.000152108	0.000156504	15.1526	11.7166	12.0552
AOE93289.1	30S ribosomal protein S12 [synthetic bacterium JCVI-Syn3.0]	44.6043	22	140	23000000000	2.41556e+09	2.72178e+09	2.34711e+09	2.41556e+09	2.87265e+09	1.96162e+09	3.1444e+09	2.87265e+09	3.02088e+09	2.48406e+09	2.03196e+09	2.48406e+09	0.0015806	0.00176126	0.00154293	121.75	135.667	118.849
AOE93290.1	30S ribosomal protein S7 [synthetic bacterium JCVI-Syn3.0]	54.8387	70	156	100000000000	9.45043e+09	1.01689e+10	9.88153e+09	9.88153e+09	1.46991e+10	1.18292e+10	1.08598e+10	1.18292e+10	1.09933e+10	1.10686e+10	1.10491e+10	1.10491e+10	0.00646589	0.00725267	0.00686301	498.055	558.659	528.644
AOE93291.1	translation elongation factor G [synthetic bacterium JCVI-Syn3.0]	79.1001	325	690	120000000000	1.33838e+10	1.29528e+10	1.33415e+10	1.33415e+10	1.43158e+10	1.35465e+10	1.30892e+10	1.35465e+10	1.27722e+10	1.30808e+10	1.35174e+10	1.30808e+10	0.00872987	0.00830558	0.00812495	672.444	639.762	625.848
AOE93292.1	translation elongation factor Tu [synthetic bacterium JCVI-Syn3.0]	75.1899	329	396	110000000000	1.07514e+10	1.05505e+10	1.11222e+10	1.07514e+10	1.4217e+10	1.45737e+10	1.13207e+10	1.4217e+10	1.24038e+10	1.20521e+10	1.30087e+10	1.24038e+10	0.00703508	0.00871664	0.00770441	541.898	671.425	593.455
AOE93293.1	alanine--tRNA ligase [synthetic bacterium JCVI-Syn3.0]	56.9196	189	897	95000000000	8.5438e+09	8.59596e+09	8.47133e+09	8.5438e+09	1.21664e+10	1.21321e+10	1.06288e+10	1.21321e+10	1.15823e+10	1.13381e+10	1.15411e+10	1.15411e+10	0.00559056	0.00743839	0.00716857	430.63	572.964	552.18
AOE93294.1	hypothetical protein JCVSYN2_00435 [synthetic bacterium JCVI-Syn3.0]	18.2927	8	165	1400000000	1.76575e+08	1.82387e+08	1.87078e+08	1.82387e+08	1.13241e+08	1.19587e+08	1.75922e+08	1.19587e+08	1.4423e+08	1.40779e+08	1.602e+08	1.4423e+08	0.000119343	7.33208e-05	8.95862e-05	9.19279	5.64775	6.90065
AOE93295.1	ABC transporter permease [synthetic bacterium JCVI-Syn3.0]	23.913	23	415	9500000000	1.25444e+09	1.13466e+09	1.17356e+09	1.17356e+09	7.42168e+08	8.20833e+08	1.05311e+09	8.20833e+08	1.03837e+09	1.08965e+09	1.19321e+09	1.08965e+09	0.000767907	0.000503266	0.000676817	59.1503	38.7655	52.1339
AOE93296.1	peptide ABC transporter permease [synthetic bacterium JCVI-Syn3.0]	16.0714	11	337	13000000000	1.21526e+09	1.27316e+09	1.35643e+09	1.27316e+09	1.44916e+09	1.87275e+09	1.36045e+09	1.44916e+09	1.49402e+09	1.40877e+09	1.56998e+09	1.49402e+09	0.000833082	0.000888504	0.000927988	64.1706	68.4397	71.4811
AOE93297.1	ABC transporter ATP-binding protein [synthetic bacterium JCVI-Syn3.0]	56.3604	98	567	43000000000	4.83462e+09	4.79399e+09	4.77933e+09	4.79399e+09	4.75201e+09	4.55987e+09	4.83225e+09	4.75201e+09	4.89443e+09	4.76422e+09	4.78929e+09	4.78929e+09	0.0031369	0.00291353	0.0029748	241.629	224.423	229.143
AOE93298.1	ABC transporter ATP-binding protein [synthetic bacterium JCVI-Syn3.0]	52.09	91	623	43000000000	4.62569e+09	4.79907e+09	4.7731e+09	4.7731e+09	4.90672e+09	5.05917e+09	4.35581e+09	4.90672e+09	4.97739e+09	4.69066e+09	4.81238e+09	4.81238e+09	0.00312324	0.00300839	0.00298914	240.577	231.73	230.247
AOE93299.1	ABC transporter substrate-binding protein [synthetic bacterium JCVI-Syn3.0]	45.5954	121	1034	55000000000	6.23137e+09	6.3632e+09	5.90333e+09	6.23137e+09	6.02872e+09	6.19987e+09	5.93307e+09	6.02872e+09	6.18817e+09	6.06516e+09	6.08711e+09	6.08711e+09	0.00407744	0.0036963	0.00378092	314.077	284.719	291.236
AOE93300.1	spermidine/putrescine ABC transporter permease [synthetic bacterium JCVI-Syn3.0]	39.3822	107	1037	32000000000	3.5377e+09	3.62856e+09	3.61977e+09	3.61977e+09	3.43762e+09	3.56619e+09	3.31092e+09	3.43762e+09	3.75426e+09	3.50873e+09	3.63625e+09	3.63625e+09	0.00236856	0.00210766	0.0022586	182.446	162.349	173.976
AOE93301.1	ABC transporter permease [synthetic bacterium JCVI-Syn3.0]	16.6667	6	331	3400000000	3.79078e+08	4.794e+08	3.77216e+08	3.79078e+08	3.30195e+08	2.98178e+08	3.95408e+08	3.30195e+08	4.3859e+08	3.6341e+08	3.38525e+08	3.6341e+08	0.000248046	0.000202447	0.000225726	19.1065	15.5941	17.3872
AOE93302.1	spermidine/putrescine ABC transporter ATP-binding protein [synthetic bacterium JCVI-Syn3.0]	52.1368	49	352	42000000000	4.27774e+09	4.11849e+09	4.06959e+09	4.11849e+09	4.19225e+09	4.60531e+09	4.73812e+09	4.60531e+09	5.52509e+09	5.31365e+09	5.15976e+09	5.31365e+09	0.0026949	0.00282359	0.00330049	207.582	217.495	254.23
AOE93303.1	50S ribosomal protein L20 [synthetic bacterium JCVI-Syn3.0]	50.4202	90	120	60000000000	6.16566e+09	6.44012e+09	7.10833e+09	6.44012e+09	7.04369e+09	7.44609e+09	6.43947e+09	7.04369e+09	6.40892e+09	6.49166e+09	6.45606e+09	6.45606e+09	0.00421403	0.0043186	0.00401008	324.598	332.653	308.889
AOE93305.1	translation initiation factor IF-3 [synthetic bacterium JCVI-Syn3.0]	47.5138	54	182	30000000000	3.06109e+09	3.1281e+09	2.99342e+09	3.06109e+09	3.613e+09	3.54307e+09	3.38478e+09	3.54307e+09	3.50567e+09	3.40634e+09	3.36453e+09	3.40634e+09	0.002003	0.00217231	0.0021158	154.287	167.329	162.976
AOE93306.1	peptide deformylase [synthetic bacterium JCVI-Syn3.0]	68	58	201	26000000000	2.97349e+09	3.17009e+09	3.0976e+09	3.0976e+09	2.59001e+09	2.74449e+09	2.85188e+09	2.74449e+09	2.74567e+09	2.9507e+09	2.87608e+09	2.87608e+09	0.00202689	0.00168269	0.00178643	156.127	129.614	137.606
AOE93307.1	16S rRNA (guanine(966)-N(2))-methyltransferase RsmD [synthetic bacterium JCVI-Syn3.0]	47.5676	23	186	27000000000	2.47143e+09	2.48832e+09	2.29189e+09	2.47143e+09	3.57174e+09	3.86041e+09	2.36853e+09	3.57174e+09	3.55542e+09	2.78005e+09	3.61222e+09	3.55542e+09	0.00161716	0.00218989	0.0022084	124.566	168.683	170.108
AOE93308.1	guanylate kinase [synthetic bacterium JCVI-Syn3.0]	65.9933	60	298	34000000000	3.64066e+09	3.71226e+09	3.68105e+09	3.68105e+09	4.15901e+09	4.07953e+09	3.57243e+09	4.07953e+09	3.7611e+09	3.65586e+09	3.73809e+09	3.73809e+09	0.00240866	0.00250122	0.00232186	185.534	192.664	178.848
AOE93309.1	phosphopyruvate hydratase [synthetic bacterium JCVI-Syn3.0]	80.2661	256	452	210000000000	2.00323e+10	1.95146e+10	1.98028e+10	1.98028e+10	2.19384e+10	2.76045e+10	2.50298e+10	2.50298e+10	2.41354e+10	2.49805e+10	2.69618e+10	2.49805e+10	0.0129578	0.0153461	0.0155162	998.11	1182.08	1195.18
AOE93311.1	Holliday junction resolvase [synthetic bacterium JCVI-Syn3.0]	63.6364	17	144	11000000000	9.73233e+08	9.68422e+08	9.47639e+08	9.68422e+08	1.26461e+09	1.3787e+09	1.26808e+09	1.26808e+09	1.36759e+09	1.38593e+09	1.4458e+09	1.38593e+09	0.000633678	0.00077748	0.000860847	48.811	59.8877	66.3093
AOE93312.1	hypoxanthine phosphoribosyltransferase [synthetic bacterium JCVI-Syn3.0]	38.9474	56	191	90000000000	8.98088e+09	8.70447e+09	8.55841e+09	8.70447e+09	1.22148e+10	1.06776e+10	1.03846e+10	1.06776e+10	1.01269e+10	1.0332e+10	1.00205e+10	1.01269e+10	0.00569569	0.00654658	0.00629016	438.728	504.27	484.518
AOE93313.1	glycerol kinase [synthetic bacterium JCVI-Syn3.0]	71.2871	217	506	74000000000	7.66469e+09	7.90031e+09	7.85846e+09	7.85846e+09	8.47909e+09	8.26263e+09	7.73842e+09	8.26263e+09	8.29169e+09	8.82623e+09	8.97848e+09	8.82623e+09	0.00514211	0.00506594	0.00548228	396.087	390.22	422.289
AOE93314.1	6-phosphofructokinase [synthetic bacterium JCVI-Syn3.0]	49.3865	86	327	78000000000	9.10988e+09	8.85757e+09	9.09581e+09	9.09581e+09	8.99325e+09	8.20051e+09	8.89392e+09	8.89392e+09	8.49505e+09	8.36262e+09	7.99139e+09	8.36262e+09	0.00595176	0.005453	0.00519431	458.452	420.034	400.108
AOE93315.1	pyruvate kinase [synthetic bacterium JCVI-Syn3.0]	58.9958	108	479	110000000000	1.10455e+10	1.09264e+10	1.09151e+10	1.09264e+10	1.40534e+10	1.27115e+10	1.21383e+10	1.27115e+10	1.26464e+10	1.2825e+10	1.27383e+10	1.27383e+10	0.00714958	0.00779365	0.00791222	550.718	600.329	609.463
AOE93316.1	threonine--tRNA ligase [synthetic bacterium JCVI-Syn3.0]	58.216	92	640	50000000000	5.88689e+09	6.00328e+09	6.21255e+09	6.00328e+09	5.17506e+09	5.17151e+09	5.15721e+09	5.17151e+09	5.43081e+09	5.55749e+09	5.40521e+09	5.43081e+09	0.00392819	0.00317073	0.00337327	302.581	244.235	259.836
AOE93317.1	branched-chain alpha-keto acid dehydrogenase subunit E2 [synthetic bacterium JCVI-Syn3.0]	66.8934	184	442	34000000000	3.6112e+09	3.58763e+09	3.69807e+09	3.6112e+09	4.1423e+09	3.91463e+09	3.50737e+09	3.91463e+09	3.6873e+09	3.8527e+09	3.9988e+09	3.8527e+09	0.00236296	0.00240012	0.00239305	182.014	184.877	184.332
AOE93318.1	dihydrolipoyl dehydrogenase [synthetic bacterium JCVI-Syn3.0]	72.655	177	630	32000000000	3.65465e+09	3.59894e+09	3.61504e+09	3.61504e+09	3.96758e+09	3.85775e+09	3.62027e+09	3.85775e+09	3.20507e+09	3.19703e+09	3.28366e+09	3.20507e+09	0.00236547	0.00236525	0.00199078	182.207	182.19	153.346
AOE93319.1	phosphate acetyltransferase [synthetic bacterium JCVI-Syn3.0]	45.6522	68	323	60000000000	5.82762e+09	6.05735e+09	5.96203e+09	5.96203e+09	7.24407e+09	8.14368e+09	6.28403e+09	7.24407e+09	6.88443e+09	6.76638e+09	6.83041e+09	6.83041e+09	0.0039012	0.00444145	0.0042426	300.501	342.116	326.799
AOE93321.1	phosphoenolpyruvate--protein phosphotransferase [synthetic bacterium JCVI-Syn3.0]	68.4119	150	574	69000000000	6.78598e+09	7.00973e+09	7.07086e+09	7.00973e+09	8.43285e+09	8.7976e+09	7.32149e+09	8.43285e+09	7.77993e+09	7.92155e+09	7.88001e+09	7.88001e+09	0.00458676	0.00517031	0.00489455	353.309	398.259	377.017
AOE93322.1	PTS glucose transporter subunit IIA [synthetic bacterium JCVI-Syn3.0]	67.5325	74	155	61000000000	5.64595e+09	6.22719e+09	6.65034e+09	6.22719e+09	8.4952e+09	6.11569e+09	6.7198e+09	6.7198e+09	6.83576e+09	7.11357e+09	7.19651e+09	7.11357e+09	0.00407471	0.00412002	0.00441849	313.866	317.357	340.347
AOE93323.1	30S ribosomal protein S4 [synthetic bacterium JCVI-Syn3.0]	61.5385	84	209	33000000000	3.41102e+09	3.39457e+09	3.43455e+09	3.41102e+09	3.89874e+09	3.92986e+09	3.57648e+09	3.89874e+09	3.76391e+09	3.77603e+09	3.81484e+09	3.77603e+09	0.00223197	0.00239038	0.00234542	171.924	184.126	180.663
AOE93324.1	hypothetical protein JCVSYN2_00590 [synthetic bacterium JCVI-Syn3.0]	30.2521	26	596	7800000000	1.10289e+09	1.08801e+09	1.04558e+09	1.08801e+09	6.60703e+08	7.72973e+08	8.33261e+08	7.72973e+08	7.17128e+08	7.81543e+08	7.97913e+08	7.81543e+08	0.000711926	0.000473922	0.000485443	54.8383	36.5053	37.3927
AOE93325.1	tRNA 4-thiouridine(8) synthase ThiI [synthetic bacterium JCVI-Syn3.0]	28.8608	23	396	15000000000	1.89794e+09	1.99727e+09	1.87156e+09	1.89794e+09	1.52304e+09	1.60828e+09	1.53269e+09	1.53269e+09	1.651e+09	1.53913e+09	1.3791e+09	1.53913e+09	0.0012419	0.000939716	0.000956005	95.6612	72.3844	73.6392
AOE93326.1	YihA family ribosome biogenesis GTP-binding protein [synthetic bacterium JCVI-Syn3.0]	61.2245	22	197	12000000000	1.29692e+09	1.2167e+09	1.25316e+09	1.25316e+09	1.23091e+09	1.32619e+09	1.39567e+09	1.32619e+09	1.31878e+09	1.44199e+09	1.51968e+09	1.44199e+09	0.000819994	0.000813106	0.000895671	63.1625	62.6319	68.9918
AOE93327.1	hypothetical protein JCVSYN2_00605 [synthetic bacterium JCVI-Syn3.0]	14.5161	6	187	1800000000	2.72256e+08	2.58634e+08	3.14262e+08	2.72256e+08	9.80899e+07	8.97169e+07	2.57455e+08	9.80899e+07	1.75422e+08	1.86164e+08	1.47999e+08	1.75422e+08	0.000178149	6.01405e-05	0.00010896	13.7224	4.6325	8.39301
AOE93328.1	hypothetical protein JCVSYN2_00610 [synthetic bacterium JCVI-Syn3.0]	32.8125	13	193	8300000000	1.05001e+09	1.04657e+09	1.08933e+09	1.05001e+09	8.85651e+08	9.1414e+08	8.99563e+08	8.99563e+08	8.03891e+08	8.02631e+08	8.08215e+08	8.03891e+08	0.000687062	0.000551536	0.000499324	52.923	42.4837	38.462
AOE93329.1	hypothetical protein JCVSYN2_00615 [synthetic bacterium JCVI-Syn3.0]	47.5983	38	230	57000000000	5.20662e+09	5.30697e+09	5.15897e+09	5.20662e+09	6.84181e+09	6.68849e+09	6.53852e+09	6.68849e+09	6.98233e+09	7.19509e+09	7.0812e+09	7.0812e+09	0.0034069	0.00410082	0.00439838	262.427	315.878	338.798
AOE93330.1	transcription elongation factor GreA [synthetic bacterium JCVI-Syn3.0]	71.3376	73	158	74000000000	7.88816e+09	7.83288e+09	7.85409e+09	7.85409e+09	8.29246e+09	7.74784e+09	8.70889e+09	8.29246e+09	8.62174e+09	8.60808e+09	8.44586e+09	8.60808e+09	0.00513926	0.00508423	0.00534678	395.867	391.628	411.852
AOE93331.1	excinuclease ABC subunit C [synthetic bacterium JCVI-Syn3.0]	52.0548	58	585	14000000000	1.16015e+09	1.15191e+09	1.1449e+09	1.15191e+09	1.78074e+09	1.84532e+09	1.65868e+09	1.78074e+09	1.77204e+09	1.73042e+09	1.75584e+09	1.75584e+09	0.000753743	0.0010918	0.00109062	58.0593	84.0992	84.0079
AOE93332.1	RNase J family beta-CASP ribonuclease [synthetic bacterium JCVI-Syn3.0]	55.5746	136	584	62000000000	6.64671e+09	6.77994e+09	6.53093e+09	6.64671e+09	6.92198e+09	6.67934e+09	6.87398e+09	6.87398e+09	7.58352e+09	7.12603e+09	6.85757e+09	7.12603e+09	0.00434922	0.00421454	0.00442622	335.012	324.638	340.943
AOE93333.1	valine--tRNA ligase [synthetic bacterium JCVI-Syn3.0]	57.2248	122	873	39000000000	4.46155e+09	4.45961e+09	4.39027e+09	4.45961e+09	4.41164e+09	4.59556e+09	3.88541e+09	4.41164e+09	4.22975e+09	4.2151e+09	4.35112e+09	4.22975e+09	0.00291811	0.00270484	0.00262725	224.776	208.349	202.371
AOE93334.1	ribulose-phosphate 3-epimerase [synthetic bacterium JCVI-Syn3.0]	71.5556	55	226	40000000000	4.133e+09	4.1907e+09	4.14302e+09	4.14302e+09	4.34312e+09	4.17479e+09	4.6386e+09	4.34312e+09	4.63949e+09	5.02117e+09	4.71611e+09	4.71611e+09	0.00271095	0.00266283	0.00292934	208.819	205.113	225.641
AOE93336.1	tRNA (N6-adenosine(37)-N6)-threonylcarbamoyltransferase complex ATPase TsaE [synthetic bacterium JCVI-Syn3.0]	33.3333	10	139	2100000000	2.08051e+08	2.13059e+08	1.98615e+08	2.08051e+08	2.18663e+08	2.27149e+08	2.27793e+08	2.27149e+08	2.70695e+08	2.77257e+08	2.58718e+08	2.70695e+08	0.000136136	0.000139268	0.000168138	10.4863	10.7276	12.9514
AOE93337.1	tRNA N6-adenosine(37)-N6-threonylcarbamoyltransferase complex dimerization subunit TsaB [synthetic bacterium JCVI-Syn3.0]	60.4278	34	188	12000000000	1.33553e+09	1.33022e+09	1.32802e+09	1.33022e+09	1.30184e+09	1.24004e+09	1.40704e+09	1.30184e+09	1.38092e+09	1.34781e+09	1.32859e+09	1.34781e+09	0.000870419	0.000798177	0.000837174	67.0466	61.482	64.4858
AOE93338.1	hypothetical protein JCVSYN2_00675 [synthetic bacterium JCVI-Syn3.0]	30.9735	11	227	3200000000	3.77745e+08	3.95335e+08	4.11101e+08	3.95335e+08	3.24084e+08	3.32539e+08	3.17635e+08	3.24084e+08	3.53349e+08	3.35048e+08	3.53164e+08	3.53164e+08	0.000258684	0.000198701	0.000219362	19.9259	15.3055	16.897
AOE93339.1	proline--tRNA ligase [synthetic bacterium JCVI-Syn3.0]	59.4937	65	475	38000000000	4.24616e+09	4.33365e+09	4.43929e+09	4.33365e+09	4.65133e+09	4.82643e+09	3.59438e+09	4.65133e+09	3.94807e+09	4.08962e+09	3.87107e+09	3.94807e+09	0.00283569	0.0028518	0.00245228	218.427	219.669	188.894
AOE93340.1	RNase H [synthetic bacterium JCVI-Syn3.0]	52.6829	21	206	5800000000	7.49655e+08	7.66448e+08	7.2564e+08	7.49655e+08	5.73591e+08	5.62521e+08	6.37946e+08	5.73591e+08	5.93043e+08	6.21961e+08	5.69194e+08	5.93043e+08	0.00049053	0.000351678	0.000368359	37.7846	27.089	28.374
AOE93341.1	elongation factor 4 [synthetic bacterium JCVI-Syn3.0]	61.6667	103	601	22000000000	2.91343e+09	2.77097e+09	2.93781e+09	2.91343e+09	2.33582e+09	2.44059e+09	2.05702e+09	2.33582e+09	2.10019e+09	2.18011e+09	2.26406e+09	2.18011e+09	0.00190638	0.00143213	0.00135414	146.844	110.314	104.307
AOE93342.1	aspartate--tRNA ligase [synthetic bacterium JCVI-Syn3.0]	67.4216	98	575	35000000000	3.80171e+09	3.73774e+09	3.71282e+09	3.73774e+09	3.98273e+09	4.10349e+09	3.94638e+09	3.98273e+09	3.88416e+09	3.94058e+09	3.89039e+09	3.89039e+09	0.00244576	0.00244187	0.00241646	188.392	188.093	186.135
AOE93343.1	histidine--tRNA ligase [synthetic bacterium JCVI-Syn3.0]	55.314	79	415	52000000000	5.00859e+09	4.99775e+09	4.9427e+09	4.99775e+09	6.22704e+09	6.16453e+09	5.79496e+09	6.16453e+09	6.40027e+09	6.21088e+09	6.25329e+09	6.25329e+09	0.00327023	0.00377957	0.00388413	251.899	291.133	299.187
AOE93344.1	ribosome-binding factor A [synthetic bacterium JCVI-Syn3.0]	41.0256	25	118	45000000000	3.84829e+09	3.93306e+09	3.84198e+09	3.84829e+09	5.76325e+09	6.23618e+09	4.83534e+09	5.76325e+09	5.53246e+09	5.3278e+09	5.68164e+09	5.53246e+09	0.00251809	0.00353354	0.0034364	193.964	272.182	264.699
AOE93345.1	tRNA pseudouridine(55) synthase TruB [synthetic bacterium JCVI-Syn3.0]	41.4384	7	293	830000000	1.00019e+08	1.06904e+08	1.09074e+08	1.06904e+08	1.09984e+08	1.29474e+08	1.28765e+08	1.28765e+08	4.63885e+07	4.94248e+07	4.9967e+07	4.94248e+07	6.99514e-05	7.8948e-05	3.06995e-05	5.38822	6.0812	2.36472
AOE93346.1	FAD synthetase [synthetic bacterium JCVI-Syn3.0]	60.8696	26	185	14000000000	1.36742e+09	1.29987e+09	1.3485e+09	1.3485e+09	1.68721e+09	1.64424e+09	1.80495e+09	1.68721e+09	1.59611e+09	1.59292e+09	1.65879e+09	1.59611e+09	0.000882382	0.00103445	0.000991399	67.9681	79.6819	76.3655
AOE93347.1	30S ribosomal protein S15 [synthetic bacterium JCVI-Syn3.0]	19.3182	9	89	22000000000	2.18979e+09	1.90213e+09	1.81601e+09	1.90213e+09	2.68171e+09	2.98505e+09	2.66716e+09	2.68171e+09	2.87104e+09	2.6398e+09	2.24732e+09	2.6398e+09	0.00124464	0.0016442	0.00163967	95.8721	126.649	126.301
AOE93348.1	hypothetical protein JCVSYN2_00735 [synthetic bacterium JCVI-Syn3.0]	22.8972	9	215	1900000000	1.9286e+08	1.86123e+08	2.12217e+08	1.9286e+08	2.3671e+08	2.4086e+08	2.08237e+08	2.3671e+08	2.16085e+08	1.91316e+08	2.15592e+08	2.15592e+08	0.000126196	0.000145131	0.000133912	9.72064	11.1791	10.3149
AOE93349.1	translation initiation factor IF-2 [synthetic bacterium JCVI-Syn3.0]	64.1935	151	621	73000000000	9.42917e+09	9.1218e+09	8.69926e+09	9.1218e+09	7.26372e+09	6.49245e+09	7.93106e+09	7.26372e+09	8.13475e+09	8.11715e+09	7.81064e+09	8.11715e+09	0.00596877	0.0044535	0.00504184	459.762	343.044	388.363
AOE93350.1	50S ribosomal protein L7 [synthetic bacterium JCVI-Syn3.0]	63.6364	17	100	1700000000	2.51649e+08	2.32655e+08	2.33889e+08	2.33889e+08	1.91425e+08	1.85424e+08	1.83625e+08	1.85424e+08	1.31532e+08	1.51924e+08	1.37877e+08	1.37877e+08	0.000153043	0.000113686	8.56405e-05	11.7886	8.75701	6.59671
AOE93351.1	transcription termination/antitermination protein NusA [synthetic bacterium JCVI-Syn3.0]	62.6712	128	585	70000000000	9.45611e+09	9.20454e+09	9.1161e+09	9.20454e+09	7.55975e+09	6.76777e+09	7.0199e+09	7.0199e+09	7.03931e+09	6.9168e+09	6.91972e+09	6.91972e+09	0.00602291	0.00430401	0.00429808	463.933	331.529	331.072
AOE93352.1	ribosome assembly cofactor RimP [synthetic bacterium JCVI-Syn3.0]	54.878	24	165	27000000000	2.76859e+09	2.89395e+09	2.7013e+09	2.76859e+09	3.31023e+09	3.46936e+09	2.75636e+09	3.31023e+09	3.0705e+09	2.99237e+09	3.03733e+09	3.03733e+09	0.0018116	0.00202956	0.00188659	139.544	156.333	145.321
AOE93353.1	NAD(P)H-dependent oxidoreductase [synthetic bacterium JCVI-Syn3.0]	52.7778	27	217	28000000000	3.18183e+09	3.16019e+09	3.18453e+09	3.18183e+09	3.03028e+09	3.24723e+09	3.09425e+09	3.09425e+09	2.92871e+09	2.96217e+09	3.21081e+09	2.96217e+09	0.002082	0.00189713	0.0018399	160.372	146.132	141.724
AOE93354.1	PolC-type DNA polymerase III [synthetic bacterium JCVI-Syn3.0]	45.614	100	1483	17000000000	2.27167e+09	2.02119e+09	2.0535e+09	2.0535e+09	2.07999e+09	2.18245e+09	1.92773e+09	2.07999e+09	1.49881e+09	1.48966e+09	1.475e+09	1.48966e+09	0.00134369	0.00127528	0.000925277	103.502	98.2321	71.2723
AOE93355.1	phosphatidate cytidylyltransferase [synthetic bacterium JCVI-Syn3.0]	7.60234	3	343	260000000	2.41777e+07	2.58066e+07	2.52222e+07	2.52222e+07	3.16965e+07	2.79976e+07	2.78445e+07	2.79976e+07	3.39498e+07	3.18025e+07	3.15025e+07	3.18025e+07	1.65039e-05	1.71657e-05	1.97536e-05	1.27127	1.32224	1.52158
AOE93356.1	Xaa-Pro dipeptidase [synthetic bacterium JCVI-Syn3.0]	73.743	159	359	87000000000	8.0219e+09	8.19592e+09	8.3429e+09	8.19592e+09	1.0415e+10	1.06552e+10	9.69658e+09	1.0415e+10	1.01846e+10	1.06768e+10	1.0811e+10	1.06768e+10	0.00536292	0.00638562	0.00663174	413.095	491.871	510.83
AOE93357.1	tryptophan--tRNA ligase [synthetic bacterium JCVI-Syn3.0]	43.75	33	337	5000000000	5.83346e+08	5.44162e+08	5.21295e+08	5.44162e+08	4.5856e+08	5.11581e+08	5.43829e+08	5.11581e+08	5.72536e+08	6.406e+08	6.24091e+08	6.24091e+08	0.000356068	0.000313658	0.000387645	27.4272	24.1605	29.8595
AOE93358.1	hypothetical protein JCVSYN2_00790 [synthetic bacterium JCVI-Syn3.0]	19.6721	10	245	26000000000	2.99673e+09	2.96833e+09	2.82979e+09	2.96833e+09	2.72235e+09	3.24638e+09	2.84648e+09	2.84648e+09	2.71924e+09	2.81208e+09	2.85861e+09	2.81208e+09	0.0019423	0.00174522	0.00174668	149.611	134.431	134.543
AOE93359.1	hypothetical protein JCVSYN2_00795 [synthetic bacterium JCVI-Syn3.0]	50	4	51	1800000000	1.26989e+08	1.24661e+08	1.01365e+08	1.24661e+08	4.73165e+08	3.18204e+08	1.25249e+08	3.18204e+08	1.67683e+08	1.74578e+08	1.88106e+08	1.74578e+08	8.15705e-05	0.000195096	0.000108437	6.28322	15.0278	8.35265
AOE93360.1	transketolase [synthetic bacterium JCVI-Syn3.0]	58.9939	99	657	28000000000	2.94339e+09	2.92999e+09	2.93665e+09	2.93665e+09	3.19435e+09	3.30511e+09	2.92339e+09	3.19435e+09	3.20627e+09	3.23586e+09	3.325e+09	3.23586e+09	0.00192157	0.00195851	0.0020099	148.015	150.86	154.819
AOE93361.1	hypothetical protein JCVSYN2_00805 [synthetic bacterium JCVI-Syn3.0]	19.7531	4	82	2100000000	3.86767e+08	4.33659e+08	3.22684e+08	3.86767e+08	6.93384e+07	2.7654e+07	3.02166e+08	6.93384e+07	2.50976e+08	2.05963e+08	1.00792e+08	2.05963e+08	0.000253077	4.25124e-05	0.000127931	19.4941	3.27465	9.85424
AOE93362.1	hypothetical protein JCVSYN2_00810 [synthetic bacterium JCVI-Syn3.0]	7.81563	5	500	1400000000	2.10846e+08	2.03105e+08	2.05944e+08	2.05944e+08	9.16766e+07	1.08931e+08	1.68209e+08	1.08931e+08	1.39878e+08	1.40482e+08	1.30928e+08	1.39878e+08	0.000134758	6.67874e-05	8.6883e-05	10.3801	5.1445	6.69243
AOE93363.1	hypothetical protein JCVSYN2_00815 [synthetic bacterium JCVI-Syn3.0]	22.5296	14	254	5600000000	7.1592e+08	6.88314e+08	6.68398e+08	6.88314e+08	5.42457e+08	5.90012e+08	6.20617e+08	5.90012e+08	5.8285e+08	6.01132e+08	5.90301e+08	5.90301e+08	0.000450392	0.000361745	0.000366656	34.6928	27.8645	28.2428
AOE93364.1	chromosome segregation protein ScpA [synthetic bacterium JCVI-Syn3.0]	14.7482	4	279	120000000	1.24837e+07	1.42811e+07	1.17836e+07	1.24837e+07	1.67735e+07	1.78894e+07	1.10505e+07	1.67735e+07	1.23734e+07	1.16159e+07	1.1749e+07	1.1749e+07	8.16858e-06	1.02841e-05	7.2977e-06	0.629209	0.792162	0.562127
AOE93365.1	SMC-Scp complex subunit ScpB [synthetic bacterium JCVI-Syn3.0]	55.5024	29	210	5400000000	6.12143e+08	6.0638e+08	5.75692e+08	6.0638e+08	6.02991e+08	6.61213e+08	5.9758e+08	6.02991e+08	5.88753e+08	5.64626e+08	5.90622e+08	5.88753e+08	0.00039678	0.000369703	0.000365695	30.5631	28.4775	28.1687
AOE93366.1	pseudouridine synthase [synthetic bacterium JCVI-Syn3.0]	48.4127	33	253	27000000000	2.14433e+09	2.18709e+09	2.16556e+09	2.16556e+09	3.42177e+09	3.70874e+09	3.26331e+09	3.42177e+09	3.31517e+09	3.35783e+09	3.4362e+09	3.35783e+09	0.00141702	0.00209794	0.00208567	109.15	161.6	160.655
AOE93367.1	deoxyguanosine kinase [synthetic bacterium JCVI-Syn3.0]	50.7317	34	206	13000000000	1.26973e+09	1.24938e+09	1.2329e+09	1.24938e+09	1.37157e+09	1.74876e+09	1.50321e+09	1.50321e+09	1.46634e+09	1.56863e+09	1.58949e+09	1.56863e+09	0.00081752	0.000921644	0.000974332	62.9719	70.9924	75.0508
AOE93368.1	hypothetical protein JCVSYN2_00840 [synthetic bacterium JCVI-Syn3.0]	18.1818	12	276	4600000000	6.22593e+08	6.11518e+08	6.40454e+08	6.22593e+08	2.391e+08	3.23444e+08	6.07573e+08	3.23444e+08	4.86304e+08	5.30011e+08	5.39002e+08	5.30011e+08	0.000407388	0.000198309	0.000329208	31.3803	15.2753	25.3583
AOE93369.1	lipoprotein [synthetic bacterium JCVI-Syn3.0]	51.046	66	240	23000000000	2.33809e+09	2.0616e+09	2.16915e+09	2.16915e+09	2.71912e+09	2.4342e+09	2.65747e+09	2.65747e+09	2.65501e+09	2.92088e+09	3.04448e+09	2.92088e+09	0.00141937	0.00162934	0.00181426	109.331	125.505	139.749
AOE93370.1	inorganic diphosphatase [synthetic bacterium JCVI-Syn3.0]	51.0753	70	187	33000000000	3.86151e+09	3.77407e+09	3.51343e+09	3.77407e+09	3.15595e+09	2.68484e+09	4.13269e+09	3.15595e+09	3.95694e+09	4.12713e+09	3.79344e+09	3.95694e+09	0.00246953	0.00193496	0.00245779	190.223	149.046	189.319
AOE93371.1	ECF transporter S component [synthetic bacterium JCVI-Syn3.0]	8.78378	3	297	1400000000	1.93893e+08	1.72015e+08	1.8903e+08	1.8903e+08	1.44211e+08	1.44958e+08	1.18185e+08	1.44211e+08	1.45486e+08	1.63243e+08	1.28978e+08	1.45486e+08	0.00012369	8.84179e-05	9.03666e-05	9.5276	6.81066	6.96075
AOE93372.1	hypothetical protein JCVSYN2_00860 [synthetic bacterium JCVI-Syn3.0]	53.2468	27	232	5600000000	6.8314e+08	6.80825e+08	6.79216e+08	6.80825e+08	6.31529e+08	6.39073e+08	5.9062e+08	6.31529e+08	5.73613e+08	5.57179e+08	5.64806e+08	5.64806e+08	0.000445492	0.0003872	0.000350821	34.3153	29.8252	27.023
AOE93373.1	cytidylate kinase [synthetic bacterium JCVI-Syn3.0]	34.5455	17	221	12000000000	1.31895e+09	1.31477e+09	1.35657e+09	1.31895e+09	1.26241e+09	1.42849e+09	1.2889e+09	1.2889e+09	1.25531e+09	1.41753e+09	1.35707e+09	1.35707e+09	0.000863044	0.000790243	0.000842926	66.4785	60.8708	64.9289
AOE93374.1	ribosome biogenesis GTPase Der [synthetic bacterium JCVI-Syn3.0]	36.5517	43	436	5700000000	6.67699e+08	6.84983e+08	6.62407e+08	6.67699e+08	5.6366e+08	5.61946e+08	6.76157e+08	5.6366e+08	6.51719e+08	6.63775e+08	5.67654e+08	6.51719e+08	0.000436903	0.000345589	0.000404805	33.6537	26.62	31.1814
AOE93375.1	DNA-binding protein [synthetic bacterium JCVI-Syn3.0]	44.4444	6	91	3700000000	5.63072e+08	4.84993e+08	5.48212e+08	5.48212e+08	4.1237e+08	3.7299e+08	4.83345e+08	4.1237e+08	3.04631e+08	2.56682e+08	2.73706e+08	2.73706e+08	0.000358718	0.00025283	0.000170009	27.6313	19.475	13.0954
AOE93376.1	hypothetical protein JCVSYN2_00880 [synthetic bacterium JCVI-Syn3.0]	39.5604	10	183	1900000000	2.238e+08	2.12063e+08	2.23306e+08	2.23306e+08	1.88453e+08	2.2028e+08	2.15068e+08	2.15068e+08	1.90124e+08	2.10115e+08	2.16792e+08	2.10115e+08	0.000146118	0.000131861	0.000130509	11.2552	10.157	10.0529
AOE93377.1	cell division protein DivIVA [synthetic bacterium JCVI-Syn3.0]	74.4	36	126	17000000000	1.2993e+09	1.4449e+09	1.36708e+09	1.36708e+09	1.90783e+09	2.07221e+09	1.58478e+09	1.90783e+09	2.47617e+09	2.38131e+09	2.46641e+09	2.46641e+09	0.000894538	0.00116972	0.00153197	68.9045	90.1014	118.005
AOE93378.1	ribonuclease Y [synthetic bacterium JCVI-Syn3.0]	57.9568	76	510	34000000000	4.09052e+09	4.13261e+09	4.05486e+09	4.09052e+09	3.61194e+09	3.46289e+09	3.56689e+09	3.56689e+09	3.739e+09	3.71716e+09	3.62413e+09	3.71716e+09	0.0026766	0.00218692	0.00230886	206.173	168.454	177.847
AOE93379.1	signal recognition particle protein [synthetic bacterium JCVI-Syn3.0]	60.8501	126	448	60000000000	7.23718e+09	7.00243e+09	7.29346e+09	7.23718e+09	7.33291e+09	6.64573e+09	6.6668e+09	6.6668e+09	5.7923e+09	6.03768e+09	5.99152e+09	5.99152e+09	0.00473558	0.00408752	0.00372154	364.772	314.853	286.663
AOE93380.1	50S rRNA methyltransferase [synthetic bacterium JCVI-Syn3.0]	62.5806	26	156	20000000000	2.37057e+09	2.43415e+09	2.49023e+09	2.43415e+09	2.16244e+09	2.38908e+09	2.09351e+09	2.16244e+09	1.98551e+09	2.05746e+09	2.01705e+09	2.01705e+09	0.00159277	0.00132582	0.00125286	122.688	102.126	96.5051
AOE93381.1	30S ribosomal protein S16 [synthetic bacterium JCVI-Syn3.0]	43.4783	22	93	47000000000	4.68066e+09	4.46829e+09	4.35521e+09	4.46829e+09	5.74767e+09	5.67459e+09	5.09749e+09	5.67459e+09	5.50061e+09	5.61303e+09	5.86244e+09	5.61303e+09	0.00292378	0.00347918	0.00348645	225.213	267.994	268.554
AOE93382.1	16S rRNA processing protein RimM [synthetic bacterium JCVI-Syn3.0]	48.1707	11	165	940000000	1.06063e+08	1.06719e+08	1.03931e+08	1.06063e+08	8.08056e+07	8.55973e+07	1.20587e+08	8.55973e+07	1.0831e+08	1.22048e+08	1.05938e+08	1.0831e+08	6.94014e-05	5.2481e-05	6.7275e-05	5.34585	4.04251	5.18206
AOE93383.1	tRNA (guanosine(37)-N1)-methyltransferase TrmD [synthetic bacterium JCVI-Syn3.0]	52.5	17	241	5800000000	4.99464e+08	4.88083e+08	5.01234e+08	4.99464e+08	7.61786e+08	7.19157e+08	6.56572e+08	7.19157e+08	7.44033e+08	7.00265e+08	7.29406e+08	7.29406e+08	0.00032682	0.000440927	0.000453059	25.1743	33.9637	34.8983
AOE93384.1	50S ribosomal protein L19 [synthetic bacterium JCVI-Syn3.0]	60.6299	57	128	40000000000	3.96376e+09	4.04107e+09	4.06645e+09	4.04107e+09	5.10606e+09	4.77107e+09	4.09177e+09	4.77107e+09	4.70023e+09	4.49625e+09	4.76335e+09	4.70023e+09	0.00264424	0.00292522	0.00291947	203.68	225.324	224.881
AOE93385.1	ribosome biogenesis GTPase YlqF [synthetic bacterium JCVI-Syn3.0]	33.5443	32	317	29000000000	2.96305e+09	2.87287e+09	2.89926e+09	2.89926e+09	3.43258e+09	3.69933e+09	3.1938e+09	3.43258e+09	3.27109e+09	3.27512e+09	3.3929e+09	3.27512e+09	0.00189711	0.00210457	0.00203429	146.13	162.111	156.697
AOE93386.1	ABC transporter ATP-binding protein [synthetic bacterium JCVI-Syn3.0]	41.4125	55	624	27000000000	3.68075e+09	3.41916e+09	3.476e+09	3.476e+09	2.51341e+09	2.67115e+09	2.66675e+09	2.66675e+09	2.78078e+09	2.80861e+09	2.98338e+09	2.80861e+09	0.00227449	0.00163502	0.00174452	175.199	125.943	134.377
AOE93387.1	ABC transporter ATP-binding protein [synthetic bacterium JCVI-Syn3.0]	37.2771	55	618	10000000000	1.27468e+09	1.28651e+09	1.2847e+09	1.2847e+09	9.40459e+08	1.03233e+09	9.66403e+08	9.66403e+08	1.04232e+09	1.08314e+09	1.08948e+09	1.08314e+09	0.00084063	0.000592517	0.000672773	64.752	45.6404	51.8224
AOE93388.1	hypothetical protein JCVSYN2_00945 [synthetic bacterium JCVI-Syn3.0]	36.2617	27	536	8000000000	9.5451e+08	9.85725e+08	9.49225e+08	9.5451e+08	7.86225e+08	9.04712e+08	8.90669e+08	8.90669e+08	8.35234e+08	8.6367e+08	8.3003e+08	8.35234e+08	0.000624575	0.000546083	0.000518793	48.1098	42.0637	39.9616
AOE93389.1	hypothetical protein JCVSYN2_00955 [synthetic bacterium JCVI-Syn3.0]	35.3659	18	247	8900000000	1.04776e+09	1.04919e+09	1.05538e+09	1.04919e+09	8.79697e+08	9.89748e+08	1.10556e+09	9.89748e+08	9.20509e+08	9.36533e+08	9.15622e+08	9.20509e+08	0.000686525	0.00060683	0.00057176	52.8817	46.7429	44.0415
AOE93390.1	hypothetical protein JCVSYN2_00960 [synthetic bacterium JCVI-Syn3.0]	31.5789	3	115	1400000000	1.56548e+08	1.56401e+08	1.42182e+08	1.56401e+08	1.38841e+08	1.71635e+08	1.51473e+08	1.51473e+08	1.59932e+08	1.55975e+08	1.67012e+08	1.59932e+08	0.00010234	9.28706e-05	9.93393e-05	7.88301	7.15364	7.65191
AOE93391.1	GTPase ObgE [synthetic bacterium JCVI-Syn3.0]	60.2771	97	434	30000000000	2.98589e+09	3.03214e+09	2.95241e+09	2.98589e+09	3.75383e+09	3.7732e+09	3.31622e+09	3.75383e+09	3.32003e+09	3.3685e+09	3.49778e+09	3.3685e+09	0.00195379	0.00230153	0.00209229	150.497	177.282	161.165
AOE93392.1	NAD(+) synthase [synthetic bacterium JCVI-Syn3.0]	53.8776	50	246	49000000000	5.04604e+09	4.97587e+09	4.76557e+09	4.97587e+09	5.26087e+09	5.55531e+09	5.43869e+09	5.43869e+09	5.79682e+09	6.04243e+09	6.1184e+09	6.04243e+09	0.00325591	0.00333455	0.00375316	250.797	256.853	289.099
AOE93394.1	nicotinate (nicotinamide) nucleotide adenylyltransferase [synthetic bacterium JCVI-Syn3.0]	43.0137	28	366	15000000000	1.26485e+09	1.34632e+09	1.29885e+09	1.29885e+09	1.77541e+09	1.81646e+09	1.78972e+09	1.78972e+09	1.90844e+09	1.97866e+09	1.82129e+09	1.90844e+09	0.000849893	0.00109731	0.0011854	65.4656	84.5234	91.3087
AOE93395.1	5'-methylthioadenosine nucleosidase [synthetic bacterium JCVI-Syn3.0]	21.0046	8	220	2900000000	2.97603e+08	3.05851e+08	3.06235e+08	3.05851e+08	2.76076e+08	2.95467e+08	3.62958e+08	2.95467e+08	3.34165e+08	3.4847e+08	3.73174e+08	3.4847e+08	0.000200131	0.000181156	0.000216447	15.4157	13.954	16.6725
AOE93396.1	deoxynucleoside kinase [synthetic bacterium JCVI-Syn3.0]	38.6792	11	213	4400000000	4.45879e+08	4.92556e+08	4.47238e+08	4.47238e+08	4.66795e+08	3.80235e+08	6.12037e+08	4.66795e+08	5.6327e+08	5.43349e+08	4.4864e+08	5.43349e+08	0.000292646	0.0002862	0.000337493	22.542	22.0454	25.9964
AOE93397.1	tRNA 2-thiouridine(34) synthase MnmA [synthetic bacterium JCVI-Syn3.0]	50.6667	28	376	14000000000	1.38816e+09	1.42355e+09	1.47758e+09	1.42355e+09	1.71082e+09	1.79647e+09	1.46248e+09	1.71082e+09	1.56298e+09	1.52474e+09	1.65323e+09	1.56298e+09	0.000931487	0.00104893	0.00097082	71.7506	80.797	74.7803
AOE93398.1	hypothetical protein JCVSYN2_01000 [synthetic bacterium JCVI-Syn3.0]	26.3415	10	206	15000000000	1.70821e+09	1.80871e+09	1.68916e+09	1.70821e+09	2.0766e+09	2.0742e+09	1.57717e+09	2.0742e+09	1.53748e+09	1.38719e+09	1.14128e+09	1.38719e+09	0.00111775	0.00127172	0.000861633	86.0982	97.9582	66.3698
AOE93399.1	hypothetical protein JCVSYN2_01005 [synthetic bacterium JCVI-Syn3.0]	54.4818	73	715	15000000000	1.47571e+09	1.44677e+09	1.4705e+09	1.4705e+09	1.61066e+09	1.70333e+09	1.73895e+09	1.70333e+09	1.83437e+09	1.84018e+09	1.87953e+09	1.84018e+09	0.000962208	0.00104434	0.001143	74.117	80.4432	88.0429
AOE93400.1	methionyl-tRNA formyltransferase [synthetic bacterium JCVI-Syn3.0]	52.9968	64	318	23000000000	2.53762e+09	2.59192e+09	2.50587e+09	2.53762e+09	2.50071e+09	2.58503e+09	2.56697e+09	2.56697e+09	2.53664e+09	2.64203e+09	2.53321e+09	2.53664e+09	0.00166047	0.00157385	0.0015756	127.903	121.23	121.365
AOE93401.1	elongation factor P [synthetic bacterium JCVI-Syn3.0]	40.7609	22	185	19000000000	2.31485e+09	2.23379e+09	2.28312e+09	2.28312e+09	2.245e+09	1.99103e+09	2.1234e+09	2.1234e+09	1.91315e+09	1.92337e+09	1.97229e+09	1.92337e+09	0.00149394	0.00130189	0.00119467	115.075	100.282	92.0233
AOE93402.1	hypothetical protein JCVSYN2_01020 [synthetic bacterium JCVI-Syn3.0]	73	34	101	17000000000	1.93663e+09	1.9103e+09	1.94738e+09	1.93663e+09	1.75282e+09	1.83391e+09	1.80923e+09	1.80923e+09	1.89517e+09	1.97679e+09	1.93776e+09	1.93776e+09	0.00126722	0.00110927	0.00120361	97.6113	85.4448	92.7116
AOE93403.1	endopeptidase La [synthetic bacterium JCVI-Syn3.0]	53.944	216	787	100000000000	1.50131e+10	1.48606e+10	1.51401e+10	1.50131e+10	1.06635e+10	9.79493e+09	7.64328e+09	9.79493e+09	9.13275e+09	8.59271e+09	9.15902e+09	9.13275e+09	0.00982366	0.00600543	0.00567267	756.697	462.586	436.954
AOE93405.1	ABC transporter permease [synthetic bacterium JCVI-Syn3.0]	45.2367	128	1754	9600000000	1.17131e+09	1.18878e+09	1.15352e+09	1.17131e+09	9.43037e+08	9.94432e+08	1.10078e+09	9.94432e+08	1.02239e+09	9.94811e+08	1.03093e+09	1.02239e+09	0.000766438	0.000609702	0.000635042	59.0372	46.9641	48.916
AOE93406.1	protease [synthetic bacterium JCVI-Syn3.0]	30.0546	22	184	7300000000	7.88143e+08	7.84056e+08	8.27415e+08	7.88143e+08	7.55449e+08	9.18601e+08	7.55409e+08	7.55449e+08	7.12429e+08	9.45517e+08	8.12982e+08	8.12982e+08	0.000515714	0.000463177	0.000504971	39.7244	35.6776	38.8969
AOE93408.1	rRNA maturation RNase YbeY [synthetic bacterium JCVI-Syn3.0]	38.4146	22	165	12000000000	1.28865e+09	1.27949e+09	1.27363e+09	1.27949e+09	1.26927e+09	1.42891e+09	1.23778e+09	1.26927e+09	1.33572e+09	1.39401e+09	1.49254e+09	1.39401e+09	0.000837226	0.000778209	0.000865867	64.4898	59.9439	66.696
AOE93409.1	GTPase Era [synthetic bacterium JCVI-Syn3.0]	30.2326	10	302	9200000000	9.25195e+08	9.10795e+08	9.12834e+08	9.12834e+08	1.17249e+09	1.14444e+09	1.08101e+09	1.14444e+09	1.0485e+09	1.01282e+09	9.91916e+08	1.01282e+09	0.000597305	0.000701673	0.000629095	46.0092	54.0484	48.4579
AOE93410.1	DNA repair protein RecO [synthetic bacterium JCVI-Syn3.0]	12.4498	2	250	1200000000	1.63974e+08	1.71098e+08	2.04411e+08	1.71098e+08	9.35596e+07	1.17129e+08	1.47103e+08	1.17129e+08	9.34216e+07	1.13108e+08	9.61951e+07	9.61951e+07	0.000111957	7.18139e-05	5.97501e-05	8.62379	5.53168	4.60243
AOE93411.1	glycine--tRNA ligase [synthetic bacterium JCVI-Syn3.0]	53.5088	57	457	22000000000	2.058e+09	2.0718e+09	2.06031e+09	2.06031e+09	2.78404e+09	2.823e+09	2.50456e+09	2.78404e+09	2.55537e+09	2.6435e+09	2.49941e+09	2.55537e+09	0.00134815	0.00170694	0.00158723	103.845	131.482	122.261
AOE93412.1	DNA primase [synthetic bacterium JCVI-Syn3.0]	59.8039	65	613	12000000000	1.14501e+09	1.18654e+09	1.21504e+09	1.18654e+09	1.51559e+09	1.36063e+09	1.41713e+09	1.41713e+09	1.42506e+09	1.38167e+09	1.35333e+09	1.38167e+09	0.000776402	0.000868864	0.000858204	59.8047	66.9268	66.1057
AOE93413.1	RNA polymerase subunit sigma [synthetic bacterium JCVI-Syn3.0]	47.6285	87	507	42000000000	4.50707e+09	4.74411e+09	4.47262e+09	4.50707e+09	5.19191e+09	4.14879e+09	5.47795e+09	5.19191e+09	4.73264e+09	4.64411e+09	4.0808e+09	4.64411e+09	0.00294916	0.00318324	0.00288462	227.168	245.199	222.197
AOE93414.1	hypothetical protein JCVSYN2_01080 [synthetic bacterium JCVI-Syn3.0]	40.8889	11	226	3200000000	3.74116e+08	3.66329e+08	3.72431e+08	3.72431e+08	3.10727e+08	3.97045e+08	3.26277e+08	3.26277e+08	3.14798e+08	3.65606e+08	3.72672e+08	3.65606e+08	0.000243697	0.000200045	0.00022709	18.7715	15.4091	17.4923
AOE93415.1	dinuclear metal center protein, YbgI family [synthetic bacterium JCVI-Syn3.0]	43.7984	24	259	15000000000	1.74973e+09	1.75473e+09	1.82543e+09	1.75473e+09	1.59091e+09	1.60323e+09	1.5605e+09	1.59091e+09	1.61441e+09	1.61083e+09	1.69024e+09	1.61441e+09	0.00114819	0.000975409	0.00100277	88.4428	75.1338	77.2412
AOE93416.1	helicase [synthetic bacterium JCVI-Syn3.0]	55.8499	64	454	20000000000	2.38193e+09	2.38332e+09	2.25123e+09	2.38193e+09	2.07913e+09	2.17419e+09	2.21426e+09	2.17419e+09	2.21382e+09	2.24304e+09	2.0591e+09	2.21382e+09	0.00155859	0.00133303	0.00137508	120.055	102.681	105.919
AOE93417.1	hypothetical protein JCVSYN2_01095 [synthetic bacterium JCVI-Syn3.0]	24.6032	18	505	13000000000	1.64849e+09	1.68805e+09	1.60911e+09	1.64849e+09	1.31931e+09	1.31125e+09	1.39421e+09	1.31931e+09	1.36779e+09	1.3632e+09	1.29859e+09	1.3632e+09	0.00107867	0.000808892	0.00084673	83.088	62.3073	65.2219
AOE93418.1	hypothetical protein JCVSYN2_01100 [synthetic bacterium JCVI-Syn3.0]	44.4364	196	1385	35000000000	4.26672e+09	4.34739e+09	4.20202e+09	4.26672e+09	3.67611e+09	3.51409e+09	3.71803e+09	3.67611e+09	3.87725e+09	3.69783e+09	3.70059e+09	3.70059e+09	0.00279189	0.00225388	0.00229856	215.054	173.612	177.054
AOE93419.1	adenine phosphoribosyltransferase [synthetic bacterium JCVI-Syn3.0]	68.2353	48	171	62000000000	7.20202e+09	6.93371e+09	7.50953e+09	7.20202e+09	8.27325e+09	7.90131e+09	6.51473e+09	7.90131e+09	5.99526e+09	5.90148e+09	5.76872e+09	5.90148e+09	0.00471258	0.00484441	0.00366562	363	373.156	282.355
AOE93420.1	guanosine-3',5'-bis(diphosphate) 3'-pyrophosphohydrolase [synthetic bacterium JCVI-Syn3.0]	52.9178	96	755	25000000000	2.38813e+09	2.44034e+09	2.42768e+09	2.42768e+09	2.82784e+09	2.87433e+09	2.86698e+09	2.86698e+09	3.06639e+09	3.02634e+09	3.08197e+09	3.06639e+09	0.00158853	0.00175779	0.00190464	122.361	135.399	146.711
AOE93421.1	oxidoreductase [synthetic bacterium JCVI-Syn3.0]	58.8057	133	989	41000000000	4.00613e+09	4.07697e+09	3.98104e+09	4.00613e+09	4.77089e+09	4.74482e+09	4.7676e+09	4.7676e+09	5.18481e+09	4.74656e+09	4.72118e+09	4.74656e+09	0.00262138	0.00292309	0.00294825	201.92	225.16	227.098
AOE93422.1	hypothetical protein JCVSYN2_01120 [synthetic bacterium JCVI-Syn3.0]	6.97674	1	130	29000000	3.22306e+06	3.39779e+06	3.8416e+06	3.39779e+06	2.77375e+06	2.98876e+06	3.23982e+06	2.98876e+06	3.36636e+06	3.20804e+06	2.96082e+06	3.20804e+06	2.22332e-06	1.83245e-06	1.99262e-06	0.171258	0.14115	0.153488
AOE93423.1	ribonuclease III [synthetic bacterium JCVI-Syn3.0]	46.1207	38	233	9400000000	1.11372e+09	1.18122e+09	1.1772e+09	1.1772e+09	1.00297e+09	1.01248e+09	1.04471e+09	1.01248e+09	9.66571e+08	9.90086e+08	9.11046e+08	9.66571e+08	0.000770293	0.000620767	0.000600371	59.3341	47.8164	46.2454
AOE93424.1	phosphate acyltransferase [synthetic bacterium JCVI-Syn3.0]	55.3892	59	335	26000000000	2.78044e+09	2.87465e+09	2.70342e+09	2.78044e+09	2.94876e+09	2.94334e+09	2.70639e+09	2.94334e+09	2.97818e+09	3.05189e+09	3.01293e+09	3.01293e+09	0.00181936	0.00180461	0.00187144	140.141	139.005	144.153
AOE93425.1	dihydroxyacetone kinase [synthetic bacterium JCVI-Syn3.0]	53.3821	92	548	35000000000	4.1129e+09	4.06486e+09	3.99468e+09	4.06486e+09	3.79162e+09	3.66676e+09	3.80463e+09	3.79162e+09	3.86602e+09	3.84813e+09	3.8504e+09	3.8504e+09	0.0026598	0.0023247	0.00239162	204.879	179.067	184.221
AOE93426.1	hypothetical protein JCVSYN2_01140 [synthetic bacterium JCVI-Syn3.0]	56.3107	16	104	13000000000	1.56943e+09	1.64087e+09	1.60821e+09	1.60821e+09	1.44431e+09	1.20296e+09	1.44713e+09	1.44431e+09	1.40149e+09	1.41309e+09	1.27251e+09	1.40149e+09	0.00105232	0.000885529	0.000870511	81.0581	68.2106	67.0537
AOE93427.1	50S ribosomal protein L28 [synthetic bacterium JCVI-Syn3.0]	35.3846	24	66	21000000000	2.21203e+09	2.34256e+09	2.42006e+09	2.34256e+09	2.44934e+09	3.08592e+09	2.2683e+09	2.44934e+09	2.0735e+09	2.06536e+09	2.08294e+09	2.0735e+09	0.00153283	0.00150173	0.00128793	118.071	115.675	99.2063
AOE93428.1	hypothetical protein JCVSYN2_01155 [synthetic bacterium JCVI-Syn3.0]	29.2517	7	148	1300000000	1.25681e+08	1.36995e+08	1.34353e+08	1.34353e+08	1.23549e+08	1.57666e+08	1.49496e+08	1.49496e+08	1.56082e+08	1.64052e+08	1.52127e+08	1.56082e+08	8.79127e-05	9.16582e-05	9.69479e-05	6.77174	7.06025	7.46771
AOE93429.1	phosphate ABC transporter substrate-binding protein [synthetic bacterium JCVI-Syn3.0]	47.0745	28	377	8800000000	1.1104e+09	1.11225e+09	1.0252e+09	1.1104e+09	8.87257e+08	8.35561e+08	1.10343e+09	8.87257e+08	9.78049e+08	9.09429e+08	8.38415e+08	9.09429e+08	0.000726583	0.000543991	0.000564878	55.9673	41.9025	43.5114
AOE93430.1	phosphate ABC transporter permease [synthetic bacterium JCVI-Syn3.0]	12.7874	13	697	4200000000	5.18217e+08	5.04649e+08	5.92681e+08	5.18217e+08	3.93266e+08	4.17958e+08	4.76111e+08	4.17958e+08	4.24636e+08	4.44751e+08	4.27731e+08	4.27731e+08	0.000339091	0.000256256	0.000265678	26.1195	19.7389	20.4647
AOE93431.1	phosphate ABC transporter ATP-binding protein [synthetic bacterium JCVI-Syn3.0]	65.7993	47	270	22000000000	2.46831e+09	2.43669e+09	2.37523e+09	2.43669e+09	2.3843e+09	2.68703e+09	2.29217e+09	2.3843e+09	2.37844e+09	2.30524e+09	2.67259e+09	2.37844e+09	0.00159443	0.00146185	0.00147733	122.815	112.604	113.796
AOE93432.1	phosphate transport system regulatory protein PhoU [synthetic bacterium JCVI-Syn3.0]	52.6786	44	225	26000000000	2.51783e+09	2.63424e+09	2.63892e+09	2.63424e+09	3.06254e+09	3.34461e+09	2.83961e+09	3.06254e+09	2.9035e+09	3.01954e+09	3.03921e+09	3.01954e+09	0.00172369	0.00187769	0.00187554	132.772	144.635	144.469
AOE93433.1	signal recognition particle-docking protein FtsY [synthetic bacterium JCVI-Syn3.0]	44.0098	54	410	18000000000	1.68871e+09	1.74686e+09	1.75927e+09	1.74686e+09	2.35513e+09	2.15355e+09	1.95569e+09	2.15355e+09	2.14708e+09	2.06309e+09	2.13063e+09	2.13063e+09	0.00114304	0.00132037	0.00132341	88.0462	101.706	101.939
AOE93434.1	DNA-binding protein [synthetic bacterium JCVI-Syn3.0]	33.6283	7	114	7300000000	9.18299e+08	8.0706e+08	8.11812e+08	8.11812e+08	7.43624e+08	6.69411e+08	8.45856e+08	7.43624e+08	7.69253e+08	8.69542e+08	8.65142e+08	8.65142e+08	0.000531202	0.000455928	0.00053737	40.9174	35.1192	41.3925
AOE93435.1	metallophosphoesterase [synthetic bacterium JCVI-Syn3.0]	42.8016	20	258	6500000000	7.06767e+08	6.91281e+08	7.04377e+08	7.04377e+08	7.12484e+08	6.73854e+08	7.63791e+08	7.12484e+08	7.65608e+08	7.72592e+08	7.09246e+08	7.65608e+08	0.000460903	0.000436835	0.000475546	35.5024	33.6485	36.6303
AOE93436.1	methionine adenosyltransferase [synthetic bacterium JCVI-Syn3.0]	58.6563	32	388	10000000000	1.10949e+09	1.12859e+09	1.10325e+09	1.10949e+09	1.23158e+09	1.16396e+09	1.03366e+09	1.16396e+09	1.05011e+09	1.07555e+09	1.10381e+09	1.07555e+09	0.000725985	0.000713641	0.00066806	55.9212	54.9703	51.4593
AOE93437.1	copper homeostasis protein CutC [synthetic bacterium JCVI-Syn3.0]	55.5066	13	228	5500000000	6.10186e+08	5.65496e+08	5.96848e+08	5.96848e+08	6.27302e+08	5.97299e+08	6.51843e+08	6.27302e+08	5.85875e+08	6.04842e+08	6.60311e+08	6.04842e+08	0.000390542	0.000384608	0.000375688	30.0827	29.6256	28.9385
AOE93438.1	methylenetetrahydrofolate--tRNA-(uracil(54)-C(5))-methyltransferase (FADH(2)-oxidizing) TrmFO [synthetic bacterium JCVI-Syn3.0]	42.4658	34	439	13000000000	1.39615e+09	1.43258e+09	1.39849e+09	1.39849e+09	1.38387e+09	1.53865e+09	1.36651e+09	1.38387e+09	1.47657e+09	1.48203e+09	1.52515e+09	1.48203e+09	0.000915088	0.000848472	0.000920542	70.4874	65.3561	70.9075
AOE93439.1	mannose-6-phosphate isomerase [synthetic bacterium JCVI-Syn3.0]	31.068	17	310	7500000000	8.01681e+08	8.65311e+08	1.0322e+09	8.65311e+08	8.56973e+08	8.85234e+08	8.25242e+08	8.56973e+08	7.62911e+08	7.4818e+08	7.22266e+08	7.4818e+08	0.000566209	0.000525423	0.00046472	43.6139	40.4723	35.7965
AOE93440.1	CMP-binding protein [synthetic bacterium JCVI-Syn3.0]	53.9877	102	327	110000000000	1.02648e+10	1.02238e+10	1.03078e+10	1.02648e+10	1.37414e+10	1.33806e+10	1.24958e+10	1.33806e+10	1.34809e+10	1.29791e+10	1.31258e+10	1.31258e+10	0.00671669	0.00820389	0.00815287	517.373	631.929	627.999
AOE93441.1	hypothetical protein JCVSYN2_01220 [synthetic bacterium JCVI-Syn3.0]	46.2121	26	133	34000000000	3.91134e+09	3.91609e+09	4.02433e+09	3.91609e+09	3.93652e+09	4.05694e+09	3.36289e+09	3.93652e+09	3.49476e+09	3.57212e+09	3.72501e+09	3.57212e+09	0.00256246	0.00241354	0.00221877	197.381	185.911	170.907
AOE93442.1	lipoprotein [synthetic bacterium JCVI-Syn3.0]	66.4345	156	719	61000000000	7.41932e+09	7.57757e+09	7.24324e+09	7.41932e+09	6.33886e+09	6.57348e+09	6.06212e+09	6.33886e+09	6.65344e+09	6.59658e+09	6.53539e+09	6.59658e+09	0.00485477	0.00388645	0.00409737	373.953	299.366	315.612
AOE93443.1	hypothetical protein JCVSYN2_01230 [synthetic bacterium JCVI-Syn3.0]	65.6442	233	979	68000000000	8.09604e+09	8.14994e+09	8.08597e+09	8.09604e+09	7.75064e+09	7.46548e+09	6.88518e+09	7.46548e+09	7.33856e+09	7.08882e+09	7.13938e+09	7.13938e+09	0.00529757	0.0045772	0.00443451	408.061	352.573	341.582
AOE93444.1	aminotransferase [synthetic bacterium JCVI-Syn3.0]	49.5146	27	413	8700000000	1.06502e+09	1.01928e+09	9.83821e+08	1.01928e+09	7.6911e+08	7.93661e+08	9.15769e+08	7.93661e+08	1.00042e+09	1.07284e+09	1.08008e+09	1.07284e+09	0.000666954	0.000486606	0.000666378	51.3742	37.4823	51.3298
AOE93445.1	iron-sulfur cluster assembly scaffold protein [synthetic bacterium JCVI-Syn3.0]	13.1034	3	146	3700000000	3.98944e+08	3.67366e+08	3.74812e+08	3.74812e+08	3.56085e+08	5.06276e+08	4.31949e+08	4.31949e+08	4.13258e+08	4.38948e+08	4.12363e+08	4.13258e+08	0.000245255	0.000264835	0.000256689	18.8915	20.3997	19.7722
AOE93446.1	5-formyltetrahydrofolate cyclo-ligase [synthetic bacterium JCVI-Syn3.0]	50.8021	15	188	6000000000	7.55331e+08	7.45736e+08	7.3208e+08	7.45736e+08	5.46975e+08	6.67378e+08	7.30045e+08	6.67378e+08	5.55638e+08	6.15157e+08	6.51661e+08	6.15157e+08	0.000487965	0.00040918	0.000382095	37.587	31.5183	29.432
AOE93447.1	peptidase M13 [synthetic bacterium JCVI-Syn3.0]	51.5055	103	632	41000000000	5.12053e+09	4.65574e+09	4.67005e+09	4.67005e+09	4.39178e+09	4.36386e+09	4.23354e+09	4.36386e+09	4.39659e+09	4.48074e+09	4.68717e+09	4.48074e+09	0.0030558	0.00267555	0.00278314	235.382	206.092	214.38
AOE93448.1	glucose-6-phosphate isomerase [synthetic bacterium JCVI-Syn3.0]	55.0351	71	428	49000000000	5.27032e+09	5.34134e+09	4.98528e+09	5.27032e+09	5.84799e+09	5.51075e+09	5.20859e+09	5.51075e+09	5.81193e+09	5.56675e+09	5.45707e+09	5.56675e+09	0.00344859	0.00337872	0.0034577	265.638	260.256	266.34
AOE93449.1	dUTP diphosphatase [synthetic bacterium JCVI-Syn3.0]	14.9701	7	168	1800000000	2.03987e+08	2.2106e+08	1.9862e+08	2.03987e+08	2.16382e+08	2.26572e+08	1.83828e+08	2.16382e+08	1.69106e+08	1.97781e+08	1.82663e+08	1.82663e+08	0.000133477	0.000132667	0.000113459	10.2815	10.2191	8.73948
AOE93450.1	rRNA methyltransferase [synthetic bacterium JCVI-Syn3.0]	29.0196	41	256	57000000000	6.29871e+09	7.18746e+09	6.20631e+09	6.29871e+09	6.26212e+09	5.30343e+09	6.991e+09	6.26212e+09	6.7293e+09	6.63577e+09	5.3859e+09	6.63577e+09	0.0041215	0.0038394	0.00412171	317.471	295.742	317.487
AOE93451.1	glyceraldehyde-3-phosphate dehydrogenase [synthetic bacterium JCVI-Syn3.0]	72.6115	129	472	58000000000	4.81718e+09	4.95806e+09	4.91345e+09	4.91345e+09	7.23149e+09	7.74123e+09	6.77965e+09	7.23149e+09	7.02608e+09	7.22081e+09	7.31207e+09	7.22081e+09	0.00321507	0.00443374	0.00448509	247.65	341.522	345.478
AOE93452.1	DNA topoisomerase IV subunit B [synthetic bacterium JCVI-Syn3.0]	56.9207	101	644	30000000000	3.11195e+09	3.10363e+09	3.14367e+09	3.11195e+09	3.63152e+09	3.70874e+09	3.32107e+09	3.63152e+09	3.35586e+09	3.14402e+09	3.47955e+09	3.35586e+09	0.00203628	0.00222654	0.00208444	156.85	171.506	160.56
AOE93453.1	DNA topoisomerase IV subunit A [synthetic bacterium JCVI-Syn3.0]	54.7884	90	899	28000000000	3.02015e+09	3.08922e+09	3.10282e+09	3.08922e+09	2.90486e+09	3.03878e+09	3.03702e+09	3.03702e+09	3.29547e+09	3.22659e+09	3.28508e+09	3.28508e+09	0.00202141	0.00186205	0.00204048	155.705	143.43	157.174
AOE93454.1	L-lactate dehydrogenase [synthetic bacterium JCVI-Syn3.0]	64.7799	448	319	220000000000	2.18688e+10	2.1505e+10	2.18338e+10	2.18338e+10	2.49191e+10	2.36277e+10	2.49834e+10	2.49191e+10	2.57378e+10	2.78471e+10	2.76772e+10	2.76772e+10	0.0142868	0.0152783	0.0171913	1100.48	1176.85	1324.21
AOE93455.1	hypothetical protein JCVSYN2_01290 [synthetic bacterium JCVI-Syn3.0]	8.76289	5	195	770000000	1.44342e+08	1.67943e+08	1.61738e+08	1.61738e+08	2.47383e+07	1.33226e+07	1.07702e+08	2.47383e+07	6.22652e+07	5.68676e+07	3.10806e+07	5.68676e+07	0.000105832	1.51675e-05	3.53224e-05	8.15201	1.16832	2.72082
AOE93456.1	hypothetical protein JCVSYN2_01295 [synthetic bacterium JCVI-Syn3.0]	47.6277	48	549	11000000000	1.31823e+09	1.30697e+09	1.25222e+09	1.30697e+09	1.28186e+09	1.4016e+09	1.14534e+09	1.28186e+09	1.14683e+09	1.02767e+09	1.11929e+09	1.11929e+09	0.000855207	0.000785927	0.00069523	65.8749	60.5384	53.5522
AOE93457.1	hypothetical protein JCVSYN2_01300 [synthetic bacterium JCVI-Syn3.0]	11.0345	1	146	1000000000	1.58952e+08	1.65596e+08	1.74062e+08	1.65596e+08	7.36627e+07	5.59229e+07	1.13495e+08	7.36627e+07	9.40898e+07	9.29442e+07	7.1275e+07	9.29442e+07	0.000108356	4.51638e-05	5.77309e-05	8.34647	3.47887	4.44689
AOE93458.1	30S ribosomal protein S21 [synthetic bacterium JCVI-Syn3.0]	37.037	2	55	66000000	5.1505e+06	9.17688e+06	1.11147e+07	9.17688e+06	1.08458e+07	4.89274e+06	7.54757e+06	7.54757e+06	8.39746e+06	4.21752e+06	4.65676e+06	4.65676e+06	6.00481e-06	4.62753e-06	2.89247e-06	0.462538	0.356449	0.222801
AOE93459.1	peptidase M17 [synthetic bacterium JCVI-Syn3.0]	64.9667	293	452	130000000000	1.10119e+10	1.14389e+10	1.1362e+10	1.1362e+10	1.64033e+10	1.60799e+10	1.49999e+10	1.60799e+10	1.63291e+10	1.60663e+10	1.63087e+10	1.63087e+10	0.00743465	0.00985885	0.0101299	572.676	759.407	780.288
AOE93460.1	peptidase M20 [synthetic bacterium JCVI-Syn3.0]	56.7929	88	450	16000000000	1.52917e+09	1.53888e+09	1.57708e+09	1.53888e+09	2.1226e+09	2.04977e+09	1.62059e+09	2.04977e+09	1.8843e+09	1.79961e+09	1.878e+09	1.878e+09	0.00100695	0.00125675	0.00116649	77.5635	96.8046	89.8523
AOE93461.1	N-acetylmannosamine-6-phosphate 2-epimerase [synthetic bacterium JCVI-Syn3.0]	76.5487	34	227	6400000000	6.0916e+08	5.76157e+08	5.95698e+08	5.95698e+08	8.56471e+08	8.33598e+08	6.91752e+08	8.33598e+08	7.04515e+08	7.83635e+08	7.49014e+08	7.49014e+08	0.00038979	0.000511092	0.000465239	30.0247	39.3684	35.8364
AOE93462.1	sugar kinase [synthetic bacterium JCVI-Syn3.0]	17.1821	5	292	1600000000	1.52653e+08	1.48271e+08	1.29247e+08	1.48271e+08	1.78433e+08	1.90647e+08	1.84462e+08	1.84462e+08	1.93852e+08	2.10538e+08	2.11896e+08	2.10538e+08	9.70201e-05	0.000113097	0.000130773	7.47327	8.7116	10.0732
AOE93463.1	50S ribosomal protein L27 [synthetic bacterium JCVI-Syn3.0]	35.4839	13	94	25000000000	2.50505e+09	2.65236e+09	2.65485e+09	2.65236e+09	3.43981e+09	3.26674e+09	2.54557e+09	3.26674e+09	2.56773e+09	2.56275e+09	2.80514e+09	2.56773e+09	0.00173555	0.00200289	0.00159491	133.686	154.279	122.852
AOE93464.1	hypothetical protein JCVSYN2_01335 [synthetic bacterium JCVI-Syn3.0]	50	13	105	6100000000	8.41514e+08	8.31696e+08	8.39681e+08	8.39681e+08	4.88059e+08	4.87056e+08	6.57051e+08	4.88059e+08	6.39438e+08	6.41555e+08	6.73951e+08	6.41555e+08	0.000549437	0.000299237	0.000398492	42.3221	23.0496	30.695
AOE93465.1	50S ribosomal protein L21 [synthetic bacterium JCVI-Syn3.0]	57	32	101	48000000000	4.87924e+09	5.10945e+09	4.85701e+09	4.87924e+09	6.2262e+09	5.41385e+09	5.5025e+09	5.5025e+09	5.74028e+09	5.20206e+09	5.06939e+09	5.20206e+09	0.00319269	0.00337367	0.00323118	245.926	259.867	248.891
AOE93467.1	16S rRNA (cytidine(1402)-2'-O)-methyltransferase [synthetic bacterium JCVI-Syn3.0]	37.2881	23	296	11000000000	7.46598e+08	7.05204e+08	7.59545e+08	7.46598e+08	1.12771e+09	1.43237e+09	1.21579e+09	1.21579e+09	1.42101e+09	1.85349e+09	1.73828e+09	1.73828e+09	0.00048853	0.00074542	0.00107971	37.6305	57.4182	83.1675
AOE93468.1	50S ribosomal protein L33 [synthetic bacterium JCVI-Syn3.0]	46.8085	4	48	520000000	6.20223e+07	7.86836e+07	4.92807e+07	6.20223e+07	4.73769e+07	2.33444e+07	8.4189e+07	4.73769e+07	8.31192e+07	6.13021e+07	3.06819e+07	6.13021e+07	4.05837e-05	2.90475e-05	3.80768e-05	3.12608	2.23747	2.93298
AOE93469.1	lipoprotein [synthetic bacterium JCVI-Syn3.0]	67.7871	82	358	42000000000	5.15129e+09	4.98754e+09	4.94151e+09	4.98754e+09	4.16185e+09	4.66243e+09	4.4554e+09	4.4554e+09	4.37164e+09	4.54879e+09	4.71954e+09	4.54879e+09	0.00326355	0.00273167	0.00282541	251.385	210.415	217.636
AOE93470.1	hypothetical protein JCVSYN2_01390 [synthetic bacterium JCVI-Syn3.0]	66.1836	35	208	35000000000	3.95582e+09	3.98585e+09	4.16594e+09	3.98585e+09	3.4963e+09	3.85353e+09	3.63063e+09	3.63063e+09	3.85432e+09	4.1925e+09	3.86511e+09	3.86511e+09	0.0026081	0.002226	0.00240076	200.897	171.464	184.925
AOE93471.1	acyl-phosphate glycerol 3-phosphate acyltransferase [synthetic bacterium JCVI-Syn3.0]	59.0476	52	316	27000000000	3.30741e+09	3.37688e+09	3.39338e+09	3.37688e+09	2.39793e+09	2.32469e+09	3.03254e+09	2.39793e+09	3.16789e+09	3.04131e+09	2.95798e+09	3.04131e+09	0.00220963	0.00147021	0.00188906	170.203	113.247	145.511
AOE93472.1	ACP synthase [synthetic bacterium JCVI-Syn3.0]	29.0909	3	111	200000000	2.803e+07	2.80543e+07	2.80437e+07	2.80437e+07	2.17044e+07	2.18287e+07	2.13228e+07	2.17044e+07	1.64573e+07	1.65134e+07	1.80453e+07	1.65134e+07	1.83501e-05	1.33073e-05	1.0257e-05	1.41347	1.02504	0.790079
AOE93473.1	cytidine deaminase [synthetic bacterium JCVI-Syn3.0]	61.25	20	161	19000000000	2.68271e+09	2.53682e+09	2.52672e+09	2.53682e+09	1.81614e+09	1.79846e+09	1.9688e+09	1.81614e+09	1.88323e+09	1.87914e+09	1.90798e+09	1.88323e+09	0.00165995	0.0011135	0.00116974	127.862	85.771	90.1025
AOE93474.1	hypothetical protein JCVSYN2_01410 [synthetic bacterium JCVI-Syn3.0]	32.7945	27	434	8600000000	1.34075e+09	1.24949e+09	1.23142e+09	1.24949e+09	7.12189e+08	7.6018e+08	9.438e+08	7.6018e+08	7.44939e+08	8.07217e+08	8.10017e+08	8.07217e+08	0.000817594	0.000466078	0.00050139	62.9777	35.9011	38.6211
AOE93475.1	RNA pseudouridine synthase [synthetic bacterium JCVI-Syn3.0]	39.6774	24	311	16000000000	1.9326e+09	1.89651e+09	1.97283e+09	1.9326e+09	1.77144e+09	1.67532e+09	1.78696e+09	1.77144e+09	1.62676e+09	1.64406e+09	1.69351e+09	1.64406e+09	0.00126458	0.0010861	0.00102119	97.4079	83.6602	78.6598
AOE93476.1	lipoprotein signal peptidase [synthetic bacterium JCVI-Syn3.0]	3.9604	3	203	370000000	5.99511e+07	5.89453e+07	6.05763e+07	5.99511e+07	2.17899e+07	2.1169e+07	4.79051e+07	2.17899e+07	3.76312e+07	3.50756e+07	2.69564e+07	3.50756e+07	3.92285e-05	1.33597e-05	2.17866e-05	3.02169	1.02907	1.67818
AOE93477.1	isoleucine--tRNA ligase [synthetic bacterium JCVI-Syn3.0]	49.8361	106	916	34000000000	4.27986e+09	4.37842e+09	4.22536e+09	4.27986e+09	3.39641e+09	3.28251e+09	3.77855e+09	3.39641e+09	3.6704e+09	3.58665e+09	3.40184e+09	3.58665e+09	0.00280049	0.00208239	0.00222779	215.716	160.403	171.602
AOE93478.1	hydrolase [synthetic bacterium JCVI-Syn3.0]	32.2188	16	330	4600000000	6.17658e+08	5.7545e+08	6.02871e+08	6.02871e+08	5.8101e+08	6.08035e+08	5.85346e+08	5.85346e+08	3.40845e+08	3.28434e+08	3.60349e+08	3.40845e+08	0.000394483	0.000358885	0.000211711	30.3863	27.6442	16.3077
AOE93479.1	hypothetical protein JCVSYN2_01435 [synthetic bacterium JCVI-Syn3.0]	61.5942	60	139	11000000000	9.8212e+08	9.66627e+08	1.01181e+09	9.8212e+08	1.60663e+09	1.41587e+09	1.2791e+09	1.41587e+09	1.24003e+09	1.23515e+09	1.26267e+09	1.24003e+09	0.000642641	0.000868089	0.000770226	49.5014	66.8672	59.329
AOE93480.1	cell division protein FtsZ [synthetic bacterium JCVI-Syn3.0]	55.3247	97	386	120000000000	1.07395e+10	9.96493e+09	1.12274e+10	1.07395e+10	1.69268e+10	1.28013e+10	1.50356e+10	1.50356e+10	1.48335e+10	1.41153e+10	1.43555e+10	1.43555e+10	0.00702729	0.00921857	0.00891672	541.298	710.088	686.837
AOE93481.1	16S rRNA (cytosine(1402)-N(4))-methyltransferase [synthetic bacterium JCVI-Syn3.0]	54.5455	18	309	6000000000	6.75052e+08	6.59082e+08	6.64027e+08	6.64027e+08	6.36301e+08	6.37575e+08	6.48004e+08	6.37575e+08	6.27176e+08	7.55646e+08	6.97136e+08	6.97136e+08	0.0004345	0.000390907	0.000433015	33.4687	30.1108	33.3543
AOE93483.1	50S ribosomal protein L32 [synthetic bacterium JCVI-Syn3.0]	55.9322	2	60	4300000000	3.19861e+08	4.26543e+08	5.01552e+08	4.26543e+08	4.83747e+08	4.30567e+08	6.10547e+08	4.83747e+08	3.96086e+08	7.33372e+08	3.97726e+08	3.97726e+08	0.000279105	0.000296593	0.000247041	21.4989	22.846	19.0291
AOE93484.1	hypothetical protein JCVSYN2_01465 [synthetic bacterium JCVI-Syn3.0]	43.0233	22	173	48000000000	6.92187e+09	6.49151e+09	6.57538e+09	6.57538e+09	5.42623e+09	5.94191e+09	5.28567e+09	5.42623e+09	3.62275e+09	3.79041e+09	3.94428e+09	3.79041e+09	0.00430254	0.0033269	0.00235436	331.416	256.265	181.352
AOE93485.1	phenylalanine--tRNA ligase subunit beta [synthetic bacterium JCVI-Syn3.0]	55.2897	203	795	140000000000	1.54325e+10	1.55656e+10	1.53726e+10	1.54325e+10	1.52382e+10	1.5418e+10	1.50778e+10	1.52382e+10	1.57026e+10	1.6141e+10	1.60516e+10	1.60516e+10	0.0100981	0.00934275	0.00997021	777.839	719.653	767.985
AOE93486.1	phenylalanine--tRNA ligase subunit alpha [synthetic bacterium JCVI-Syn3.0]	72.5714	108	351	53000000000	5.69747e+09	5.76168e+09	6.03776e+09	5.76168e+09	6.59473e+09	5.88874e+09	5.70335e+09	5.88874e+09	5.67352e+09	5.87532e+09	5.76743e+09	5.76743e+09	0.00377011	0.00361048	0.00358235	290.404	278.108	275.941
AOE93487.1	hypothetical protein JCVSYN2_01480 [synthetic bacterium JCVI-Syn3.0]	48.0198	40	203	34000000000	3.96983e+09	3.76401e+09	3.89627e+09	3.89627e+09	3.3818e+09	3.73902e+09	4.18045e+09	3.73902e+09	3.52278e+09	3.73569e+09	3.81017e+09	3.73569e+09	0.00254949	0.00229245	0.00232037	196.382	176.583	178.733
AOE93488.1	arginine--tRNA ligase [synthetic bacterium JCVI-Syn3.0]	51.6245	69	555	34000000000	3.87687e+09	3.79914e+09	3.79037e+09	3.79914e+09	3.12652e+09	3.44256e+09	3.71044e+09	3.44256e+09	4.00661e+09	4.18691e+09	4.06058e+09	4.06058e+09	0.00248594	0.00211069	0.00252217	191.487	162.582	194.277
AOE93489.1	ribosome recycling factor [synthetic bacterium JCVI-Syn3.0]	58.2418	68	183	110000000000	1.22874e+10	1.31761e+10	1.25274e+10	1.25274e+10	1.33368e+10	1.09377e+10	1.21484e+10	1.21484e+10	1.27505e+10	1.21552e+10	1.06805e+10	1.21552e+10	0.00819722	0.00744836	0.00755003	631.415	573.733	581.564
AOE93490.1	UMP kinase [synthetic bacterium JCVI-Syn3.0]	52.7426	48	238	31000000000	2.85592e+09	2.8357e+09	2.84803e+09	2.84803e+09	3.90235e+09	4.12364e+09	3.36391e+09	3.90235e+09	3.64738e+09	3.65699e+09	3.76609e+09	3.65699e+09	0.00186358	0.00239259	0.00227148	143.548	184.297	174.968
AOE93491.1	hypothetical protein JCVSYN2_01515 [synthetic bacterium JCVI-Syn3.0]	39.801	20	202	49000000000	8.39452e+09	8.08292e+09	7.70203e+09	8.08292e+09	3.46572e+09	3.64304e+09	4.89317e+09	3.64304e+09	4.12655e+09	4.18689e+09	4.50516e+09	4.18689e+09	0.00528899	0.0022336	0.00260063	407.4	172.05	200.321
AOE93492.1	translation elongation factor Ts [synthetic bacterium JCVI-Syn3.0]	80.678	293	296	86000000000	1.00907e+10	1.02008e+10	1.07446e+10	1.02008e+10	9.15651e+09	8.99177e+09	9.16933e+09	9.15651e+09	8.96732e+09	9.23025e+09	9.44872e+09	9.23025e+09	0.00667483	0.005614	0.00573323	514.148	432.435	441.619
AOE93493.1	30S ribosomal protein S2 [synthetic bacterium JCVI-Syn3.0]	52.7397	104	293	110000000000	1.13832e+10	1.1919e+10	1.18358e+10	1.18358e+10	1.39739e+10	1.31305e+10	1.19579e+10	1.31305e+10	1.19611e+10	1.21057e+10	1.17329e+10	1.19611e+10	0.00774467	0.00805052	0.00742944	596.556	620.116	572.275
AOE93494.1	molecular chaperone DnaJ [synthetic bacterium JCVI-Syn3.0]	37.3656	83	373	28000000000	4.11925e+09	4.13238e+09	3.96433e+09	4.11925e+09	2.68251e+09	2.45859e+09	2.62539e+09	2.62539e+09	2.71087e+09	2.65849e+09	2.6482e+09	2.65849e+09	0.00269539	0.00160967	0.00165128	207.621	123.989	127.195
AOE93495.1	molecular chaperone DnaK [synthetic bacterium JCVI-Syn3.0]	62.2673	242	592	150000000000	2.63478e+10	2.68861e+10	2.55263e+10	2.63478e+10	1.17102e+10	1.14303e+10	1.16226e+10	1.16226e+10	1.19338e+10	1.2116e+10	1.24268e+10	1.2116e+10	0.0172405	0.007126	0.00752568	1328	548.901	579.688
AOE93496.1	nucleotide exchange factor GrpE [synthetic bacterium JCVI-Syn3.0]	59	57	201	52000000000	8.0637e+09	8.56989e+09	8.065e+09	8.065e+09	4.90855e+09	4.46911e+09	4.39275e+09	4.46911e+09	4.72601e+09	4.49055e+09	4.31442e+09	4.49055e+09	0.00527726	0.00274008	0.00278924	406.497	211.063	214.849
AOE93497.1	heat-inducible transcription repressor HrcA [synthetic bacterium JCVI-Syn3.0]	37.9412	45	341	27000000000	4.36228e+09	4.44555e+09	4.05954e+09	4.36228e+09	1.98699e+09	2.19314e+09	2.351e+09	2.19314e+09	2.40497e+09	2.55643e+09	2.6401e+09	2.55643e+09	0.00285442	0.00134465	0.00158789	219.87	103.575	122.312
AOE93498.1	hypothetical protein JCVSYN2_01550 [synthetic bacterium JCVI-Syn3.0]	59.6073	231	714	91000000000	1.2112e+10	1.22555e+10	1.20892e+10	1.2112e+10	9.22614e+09	1.03098e+10	7.76797e+09	9.22614e+09	9.05956e+09	8.86766e+09	9.31217e+09	9.05956e+09	0.00792536	0.00565669	0.00562721	610.475	435.724	433.452
AOE93499.1	RNA methyltransferase [synthetic bacterium JCVI-Syn3.0]	73.4807	32	182	41000000000	3.72363e+09	3.63646e+09	3.68565e+09	3.68565e+09	5.0828e+09	5.25757e+09	4.44288e+09	5.0828e+09	4.82394e+09	4.96346e+09	5.3836e+09	4.96346e+09	0.00241167	0.00311635	0.00308298	185.766	240.046	237.476
AOE93500.1	non-canonical purine NTP pyrophosphatase, RdgB/HAM1 family [synthetic bacterium JCVI-Syn3.0]	64	32	201	25000000000	2.59569e+09	2.44496e+09	2.56177e+09	2.56177e+09	2.98295e+09	3.15131e+09	2.88971e+09	2.98295e+09	2.64427e+09	2.78145e+09	2.94789e+09	2.78145e+09	0.00167627	0.00182889	0.00172765	129.12	140.876	133.078
AOE93503.1	hypothetical protein JCVSYN2_01585 [synthetic bacterium JCVI-Syn3.0]	15.2174	1	47	850000000	4.1776e+07	4.91611e+07	4.67345e+07	4.67345e+07	1.76265e+08	8.73055e+07	6.88832e+07	8.73055e+07	1.69446e+08	1.10919e+08	9.951e+07	1.10919e+08	3.05803e-05	5.35284e-05	6.88959e-05	2.35554	4.12319	5.30691
AOE93504.1	ribonuclease J [synthetic bacterium JCVI-Syn3.0]	52.9508	106	611	19000000000	2.42356e+09	2.37639e+09	2.38552e+09	2.38552e+09	1.91068e+09	1.92754e+09	1.80761e+09	1.91068e+09	2.01179e+09	2.00483e+09	2.15209e+09	2.01179e+09	0.00156094	0.00117147	0.00124959	120.236	90.2356	96.2534
AOE93505.1	hypothetical protein JCVSYN2_01595 [synthetic bacterium JCVI-Syn3.0]	20.3822	13	315	7400000000	1.43788e+09	1.37378e+09	1.50861e+09	1.43788e+09	3.99186e+08	3.75428e+08	7.36466e+08	3.99186e+08	5.52361e+08	5.53556e+08	4.62736e+08	5.52361e+08	0.000940861	0.000244747	0.000343091	72.4726	18.8524	26.4276
AOE93506.1	LemA family protein [synthetic bacterium JCVI-Syn3.0]	66.2162	71	223	67000000000	6.85247e+09	7.23295e+09	6.83257e+09	6.85247e+09	7.54463e+09	7.49312e+09	7.32748e+09	7.49312e+09	7.99762e+09	8.07315e+09	7.64601e+09	7.99762e+09	0.00448385	0.00459415	0.0049676	345.382	353.878	382.644
AOE93507.1	hypothetical protein JCVSYN2_01610 [synthetic bacterium JCVI-Syn3.0]	9.80392	4	103	16000000000	1.26178e+09	1.41971e+09	1.35102e+09	1.35102e+09	2.5615e+09	2.2668e+09	2.13448e+09	2.2668e+09	1.74534e+09	1.73709e+09	1.52228e+09	1.73709e+09	0.000884027	0.00138981	0.00107897	68.0948	107.054	83.1108
AOE93508.1	phosphoglycerate kinase [synthetic bacterium JCVI-Syn3.0]	79.4554	231	405	110000000000	8.06464e+09	8.14699e+09	8.45613e+09	8.14699e+09	1.51258e+10	1.40313e+10	1.33491e+10	1.40313e+10	1.44354e+10	1.39991e+10	1.43914e+10	1.43914e+10	0.00533091	0.00860284	0.00893903	410.629	662.659	688.556
AOE93509.1	type I glyceraldehyde-3-phosphate dehydrogenase [synthetic bacterium JCVI-Syn3.0]	88.1657	315	339	270000000000	2.67607e+10	2.68843e+10	2.75738e+10	2.68843e+10	3.1198e+10	3.00051e+10	3.11352e+10	3.11352e+10	3.13348e+10	3.21616e+10	3.29465e+10	3.21616e+10	0.0175915	0.0190895	0.0199767	1355.04	1470.42	1538.76
AOE93510.1	primosomal protein [synthetic bacterium JCVI-Syn3.0]	39.4231	14	313	6700000000	8.61215e+08	8.10258e+08	7.96181e+08	8.10258e+08	5.93307e+08	6.14301e+08	8.59109e+08	6.14301e+08	6.65012e+08	7.378e+08	7.62817e+08	7.378e+08	0.000530185	0.000376638	0.000458273	40.8391	29.0117	35.2999
AOE93511.1	chromosome replication initiation protein [synthetic bacterium JCVI-Syn3.0]	23.0964	10	395	1700000000	3.02551e+08	2.9369e+08	2.733e+08	2.9369e+08	1.36305e+08	1.41864e+08	1.68177e+08	1.41864e+08	1.25021e+08	1.26781e+08	1.32311e+08	1.26781e+08	0.000192173	8.69789e-05	7.87483e-05	14.8027	6.69981	6.06583
AOE93512.1	DNA-formamidopyrimidine glycosylase [synthetic bacterium JCVI-Syn3.0]	65.6934	33	275	21000000000	2.39405e+09	2.36748e+09	2.42414e+09	2.39405e+09	2.02507e+09	2.23378e+09	2.26547e+09	2.23378e+09	2.44469e+09	2.42821e+09	2.41711e+09	2.42821e+09	0.00156653	0.00136956	0.00150825	120.666	105.495	116.177
AOE93513.1	DNA polymerase I [synthetic bacterium JCVI-Syn3.0]	66.3008	128	912	20000000000	2.00086e+09	2.03823e+09	2.0019e+09	2.0019e+09	2.24613e+09	2.27663e+09	2.2305e+09	2.24613e+09	2.43381e+09	2.44291e+09	2.32904e+09	2.43381e+09	0.00130992	0.00137714	0.00151172	100.901	106.078	116.445
AOE93514.1	DNA polymerase III subunit alpha [synthetic bacterium JCVI-Syn3.0]	30.3951	54	988	6300000000	7.00412e+08	7.19122e+08	7.07583e+08	7.07583e+08	6.01432e+08	6.9694e+08	7.08908e+08	6.9694e+08	7.01521e+08	7.41854e+08	7.22226e+08	7.22226e+08	0.000463001	0.000427305	0.0004486	35.664	32.9144	34.5548
AOE93515.1	tyrosine--tRNA ligase [synthetic bacterium JCVI-Syn3.0]	27.2947	34	415	17000000000	1.95146e+09	1.98333e+09	1.93238e+09	1.95146e+09	1.85925e+09	1.8313e+09	1.91012e+09	1.85925e+09	1.84469e+09	1.90649e+09	1.78097e+09	1.84469e+09	0.00127692	0.00113994	0.0011458	98.3589	87.8069	88.2587
AOE93516.1	nicotinate phosphoribosyltransferase [synthetic bacterium JCVI-Syn3.0]	76.7705	68	354	27000000000	3.33223e+09	3.27343e+09	3.23794e+09	3.27343e+09	2.73996e+09	2.53914e+09	3.08338e+09	2.73996e+09	3.05433e+09	2.98415e+09	2.75542e+09	2.98415e+09	0.00214194	0.00167991	0.00185356	164.99	129.4	142.776
AOE93517.1	hypothetical protein JCVSYN2_01660 [synthetic bacterium JCVI-Syn3.0]	87.1287	48	203	39000000000	4.63572e+09	4.61743e+09	4.38644e+09	4.61743e+09	3.81319e+09	4.20759e+09	4.28713e+09	4.20759e+09	3.9626e+09	4.73962e+09	4.35029e+09	4.35029e+09	0.00302137	0.00257974	0.00270212	232.73	198.712	208.139
AOE93518.1	6-phosphogluconate dehydratase [synthetic bacterium JCVI-Syn3.0]	60.2151	91	280	74000000000	7.26965e+09	7.52576e+09	7.11159e+09	7.26965e+09	8.3968e+09	8.69128e+09	7.93182e+09	8.3968e+09	8.85426e+09	8.98306e+09	9.23578e+09	8.98306e+09	0.00475683	0.00514821	0.00557969	366.409	396.556	429.792
AOE93519.1	6-phosphogluconate dehydratase [synthetic bacterium JCVI-Syn3.0]	46.2898	61	284	37000000000	4.01158e+09	4.1612e+09	4.06731e+09	4.06731e+09	4.44993e+09	3.97628e+09	4.16077e+09	4.16077e+09	4.07506e+09	4.12619e+09	3.97169e+09	4.07506e+09	0.00266141	0.00255103	0.00253116	205.003	196.501	194.97
AOE93520.1	Fur family transcriptional regulator [synthetic bacterium JCVI-Syn3.0]	37.6623	12	155	3000000000	3.49433e+08	3.51127e+08	3.56063e+08	3.51127e+08	2.37961e+08	2.48586e+08	3.33084e+08	2.48586e+08	3.83505e+08	3.79733e+08	3.60509e+08	3.79733e+08	0.000229757	0.000152412	0.000235865	17.6977	11.74	18.1682
AOE93521.1	acyl carrier protein [synthetic bacterium JCVI-Syn3.0]	61.6438	9	74	24000000000	2.5766e+09	2.73528e+09	2.87458e+09	2.73528e+09	2.49479e+09	3.12294e+09	2.78666e+09	2.78666e+09	2.40576e+09	2.36602e+09	2.63737e+09	2.40576e+09	0.0017898	0.00170854	0.0014943	137.865	131.606	115.103
AOE93524.1	leucine--tRNA ligase [synthetic bacterium JCVI-Syn3.0]	51.6169	89	805	33000000000	4.10806e+09	4.19799e+09	4.1211e+09	4.1211e+09	3.46462e+09	3.41763e+09	3.46182e+09	3.46182e+09	3.50519e+09	3.37586e+09	3.34772e+09	3.37586e+09	0.00269661	0.00212249	0.00209686	207.714	163.492	161.517
AOE93525.1	MOLPALP family lipoprotein [synthetic bacterium JCVI-Syn3.0]	51.9914	103	930	17000000000	2.20766e+09	2.16561e+09	2.20589e+09	2.20589e+09	1.70593e+09	1.67433e+09	1.92547e+09	1.70593e+09	1.73988e+09	1.70852e+09	1.66671e+09	1.70852e+09	0.0014434	0.00104594	0.00106122	111.182	80.5663	81.7436
AOE93526.1	30S ribosomal protein S9 [synthetic bacterium JCVI-Syn3.0]	24.2424	41	133	68000000000	8.3709e+09	8.45487e+09	8.70333e+09	8.45487e+09	7.11515e+09	8.3349e+09	7.67965e+09	7.67965e+09	6.04641e+09	6.54347e+09	6.75132e+09	6.54347e+09	0.00553237	0.00470851	0.00406438	426.147	362.687	313.071
AOE93527.1	50S ribosomal protein L13 [synthetic bacterium JCVI-Syn3.0]	80.7947	64	152	110000000000	1.25397e+10	1.2297e+10	1.26911e+10	1.25397e+10	1.63412e+10	1.53439e+10	1.31276e+10	1.53439e+10	9.77473e+09	9.32488e+09	8.55994e+09	9.32488e+09	0.00820523	0.00940756	0.00579201	632.032	724.646	446.147
AOE93528.1	ABC transporter permease [synthetic bacterium JCVI-Syn3.0]	44.8226	94	1382	14000000000	1.82602e+09	1.89931e+09	1.8758e+09	1.8758e+09	1.34008e+09	1.37857e+09	1.49514e+09	1.37857e+09	1.41761e+09	1.37935e+09	1.38812e+09	1.38812e+09	0.00122741	0.000845224	0.00086221	94.5452	65.1059	66.4143
AOE93529.1	tRNA pseudouridine(38-40) synthase TruA [synthetic bacterium JCVI-Syn3.0]	11.5538	7	252	1800000000	2.68861e+08	2.80898e+08	2.59151e+08	2.68861e+08	1.5155e+08	1.12484e+08	2.01325e+08	1.5155e+08	1.9218e+08	1.84425e+08	1.49126e+08	1.84425e+08	0.000175926	9.29174e-05	0.000114553	13.5513	7.15724	8.82379
AOE93530.1	ABC transporter permease [synthetic bacterium JCVI-Syn3.0]	15.4762	12	337	3300000000	5.08027e+08	4.86701e+08	4.95466e+08	4.95466e+08	2.26138e+08	2.48232e+08	3.67108e+08	2.48232e+08	3.28162e+08	3.19779e+08	3.20387e+08	3.20387e+08	0.000324204	0.000152195	0.000199004	24.9728	11.7233	15.3288
AOE93531.1	energy-coupling factor transporter ATPase [synthetic bacterium JCVI-Syn3.0]	73.5974	86	304	47000000000	5.38765e+09	5.60293e+09	5.43306e+09	5.43306e+09	5.06817e+09	5.31504e+09	4.64614e+09	5.06817e+09	5.31402e+09	5.10502e+09	5.12797e+09	5.12797e+09	0.00355508	0.00310737	0.00318516	273.84	239.355	245.346
AOE93533.1	50S ribosomal protein L17 [synthetic bacterium JCVI-Syn3.0]	57.1429	60	120	21000000000	2.56891e+09	2.32336e+09	2.22533e+09	2.32336e+09	2.32922e+09	2.26006e+09	2.70723e+09	2.32922e+09	2.11821e+09	2.22774e+09	2.23993e+09	2.22774e+09	0.00152027	0.00142808	0.00138373	117.103	110.002	106.586
AOE93534.1	DNA-directed RNA polymerase subunit alpha [synthetic bacterium JCVI-Syn3.0]	65.9306	114	318	36000000000	3.69397e+09	3.71562e+09	3.73039e+09	3.71562e+09	3.6582e+09	3.69125e+09	4.02245e+09	3.69125e+09	4.42428e+09	4.37407e+09	4.68977e+09	4.42428e+09	0.00243128	0.00226316	0.00274807	187.277	174.327	211.678
AOE93535.1	30S ribosomal protein S11 [synthetic bacterium JCVI-Syn3.0]	59.6899	84	130	37000000000	4.51894e+09	4.27594e+09	4.89762e+09	4.51894e+09	3.80769e+09	3.41015e+09	4.29065e+09	3.80769e+09	3.81691e+09	3.95526e+09	4.02684e+09	3.95526e+09	0.00295693	0.00233456	0.00245675	227.766	179.826	189.238
AOE93536.1	30S ribosomal protein S13 [synthetic bacterium JCVI-Syn3.0]	52.0661	54	122	130000000000	1.2812e+10	1.36731e+10	1.31875e+10	1.31875e+10	1.48916e+10	1.52196e+10	1.52285e+10	1.52196e+10	1.53984e+10	1.47692e+10	1.48201e+10	1.48201e+10	0.00862912	0.00933137	0.00920528	664.684	718.777	709.065
AOE93538.1	type I methionyl aminopeptidase [synthetic bacterium JCVI-Syn3.0]	66.1355	45	252	13000000000	1.40921e+09	1.36028e+09	1.32555e+09	1.36028e+09	1.51531e+09	1.57556e+09	1.50848e+09	1.51531e+09	1.27201e+09	1.61523e+09	1.41838e+09	1.41838e+09	0.000890085	0.000929059	0.000881006	68.5615	71.5636	67.8621
AOE93539.1	adenylate kinase [synthetic bacterium JCVI-Syn3.0]	61.0329	73	214	46000000000	3.98708e+09	4.2275e+09	4.22909e+09	4.2275e+09	5.60781e+09	6.29229e+09	5.2583e+09	5.60781e+09	5.36617e+09	5.63228e+09	5.39948e+09	5.39948e+09	0.00276623	0.00343823	0.00335381	213.077	264.84	258.337
AOE93540.1	preprotein translocase subunit SecY [synthetic bacterium JCVI-Syn3.0]	13.4855	10	483	12000000000	1.15795e+09	1.30925e+09	1.41311e+09	1.30925e+09	1.53141e+09	1.23673e+09	1.11739e+09	1.23673e+09	1.51135e+09	1.30001e+09	1.42282e+09	1.42282e+09	0.000856696	0.00075826	0.000883762	65.9895	58.4073	68.0744
AOE93541.1	50S ribosomal protein L15 [synthetic bacterium JCVI-Syn3.0]	48.2759	30	146	53000000000	4.6579e+09	5.65491e+09	7.03898e+09	5.65491e+09	8.69326e+09	5.75626e+09	5.37437e+09	5.75626e+09	6.19878e+09	4.90948e+09	4.71605e+09	4.90948e+09	0.00370024	0.00352926	0.00304945	285.022	271.852	234.893
AOE93542.1	30S ribosomal protein S5 [synthetic bacterium JCVI-Syn3.0]	68.5039	169	255	64000000000	7.57497e+09	7.83442e+09	7.88402e+09	7.83442e+09	7.22587e+09	6.54875e+09	7.21583e+09	7.21583e+09	6.59967e+09	6.84198e+09	6.27449e+09	6.59967e+09	0.00512638	0.00442414	0.00409929	394.875	340.782	315.76
AOE93543.1	50S ribosomal protein L18 [synthetic bacterium JCVI-Syn3.0]	64.6552	50	117	47000000000	5.43876e+09	5.90949e+09	5.42223e+09	5.43876e+09	4.5354e+09	4.0593e+09	5.83759e+09	4.5354e+09	5.50142e+09	5.30229e+09	4.99351e+09	5.30229e+09	0.00355881	0.00278073	0.00329344	274.128	214.194	253.687
AOE93544.1	50S ribosomal protein L6 [synthetic bacterium JCVI-Syn3.0]	75.5556	79	181	130000000000	1.33448e+10	1.41996e+10	1.53509e+10	1.41996e+10	1.74605e+10	1.57671e+10	1.28154e+10	1.57671e+10	1.40838e+10	1.33061e+10	1.36719e+10	1.36719e+10	0.00929136	0.00966706	0.00849208	715.695	744.634	654.128
AOE93545.1	30S ribosomal protein S8 [synthetic bacterium JCVI-Syn3.0]	41.8605	89	130	37000000000	4.6178e+09	4.29982e+09	4.30598e+09	4.30598e+09	4.07047e+09	3.51655e+09	4.27303e+09	4.07047e+09	3.85397e+09	3.98236e+09	4.08002e+09	3.98236e+09	0.00281758	0.00249567	0.00247358	217.032	192.236	190.535
AOE93546.1	30S ribosomal protein S14 [synthetic bacterium JCVI-Syn3.0]	40.9836	24	62	63000000000	6.23621e+09	6.69944e+09	6.57417e+09	6.57417e+09	8.32079e+09	8.28976e+09	6.8523e+09	8.28976e+09	6.3404e+09	7.07442e+09	6.61251e+09	6.61251e+09	0.00430175	0.00508258	0.00410726	331.355	391.501	316.374
AOE93547.1	50S ribosomal protein L5 [synthetic bacterium JCVI-Syn3.0]	76.6667	180	181	130000000000	1.3948e+10	1.40515e+10	1.37519e+10	1.3948e+10	1.69125e+10	1.52936e+10	1.38575e+10	1.52936e+10	1.40894e+10	1.36989e+10	1.43967e+10	1.40894e+10	0.00912677	0.00937675	0.00875141	703.017	722.272	674.104
AOE93548.1	50S ribosomal protein L24 [synthetic bacterium JCVI-Syn3.0]	75	69	109	48000000000	5.75872e+09	6.29451e+09	6.05903e+09	6.05903e+09	4.96962e+09	4.27011e+09	5.45267e+09	4.96962e+09	5.14747e+09	5.32026e+09	4.72761e+09	5.14747e+09	0.00396467	0.00304695	0.00319727	305.391	234.701	246.28
AOE93549.1	50S ribosomal protein L14 [synthetic bacterium JCVI-Syn3.0]	25.4098	20	123	16000000000	1.98744e+09	2.22425e+09	1.95904e+09	1.98744e+09	1.53418e+09	1.33032e+09	2.00365e+09	1.53418e+09	1.79252e+09	1.68958e+09	1.47902e+09	1.68958e+09	0.00130047	0.000940628	0.00104945	100.172	72.4547	80.8374
AOE93550.1	30S ribosomal protein S17 [synthetic bacterium JCVI-Syn3.0]	48.8372	45	87	77000000000	1.05199e+10	1.05984e+10	1.02219e+10	1.05199e+10	6.59534e+09	5.49678e+09	9.44733e+09	6.59534e+09	8.23852e+09	8.09907e+09	7.78273e+09	8.09907e+09	0.00688361	0.00404371	0.00503061	530.231	311.479	387.498
AOE93551.1	50S ribosomal protein L29 [synthetic bacterium JCVI-Syn3.0]	63.7681	60	139	100000000000	9.94607e+09	1.05831e+10	1.07907e+10	1.05831e+10	1.44746e+10	1.34331e+10	9.98575e+09	1.34331e+10	1.04409e+10	9.99337e+09	1.03524e+10	1.03524e+10	0.00692497	0.00823604	0.00643027	533.416	634.406	495.311
AOE93552.1	50S ribosomal protein L16 [synthetic bacterium JCVI-Syn3.0]	42.3358	53	138	35000000000	3.41868e+09	3.32591e+09	3.32369e+09	3.32591e+09	5.37852e+09	4.70051e+09	3.5315e+09	4.70051e+09	3.78808e+09	3.80995e+09	3.72315e+09	3.78808e+09	0.00217628	0.00288196	0.00235291	167.635	221.991	181.24
AOE93553.1	30S ribosomal protein S3 [synthetic bacterium JCVI-Syn3.0]	50.2146	65	234	210000000000	2.02703e+10	1.98615e+10	1.9741e+10	1.98615e+10	2.49015e+10	2.40494e+10	2.37022e+10	2.40494e+10	2.62684e+10	2.55517e+10	2.56541e+10	2.56541e+10	0.0129962	0.014745	0.0159347	1001.07	1135.78	1227.42
AOE93554.1	50S ribosomal protein L22 [synthetic bacterium JCVI-Syn3.0]	68.4685	62	112	67000000000	7.87177e+09	7.39822e+09	7.07073e+09	7.39822e+09	8.05526e+09	7.32469e+09	7.76924e+09	7.76924e+09	7.35098e+09	7.35898e+09	6.80012e+09	7.35098e+09	0.00484096	0.00476344	0.00456595	372.89	366.919	351.706
AOE93555.1	30S ribosomal protein S19 [synthetic bacterium JCVI-Syn3.0]	84.0909	89	89	120000000000	1.19607e+10	1.25084e+10	1.30035e+10	1.25084e+10	1.49295e+10	1.48744e+10	1.26308e+10	1.48744e+10	1.31936e+10	1.31689e+10	1.37301e+10	1.31936e+10	0.00818475	0.00911975	0.00819499	630.455	702.476	631.243
AOE93556.1	50S ribosomal protein L2 [synthetic bacterium JCVI-Syn3.0]	63.1206	148	283	33000000000	3.65167e+09	3.68952e+09	3.6429e+09	3.65167e+09	3.6734e+09	3.40666e+09	3.72297e+09	3.6734e+09	3.6098e+09	3.88067e+09	3.72242e+09	3.72242e+09	0.00238944	0.00225222	0.00231212	184.053	173.484	178.098
AOE93557.1	50S ribosomal protein L23 [synthetic bacterium JCVI-Syn3.0]	64.8936	51	95	66000000000	7.29669e+09	6.92065e+09	6.69036e+09	6.92065e+09	7.1456e+09	7.40796e+09	8.12881e+09	7.40796e+09	7.59517e+09	7.32111e+09	7.49366e+09	7.49366e+09	0.00452847	0.00454193	0.00465457	348.819	349.856	358.532
AOE93558.1	50S ribosomal protein L4 [synthetic bacterium JCVI-Syn3.0]	68.75	64	209	48000000000	4.92115e+09	5.1439e+09	5.1114e+09	5.1114e+09	6.08107e+09	5.61907e+09	5.22233e+09	5.61907e+09	5.7367e+09	5.18922e+09	4.97516e+09	5.18922e+09	0.0033446	0.00344514	0.0032232	257.628	265.372	248.277
AOE93559.1	50S ribosomal protein L3 [synthetic bacterium JCVI-Syn3.0]	44.3946	56	224	91000000000	8.89913e+09	8.60386e+09	8.45711e+09	8.60386e+09	1.3736e+10	1.09414e+10	9.73711e+09	1.09414e+10	1.06872e+10	1.02171e+10	9.72112e+09	1.02171e+10	0.00562986	0.00670832	0.00634618	433.657	516.728	488.833
AOE93560.1	30S ribosomal protein S10 [synthetic bacterium JCVI-Syn3.0]	73.5294	50	103	160000000000	1.46018e+10	1.43766e+10	1.42688e+10	1.43766e+10	2.52819e+10	2.22796e+10	1.67939e+10	2.22796e+10	1.7579e+10	1.68793e+10	1.7939e+10	1.7579e+10	0.00940722	0.01366	0.0109189	724.619	1052.2	841.062
AOE93561.1	bifunctional 5,10-methylene-tetrahydrofolate dehydrogenase/5,10-methylene-tetrahydrofolate cyclohydrolase [synthetic bacterium JCVI-Syn3.0]	32.9861	19	289	14000000000	1.51553e+09	1.48382e+09	1.55789e+09	1.51553e+09	1.52222e+09	1.55656e+09	1.49191e+09	1.52222e+09	1.62013e+09	1.61763e+09	1.63431e+09	1.62013e+09	0.000991676	0.0009333	0.00100632	76.3868	71.8902	77.5146
AOE93562.1	sodium transporter [synthetic bacterium JCVI-Syn3.0]	12.5704	8	534	2300000000	3.6764e+08	3.46178e+08	3.11213e+08	3.46178e+08	1.55068e+08	1.4853e+08	2.62318e+08	1.55068e+08	2.30085e+08	2.34485e+08	2.44484e+08	2.34485e+08	0.000226518	9.50748e-05	0.000145647	17.4483	7.32342	11.2189
AOE93563.1	potassium transporter TrkA [synthetic bacterium JCVI-Syn3.0]	43.8017	36	243	63000000000	6.06052e+09	6.06744e+09	6.03132e+09	6.06052e+09	7.95354e+09	6.73024e+09	6.72395e+09	6.73024e+09	8.00383e+09	7.57437e+09	7.8548e+09	7.8548e+09	0.00396564	0.00412641	0.00487889	305.466	317.849	375.811
AOE93564.1	glutaminyl-tRNA synthase (glutamine-hydrolyzing) subunit B [synthetic bacterium JCVI-Syn3.0]	63.4656	97	480	37000000000	4.24152e+09	4.21087e+09	4.17101e+09	4.21087e+09	4.17773e+09	4.4101e+09	3.71723e+09	4.17773e+09	3.95499e+09	3.9511e+09	4.16546e+09	3.95499e+09	0.00275535	0.00256143	0.00245658	212.239	197.302	189.226
AOE93565.1	aspartyl/glutamyl-tRNA amidotransferase subunit A [synthetic bacterium JCVI-Syn3.0]	65.3608	97	486	25000000000	2.86115e+09	2.99263e+09	2.81293e+09	2.86115e+09	2.82269e+09	2.95805e+09	2.56361e+09	2.82269e+09	2.65362e+09	2.68537e+09	2.64996e+09	2.65362e+09	0.00187217	0.00173064	0.00164825	144.209	133.307	126.962
AOE93566.1	glutamyl-tRNA amidotransferase [synthetic bacterium JCVI-Syn3.0]	85.7143	11	99	15000000000	1.49546e+09	1.75035e+09	1.72528e+09	1.72528e+09	1.81571e+09	2.07709e+09	1.50776e+09	1.81571e+09	1.41547e+09	1.7789e+09	1.43397e+09	1.43397e+09	0.00112892	0.00111324	0.000890688	86.9588	85.7509	68.6079
AOE93567.1	DNA ligase (NAD(+)) LigA [synthetic bacterium JCVI-Syn3.0]	34.7305	38	669	8400000000	9.79442e+08	9.32456e+08	9.43336e+08	9.43336e+08	9.01638e+08	9.17388e+08	8.84221e+08	9.01638e+08	9.06776e+08	9.44085e+08	9.90657e+08	9.44085e+08	0.000617263	0.000552808	0.000586404	47.5466	42.5817	45.1695
AOE93568.1	hypothetical protein JCVSYN2_01955 [synthetic bacterium JCVI-Syn3.0]	11.7385	9	674	1500000000	2.27575e+08	2.20212e+08	2.03997e+08	2.20212e+08	1.17948e+08	1.28392e+08	1.61114e+08	1.28392e+08	1.44672e+08	1.37689e+08	1.58401e+08	1.44672e+08	0.000144094	7.8719e-05	8.98605e-05	11.0993	6.06357	6.92178
AOE93569.1	pseudouridine synthase [synthetic bacterium JCVI-Syn3.0]	38.7417	21	303	5100000000	7.02233e+08	7.16182e+08	7.04414e+08	7.04414e+08	4.38601e+08	4.38093e+08	5.53034e+08	4.38601e+08	5.35557e+08	5.14187e+08	4.97699e+08	5.14187e+08	0.000460927	0.000268913	0.00031938	35.5043	20.7138	24.6012
AOE93570.1	hypothetical protein JCVSYN2_01965 [synthetic bacterium JCVI-Syn3.0]	9.31677	7	323	2900000000	4.34656e+08	4.21836e+08	4.01734e+08	4.21836e+08	1.89917e+08	2.20184e+08	3.12251e+08	2.20184e+08	2.97895e+08	2.95435e+08	3.26093e+08	2.97895e+08	0.000276024	0.000134998	0.000185033	21.2616	10.3987	14.2527
AOE93571.1	phosphocarrier protein HPr [synthetic bacterium JCVI-Syn3.0]	83.1461	98	90	66000000000	5.27756e+09	5.75208e+09	5.85906e+09	5.75208e+09	9.68426e+09	8.72564e+09	7.56798e+09	8.72564e+09	6.97956e+09	8.047e+09	8.10686e+09	8.047e+09	0.00376382	0.00534983	0.00499827	289.92	412.086	385.007
AOE93572.1	AAA family ATPase [synthetic bacterium JCVI-Syn3.0]	45.9834	64	723	34000000000	4.24155e+09	4.31563e+09	4.40908e+09	4.31563e+09	3.43123e+09	3.58652e+09	3.45783e+09	3.45783e+09	3.50165e+09	3.4777e+09	3.57881e+09	3.50165e+09	0.00282389	0.00212005	0.002175	217.519	163.303	167.536
AOE93573.1	transporter [synthetic bacterium JCVI-Syn3.0]	17.5299	4	252	530000000	7.18193e+07	7.83589e+07	7.16846e+07	7.18193e+07	4.2978e+07	4.95396e+07	5.95745e+07	4.95396e+07	5.22899e+07	5.517e+07	4.85853e+07	5.22899e+07	4.69943e-05	3.03735e-05	3.2479e-05	3.61988	2.33961	2.5018
AOE93574.1	glycosyl transferase [synthetic bacterium JCVI-Syn3.0]	80.1887	46	319	20000000000	2.34251e+09	2.41603e+09	2.36908e+09	2.36908e+09	1.94064e+09	1.9688e+09	2.15314e+09	1.9688e+09	2.38346e+09	2.28387e+09	2.14248e+09	2.28387e+09	0.00155019	0.0012071	0.00141859	119.408	92.9806	109.271
AOE93575.1	ABC transporter permease [synthetic bacterium JCVI-Syn3.0]	3.09278	2	583	360000000	3.37353e+07	4.9629e+07	3.38038e+07	3.38038e+07	3.05644e+07	3.28826e+07	4.67538e+07	3.28826e+07	4.45272e+07	4.73267e+07	4.07771e+07	4.45272e+07	2.21192e-05	2.01608e-05	2.76574e-05	1.7038	1.55295	2.13039
AOE93576.1	ABC transporter ATP-binding protein [synthetic bacterium JCVI-Syn3.0]	36.9478	21	250	7100000000	8.1073e+08	8.38656e+08	7.90877e+08	8.1073e+08	7.29332e+08	7.34505e+08	7.80901e+08	7.34505e+08	8.13297e+08	8.14059e+08	7.87643e+08	8.13297e+08	0.000530494	0.000450337	0.000505167	40.8629	34.6885	38.912
AOE93577.1	ABC transporter substrate-binding protein [synthetic bacterium JCVI-Syn3.0]	51.3347	69	488	39000000000	4.1616e+09	4.21189e+09	4.17423e+09	4.17423e+09	4.69246e+09	4.75475e+09	4.75191e+09	4.75191e+09	4.18158e+09	4.03835e+09	4.03324e+09	4.03835e+09	0.00273137	0.00291347	0.00250836	210.392	224.419	193.214
AOE93578.1	hypothetical protein JCVSYN2_02005 [synthetic bacterium JCVI-Syn3.0]	47.0383	27	288	14000000000	1.66134e+09	1.60003e+09	1.574e+09	1.60003e+09	1.53638e+09	1.50256e+09	1.38843e+09	1.50256e+09	1.50422e+09	1.62929e+09	1.60376e+09	1.60376e+09	0.00104697	0.000921241	0.00099615	80.6457	70.9614	76.7314
AOE93579.1	glucosamine-6-phosphate deaminase [synthetic bacterium JCVI-Syn3.0]	52.459	47	245	25000000000	3.00426e+09	2.81181e+09	2.75692e+09	2.81181e+09	2.96765e+09	2.88327e+09	2.76892e+09	2.88327e+09	2.56909e+09	2.62701e+09	2.61105e+09	2.61105e+09	0.00183988	0.00176778	0.00162182	141.722	136.168	124.925
AOE93580.1	triose-phosphate isomerase [synthetic bacterium JCVI-Syn3.0]	89.1129	102	249	90000000000	8.12641e+09	8.09234e+09	8.23986e+09	8.12641e+09	1.0676e+10	1.11416e+10	1.04861e+10	1.0676e+10	1.09723e+10	1.11275e+10	1.11378e+10	1.11275e+10	0.00531744	0.00654561	0.00691168	409.592	504.195	532.393
AOE93581.1	HAD family hydrolase [synthetic bacterium JCVI-Syn3.0]	56.4748	38	279	21000000000	2.07115e+09	2.11991e+09	2.08751e+09	2.08751e+09	2.49703e+09	2.90275e+09	2.25702e+09	2.49703e+09	2.33762e+09	2.31318e+09	2.41383e+09	2.33762e+09	0.00136594	0.00153097	0.00145197	105.216	117.927	111.843
AOE93582.1	phosphoglycerate mutase (2,3-diphosphoglycerate-independent) [synthetic bacterium JCVI-Syn3.0]	60.8286	93	532	63000000000	6.12966e+09	6.38187e+09	6.38793e+09	6.38187e+09	8.37893e+09	6.90254e+09	7.3054e+09	7.3054e+09	7.41755e+09	7.10187e+09	6.99426e+09	7.10187e+09	0.00417592	0.00447905	0.00441122	321.663	345.012	339.787
AOE93583.1	hypothetical protein JCVSYN2_02075 [synthetic bacterium JCVI-Syn3.0]	25.6281	6	200	1900000000	3.12281e+08	3.24399e+08	3.21598e+08	3.21598e+08	1.61839e+08	1.51554e+08	1.70019e+08	1.61839e+08	1.44895e+08	1.64297e+08	1.49118e+08	1.49118e+08	0.000210435	9.9226e-05	9.26222e-05	16.2094	7.64318	7.13451
AOE93584.1	deoxyribose-phosphate aldolase [synthetic bacterium JCVI-Syn3.0]	65.7658	70	223	34000000000	3.39883e+09	3.47687e+09	3.38773e+09	3.39883e+09	4.10444e+09	3.92957e+09	4.02909e+09	4.02909e+09	3.70414e+09	4.10837e+09	3.86097e+09	3.86097e+09	0.00222399	0.0024703	0.00239818	171.31	190.282	184.727
AOE93585.1	phosphomannomutase [synthetic bacterium JCVI-Syn3.0]	54.4803	101	559	54000000000	5.52049e+09	5.2964e+09	5.43722e+09	5.43722e+09	5.88168e+09	5.87586e+09	6.3832e+09	5.88168e+09	6.43279e+09	6.51419e+09	6.65817e+09	6.51419e+09	0.0035578	0.00360615	0.00404619	274.05	277.775	311.67
AOE93586.1	purine-nucleoside phosphorylase [synthetic bacterium JCVI-Syn3.0]	66.3594	68	218	140000000000	1.24838e+10	1.27522e+10	1.20781e+10	1.24838e+10	1.48489e+10	1.70664e+10	1.69797e+10	1.69797e+10	1.63535e+10	1.8213e+10	1.92245e+10	1.8213e+10	0.00816863	0.0104105	0.0113127	629.214	801.901	871.396
AOE93588.1	ribonucleotide-diphosphate reductase subunit alpha [synthetic bacterium JCVI-Syn3.0]	58.6111	175	721	71000000000	7.47686e+09	7.57607e+09	7.5819e+09	7.57607e+09	8.232e+09	9.24074e+09	7.46574e+09	8.232e+09	7.56074e+09	7.85304e+09	8.01291e+09	7.85304e+09	0.00495734	0.00504717	0.00487779	381.854	388.773	375.727
AOE93589.1	ribonucleotide reductase assembly protein NrdI [synthetic bacterium JCVI-Syn3.0]	43.3121	16	158	9200000000	9.50577e+08	9.8954e+08	1.01002e+09	9.8954e+08	1.32268e+09	1.41188e+09	1.03291e+09	1.32268e+09	8.25249e+08	8.14749e+08	8.42387e+08	8.25249e+08	0.000647497	0.000810958	0.000512591	49.8754	62.4665	39.4839
AOE93590.1	class 1b ribonucleoside-diphosphate reductase subunit beta [synthetic bacterium JCVI-Syn3.0]	44.5428	69	340	61000000000	5.60584e+09	5.89134e+09	5.90489e+09	5.89134e+09	6.69377e+09	7.30682e+09	7.25287e+09	7.25287e+09	7.48067e+09	7.06315e+09	7.80065e+09	7.48067e+09	0.00385495	0.00444685	0.0046465	296.939	342.532	357.911
AOE93591.1	preprotein translocase subunit SecG [synthetic bacterium JCVI-Syn3.0]	22.3404	1	95	500000000	8.91706e+07	7.25691e+07	7.58743e+07	7.58743e+07	3.03223e+07	3.84973e+07	5.64264e+07	3.84973e+07	4.93295e+07	4.3291e+07	4.45196e+07	4.45196e+07	4.96476e-05	2.36033e-05	2.76527e-05	3.82426	1.81811	2.13003
AOE93592.1	ribonuclease R [synthetic bacterium JCVI-Syn3.0]	50.7102	76	705	32000000000	2.81562e+09	2.7703e+09	2.76502e+09	2.7703e+09	3.68992e+09	4.30219e+09	3.72752e+09	3.72752e+09	3.98837e+09	3.94286e+09	3.9982e+09	3.98837e+09	0.00181272	0.0022854	0.00247732	139.63	176.04	190.823
AOE93593.1	SsrA-binding protein [synthetic bacterium JCVI-Syn3.0]	39.1892	20	149	18000000000	1.84781e+09	1.8122e+09	1.94749e+09	1.84781e+09	1.61941e+09	1.76847e+09	2.21859e+09	1.76847e+09	2.3039e+09	2.37866e+09	2.10347e+09	2.3039e+09	0.0012091	0.00108428	0.00143103	93.1345	83.5196	110.23
AOE93594.1	hypothetical protein JCVSYN2_02130 [synthetic bacterium JCVI-Syn3.0]	25.4658	9	162	2100000000	1.96741e+08	2.14127e+08	1.88097e+08	1.96741e+08	2.71846e+08	2.46163e+08	2.36798e+08	2.46163e+08	2.69839e+08	2.54067e+08	2.22321e+08	2.54067e+08	0.000128736	0.000150926	0.00015781	9.91628	11.6256	12.1558
AOE93595.1	hypothetical protein JCVSYN2_02135 [synthetic bacterium JCVI-Syn3.0]	20.4819	4	84	690000000	9.73199e+07	9.5777e+07	9.48898e+07	9.5777e+07	3.5431e+07	3.41325e+07	1.03745e+08	3.5431e+07	7.93108e+07	9.35564e+07	5.58371e+07	7.93108e+07	6.26708e-05	2.17233e-05	4.92627e-05	4.82741	1.6733	3.7946
AOE93596.1	PTS sugar transporter [synthetic bacterium JCVI-Syn3.0]	37.8523	238	746	150000000000	1.58625e+10	1.64781e+10	1.69039e+10	1.64781e+10	1.72653e+10	1.49008e+10	1.58931e+10	1.58931e+10	1.80017e+10	1.75984e+10	1.70963e+10	1.75984e+10	0.0107823	0.00974429	0.010931	830.541	750.584	841.994
AOE93597.1	magnesium-translocating P-type ATPase [synthetic bacterium JCVI-Syn3.0]	38.1104	57	943	12000000000	1.28081e+09	1.26202e+09	1.281e+09	1.28081e+09	1.36273e+09	1.34015e+09	1.22375e+09	1.34015e+09	1.3866e+09	1.3858e+09	1.47713e+09	1.3866e+09	0.000838088	0.000821667	0.000861266	64.5562	63.2914	66.3416
AOE93598.1	hypothetical protein JCVSYN2_02150 [synthetic bacterium JCVI-Syn3.0]	78.7879	17	100	19000000000	2.07699e+09	2.18854e+09	2.14874e+09	2.14874e+09	2.13564e+09	2.08745e+09	2.1944e+09	2.13564e+09	2.05238e+09	2.05338e+09	2.06247e+09	2.05338e+09	0.00140601	0.0013094	0.00127542	108.302	100.86	98.2433
AOE93599.1	F0F1 ATP synthase subunit beta [synthetic bacterium JCVI-Syn3.0]	70.9474	105	476	68000000000	6.94109e+09	6.88392e+09	6.784e+09	6.88392e+09	8.10109e+09	8.32058e+09	7.07171e+09	8.10109e+09	7.71511e+09	7.8764e+09	8.30609e+09	7.8764e+09	0.00450443	0.0049669	0.00489231	346.968	382.591	376.845
AOE93600.1	F0F1 ATP synthase subunit gamma [synthetic bacterium JCVI-Syn3.0]	44.6429	40	281	26000000000	2.71488e+09	2.68193e+09	2.70474e+09	2.70474e+09	3.12457e+09	3.15984e+09	2.82071e+09	3.12457e+09	2.87681e+09	2.85659e+09	3.05993e+09	2.87681e+09	0.00176982	0.00191573	0.00178688	136.326	147.564	137.64
AOE93601.1	F0F1 ATP synthase subunit alpha [synthetic bacterium JCVI-Syn3.0]	39.2381	66	526	67000000000	6.41958e+09	6.48211e+09	6.61006e+09	6.48211e+09	8.1753e+09	8.4073e+09	7.38472e+09	8.1753e+09	7.7957e+09	7.70431e+09	8.02092e+09	7.7957e+09	0.00424151	0.0050124	0.00484218	326.715	386.095	372.983
AOE93602.1	ATP synthase F1 subunit delta [synthetic bacterium JCVI-Syn3.0]	44.7514	20	182	6100000000	6.28487e+08	6.26535e+08	5.86981e+08	6.26535e+08	7.17953e+08	5.98952e+08	8.21656e+08	7.17953e+08	8.08469e+08	7.40566e+08	5.70401e+08	7.40566e+08	0.000409967	0.000440188	0.000459991	31.579	33.9068	35.4322
AOE93603.1	ATP synthase F0 subunit B [synthetic bacterium JCVI-Syn3.0]	40.3315	23	182	38000000000	3.52675e+09	3.62528e+09	3.58734e+09	3.58734e+09	4.85602e+09	5.38463e+09	3.8559e+09	4.85602e+09	4.41766e+09	4.32175e+09	4.42469e+09	4.41766e+09	0.00234734	0.0029773	0.00274396	180.811	229.335	211.362
AOE93605.1	F0F1 ATP synthase subunit A [synthetic bacterium JCVI-Syn3.0]	16.7247	14	288	1500000000	1.67498e+08	1.70972e+08	1.60868e+08	1.67498e+08	1.72813e+08	1.72881e+08	1.59643e+08	1.72813e+08	1.71893e+08	1.61597e+08	1.61836e+08	1.61836e+08	0.000109601	0.000105954	0.000100522	8.44233	8.16145	7.74302
AOE93606.1	hypothetical protein JCVSYN2_02190 [synthetic bacterium JCVI-Syn3.0]	4.54545	1	133	1200000000	1.75911e+08	1.65144e+08	1.69292e+08	1.69292e+08	8.30839e+07	9.99672e+07	1.7408e+08	9.99672e+07	1.21548e+08	1.10912e+08	1.00061e+08	1.10912e+08	0.000110775	6.12915e-05	6.8891e-05	8.53274	4.72116	5.30654
AOE93607.1	uracil phosphoribosyltransferase [synthetic bacterium JCVI-Syn3.0]	87.9227	186	208	120000000000	7.19155e+09	7.13255e+09	7.36984e+09	7.19155e+09	1.45863e+10	1.53206e+10	1.23722e+10	1.45863e+10	1.72228e+10	1.93406e+10	1.94636e+10	1.93406e+10	0.00470573	0.00894308	0.0120131	362.473	688.868	925.347
AOE93608.1	serine hydroxymethyltransferase [synthetic bacterium JCVI-Syn3.0]	64.6489	66	414	34000000000	3.34361e+09	3.6105e+09	3.52223e+09	3.52223e+09	4.01709e+09	3.64905e+09	4.00907e+09	4.00907e+09	3.90456e+09	4.19557e+09	3.74832e+09	3.90456e+09	0.00230474	0.00245803	0.00242526	177.53	189.337	186.813
AOE93609.1	ribose 5-phosphate isomerase B [synthetic bacterium JCVI-Syn3.0]	61.2245	42	148	39000000000	4.09817e+09	3.85753e+09	4.10383e+09	4.09817e+09	3.93405e+09	4.08122e+09	4.41455e+09	4.08122e+09	4.68142e+09	5.02499e+09	4.80423e+09	4.80423e+09	0.0026816	0.00250226	0.00298408	206.558	192.744	229.857
AOE93610.1	DNA-directed RNA polymerase subunit beta' [synthetic bacterium JCVI-Syn3.0]	65.7371	373	1256	100000000000	1.07255e+10	1.09885e+10	1.08411e+10	1.08411e+10	1.14798e+10	1.16259e+10	1.03295e+10	1.14798e+10	1.13027e+10	1.14512e+10	1.12559e+10	1.13027e+10	0.00709376	0.00703842	0.00702049	546.418	542.156	540.775
AOE93611.1	DNA-directed RNA polymerase subunit beta [synthetic bacterium JCVI-Syn3.0]	58.0945	376	1292	95000000000	1.06143e+10	1.04552e+10	1.04985e+10	1.04985e+10	1.01972e+10	1.06775e+10	1.01424e+10	1.01972e+10	1.06529e+10	1.06965e+10	1.10654e+10	1.06965e+10	0.00686962	0.00625209	0.00664397	529.153	481.586	511.772
AOE93612.1	hypothetical protein JCVSYN2_02220 [synthetic bacterium JCVI-Syn3.0]	28.133	16	392	5200000000	5.43043e+08	5.46219e+08	5.31455e+08	5.43043e+08	5.07045e+08	6.1465e+08	5.84017e+08	5.84017e+08	6.00667e+08	6.29842e+08	6.43063e+08	6.29842e+08	0.000355335	0.00035807	0.000391217	27.3708	27.5814	30.1346
AOE93613.1	50S ribosomal protein L7/L12 [synthetic bacterium JCVI-Syn3.0]	100	246	123	140000000000	1.51768e+10	1.52747e+10	1.43586e+10	1.51768e+10	1.89825e+10	1.71155e+10	1.48063e+10	1.71155e+10	1.46671e+10	1.49034e+10	1.47152e+10	1.47152e+10	0.00993079	0.0104938	0.0091401	764.949	808.313	704.044
AOE93614.1	50S ribosomal protein L10 [synthetic bacterium JCVI-Syn3.0]	42.4242	72	166	50000000000	6.4008e+09	5.44921e+09	5.6166e+09	5.6166e+09	7.37064e+09	4.64819e+09	5.75578e+09	5.75578e+09	4.63782e+09	5.09708e+09	5.02389e+09	5.02389e+09	0.00367517	0.00352896	0.00312051	283.091	271.829	240.367
AOE93615.1	50S ribosomal protein L1 [synthetic bacterium JCVI-Syn3.0]	76.9912	107	227	130000000000	1.3109e+10	1.30531e+10	1.2913e+10	1.30531e+10	1.50967e+10	1.55123e+10	1.41446e+10	1.50967e+10	1.58647e+10	1.43258e+10	1.59807e+10	1.58647e+10	0.00854116	0.00925603	0.00985413	657.908	712.973	759.044
AOE93616.1	50S ribosomal protein L11 [synthetic bacterium JCVI-Syn3.0]	78.169	128	143	180000000000	1.78677e+10	1.91054e+10	1.87784e+10	1.87784e+10	2.3317e+10	2.32513e+10	1.94379e+10	2.32513e+10	1.94657e+10	1.91832e+10	1.95934e+10	1.94657e+10	0.0122875	0.0142558	0.0120908	946.479	1098.09	931.332
AOE93617.1	UDP-glucose 4-epimerase GalE [synthetic bacterium JCVI-Syn3.0]	71.0843	40	333	17000000000	1.7619e+09	1.70594e+09	1.62369e+09	1.70594e+09	1.88161e+09	1.9649e+09	1.77191e+09	1.88161e+09	2.02499e+09	1.98411e+09	2.28095e+09	2.02499e+09	0.00111626	0.00115365	0.00125779	85.9836	88.8632	96.885
AOE93618.1	UDP-galactopyranose mutase [synthetic bacterium JCVI-Syn3.0]	50.3797	55	396	18000000000	1.58342e+09	1.55681e+09	1.5546e+09	1.55681e+09	2.11179e+09	2.23479e+09	2.04212e+09	2.11179e+09	2.3193e+09	2.24933e+09	2.34785e+09	2.3193e+09	0.00101869	0.00129477	0.0014406	78.4673	99.7335	110.966
AOE93619.1	DNA-binding protein WhiA [synthetic bacterium JCVI-Syn3.0]	50.4854	33	310	4500000000	5.33562e+08	5.2508e+08	5.22905e+08	5.2508e+08	4.53503e+08	4.21945e+08	5.43931e+08	4.53503e+08	4.92926e+08	5.03449e+08	5.02698e+08	5.02698e+08	0.000343581	0.00027805	0.000312243	26.4654	21.4176	24.0515
AOE93620.1	diacylglyceryl transferase [synthetic bacterium JCVI-Syn3.0]	19.7479	23	477	7200000000	1.02017e+09	1.08742e+09	1.09537e+09	1.08742e+09	6.204e+08	4.9939e+08	7.5647e+08	6.204e+08	7.58662e+08	7.1318e+08	6.48936e+08	7.1318e+08	0.000711543	0.000380377	0.000442981	54.8087	29.2997	34.1219
AOE93621.1	thioredoxin-disulfide reductase [synthetic bacterium JCVI-Syn3.0]	55.8065	45	311	18000000000	2.03316e+09	1.94909e+09	1.98982e+09	1.98982e+09	2.01889e+09	1.91908e+09	1.96833e+09	1.96833e+09	2.02321e+09	2.02449e+09	2.07392e+09	2.02449e+09	0.00130202	0.00120681	0.00125748	100.292	92.9583	96.8613
AOE93622.1	diacylglyceryl transferase [synthetic bacterium JCVI-Syn3.0]	16.5399	10	527	1900000000	2.54945e+08	2.5251e+08	2.60115e+08	2.54945e+08	1.62267e+08	1.80288e+08	2.11403e+08	1.80288e+08	1.93715e+08	1.94325e+08	1.90431e+08	1.93715e+08	0.000166821	0.000110537	0.000120323	12.8499	8.51447	9.26825
AOE93623.1	HPr(Ser) kinase/phosphatase [synthetic bacterium JCVI-Syn3.0]	50.1597	39	314	26000000000	2.63111e+09	2.5937e+09	2.50454e+09	2.5937e+09	2.80603e+09	2.86338e+09	2.65299e+09	2.80603e+09	3.14319e+09	3.17979e+09	3.62527e+09	3.17979e+09	0.00169716	0.00172042	0.00197508	130.729	132.521	152.136
AOE93624.1	ECF transporter S component [synthetic bacterium JCVI-Syn3.0]	4.01786	1	225	52000000	9.63453e+06	4.98226e+06	5.96535e+06	5.96535e+06	6.07519e+06	3.86467e+06	6.83328e+06	6.07519e+06	4.94072e+06	4.86402e+06	4.83998e+06	4.86402e+06	3.90337e-06	3.7248e-06	3.02121e-06	0.300669	0.286914	0.232718
AOE93625.1	dihydrofolate synthase [synthetic bacterium JCVI-Syn3.0]	34.7709	23	372	5400000000	6.85579e+08	7.10396e+08	6.82137e+08	6.85579e+08	4.96645e+08	5.8041e+08	5.47777e+08	5.47777e+08	5.54928e+08	5.56182e+08	5.85945e+08	5.56182e+08	0.000448603	0.000335851	0.000345464	34.555	25.8699	26.6104
AOE93626.1	excinuclease ABC subunit A [synthetic bacterium JCVI-Syn3.0]	62.5793	117	947	24000000000	2.85734e+09	2.94171e+09	2.85577e+09	2.85734e+09	2.41409e+09	2.54276e+09	2.39735e+09	2.41409e+09	2.62286e+09	2.67238e+09	2.69572e+09	2.67238e+09	0.00186967	0.00148012	0.00165991	144.017	114.01	127.86
AOE93627.1	excinuclease ABC subunit B [synthetic bacterium JCVI-Syn3.0]	34.4361	56	666	8800000000	9.67993e+08	9.65841e+08	9.06491e+08	9.65841e+08	8.83055e+08	9.03224e+08	1.01452e+09	9.03224e+08	1.05086e+09	1.08996e+09	1.01805e+09	1.05086e+09	0.000631989	0.000553781	0.000652725	48.6809	42.6566	50.2781
AOE93628.1	DNA polymerase III subunit delta [synthetic bacterium JCVI-Syn3.0]	31.0127	16	317	1400000000	1.63655e+08	1.58923e+08	1.60922e+08	1.60922e+08	1.1389e+08	1.60792e+08	1.59708e+08	1.59708e+08	1.44004e+08	1.66037e+08	1.72068e+08	1.66037e+08	0.000105298	9.79192e-05	0.000103132	8.11087	7.54252	7.94402
AOE93629.1	hypothetical protein JCVSYN2_02305 [synthetic bacterium JCVI-Syn3.0]	31.1475	39	489	31000000000	4.21952e+09	4.20038e+09	4.16936e+09	4.20038e+09	3.11962e+09	2.85044e+09	3.2253e+09	3.11962e+09	3.12608e+09	3.15775e+09	2.93155e+09	3.12608e+09	0.00274848	0.00191269	0.00194171	211.71	147.331	149.566
AOE93630.1	hypothetical protein JCVSYN2_02315 [synthetic bacterium JCVI-Syn3.0]	9.30233	1	87	1200000000	1.74563e+08	1.50208e+08	1.47629e+08	1.50208e+08	1.23045e+08	7.86982e+07	1.97538e+08	1.23045e+08	1.32563e+08	1.05843e+08	8.99115e+07	1.05843e+08	9.82876e-05	7.54409e-05	6.57427e-05	7.57089	5.81106	5.06403
AOE93631.1	phosphoribosylpyrophosphate synthetase [synthetic bacterium JCVI-Syn3.0]	63.3721	137	345	59000000000	6.0171e+09	6.25564e+09	6.267e+09	6.25564e+09	6.7537e+09	6.23349e+09	6.21859e+09	6.23349e+09	6.95428e+09	7.38078e+09	6.91943e+09	6.95428e+09	0.00409332	0.00382185	0.00431954	315.3	294.39	332.726
AOE93632.1	aminoacyl-tRNA hydrolase [synthetic bacterium JCVI-Syn3.0]	76.8817	34	187	27000000000	3.01192e+09	2.93564e+09	3.06534e+09	3.01192e+09	2.83051e+09	2.9381e+09	2.95035e+09	2.9381e+09	3.11662e+09	3.05406e+09	3.09746e+09	3.09746e+09	0.00197082	0.00180139	0.00192394	151.809	138.758	148.197
AOE93633.1	50S ribosomal protein L9 [synthetic bacterium JCVI-Syn3.0]	53.7415	29	148	26000000000	2.79216e+09	2.33063e+09	2.41374e+09	2.41374e+09	3.2126e+09	3.05045e+09	3.24682e+09	3.2126e+09	2.83244e+09	3.0891e+09	3.03207e+09	3.03207e+09	0.00157941	0.00196969	0.00188332	121.659	151.722	145.069
AOE93634.1	replicative DNA helicase [synthetic bacterium JCVI-Syn3.0]	56.621	75	439	23000000000	2.49143e+09	2.30292e+09	2.33541e+09	2.33541e+09	2.62623e+09	2.65235e+09	2.46869e+09	2.62623e+09	2.6889e+09	2.59716e+09	2.83691e+09	2.6889e+09	0.00152815	0.00161018	0.00167017	117.711	124.029	128.65
AOE93635.1	lipoprotein [synthetic bacterium JCVI-Syn3.0]	69.6552	68	436	48000000000	5.88932e+09	6.14388e+09	5.72046e+09	5.88932e+09	5.07657e+09	4.68958e+09	5.22145e+09	5.07657e+09	5.63134e+09	4.89331e+09	4.73408e+09	4.89331e+09	0.00385362	0.00311253	0.00303941	296.837	239.752	234.119
AOE93636.1	hypothetical protein JCVSYN2_02350 [synthetic bacterium JCVI-Syn3.0]	11.3636	3	309	120000000	1.90411e+07	1.95452e+07	1.77137e+07	1.90411e+07	7.86732e+06	9.88276e+06	1.40996e+07	9.88276e+06	1.07923e+07	1.06042e+07	1.04538e+07	1.06042e+07	1.24594e-05	6.05927e-06	6.58664e-06	0.959723	0.466734	0.507356
AOE93637.1	cysteine--tRNA ligase [synthetic bacterium JCVI-Syn3.0]	29.4785	33	442	22000000000	2.20968e+09	2.2388e+09	2.19664e+09	2.20968e+09	2.571e+09	2.82915e+09	2.36836e+09	2.571e+09	2.48908e+09	2.465e+09	2.63229e+09	2.48908e+09	0.00144589	0.00157632	0.00154605	111.374	121.421	119.089
AOE93638.1	23S rRNA (guanosine(2251)-2'-O)-methyltransferase RlmB [synthetic bacterium JCVI-Syn3.0]	56.1475	24	245	22000000000	2.68013e+09	2.66578e+09	2.7623e+09	2.68013e+09	2.109e+09	2.20111e+09	2.37165e+09	2.20111e+09	2.36057e+09	2.40153e+09	2.44794e+09	2.40153e+09	0.00175372	0.00134954	0.00149167	135.085	103.952	114.901
AOE93639.1	50S ribosomal protein L33 [synthetic bacterium JCVI-Syn3.0]	47.1698	7	54	6200000000	6.93789e+08	6.16167e+08	6.75372e+08	6.75372e+08	5.38235e+08	5.42191e+08	6.85975e+08	5.42191e+08	7.07102e+08	1.02656e+09	7.14609e+08	7.14609e+08	0.000441923	0.000332425	0.000443868	34.0405	25.6061	34.1903
AOE93640.1	preprotein translocase subunit SecE [synthetic bacterium JCVI-Syn3.0]	26.1682	5	108	1300000000	1.67965e+08	1.66563e+08	1.82952e+08	1.67965e+08	1.35466e+08	1.3716e+08	1.51033e+08	1.3716e+08	1.19215e+08	1.23855e+08	1.1579e+08	1.19215e+08	0.000109907	8.40952e-05	7.40485e-05	8.46589	6.47768	5.70381
AOE93641.1	antitermination protein NusG [synthetic bacterium JCVI-Syn3.0]	59.1549	46	214	39000000000	4.63603e+09	4.81818e+09	4.72352e+09	4.72352e+09	3.66461e+09	3.73623e+09	4.58496e+09	3.73623e+09	4.34471e+09	4.37026e+09	4.12151e+09	4.34471e+09	0.00309079	0.00229074	0.00269865	238.077	176.451	207.871
AOE93644.1	hypothetical protein JCVSYN2_02390 [synthetic bacterium JCVI-Syn3.0]	38.4937	16	240	1500000000	1.46293e+08	1.43608e+08	1.40324e+08	1.43608e+08	1.66131e+08	1.7317e+08	1.66027e+08	1.66131e+08	1.80142e+08	1.80034e+08	2.0427e+08	1.80142e+08	9.39687e-05	0.000101858	0.000111893	7.23822	7.8459	8.61887
AOE93645.1	DNA topoisomerase I [synthetic bacterium JCVI-Syn3.0]	62.3277	84	654	39000000000	3.54277e+09	3.44294e+09	3.47514e+09	3.47514e+09	4.72476e+09	4.57383e+09	4.62277e+09	4.62277e+09	4.95216e+09	4.74338e+09	4.92225e+09	4.92225e+09	0.00227393	0.00283429	0.00305738	175.156	218.32	235.504
AOE93646.1	C4-dicarboxylate ABC transporter [synthetic bacterium JCVI-Syn3.0]	11.7347	10	589	3400000000	4.82215e+08	4.82593e+08	4.69783e+08	4.82215e+08	2.51953e+08	2.99729e+08	3.61217e+08	2.99729e+08	3.33275e+08	3.57612e+08	3.61622e+08	3.57612e+08	0.000315533	0.000183769	0.000222125	24.3049	14.1553	17.1099
AOE93647.1	redox-regulated ATPase YchF [synthetic bacterium JCVI-Syn3.0]	56.3187	33	365	27000000000	3.34964e+09	3.33009e+09	3.26464e+09	3.33009e+09	2.80208e+09	2.94647e+09	2.93044e+09	2.93044e+09	2.59321e+09	2.86775e+09	2.91569e+09	2.86775e+09	0.00217901	0.0017967	0.00178126	167.845	138.396	137.207
AOE93649.1	16S rRNA (guanine(527)-N(7))-methyltransferase RsmG [synthetic bacterium JCVI-Syn3.0]	59.3074	32	232	23000000000	2.60049e+09	2.60396e+09	2.67031e+09	2.60396e+09	2.58676e+09	2.48162e+09	2.46431e+09	2.48162e+09	2.61317e+09	2.53825e+09	2.44114e+09	2.53825e+09	0.00170388	0.00152152	0.00157659	131.246	117.199	121.442
AOE93650.1	CDP-diacylglycerol--glycerol-3-phosphate 3-phosphatidyltransferase [synthetic bacterium JCVI-Syn3.0]	20.7071	10	199	5400000000	7.39329e+08	7.1785e+08	6.80563e+08	7.1785e+08	4.61885e+08	4.36396e+08	6.24694e+08	4.61885e+08	6.05497e+08	6.09222e+08	5.24563e+08	6.05497e+08	0.000469718	0.000283189	0.000376095	36.1815	21.8135	28.9699
AOE93651.1	amino acid permease [synthetic bacterium JCVI-Syn3.0]	11.2167	15	527	8000000000	1.05118e+09	8.96092e+08	9.05939e+08	9.05939e+08	8.8006e+08	9.11349e+08	8.00781e+08	8.8006e+08	8.42314e+08	8.63471e+08	8.48811e+08	8.48811e+08	0.000592793	0.000539579	0.000527226	45.6616	41.5627	40.6111
AOE93652.1	hypothetical protein JCVSYN2_02430 [synthetic bacterium JCVI-Syn3.0]	7.9646	4	227	1100000000	1.78143e+08	2.03353e+08	1.73515e+08	1.78143e+08	9.35923e+07	6.21013e+07	1.56779e+08	9.35923e+07	9.11718e+07	8.23083e+07	5.90365e+07	8.23083e+07	0.000116566	5.73829e-05	5.11245e-05	8.97886	4.42009	3.93802
AOE93653.1	amino acid permease [synthetic bacterium JCVI-Syn3.0]	8.98438	7	513	880000000	1.46204e+08	1.33578e+08	1.4144e+08	1.4144e+08	4.8331e+07	6.60477e+07	1.00912e+08	6.60477e+07	7.27871e+07	8.48059e+07	8.5895e+07	8.48059e+07	9.25499e-05	4.04949e-05	5.26759e-05	7.12893	3.11924	4.05752
AOE93654.1	magnesium transporter [synthetic bacterium JCVI-Syn3.0]	31.8644	46	886	12000000000	1.6154e+09	1.59665e+09	1.57845e+09	1.59665e+09	1.11825e+09	1.16959e+09	1.23555e+09	1.16959e+09	1.21207e+09	1.21761e+09	1.25643e+09	1.21761e+09	0.00104475	0.000717093	0.000756301	80.4753	55.2362	58.2564
AOE93655.1	MFS transporter [synthetic bacterium JCVI-Syn3.0]	6.52632	10	476	5000000000	6.64478e+08	6.80732e+08	6.08916e+08	6.64478e+08	4.96992e+08	4.16505e+08	5.7481e+08	4.96992e+08	4.90669e+08	5.31764e+08	5.35132e+08	5.31764e+08	0.000434795	0.000304714	0.000330297	33.4914	23.4715	25.4421
AOE93656.1	tRNA uridine(34) 5-carboxymethylaminomethyl synthesis enzyme MnmG [synthetic bacterium JCVI-Syn3.0]	60.7313	79	630	22000000000	2.76137e+09	2.89307e+09	2.78805e+09	2.78805e+09	3.44411e+09	3.20792e+09	3.21713e+09	3.21713e+09	1.3158e+09	1.25556e+09	1.117e+09	1.25556e+09	0.00182433	0.00197247	0.000779871	140.525	151.936	60.0719
AOE93657.1	DAACS family amino acid transporter [synthetic bacterium JCVI-Syn3.0]	17.5238	15	526	7500000000	8.65363e+08	9.25058e+08	8.49396e+08	8.65363e+08	6.04206e+08	5.71023e+08	9.40858e+08	6.04206e+08	1.0108e+09	9.25819e+08	8.07477e+08	9.25819e+08	0.000566242	0.000370448	0.000575058	43.6165	28.5349	44.2956
AOE93658.1	NADH oxidase [synthetic bacterium JCVI-Syn3.0]	53.4676	57	448	26000000000	2.54631e+09	2.35955e+09	2.5166e+09	2.5166e+09	3.10806e+09	3.0168e+09	3.03697e+09	3.03697e+09	3.0424e+09	3.21891e+09	3.15441e+09	3.15441e+09	0.00164671	0.00186201	0.00195932	126.843	143.427	150.922
AOE93659.1	hypothetical protein JCVSYN2_02465 [synthetic bacterium JCVI-Syn3.0]	45.7983	29	239	13000000000	1.42223e+09	1.49733e+09	1.58148e+09	1.49733e+09	1.49581e+09	1.14489e+09	1.50144e+09	1.49581e+09	1.55334e+09	1.45638e+09	1.34712e+09	1.45638e+09	0.000979766	0.000917102	0.000904607	75.4694	70.6425	69.6801
AOE93660.1	hypothetical protein JCVSYN2_02470 [synthetic bacterium JCVI-Syn3.0]	41.2879	13	265	6300000000	5.93346e+08	5.96263e+08	5.77809e+08	5.93346e+08	5.97725e+08	7.05292e+08	7.92229e+08	7.05292e+08	7.7761e+08	8.50087e+08	8.09639e+08	8.09639e+08	0.000388251	0.000432425	0.000502895	29.9062	33.3089	38.737
AOE93661.1	membrane protein insertase YidC [synthetic bacterium JCVI-Syn3.0]	22.2222	24	397	18000000000	2.64091e+09	2.37948e+09	2.35351e+09	2.37948e+09	1.30168e+09	1.38793e+09	2.13581e+09	1.38793e+09	2.16917e+09	1.86608e+09	1.76543e+09	1.86608e+09	0.00155699	0.00085096	0.00115909	119.932	65.5478	89.282
AOE93662.1	ribonuclease P protein component [synthetic bacterium JCVI-Syn3.0]	42.2018	7	110	980000000	1.25104e+08	1.26799e+08	1.15583e+08	1.25104e+08	8.37056e+07	8.87088e+07	1.19677e+08	8.87088e+07	1.22124e+08	1.04101e+08	9.41987e+07	1.04101e+08	8.18604e-05	5.43888e-05	6.46609e-05	6.30554	4.18946	4.9807
AOE93665.1	tetracycline resistance ribosomal protection protein Tet(M) [synthetic bacterium JCVI-Syn3.0]	64.6322	108	640	31000000000	4.54418e+09	4.38603e+09	4.50387e+09	4.50387e+09	3.01334e+09	3.06794e+09	2.90511e+09	3.01334e+09	2.70181e+09	2.88885e+09	2.98886e+09	2.88885e+09	0.00294707	0.00184753	0.00179436	227.007	142.311	138.216
AOE93667.1	serine/threonine protein kinase [synthetic bacterium JCVI-Syn3.0]	8.3558	2	372	160000000	1.73959e+07	1.42308e+07	1.75668e+07	1.73959e+07	1.90846e+07	1.99074e+07	1.53958e+07	1.90846e+07	1.85258e+07	1.74151e+07	2.04777e+07	1.85258e+07	1.13829e-05	1.17011e-05	1.1507e-05	0.876799	0.90131	0.886365
AOE93668.1	hypothetical protein JCVSYN2_00695 [synthetic bacterium JCVI-Syn3.0]	39.1791	13	269	1700000000	2.27679e+08	2.61181e+08	2.6047e+08	2.6047e+08	2.24242e+08	2.28544e+08	2.58978e+08	2.28544e+08	9.30854e+07	7.68002e+07	6.90201e+07	7.68002e+07	0.000170436	0.000140124	4.77033e-05	13.1284	10.7935	3.67449
AOE93669.1	RNA-binding protein [synthetic bacterium JCVI-Syn3.0]	48.3871	17	94	8200000000	1.05319e+09	1.05825e+09	1.07535e+09	1.05825e+09	9.12686e+08	9.27338e+08	8.29756e+08	9.12686e+08	7.79697e+08	7.83144e+08	7.80596e+08	7.80596e+08	0.000692457	0.000559582	0.000484855	53.3386	43.1035	37.3474
AOE93670.1	hypothetical protein JCVSYN2_01445 [synthetic bacterium JCVI-Syn3.0]	53.1088	48	387	7500000000	9.94455e+08	1.0022e+09	1.00451e+09	1.0022e+09	6.64814e+08	7.15304e+08	8.70416e+08	7.15304e+08	7.45126e+08	7.78851e+08	7.24323e+08	7.45126e+08	0.000655779	0.000438564	0.000462824	50.5133	33.7817	35.6504
AOE93671.1	hypothetical protein JCVSYN2_01575 [synthetic bacterium JCVI-Syn3.0]	43.609	42	400	18000000000	1.56053e+09	1.6324e+09	1.53403e+09	1.56053e+09	2.14822e+09	2.14002e+09	2.05196e+09	2.14002e+09	2.33197e+09	2.29132e+09	2.30955e+09	2.30955e+09	0.00102112	0.00131208	0.00143454	78.6548	101.067	110.5
					Sum:	1.52282e+12	1.53456e+12	1.53162e+12	1.52826e+12	1.66724e+12	1.63351e+12	1.57002e+12	1.63101e+12	1.60242e+12	1.60913e+12	1.61173e+12	1.60996e+12	1	1	1	77028	77028	77028
