# Supplementary material for: Essential metabolism for a minimal cell
Source: eLife. 2019 Jan 18;8:e36842. doi: 10.7554/eLife.36842 (PMC6609329; doi:10.7554/eLife.36842)
Supplement: Supplementary file 6. [file elife-36842-supp6.xlsx]

## Sheet: Model comparison
Reaction ID (syn3A)	Reaction ID (MPN)	Where	Equation	Reversible (syn3A)	Reversible (MPN)	Boundary	Transport	Gapfill (Syn3A)	Gapfill (MPN)	Mass balanced (syn3A)	Mass balanced (MPN)	Gene-protein-reaction (syn3A)	Gene-protein-reaction (MPN)
BPNT	IR03510	Both	H2O + Adenosine 3',5'-bisphosphate → Orthophosphate + AMP	✗	✗	✗	✗	✗	✓	✓	✓	MMSYN1_0139
METTRS	IR09893	Both	ATP + L-Methionine + tRNA(Met) → Diphosphate + AMP + L-Methionyl-tRNA	✗	✗	✗	✗	✗	✗	✓	✗	MMSYN1_0012	MPN023
SERTRS	IR09907	Both	ATP + L-Serine + tRNA(Ser) → Diphosphate + AMP + L-Seryl-tRNA(Ser)	✗	✗	✗	✗	✗	✗	✓	✗	MMSYN1_0061	MPN005
LYSTRS	IR09906	Both	ATP + L-Lysine + tRNA(Lys) → Diphosphate + AMP + L-Lysyl-tRNA	✗	✗	✗	✗	✗	✗	✓	✗	MMSYN1_0064	MPN277
ASNTRS	IR09910	Both	ATP + L-Asparagine + tRNA(Asn) → Diphosphate + AMP + L-Asparaginyl-tRNA(Asn)	✗	✗	✗	✗	✗	✗	✓	✗	MMSYN1_0076	MPN252
GLUTRS	IR04284	Both	ATP + L-Glutamate + tRNA(Glu) → Diphosphate + AMP + L-Glutamyl-tRNA(Glu)	✗	✗	✗	✗	✗	✗	✓	✓	MMSYN1_0126	MPN678
GLUTRS_Gln	IR09911	Both	ATP + L-Glutamate + tRNA(Gln) → Diphosphate + AMP + L-Glutamyl-tRNA(Gln)	✗	✗	✗	✗	✗	✗	✓	✓	MMSYN1_0126	MPN678
ALATRS	IR09891	Both	ATP + L-Alanine + tRNA(Ala) → Diphosphate + AMP + L-Alanyl-tRNA	✗	✗	✗	✗	✗	✗	✓	✗	MMSYN1_0163	MPN418
THRTRS	IR09901	Both	ATP + L-Threonine + tRNA(Thr) → Diphosphate + AMP + L-Threonyl-tRNA(Thr)	✗	✗	✗	✗	✗	✗	✓	✗	MMSYN1_0222	MPN553
VALTRS	IR09902	Both	ATP + L-Valine + tRNA(Val) → Diphosphate + AMP + L-Valyl-tRNA(Val)	✗	✗	✗	✗	✗	✗	✓	✗	MMSYN1_0260	MPN480
PROTRS	IR09896	Both	ATP + L-Proline + tRNA(Pro) → Diphosphate + AMP + L-Prolyl-tRNA(Pro)	✗	✗	✗	✗	✗	✗	✓	✗	MMSYN1_0282	MPN402
ASPTRS	IR09894	Both	ATP + L-Aspartate + tRNA(Asp) → Diphosphate + AMP + L-Aspartyl-tRNA(Asp)	✗	✗	✗	✗	✗	✗	✓	✓	MMSYN1_0287	MPN046
HISTRS	IR09892	Both	ATP + L-Histidine + tRNA(His) → Diphosphate + AMP + L-Histidyl-tRNA(His)	✗	✗	✗	✗	✗	✗	✓	✗	MMSYN1_0288	MPN045
TRPTRS	IR09900	Both	ATP + L-Tryptophan + tRNA(Trp) → Diphosphate + AMP + L-Tryptophanyl-tRNA(Trp)	✗	✗	✗	✗	✗	✗	✓	✗	MMSYN1_0308	MPN265
GLYTRS	IR09899	Both	ATP + Glycine + tRNA(Gly) → Diphosphate + AMP + Glycyl-tRNA(Gly)	✗	✗	✗	✗	✗	✗	✓	✗	MMSYN1_0405	MPN354
ILETRS	IR09905	Both	ATP + L-Isoleucine + tRNA(Ile) → Diphosphate + AMP + L-Isoleucyl-tRNA(Ile)	✗	✗	✗	✗	✗	✗	✓	✗	MMSYN1_0519	MPN520
PHETRS	IR09908	Both	ATP + L-Phenylalanine + tRNA(Phe) → Diphosphate + AMP + L-Phenylalanyl-tRNA(Phe)	✗	✗	✗	✗	✗	✗	✓	✗	MMSYN1_0528 and MMSYN1_0529	MPN105 and MPN106
ARGTRS	IR09904	Both	ATP + L-Arginine + tRNA(Arg) → Diphosphate + AMP + L-Arginyl-tRNA(Arg)	✗	✗	✗	✗	✗	✗	✓	✗	MMSYN1_0535	MPN556
TYRTRS	IR09895	Both	ATP + L-Tyrosine + tRNA(Tyr) → Diphosphate + AMP + L-Tyrosyl-tRNA(Tyr)	✗	✗	✗	✗	✗	✗	✓	✗	MMSYN1_0613	MPN669
LEUTRS	IR09898	Both	ATP + L-Leucine + tRNA(Leu) → Diphosphate + AMP + L-Leucyl-tRNA	✗	✗	✗	✗	✗	✗	✓	✗	MMSYN1_0634	MPN384
GLNTRAT	IR09913	Both	H2O + ATP + L-Glutamine + L-Glutamyl-tRNA(Gln) → ADP + Orthophosphate + L-Glutamate + H+ + Glutaminyl-tRNA	✗	✗	✗	✗	✗	✗	✓	✗	MMSYN1_0687 and MMSYN1_0688 and MMSYN1_0689	MPN236 and MPN237 and MPN238
GLNTRAT2	IR09912	Both	H2O + ATP + L-Asparagine + L-Glutamyl-tRNA(Gln) → ADP + Orthophosphate + L-Aspartate + H+ + Glutaminyl-tRNA	✗	✗	✗	✗	✗	✗	✓	✗	MMSYN1_0687 and MMSYN1_0688 and MMSYN1_0689	MPN236 and MPN237 and MPN238
CYSTRS	IR09903	Both	ATP + L-Cysteine + tRNA(Cys) → Diphosphate + AMP + L-Cysteinyl-tRNA(Cys)	✗	✗	✗	✗	✗	✗	✓	✗	MMSYN1_0837	MPN356
AHCi	IR03514	Both	H2O + S-Adenosyl-L-homocysteine → L-Homocysteine + Adenosine	✗	✗	✗	✗	✗	✓	✓	✓	MMSYN1_0381
MAT	IR07876	Both	H2O + ATP + L-Methionine → Orthophosphate + Diphosphate + S-Adenosyl-L-methionine	✗	✗	✗	✗	✗	✗	✓	✓	MMSYN1_0432	MPN060
NADHK	IR00075	Both	ATP + NADH → NADPH + ADP + H+	✗	✗	✗	✗	✗	✗	✓	✗	MMSYN1_0259	MPN267
NADK	IR00074	Both	ATP + NAD+ → NADP+ + ADP + H+	✗	✗	✗	✗	✗	✗	✓	✗	MMSYN1_0259	MPN267
FMNAT	IR00114	Both	ATP + FMN + H+ → Diphosphate + FAD	✗	✗	✗	✗	✗	✗	✓	✗	MMSYN1_0291	MPN158
RBFK	IR00293	Both	ATP + Riboflavin → ADP + FMN + H+	✗	✗	✗	✗	✗	✗	✓	✗	MMSYN1_0291	MPN158
NADS	IR03511	Both	ATP + Ammonia + Deamino-NAD+ → NAD+ + Diphosphate + AMP	✗	✗	✗	✗	✗	✗	✓	✓	MMSYN1_0378	MPN562
NNATr	RR03873	Both	ATP + H+ + Nicotinate D-ribonucleotide ⇄ Diphosphate + Deamino-NAD+	✗	✓	✗	✗	✗	✗	✓	✗	MMSYN1_0380	MPN336
PGPP	IR09828	Both	H2O + Phosphatidylglycerophosphate → Orthophosphate + Phosphatidylglycerol	✗	✗	✗	✗	✗	✓	✓	✓	MMSYN1_0214
GLYK	IR00522	Both	ATP + Glycerol → ADP + H+ + sn-Glycerol 3-phosphate	✗	✗	✗	✗	✗	✗	✓	✗	MMSYN1_0218	MPN050
DASYN	IR09826	Both	CTP + H+ + Phosphatidate → Diphosphate + CDP-diacylglycerol	✗	✗	✗	✗	✗	✗	✓	✗	MMSYN1_0304	MPN637
AGPAT	IR09822	Both	Acyl-[acyl-carrier protein] + 1-Acyl-sn-glycerol 3-phosphate → Acyl-carrier protein + Phosphatidate	✗	✗	✗	✗	✗	✗	✓	✗	MMSYN1_0512	MPN299
ACPS	IR04278	Both	CoA + Apo-[acyl-carrier-protein] → Adenosine 3',5'-bisphosphate + H+ + Acyl-carrier protein	✗	✗	✗	✗	✗	✗	✓	✗	MMSYN1_0513 and MMSYN1_0621	MPN298
PGSA	IR09827	Both	sn-Glycerol 3-phosphate + CDP-diacylglycerol → CMP + H+ + Phosphatidylglycerophosphate	✗	✗	✗	✗	✗	✗	✓	✗	MMSYN1_0875	MPN253
GALU	RR00146	Both	Diphosphate + UDP-glucose ⇄ UTP + H+ + D-Glucose 1-phosphate	✓	✓	✗	✗	✗	✗	✓	✗	MMSYN1_0115	MPN667
MAN6PI	RR00465	Both	D-Fructose 6-phosphate ⇄ D-Mannose 6-phosphate	✓	✓	✗	✗	✗	✓	✓	✓	MMSYN1_0435
PGMT	RR08939	Both	D-Glucose 6-phosphate ⇄ D-Glucose 1-phosphate	✓	✓	✗	✗	✗	✗	✓	✓	MMSYN1_0733	MPN066
PPM2	RR01592	Both	2-Deoxy-D-ribose 1-phosphate ⇄ 2-Deoxy-D-ribose 5-phosphate	✓	✓	✗	✗	✗	✗	✓	✓	MMSYN1_0733	MPN066
UDPG4E	RR00147	Both	UDP-glucose ⇄ UDP-alpha-D-galactose	✓	✓	✗	✗	✗	✗	✓	✓	MMSYN1_0813	MPN257
FBA	RR00690	Both	Glycerone phosphate + D-Glyceraldehyde 3-phosphate ⇄ D-Fructose 1,6-bisphosphate	✓	✓	✗	✗	✗	✗	✓	✓	MMSYN1_0131	MPN025
ENO	RR00362	Both	H2O + Phosphoenolpyruvate ⇄ 2-Phospho-D-glycerate	✓	✓	✗	✗	✗	✗	✓	✓	MMSYN1_0213	MPN606
PFK	IR00450	Both	ATP + D-Fructose 6-phosphate → ADP + H+ + D-Fructose 1,6-bisphosphate	✗	✗	✗	✗	✗	✗	✓	✗	MMSYN1_0220	MPN302
PYK	IR07898	Both	ADP + Phosphoenolpyruvate + H+ → ATP + Pyruvate	✗	✗	✗	✗	✗	✗	✓	✗	MMSYN1_0221	MPN303
PYK2	IR04740	Both	UDP + Phosphoenolpyruvate + H+ → Pyruvate + UTP	✗	✗	✗	✗	✗	✗	✓	✗	MMSYN1_0221	MPN303
PYK3	IR07938	Both	GDP + Phosphoenolpyruvate + H+ → Pyruvate + GTP	✗	✗	✗	✗	✗	✗	✓	✗	MMSYN1_0221	MPN303
PYK4	IR04690	Both	Phosphoenolpyruvate + H+ + CDP → Pyruvate + CTP	✗	✗	✗	✗	✗	✗	✓	✗	MMSYN1_0221	MPN303
PYK5	IR07969	Both	Phosphoenolpyruvate + H+ + dADP → Pyruvate + dATP	✗	✗	✗	✗	✗	✗	✓	✗	MMSYN1_0221	MPN303
PYK6	IR05416	Both	Phosphoenolpyruvate + H+ + dGDP → Pyruvate + dGTP	✗	✗	✗	✗	✗	✗	✓	✗	MMSYN1_0221	MPN303
PYK7	IR09792	Both	Phosphoenolpyruvate + H+ + dCDP → Pyruvate + dCTP	✗	✗	✗	✗	✗	✗	✓	✗	MMSYN1_0221	MPN303
PYK8	IR09793	Both	Phosphoenolpyruvate + H+ + dTDP → Pyruvate + dTTP	✗	✗	✗	✗	✗	✗	✓	✗	MMSYN1_0221	MPN303
PDH_E2	RR01487	Both	CoA + [Dihydrolipoyllysine-residue acetyltransferase] S-acetyldihydrolipoyllysine ⇄ Acetyl-CoA + Dihydrolipoylprotein	✗	✓	✗	✗	✗	✗	✓	✓	MMSYN1_0227	MPN391
PDH_E3	RR09342	Both	NAD+ + Dihydrolipoylprotein ⇄ NADH + H+ + Lipoylprotein	✗	✓	✗	✗	✗	✗	✓	✓	MMSYN1_0228	MPN390
PGI	RR00464	Both	D-Fructose 6-phosphate ⇄ D-Glucose 6-phosphate	✓	✓	✗	✗	✗	✗	✓	✓	MMSYN1_0445	MPN250
LDH_L	RR00404	Both	NAD+ + (S)-Lactate ⇄ NADH + Pyruvate + H+	✓	✓	✗	✗	✗	✗	✓	✓	MMSYN1_0475	MPN674
PGK	RR03675	Both	ATP + 3-Phospho-D-glycerate ⇄ ADP + 3-Phospho-D-glyceroyl phosphate	✓	✓	✗	✗	✗	✗	✓	✓	MMSYN1_0606	MPN429
PGK2	RR09795	Both	dATP + 3-Phospho-D-glycerate ⇄ dADP + 3-Phospho-D-glyceroyl phosphate	✓	✓	✗	✗	✗	✗	✓	✓	MMSYN1_0606	MPN429
PGK3	RR03680	Both	GDP + 3-Phospho-D-glyceroyl phosphate ⇄ GTP + 3-Phospho-D-glycerate	✓	✓	✗	✗	✗	✗	✓	✓	MMSYN1_0606	MPN429
PGK4	RR09796	Both	3-Phospho-D-glycerate + dGTP ⇄ 3-Phospho-D-glyceroyl phosphate + dGDP	✓	✓	✗	✗	✗	✗	✓	✓	MMSYN1_0606	MPN429
GAPD	RR00685	Both	NAD+ + Orthophosphate + D-Glyceraldehyde 3-phosphate ⇄ NADH + H+ + 3-Phospho-D-glyceroyl phosphate	✓	✓	✗	✗	✗	✗	✓	✓	MMSYN1_0607	MPN430
TPI	RR00652	Both	Glycerone phosphate ⇄ D-Glyceraldehyde 3-phosphate	✓	✓	✗	✗	✗	✗	✓	✓	MMSYN1_0727	MPN629
PGM	RR03681	Both	3-Phospho-D-glycerate ⇄ 2-Phospho-D-glycerate	✓	✓	✗	✗	✗	✗	✓	✓	MMSYN1_0729	MPN628
PDH_E1	IR00932	Both	Pyruvate + H+ + Lipoylprotein → CO2 + [Dihydrolipoyllysine-residue acetyltransferase] S-acetyldihydrolipoyllysine	✗	✗	✗	✗	✓	✗	✓	✗		MPN392 and MPN393
TMPK	RR01151	Both	ATP + dTMP ⇄ ADP + dTDP	✓	✓	✗	✗	✗	✗	✓	✓	MMSYN1_0045	MPN006
DURIK1	IR01156	Both	ATP + Deoxyuridine → ADP + H+ + dUMP	✗	✗	✗	✗	✗	✗	✓	✗	MMSYN1_0140	MPN044
TMDK1	IR03714	Both	ATP + Thymidine → ADP + H+ + dTMP	✗	✗	✗	✗	✗	✗	✓	✗	MMSYN1_0140	MPN044
DGK1	RR01147	Both	ATP + dGMP ⇄ ADP + dGDP	✓	✓	✗	✗	✗	✗	✓	✓	MMSYN1_0203	MPN246
GK1	RR00171	Both	ATP + GMP ⇄ ADP + GDP	✓	✓	✗	✗	✗	✗	✓	✓	MMSYN1_0203	MPN246
DADNK	RR01146	Both	ATP + Deoxyadenosine ⇄ ADP + H+ + dAMP	✗	✓	✗	✗	✗	✗	✓	✗	MMSYN1_0330 or MMSYN1_0382	MPN386
DCYTK	IR00911	Both	ATP + Deoxycytidine → ADP + H+ + dCMP	✗	✗	✗	✗	✗	✗	✓	✗	MMSYN1_0330 or MMSYN1_0382	MPN386
DGSNK	RR03808	Both	ATP + Deoxyguanosine ⇄ ADP + H+ + dGMP	✗	✓	✗	✗	✗	✗	✓	✗	MMSYN1_0330 or MMSYN1_0382	MPN386
CYTK1	RR00268	Both	ATP + CMP ⇄ ADP + CDP	✓	✓	✗	✗	✗	✗	✓	✓	MMSYN1_0347	MPN476
CYTK2	RR00910	Both	ATP + dCMP ⇄ ADP + dCDP	✓	✓	✗	✗	✗	✗	✓	✓	MMSYN1_0347	MPN476
UMPK	RR00111	Both	ATP + UMP ⇄ ADP + UDP	✓	✓	✗	✗	✗	✗	✓	✓	MMSYN1_0537	MPN632
ADK1	RR08879	Both	ATP + AMP ⇄ ADP	✓	✓	✗	✗	✗	✗	✓	✓	MMSYN1_0651	MPN185
DADK	RR03698	Both	ATP + dAMP ⇄ ADP + dADP	✓	✓	✗	✗	✗	✗	✓	✓	MMSYN1_0651	MPN185
PUNP2	RR01475	Both	Orthophosphate + Deoxyadenosine ⇄ Adenine + 2-Deoxy-D-ribose 1-phosphate	✓	✓	✗	✗	✗	✗	✓	✓	MMSYN1_0747	MPN062
PUNP4	RR03810	Both	Orthophosphate + Deoxyguanosine ⇄ Guanine + 2-Deoxy-D-ribose 1-phosphate	✓	✓	✗	✗	✗	✗	✓	✓	MMSYN1_0747	MPN062
RNDR1	IR04340	Both	ADP + Thioredoxin → H2O + dADP + Thioredoxin disulfide	✗	✗	✗	✗	✗	✗	✓	✓	MMSYN1_0771 and MMSYN1_0772 and MMSYN1_0773	MPN322 and MPN323 and MPN324
RNDR2	IR04341	Both	GDP + Thioredoxin → H2O + Thioredoxin disulfide + dGDP	✗	✗	✗	✗	✗	✗	✓	✓	MMSYN1_0771 and MMSYN1_0772 and MMSYN1_0773	MPN322 and MPN323 and MPN324
RNDR3	IR04343	Both	CDP + Thioredoxin → H2O + Thioredoxin disulfide + dCDP	✗	✗	✗	✗	✗	✗	✓	✓	MMSYN1_0771 and MMSYN1_0772 and MMSYN1_0773	MPN322 and MPN323 and MPN324
RNDR4	IR04342	Both	UDP + Thioredoxin → H2O + Thioredoxin disulfide + dUDP	✗	✗	✗	✗	✗	✗	✓	✓	MMSYN1_0771 and MMSYN1_0772 and MMSYN1_0773	MPN322 and MPN323 and MPN324
ACKr	RR00157	Both	ATP + Acetate ⇄ ADP + Acetyl phosphate	✓	✓	✗	✗	✗	✗	✓	✓	MMSYN1_0230	MPN533
GHMT	RR00598	Both	H2O + Glycine + 5,10-Methylenetetrahydrofolate ⇄ L-Serine + Tetrahydrofolate	✓	✓	✗	✗	✗	✗	✓	✓	MMSYN1_0799	MPN576
RPE	RR03691	Both	D-Ribulose 5-phosphate ⇄ D-Xylulose 5-phosphate	✓	✓	✗	✗	✗	✗	✓	✓	MMSYN1_0262	MPN251
TKT1	RR03769	Both	D-Ribose 5-phosphate + D-Xylulose 5-phosphate ⇄ D-Glyceraldehyde 3-phosphate + Sedoheptulose 7-phosphate	✓	✓	✗	✗	✗	✗	✓	✓	MMSYN1_0316	MPN082
TKT2	RR00689	Both	D-Fructose 6-phosphate + D-Glyceraldehyde 3-phosphate ⇄ D-Xylulose 5-phosphate + D-Erythrose 4-phosphate	✓	✓	✗	✗	✗	✗	✓	✓	MMSYN1_0316	MPN082
RPI	RR00681	Both	D-Ribose 5-phosphate ⇄ D-Ribulose 5-phosphate	✓	✓	✗	✗	✗	✗	✓	✓	MMSYN1_0800	MPN595
PRPPS	IR00674	Both	ATP + D-Ribose 5-phosphate ⇄ AMP + H+ + 5-Phospho-alpha-D-ribose 1-diphosphate	✓	✗	✗	✗	✗	✗	✓	✗	MMSYN1_0831	MPN073
PTAr	RR03546	Both	Orthophosphate + Acetyl-CoA ⇄ CoA + Acetyl phosphate	✓	✓	✗	✗	✗	✗	✓	✓	MMSYN1_0229	MPN428
MANpts	IR08786	Both	Phosphoenolpyruvate + D-Mannose (e) → Pyruvate + D-Mannose 6-phosphate	✗	✗	✗	✓	✗	✗	✓	✓	MMSYN1_0233 and MMSYN1_0694 and MMSYN1_0234 and MMSYN1_0779	MPN078
GLCpts	IR08828	Both	D-Glucose (e) + Phosphoenolpyruvate → Pyruvate + D-Glucose 6-phosphate	✗	✗	✗	✓	✗	✗	✓	✓	MMSYN1_0233 and MMSYN1_0694 and MMSYN1_0234 and MMSYN1_0779	MPN627 and MPN207
PIabc	IR08824	Both	H2O + ATP + Orthophosphate (e) → ADP + Orthophosphate + H+	✗	✗	✗	✓	✗	✗	✓	✗	MMSYN1_0425 and MMSYN1_0426 and MMSYN1_0427	MPN609 and MPN610 and MPN611
PPA	IR00001	Both	H2O + Diphosphate → Orthophosphate + H+	✗	✗	✗	✗	✗	✗	✓	✗	MMSYN1_0344	MPN528
TRDR	RR04369	Both	NADPH + H+ + Thioredoxin disulfide ⇄ NADP+ + Thioredoxin	✗	✓	✗	✗	✗	✗	✓	✓	MMSYN1_0819 and MMSYN1_0065	MPN240
PAPA	IR09824	Both	H2O + Phosphatidate → Orthophosphate + Diacylglycerol	✗	✗	✗	✗	✓	✗	✓	✓		MPN455
DNAP	IR09861	Both	H2O + ATP + dATP + dGTP + dCTP + dTTP → ADP + Orthophosphate + Diphosphate + DNA + H+	✗	✗	✗	✗	✗	✗	✓			MPN034 and MPN378
RNAP	IR09884	Both	H2O + ATP + GTP + CTP + UTP → ADP + Orthophosphate + Diphosphate + RNA + H+	✗	✗	✗	✗	✗	✗	✓			MPN516
NCTPPRT	RR00952	Both	H+ + 5-Phospho-alpha-D-ribose 1-diphosphate + Nicotinate → Diphosphate + Nicotinate D-ribonucleotide	✗	✓	✗	✗	✗	✗	✓		MMSYN1_0614	MPN047
PPM	RR00682	Both	D-Ribose 5-phosphate ⇄ alpha-D-Ribose 1-phosphate	✓	✓	✗	✗	✗	✗	✓		MMSYN1_0733	MPN066
UPPRT	RR00617	Both	Uracil + 5-Phospho-alpha-D-ribose 1-diphosphate → Diphosphate + UMP	✗	✓	✗	✗	✗	✗	✓		MMSYN1_0798	MPN033
PUNP1	RR03709	Both	Orthophosphate + Adenosine ⇄ Adenine + alpha-D-Ribose 1-phosphate	✓	✓	✗	✗	✗	✗	✓		MMSYN1_0747	MPN062
PUNP3	RR01184	Both	Orthophosphate + Guanosine ⇄ Guanine + alpha-D-Ribose 1-phosphate	✓	✓	✗	✗	✗	✗	✓		MMSYN1_0747	MPN062
ADPT	RR03512	Both	5-Phospho-alpha-D-ribose 1-diphosphate + Adenine → Diphosphate + AMP	✗	✓	✗	✗	✗	✗	✓		MMSYN1_0413	MPN395
GUAPRT	RR00779	Both	5-Phospho-alpha-D-ribose 1-diphosphate + Guanine → Diphosphate + GMP	✗	✓	✗	✗	✗	✗	✓		MMSYN1_0216	MPN672
DRPA	IR00688	Both	Acetaldehyde + D-Glyceraldehyde 3-phosphate ⇄ 2-Deoxy-D-ribose 5-phosphate	✓	✗	✗	✗	✗	✗	✓		MMSYN1_0732	MPN063
GLYCt	RR08739	Both	Glycerol ⇄ Glycerol (e)	✓	✓	✗	✓	✗	✗	✓			MPN043
ATPase	RR08593	Both	ADP + Orthophosphate + H+ (e) → H2O + ATP + H+	✗	✓	✗	✓	✗	✗	✓		MMSYN1_0789 and MMSYN1_0790 and MMSYN1_0791 and MMSYN1_0792 and MMSYN1_0793 and MMSYN1_0794 and MMSYN1_0795 and MMSYN1_0796	MPN597 and MPN598 and MPN599 and MPN600 and MPN601 and MPN602 and MPN603 and MPN604
RNA_degrad	IR09885	Both	H2O + RNA → AMP + CMP + H+ + UMP + GMP	✗	✗	✗	✗	✗	✗	✓
Protein_degrad	IR09954	Both	H2O + ATP + Protein → ADP + Orthophosphate + L-Glutamate + Glycine + L-Alanine + L-Lysine + L-Aspartate + L-Arginine + L-Glutamine + L-Serine + L-Methionine + L-Tryptophan + L-Phenylalanine + H+ + L-Tyrosine + L-Cysteine + L-Leucine + L-Histidine + L-Proline + L-Asparagine + L-Valine + L-Threonine + L-Isoleucine	✗	✗	✗	✗	✗	✗	✓		MMSYN1_0394
URAt2	RR08636	Both	H+ (e) + Uracil (e) → H+ + Uracil	✗	✓	✗	✓	✓	✓	✓
ADEt2	RR08870	Both	H+ (e) + Adenine (e) → H+ + Adenine	✗	✓	✗	✓	✓	✓	✓
NOX	RR09889	Both	NADH + Oxygen + H+ → H2O + NAD+	✗	✓	✗	✗	✓	✗	✓			MPN394
FAt	RR09830	Both	Fatty acid ⇄ Fatty acid (e)	✓	✓	✗	✓	✗	✗	✓	✓
GUAt2	IR08645	Both	H+ (e) + Guanine (e) → H+ + Guanine	✗	✗	✗	✓	✓	✓	✓	✓
H2Ot	RR08674	Both	H2O ⇄ H2O (e)	✓	✓	✗	✓	✗	✗	✓	✓
HCYSt	IR09865	Both	L-Homocysteine → L-Homocysteine (e)	✗	✗	✗	✓	✗	✗	✓	✓
L_LACt2r	IR09886	Both	H+ + (S)-Lactate ⇄ H+ (e) + (S)-Lactate (e)	✓	✗	✗	✓	✓	✓	✓	✓
NTD1	IR01159	Both	H2O + dUMP → Orthophosphate + Deoxyuridine	✗	✗	✗	✗	✓	✓	✓	✓
NTD5	IR03716	Both	H2O + dTMP → Orthophosphate + Thymidine	✗	✗	✗	✗	✓	✓	✓	✓
NTD9	IR00777	Both	H2O + GMP → Orthophosphate + Guanosine	✗	✗	✗	✗	✓	✓	✓	✓
O2t	RR08670	Both	Oxygen ⇄ Oxygen (e)	✓	✓	✗	✓	✗	✗	✓	✓
TALA	RR01018	Both	D-Fructose 6-phosphate + D-Erythrose 4-phosphate ⇄ D-Glyceraldehyde 3-phosphate + Sedoheptulose 7-phosphate	✓	✓	✗	✗	✓	✓	✓	✓
NH3t	RR09841	Both	Ammonia ⇄ Ammonia (e)	✓	✓	✗	✓	✗	✗	✓
ACt	IR09888	Both	Acetate + H+ ⇄ Acetate (e) + H+ (e)	✓	✗	✗	✓	✓	✓	✓	✓
CO2t	RR08672	Both	CO2 ⇄ CO2 (e)	✓	✓	✗	✓	✗	✗	✓	✓
EX_h_e	RR08971	Both	H+ (e) ⇄ ∅	✓	✓	✓	✗	✗	✗	✗
EX_h2o_e	RR09229	Both	H2O (e) ⇄ ∅	✓	✓	✓	✗	✗	✗	✗
EX_fa_e	RR09837	Both	Fatty acid (e) ⇄ ∅	✓	✓	✓	✗	✗	✗	✗
EX_glc__D_e	IR08970	Both	D-Glucose (e) ⇄ ∅	✓	✗	✓	✗	✗	✗	✗
EX_glyc_e	IR09073	Both	Glycerol (e) ⇄ ∅	✓	✗	✓	✗	✗	✗	✗
EX_gua_e	IR09079	Both	Guanine (e) ⇄ ∅	✓	✗	✓	✗	✗	✗	✗
EX_man_e	IR09093	Both	D-Mannose (e) → ∅	✗	✗	✓	✗	✗	✗	✗
EX_o2_e	IR09095	Both	Oxygen (e) ⇄ ∅	✓	✗	✓	✗	✗	✗	✗
EX_nac_e	IR09800	Both	Nicotinate (e) ⇄ ∅	✓	✗	✓	✗	✗	✗	✗
EX_ribflv_e	IR09802	Both	Riboflavin (e) ⇄ ∅	✓	✗	✓	✗	✗	✗	✗
EX_ura_e	IR09807	Both	Uracil (e) ⇄ ∅	✓	✗	✓	✗	✗	✗	✗
EX_cytd_e	IR09808	Both	Cytidine (e) ⇄ ∅	✓	✗	✓	✗	✗	✗	✗
EX_dcyt_e	IR09809	Both	Deoxycytidine (e) ⇄ ∅	✓	✗	✓	✗	✗	✗	✗
EX_ac_e	IR08996	Both	Acetate (e) ⇄ ∅	✓	✗	✓	✗	✗	✗	✗	✗
EX_ade_e	RR09104	Both	Adenine (e) ⇄ ∅	✓	✓	✓	✗	✗	✗	✗	✗
EX_ala__L_e	RR09082	Both	L-Alanine (e) ⇄ ∅	✓	✓	✓	✗	✗	✗	✗	✗
EX_arg__L_e	RR09050	Both	L-Arginine (e) ⇄ ∅	✓	✓	✓	✗	✗	✗	✗	✗
EX_asn__L_e	RR09421	Both	L-Asparagine (e) ⇄ ∅	✓	✓	✓	✗	✗	✗	✗	✗
EX_asp__L_e	RR09052	Both	L-Aspartate (e) ⇄ ∅	✓	✓	✓	✗	✗	✗	✗	✗
EX_co2_e	RR09054	Both	CO2 (e) ⇄ ∅	✓	✓	✓	✗	✗	✗	✗	✗
EX_cys__L_e	RR09428	Both	L-Cysteine (e) ⇄ ∅	✓	✓	✓	✗	✗	✗	✗	✗
EX_gln__L_e	RR09084	Both	L-Glutamine (e) ⇄ ∅	✓	✓	✓	✗	✗	✗	✗	✗
EX_glu__L_e	RR09070	Both	L-Glutamate (e) ⇄ ∅	✓	✓	✓	✗	✗	✗	✗	✗
EX_gly_e	RR09076	Both	Glycine (e) ⇄ ∅	✓	✓	✓	✗	✗	✗	✗	✗
EX_hcys__L_e	IR09866	Both	L-Homocysteine (e) ⇄ ∅	✓	✗	✓	✗	✗	✗	✗	✗
EX_his__L_e	RR09086	Both	L-Histidine (e) ⇄ ∅	✓	✓	✓	✗	✗	✗	✗	✗
EX_ile__L_e	RR09458	Both	L-Isoleucine (e) ⇄ ∅	✓	✓	✓	✗	✗	✗	✗	✗
EX_lac__L_e	IR09505	Both	(S)-Lactate (e) → ∅	✗	✗	✓	✗	✗	✗	✗	✗
EX_leu__L_e	RR09462	Both	L-Leucine (e) ⇄ ∅	✓	✓	✓	✗	✗	✗	✗	✗
EX_lys__L_e	RR09088	Both	L-Lysine (e) ⇄ ∅	✓	✓	✓	✗	✗	✗	✗	✗
EX_met__L_e	RR09471	Both	L-Methionine (e) ⇄ ∅	✓	✓	✓	✗	✗	✗	✗	✗
EX_nh3_e	RR09124	Both	Ammonia (e) ⇄ ∅	✓	✓	✓	✗	✗	✗	✗	✗
EX_phe__L_e	RR09098	Both	L-Phenylalanine (e) ⇄ ∅	✓	✓	✓	✗	✗	✗	✗	✗
EX_pi_e	RR09100	Both	Orthophosphate (e) ⇄ ∅	✓	✓	✓	✗	✗	✗	✗	✗
EX_pro__L_e	RR09090	Both	L-Proline (e) ⇄ ∅	✓	✓	✓	✗	✗	✗	✗	✗
EX_ser__L_e	RR09484	Both	L-Serine (e) ⇄ ∅	✓	✓	✓	✗	✗	✗	✗	✗
EX_thr__L_e	RR09116	Both	L-Threonine (e) ⇄ ∅	✓	✓	✓	✗	✗	✗	✗	✗
EX_trp__L_e	RR09493	Both	L-Tryptophan (e) ⇄ ∅	✓	✓	✓	✗	✗	✗	✗	✗
EX_tyr__L_e	RR09496	Both	L-Tyrosine (e) ⇄ ∅	✓	✓	✓	✗	✗	✗	✗	✗
EX_val__L_e	RR09498	Both	L-Valine (e) ⇄ ∅	✓	✓	✓	✗	✗	✗	✗	✗
	RR00590	MPN	NAD+ + Tetrahydrofolate ⇄ NADH + H+ + Dihydrofolate		✓	✗	✗		✗		✓		MPN321 or MPN300
	RR01236	MPN	NAD+ + Dihydrofolate ⇄ NADH + Folate		✓	✗	✗		✗		✗		MPN321 or MPN300
	IR09956	MPN	H2O + ATP + Protein → ADP + Orthophosphate + H+ + DnaK-folded protein (Mpn)		✗	✗	✗		✗				MPN434 and MPN002 and MPN120
	IR09961	MPN	H2O + ATP + Protein → ADP + Orthophosphate + H+ + GroEL-folded protein (Mpn)		✗	✗	✗		✗				MPN573 and MPN574
	IR00341	MPN	ATP + Thiamin monophosphate → ADP + Thiamin diphosphate		✗	✗	✗		✗		✓		MPN550
	IR09797	MPN	10-Formyltetrahydrofolate + L-Methionyl-tRNA → Tetrahydrofolate + N-Formylmethionyl-tRNA		✗	✗	✗		✗		✗		MPN543
	IR00296	MPN	H2O + L-Arginine → Ammonia + H+ + L-Citrulline		✗	✗	✗		✗		✗		(MPN304 and MPN305) or MPN560
	IR00656	MPN	ATP + Choline → ADP + H+ + Choline phosphate		✗	✗	✗		✗		✗		MPN532
	IR01064	MPN	CTP + H+ + Choline phosphate → Diphosphate + CDP-choline		✗	✗	✗		✗		✗		MPN336
	IR03894	MPN	ATP + H+ + Pantetheine 4-phosphate → Diphosphate + Dephospho-CoA		✗	✗	✗		✗				MPN336
	IR00094	MPN	ATP + Dephospho-CoA → ADP + CoA + H+		✗	✗	✗		✗		✗		MPN382
	IR09871	MPN	UDP-glucose + UDP-alpha-D-galactose + Diacylglycerol → UDP + H+ + Glycolipid		✗	✗	✗		✗				MPN483
	RR00521	MPN	Oxygen + sn-Glycerol 3-phosphate ⇄ Hydrogen peroxide + Glycerone phosphate		✓	✗	✗		✗		✓		MPN051
	IR09821	MPN	sn-Glycerol 3-phosphate + Acyl-[acyl-carrier protein] → Acyl-carrier protein + 1-Acyl-sn-glycerol 3-phosphate		✗	✗	✗		✗		✗		MPN350 and MPN546
	RR00662	MPN	H2O + sn-Glycero-3-phosphocholine ⇄ H+ + sn-Glycerol 3-phosphate + Choline		✓	✗	✗		✗		✗		MPN420
	IR00649	MPN	ATP + Glycerone → ADP + H+ + Glycerone phosphate		✗	✗	✗		✗		✗		MPN547
	IR08910	MPN	ATP + D-Fructose 1-phosphate → ADP + H+ + D-Fructose 1,6-bisphosphate		✗	✗	✗		✗		✗		MPN079
	RR01850	MPN	L-Ribulose 5-phosphate ⇄ L-Xylulose 5-phosphate		✓	✗	✗		✗		✓		MPN492
	IR04231	MPN	H+ + 3-Dehydro-L-gulonate 6-phosphate → CO2 + L-Xylulose 5-phosphate		✗	✗	✗		✗		✗		MPN493
	IR09773	MPN	Ascorbate (e) + Phosphoenolpyruvate + H+ → Pyruvate + L-Ascorbate 6-phosphate		✗	✗	✓		✗		✗		MPN494 and MPN495 and MPN496
	RR03195	MPN	D-Xylulose 5-phosphate ⇄ L-Ribulose 5-phosphate		✓	✗	✗		✗		✓		MPN498
	RR00452	MPN	NAD+ + D-Mannitol 1-phosphate ⇄ NADH + H+ + D-Fructose 6-phosphate		✓	✗	✗		✗		✓		MPN652
	IR01486	MPN	D-Fructose 1-phosphate → Glycerone phosphate + D-Glyceraldehyde		✗	✗	✗		✗		✓		MPN025
	RR01155	MPN	ATP + dUMP ⇄ ADP + dUDP		✓	✗	✗		✗		✓		MPN006
	RR01052	MPN	Orthophosphate + H+ + Uridine ⇄ Uracil + alpha-D-Ribose 1-phosphate		✓	✗	✗		✗		✗		MPN064
	RR01416	MPN	Orthophosphate + Deoxyuridine ⇄ Uracil + 2-Deoxy-D-ribose 1-phosphate		✓	✗	✗		✗		✓		MPN064
	RR03717	MPN	Orthophosphate + Thymidine ⇄ Thymine + 2-Deoxy-D-ribose 1-phosphate		✓	✗	✗		✗		✓		MPN064
	IR01054	MPN	H2O + Cytidine → Ammonia + Uridine		✗	✗	✗		✗		✓		MPN065
	IR01418	MPN	H2O + Deoxycytidine → Ammonia + Deoxyuridine		✗	✗	✗		✗		✓		MPN065
	RR00106	MPN	ATP + CO2 + Ammonia ⇄ ADP + H+ + Carbamoyl phosphate		✓	✗	✗		✗		✗		MPN307
	IR00269	MPN	ATP + Cytidine → ADP + CMP + H+		✗	✗	✗		✗		✗		MPN561
	IR00615	MPN	ATP + Uridine → ADP + H+ + UMP		✗	✗	✗		✗		✗		MPN561
	IR00596	MPN	ATP + Formate + Tetrahydrofolate → ADP + Orthophosphate + 10-Formyltetrahydrofolate		✗	✗	✗		✗		✓		MPN017
	RR00771	MPN	NADPH + H+ + 5,10-Methenyltetrahydrofolate ⇄ NADP+ + 5,10-Methylenetetrahydrofolate		✓	✗	✗		✗		✗		MPN017
	RR00902	MPN	H2O + 5,10-Methenyltetrahydrofolate ⇄ 10-Formyltetrahydrofolate		✓	✗	✗		✗		✗		MPN017
	RR01158	MPN	5,10-Methylenetetrahydrofolate + dUMP ⇄ dTMP + Dihydrofolate		✓	✗	✗		✗		✓		MPN320
	IR03832	MPN	ATP + Folinic acid → ADP + Orthophosphate + H+ + 5,10-Methenyltetrahydrofolate		✗	✗	✗		✗		✗		MPN348
	IR08208	MPN	H2O + H+ + 5,10-Methenyltetrahydrofolate → Folinic acid		✗	✗	✗		✗		✗		MPN576
	IR08829	MPN	Phosphoenolpyruvate + D-Fructose (e) → Pyruvate + D-Fructose 1-phosphate		✗	✗	✓		✗		✓		MPN078
	IR08849	MPN	H2O + ATP + sn-Glycerol 3-phosphate (e) → ADP + Orthophosphate + H+ + sn-Glycerol 3-phosphate		✗	✗	✓		✗		✗		MPN133 and MPN134 and MPN135 and MPN136
	IR09811	MPN	D-Ribose (e) → D-Ribose		✗	✗	✓		✗		✓		MPN258 and MPN259 and MPN260
	IR08826	MPN	Phosphoenolpyruvate + Mannitol (e) → Pyruvate + D-Mannitol 1-phosphate		✗	✗	✓		✗		✓		MPN651 and MPN653
	IR09863	MPN	S-Adenosyl-L-methionine + DNA → S-Adenosyl-L-homocysteine + DNA 5-methylcytosine		✗	✗	✗		✗				MPN108
	IR09847	MPN	H2O + Acyl-carrier protein → H+ + Apo-[acyl-carrier-protein] + Pantetheine 4-phosphate		✗	✗	✗		✗				MPN479
	RR09769	MPN	H2O + L-Ascorbate 6-phosphate ⇄ H+ + 3-Dehydro-L-gulonate 6-phosphate		✓	✗	✗		✗		✗		MPN497
	RR03649	MPN	Orthophosphate + H+ + L-Citrulline ⇄ L-Ornithine + Carbamoyl phosphate		✓	✗	✗		✗		✗		MPN306
	RR09857	MPN	H2O + Phosphatidylcholine ⇄ Fatty acid + sn-Glycero-3-phosphocholine		✓	✗	✗		✗		✗		MPN445
	RR00667	MPN	NAD+ + Glycerol ⇄ NADH + H+ + D-Glyceraldehyde		✓	✗	✗		✗		✓		MPN564
	RR03544	MPN	NAD+ + CoA + Acetaldehyde ⇄ NADH + Acetyl-CoA + H+		✓	✗	✗		✗		✓		MPN564
	IR00267	MPN	H2O + CMP → Orthophosphate + Cytidine		✗	✗	✗		✓		✓
	IR00614	MPN	H2O + UMP → Orthophosphate + Uridine		✗	✗	✗		✓		✓
	IR00648	MPN	H2O + Glycerone phosphate → Orthophosphate + Glycerone		✗	✗	✗		✗		✓
	IR00676	MPN	ATP + D-Ribose → ADP + H+ + D-Ribose 5-phosphate		✗	✗	✗		✓		✗
	IR00909	MPN	H2O + dCMP → Orthophosphate + Deoxycytidine		✗	✗	✗		✓		✓
	IR01174	MPN	ATP + Thiamine → ADP + H+ + Thiamin monophosphate		✗	✗	✗		✓		✗
	IR01710	MPN	ATP + Pantetheine → ADP + H+ + Pantetheine 4-phosphate		✗	✗	✗		✓
	IR03497	MPN	ATP + Pyridoxal → ADP + Pyridoxal phosphate + H+		✗	✗	✗		✓		✗
	IR03505	MPN	H2O + AMP → Orthophosphate + Adenosine		✗	✗	✗		✓		✓
	IR08635	MPN	L-Alanine + H+ → L-Alanine (e) + H+ (e)		✗	✗	✓		✗		✓
	IR08658	MPN	Nicotinate (e) → Nicotinate		✗	✗	✓		✓		✓
	IR08659	MPN	H2O + ATP + L-Asparagine (e) → ADP + Orthophosphate + H+ + L-Asparagine		✗	✗	✓		✓		✗
	IR08661	MPN	H+ + L-Asparagine → H+ (e) + L-Asparagine (e)		✗	✗	✓		✗		✓
	IR08663	MPN	H2O + ATP + L-Cysteine (e) → ADP + Orthophosphate + H+ + L-Cysteine		✗	✗	✓		✓		✗
	IR08684	MPN	H+ + L-Histidine → H+ (e) + L-Histidine (e)		✗	✗	✓		✗		✓
	IR08686	MPN	L-Phenylalanine + H+ → L-Phenylalanine (e) + H+ (e)		✗	✗	✓		✗		✓
	IR08688	MPN	H+ + L-Leucine → H+ (e) + L-Leucine (e)		✗	✗	✓		✗		✓
	IR08690	MPN	H+ + L-Valine → H+ (e) + L-Valine (e)		✗	✗	✓		✗		✓
	IR08692	MPN	H+ + L-Isoleucine → H+ (e) + L-Isoleucine (e)		✗	✗	✓		✗		✓
	IR08707	MPN	Glycine + H+ → Glycine (e) + H+ (e)		✗	✗	✓		✗		✓
	IR08738	MPN	H2O + ATP + L-Glutamine (e) → ADP + Orthophosphate + L-Glutamine + H+		✗	✗	✓		✓		✗
	IR08746	MPN	H2O + ATP + L-Aspartate (e) → ADP + Orthophosphate + L-Aspartate + H+		✗	✗	✓		✓		✗
	IR08747	MPN	H2O + ATP + L-Glutamate (e) → ADP + Orthophosphate + L-Glutamate + H+		✗	✗	✓		✗		✗
	IR08750	MPN	L-Glutamate + H+ → L-Glutamate (e) + H+ (e)		✗	✗	✓		✗		✓
	IR08753	MPN	H2O + ATP + L-Arginine (e) → ADP + Orthophosphate + L-Arginine + H+		✗	✗	✓		✓		✗
	IR08754	MPN	H2O + ATP + L-Histidine (e) → ADP + Orthophosphate + H+ + L-Histidine		✗	✗	✓		✓		✗
	IR08755	MPN	H2O + ATP + L-Lysine (e) → ADP + Orthophosphate + L-Lysine + H+		✗	✗	✓		✓		✗
	IR08767	MPN	H2O + ATP + L-Isoleucine (e) → ADP + Orthophosphate + H+ + L-Isoleucine		✗	✗	✓		✓		✗
	IR08768	MPN	H2O + ATP + L-Threonine (e) → ADP + Orthophosphate + H+ + L-Threonine		✗	✗	✓		✓		✗
	IR08769	MPN	H2O + ATP + L-Alanine (e) → ADP + Orthophosphate + L-Alanine + H+		✗	✗	✓		✓		✗
	IR08770	MPN	H2O + ATP + L-Valine (e) → ADP + Orthophosphate + H+ + L-Valine		✗	✗	✓		✓		✗
	IR08771	MPN	H2O + ATP + L-Leucine (e) → ADP + Orthophosphate + H+ + L-Leucine		✗	✗	✓		✓		✗
	IR08779	MPN	L-Lysine + H+ → L-Lysine (e) + H+ (e)		✗	✗	✓		✗		✓
	IR08789	MPN	H2O + ATP + L-Methionine (e) → ADP + Orthophosphate + L-Methionine + H+		✗	✗	✓		✓		✗
	IR08807	MPN	H+ (e) + Deoxycytidine (e) → H+ + Deoxycytidine		✗	✗	✓		✓		✓
	IR08822	MPN	H+ + L-Proline → H+ (e) + L-Proline (e)		✗	✗	✓		✗		✓
	IR08823	MPN	H2O + ATP + L-Proline (e) → ADP + Orthophosphate + H+ + L-Proline		✗	✗	✓		✓		✗
	IR08835	MPN	L-Serine + H+ → L-Serine (e) + H+ (e)		✗	✗	✓		✗		✓
	IR08836	MPN	H2O + ATP + Thiamine (e) → ADP + Orthophosphate + H+ + Thiamine		✗	✗	✓		✓		✗
	IR08842	MPN	H+ + L-Threonine → H+ (e) + L-Threonine (e)		✗	✗	✓		✗		✓
	IR08844	MPN	L-Tryptophan + H+ → L-Tryptophan (e) + H+ (e)		✗	✗	✓		✗		✓
	IR08848	MPN	H+ + L-Tyrosine → H+ (e) + L-Tyrosine (e)		✗	✗	✓		✗		✓
	IR08984	MPN	H2O + ATP → ADP + Orthophosphate + H+		✗	✗	✗		✗		✗
	IR09590	MPN	Orthophosphate → Orthophosphate (e)		✗	✗	✓		✓		✓
	IR09815	MPN	Folate (e) → Folate		✗	✗	✓		✓		✓
	IR09816	MPN	Pantetheine (e) → Pantetheine		✗	✗	✓		✓		✓
	IR09817	MPN	Pyridoxal (e) → Pyridoxal		✗	✗	✓		✓		✓
	IR09818	MPN	Riboflavin (e) → Riboflavin		✗	✗	✓		✓		✓
	IR09820	MPN	ATP + Fatty acid + Acyl-carrier protein → Diphosphate + AMP + H+ + Acyl-[acyl-carrier protein]		✗	✗	✗		✓		✗
	IR09829	MPN	CDP-diacylglycerol + Phosphatidylglycerol → CMP + H+ + Cardiolipin		✗	✗	✗		✓		✗
	IR09845	MPN	H2O + ATP + L-Serine (e) → ADP + Orthophosphate + L-Serine + H+		✗	✗	✓		✓		✗
	IR09855	MPN	H+ (e) + Thymine (e) → H+ + Thymine		✗	✗	✓		✓		✓
	IR09860	MPN	H2O + ATP + Phosphatidylcholine (e) → ADP + Orthophosphate + H+ + Phosphatidylcholine		✗	✗	✓		✓		✗
	IR09909	MPN	H2O + ATP + L-Alanyl-tRNA + L-Lysyl-tRNA + L-Leucyl-tRNA + L-Arginyl-tRNA(Arg) + Glutaminyl-tRNA + Glycyl-tRNA(Gly) + L-Methionyl-tRNA + L-Seryl-tRNA(Ser) + L-Valyl-tRNA(Val) + L-Prolyl-tRNA(Pro) + L-Tyrosyl-tRNA(Tyr) + L-Aspartyl-tRNA(Asp) + L-Glutamyl-tRNA(Glu) + L-Histidyl-tRNA(His) + L-Threonyl-tRNA(Thr) + L-Cysteinyl-tRNA(Cys) + L-Isoleucyl-tRNA(Ile) + N-Formylmethionyl-tRNA + L-Asparaginyl-…		✗	✗	✗		✗		✗
	IR09923	MPN	L-Arginine + H+ → L-Arginine (e) + H+ (e)		✗	✗	✓		✗		✓
	IR09924	MPN	L-Aspartate + H+ → L-Aspartate (e) + H+ (e)		✗	✗	✓		✗		✓
	IR09925	MPN	H+ + L-Cysteine → H+ (e) + L-Cysteine (e)		✗	✗	✓		✗		✓
	IR09926	MPN	L-Glutamine + H+ → L-Glutamine (e) + H+ (e)		✗	✗	✓		✗		✓
	IR09927	MPN	L-Methionine + H+ → L-Methionine (e) + H+ (e)		✗	✗	✓		✗		✓
	IR09934	MPN	H2O + ATP + L-Alanyl-tRNA + L-Lysyl-tRNA + L-Leucyl-tRNA + L-Arginyl-tRNA(Arg) + Glutaminyl-tRNA + Glycyl-tRNA(Gly) + L-Methionyl-tRNA + L-Seryl-tRNA(Ser) + L-Valyl-tRNA(Val) + L-Prolyl-tRNA(Pro) + L-Aspartyl-tRNA(Asp) + L-Glutamyl-tRNA(Glu) + L-Histidyl-tRNA(His) + L-Threonyl-tRNA(Thr) + L-Isoleucyl-tRNA(Ile) + N-Formylmethionyl-tRNA + L-Asparaginyl-tRNA(Asn) + L-Phenylalanyl-tRNA(Phe) → ADP + O…		✗	✗	✗		✗		✗
	IR09955	MPN	NADPH + NADP+ + Orthophosphate + CoA + FAD + Protein + Pyridoxal phosphate + S-Adenosyl-L-methionine + L-Glutamate + Glycine + DNA + L-Alanine + RNA + L-Lysine + L-Aspartate + L-Arginine + L-Glutamine + L-Serine + Thiamin diphosphate + L-Methionine + L-Tryptophan + L-Phenylalanine + L-Tyrosine + D-Glucose 6-phosphate + L-Cysteine + L-Leucine + L-Histidine + L-Proline + L-Asparagine + L-Valine + L…		✗	✗	✗		✗
	IR09881	MPN	Biomass + H2O + ATP → Biomass (e) + ADP + Orthophosphate + H+		✗	✗	✓		✗
	IR09957	MPN	H2O + ATP + L-Tryptophan (e) → ADP + Orthophosphate + L-Tryptophan + H+		✗	✗	✓		✓		✗
	IR09958	MPN	H2O + ATP + L-Tyrosine (e) → ADP + Orthophosphate + H+ + L-Tyrosine		✗	✗	✓		✓		✗
	IR09959	MPN	H2O + ATP + L-Phenylalanine (e) → ADP + Orthophosphate + L-Phenylalanine + H+		✗	✗	✓		✓		✗
	IR09960	MPN	H2O + ATP + Glycine (e) → ADP + Orthophosphate + Glycine + H+		✗	✗	✓		✓		✗
	RR00275	MPN	NAD+ + Formate ⇄ NADH + CO2		✓	✗	✗		✓		✗
	RR08615	MPN	L-Arginine + L-Ornithine (e) ⇄ L-Arginine (e) + L-Ornithine		✓	✗	✓		✓		✓
	RR08860	MPN	H+ + Cytidine ⇄ H+ (e) + Cytidine (e)		✓	✗	✓		✓		✓
	RR08868	MPN	H+ + Choline ⇄ H+ (e) + Choline (e)		✓	✗	✓		✓		✓
	RR09789	MPN	Hydrogen peroxide ⇄ Hydrogen peroxide (e)		✓	✗	✓		✗		✓
	IR09771	MPN	∅ → Ascorbate (e)		✗	✓	✗		✗		✗
	IR09798	MPN	∅ → Folate (e)		✗	✓	✗		✗		✗
	IR09799	MPN	∅ → Pantetheine (e)		✗	✓	✗		✗		✗
	IR09801	MPN	∅ → Pyridoxal (e)		✗	✓	✗		✗		✗
	IR09803	MPN	∅ → Thiamine (e)		✗	✓	✗		✗		✗
	IR09805	MPN	∅ → Mannitol (e)		✗	✓	✗		✗		✗
	IR09059	MPN	∅ → D-Fructose (e)		✗	✓	✗		✗		✗
	IR09075	MPN	∅ → sn-Glycerol 3-phosphate (e)		✗	✓	✗		✗		✗
	IR09109	MPN	∅ → D-Ribose (e)		✗	✓	✗		✗		✗
	IR09198	MPN	Adenosine 3',5'-bisphosphate → ∅		✗	✓	✗		✗		✗
	IR09271	MPN	NADP+ → ∅		✗	✓	✗		✗		✗
	IR09479	MPN	L-Ornithine (e) → ∅		✗	✓	✗		✗		✗
	IR09840	MPN	Hydrogen peroxide (e) → ∅		✗	✓	✗		✗		✗
	IR09854	MPN	∅ → Thymine (e)		✗	✓	✗		✗		✗
	IR09859	MPN	∅ → Phosphatidylcholine (e)		✗	✓	✗		✗		✗
	IR09864	MPN	DNA 5-methylcytosine → ∅		✗	✓	✗		✗
	RR09424	MPN	Choline (e) ⇄ ∅		✓	✓	✗		✗		✗
	RR09882	MPN	Biomass (e) ⇄ ∅		✓	✓	✗		✗
ALA4P		Syn3A	H2O + Tetra-L-alanine → L-Alanine	✗		✗	✗	✗		✓		MMSYN1_0133 or MMSYN1_0305 or MMSYN1_0444 or MMSYN1_0479
ARG4P		Syn3A	H2O + Tetra-L-arginine → L-Arginine	✗		✗	✗	✗		✓		MMSYN1_0133 or MMSYN1_0305 or MMSYN1_0444 or MMSYN1_0479
ASN4P		Syn3A	H2O + Tetra-L-asparagine → L-Asparagine	✗		✗	✗	✗		✓		MMSYN1_0133 or MMSYN1_0305 or MMSYN1_0444 or MMSYN1_0479
ASP4P		Syn3A	H2O + Tetra-L-aspartate → L-Aspartate	✗		✗	✗	✗		✓		MMSYN1_0133 or MMSYN1_0305 or MMSYN1_0444 or MMSYN1_0479
GLN4P		Syn3A	H2O + Tetra-L-glutamine → L-Glutamine	✗		✗	✗	✗		✓		MMSYN1_0133 or MMSYN1_0305 or MMSYN1_0444 or MMSYN1_0479
GLU4P		Syn3A	H2O + Tetra-L-glutamate → L-Glutamate	✗		✗	✗	✗		✓		MMSYN1_0133 or MMSYN1_0305 or MMSYN1_0444 or MMSYN1_0479
GLY4P		Syn3A	H2O + Tetra-glycine → Glycine	✗		✗	✗	✗		✓		MMSYN1_0133 or MMSYN1_0305 or MMSYN1_0444 or MMSYN1_0479
HIS4P		Syn3A	H2O + Tetra-L-histidine → L-Histidine	✗		✗	✗	✗		✓		MMSYN1_0133 or MMSYN1_0305 or MMSYN1_0444 or MMSYN1_0479
ISO4P		Syn3A	H2O + Tetra-L-isoleucine → L-Isoleucine	✗		✗	✗	✗		✓		MMSYN1_0133 or MMSYN1_0305 or MMSYN1_0444 or MMSYN1_0479
LEU4P		Syn3A	H2O + Tetra-L-leucine → L-Leucine	✗		✗	✗	✗		✓		MMSYN1_0133 or MMSYN1_0305 or MMSYN1_0444 or MMSYN1_0479
LYS4P		Syn3A	H2O + Tetra-L-lysine → L-Lysine	✗		✗	✗	✗		✓		MMSYN1_0133 or MMSYN1_0305 or MMSYN1_0444 or MMSYN1_0479
MET4P		Syn3A	H2O + Tetra-L-methionine → L-Methionine	✗		✗	✗	✗		✓		MMSYN1_0133 or MMSYN1_0305 or MMSYN1_0444 or MMSYN1_0479
PHE4P		Syn3A	H2O + Tetra-L-phenylalanine → L-Phenylalanine	✗		✗	✗	✗		✓		MMSYN1_0133 or MMSYN1_0305 or MMSYN1_0444 or MMSYN1_0479
PRO4P		Syn3A	H2O + Tetra-L-proline → L-Proline	✗		✗	✗	✗		✓		MMSYN1_0133 or MMSYN1_0305 or MMSYN1_0444 or MMSYN1_0479
SER4P		Syn3A	H2O + Tetra-L-serine → L-Serine	✗		✗	✗	✗		✓		MMSYN1_0133 or MMSYN1_0305 or MMSYN1_0444 or MMSYN1_0479
THR4P		Syn3A	H2O + Tetra-L-threonine → L-Threonine	✗		✗	✗	✗		✓		MMSYN1_0133 or MMSYN1_0305 or MMSYN1_0444 or MMSYN1_0479
TRP4P		Syn3A	H2O + Tetra-L-tryptophan → L-Tryptophan	✗		✗	✗	✗		✓		MMSYN1_0133 or MMSYN1_0305 or MMSYN1_0444 or MMSYN1_0479
TYR4P		Syn3A	H2O + Tetra-L-tyrosine → L-Tyrosine	✗		✗	✗	✗		✓		MMSYN1_0133 or MMSYN1_0305 or MMSYN1_0444 or MMSYN1_0479
VAL4P		Syn3A	H2O + Tetra-L-valine → L-Valine	✗		✗	✗	✗		✓		MMSYN1_0133 or MMSYN1_0305 or MMSYN1_0444 or MMSYN1_0479
ACP_transl		Syn3A	H2O + ATP + L-Alanyl-tRNA + L-Lysyl-tRNA + L-Leucyl-tRNA + L-Arginyl-tRNA(Arg) + Glutaminyl-tRNA + Glycyl-tRNA(Gly) + L-Methionyl-tRNA + L-Seryl-tRNA(Ser) + L-Valyl-tRNA(Val) + L-Tyrosyl-tRNA(Tyr) + L-Aspartyl-tRNA(Asp) + L-Glutamyl-tRNA(Glu) + L-Threonyl-tRNA(Thr) + L-Isoleucyl-tRNA(Ile) + N-Formylmethionyl-tRNA + L-Asparaginyl-tRNA(Asn) + L-Phenylalanyl-tRNA(Phe) → ADP + Orthophosphate + Format…	✗		✗	✗	✗		✓		MMSYN1_0201 and MMSYN1_0621 and MMSYN1_0650
Protein_transl		Syn3A	H2O + ATP + L-Alanyl-tRNA + L-Lysyl-tRNA + L-Leucyl-tRNA + L-Arginyl-tRNA(Arg) + Glutaminyl-tRNA + Glycyl-tRNA(Gly) + L-Methionyl-tRNA + L-Seryl-tRNA(Ser) + L-Valyl-tRNA(Val) + L-Prolyl-tRNA(Pro) + L-Tyrosyl-tRNA(Tyr) + L-Aspartyl-tRNA(Asp) + L-Glutamyl-tRNA(Glu) + L-Histidyl-tRNA(His) + L-Threonyl-tRNA(Thr) + L-Cysteinyl-tRNA(Cys) + L-Isoleucyl-tRNA(Ile) + N-Formylmethionyl-tRNA + L-Asparaginyl-…	✗		✗	✗	✗		✓		MMSYN1_0201 and MMSYN1_0650
AGDC		Syn3A	H2O + N-Acetyl-D-glucosamine 6-phosphate → Acetate + D-Glucosamine 6-phosphate	✗		✗	✗	✗		✓		MMSYN1_0493
FMETTRS		Syn3A	L-methionyl-tRNA(Met) + 10-formyltetrahydrofolate tri-L-glutamate → tetrahydrofolate tri-L-glutamate + N-formylmethionyl-tRNA(Met) + H+	✗		✗	✗	✗		✓		MMSYN1_0390
5FTHFPGS		Syn3A	5-formyltetrahydrofolate + L-glutamate + ATP --> 5-formyltetrahydrofolate tri-L-glutamate + ADP + Phosphate + H+	✗		✗	✗	✗		✓		MMSYN1_0823
PSSYN		Syn3A	UDP-alpha-D-galactofuranose → UDP + H+ + UDP-galactan	✗		✗	✗	✗		✓		MMSYN1_0113
DAGPST		Syn3A	Diacylglycerol + UDP-galactan → UDP + H+ + lipogalactan	✗		✗	✗	✗		✓		MMSYN1_0114
DAGGALT		Syn3A	Diacylglycerol + UDP-alpha-D-galactofuranose → UDP + H+ + 1,2-Diacyl-3-beta-D-galactosyl-sn-glycerol	✗		✗	✗	✗		✓		MMSYN1_0114 or MMSYN1_0697
APG3PAT		Syn3A	sn-Glycerol 3-phosphate + Acyl phosphate → Orthophosphate + 1-Acyl-sn-glycerol 3-phosphate	✗		✗	✗	✗		✓		MMSYN1_0117
CLPNS		Syn3A	Phosphatidylglycerol → Glycerol + Cardiolipin	✗		✗	✗	✗		✓		MMSYN1_0147
ACPPAT		Syn3A	Orthophosphate + Acyl-[acyl-carrier protein] ⇄ Acyl-carrier protein + Acyl phosphate	✓		✗	✗	✗		✓		MMSYN1_0419
FAKr		Syn3A	ATP + Fatty acid ⇄ ADP + Acyl phosphate	✓		✗	✗	✗		✓		MMSYN1_0420 and MMSYN1_0616 and MMSYN1_0617
UDPGALM		Syn3A	UDP-alpha-D-galactose ⇄ UDP-alpha-D-galactofuranose	✓		✗	✗	✗		✓		MMSYN1_0814
PdhC_transl		Syn3A	H2O + ATP + L-Alanyl-tRNA + L-Lysyl-tRNA + L-Leucyl-tRNA + L-Arginyl-tRNA(Arg) + Glutaminyl-tRNA + Glycyl-tRNA(Gly) + L-Methionyl-tRNA + L-Seryl-tRNA(Ser) + L-Valyl-tRNA(Val) + L-Prolyl-tRNA(Pro) + L-Tyrosyl-tRNA(Tyr) + L-Aspartyl-tRNA(Asp) + L-Glutamyl-tRNA(Glu) + L-Histidyl-tRNA(His) + L-Threonyl-tRNA(Thr) + L-Cysteinyl-tRNA(Cys) + L-Isoleucyl-tRNA(Ile) + N-Formylmethionyl-tRNA + L-Asparaginyl-…	✗		✗	✗	✗		✗		MMSYN1_0201 and MMSYN1_0227
PYK9		Syn3A	Phosphoenolpyruvate + H+ + dUDP → Pyruvate + dUTP	✗		✗	✗	✗		✓		MMSYN1_0221
PDH_acald		Syn3A	CoA + Acetaldehyde + Lipoylprotein → Acetyl-CoA + Dihydrolipoylprotein	✗		✗	✗	✗		✓		MMSYN1_0227
GAPDP		Syn3A	H2O + NADP+ + D-Glyceraldehyde 3-phosphate → NADPH + H+ + 3-Phospho-D-glycerate	✗		✗	✗	✗		✓		MMSYN1_0451
AMANK		Syn3A	ATP + N-Acetyl-D-mannosamine → ADP + H+ + N-Acetyl-D-mannosamine 6-phosphate	✗		✗	✗	✗		✓		MMSYN1_0495
CTPS2		Syn3A	H2O + ATP + L-Glutamine + UTP → ADP + Orthophosphate + L-Glutamate + CTP + H+	✗		✗	✗	✗		✓		MMSYN1_0129
CTPSDUMP		Syn3A	H2O + ATP + L-Glutamine + dUMP → ADP + Orthophosphate + L-Glutamate + H+ + dCMP	✗		✗	✗	✗		✓		MMSYN1_0129
dUTPase_transl		Syn3A	H2O + ATP + L-Alanyl-tRNA + L-Lysyl-tRNA + L-Leucyl-tRNA + L-Arginyl-tRNA(Arg) + Glutaminyl-tRNA + Glycyl-tRNA(Gly) + L-Seryl-tRNA(Ser) + L-Valyl-tRNA(Val) + L-Prolyl-tRNA(Pro) + L-Tyrosyl-tRNA(Tyr) + L-Aspartyl-tRNA(Asp) + L-Glutamyl-tRNA(Glu) + L-Histidyl-tRNA(His) + L-Threonyl-tRNA(Thr) + L-Cysteinyl-tRNA(Cys) + L-Isoleucyl-tRNA(Ile) + N-Formylmethionyl-tRNA + L-Asparaginyl-tRNA(Asn) + L-Pheny…	✗		✗	✗	✗		✓		MMSYN1_0201 and MMSYN1_0447
DUTPDP		Syn3A	H2O + dUTP → Diphosphate + H+ + dUMP	✗		✗	✗	✗		✓		MMSYN1_0447
DCMPDA		Syn3A	H2O + dCMP → Ammonia + dUMP	✗		✗	✗	✗		✓		MMSYN1_0515
FTHFCL		Syn3A	ATP + 5-formyltetrahydrofolate tri-L-glutamate → ADP + Phosphate + 5,10-methenyltetrahydrofolate tri-L-glutamate	✗		✗	✗	✗		✓		MMSYN1_0443
AMANPEr		Syn3A	N-Acetyl-D-glucosamine 6-phosphate ⇄ N-Acetyl-D-mannosamine 6-phosphate	✓		✗	✗	✗		✓		MMSYN1_0494
MTHFC		Syn3A	H2O + 5,10-methenyltetrahydrofolate tri-L-glutamate ⇄ 10-formyltetrahydrofolate tri-L-glutamate + H+	✓		✗	✗	✗		✓		MMSYN1_0684
MTHFD		Syn3A	NADP+ + 5,10-methylenetetrahydrofolate tri-L-glutamate v 5,10-methenyltetrahydrofolate tri-L-glutamate + NADPH	✓		✗	✗	✗		✓		MMSYN1_0684
G6PDA		Syn3A	H2O + D-Glucosamine 6-phosphate ⇄ Ammonia + H+ + D-Fructose 6-phosphate	✓		✗	✗	✗		✓		MMSYN1_0726
GHMT2		Syn3A	H2O + 5,10-methenyltetrahydrofolate tri-L-glutamate → 5-formyltetrahydrofolate tri-L-glutamate + H+	✗		✗	✗	✗		✓		MMSYN1_0799
ALA4abc		Syn3A	H2O + ATP + Tetra-L-alanine (e) → ADP + Orthophosphate + H+ + Tetra-L-alanine	✗		✗	✓	✗		✓		MMSYN1_0165 and MMSYN1_0166 and MMSYN1_0167 and MMSYN1_0168 and MMSYN1_0169
ARG4abc		Syn3A	H2O + ATP + Tetra-L-arginine (e) → ADP + Orthophosphate + H+ + Tetra-L-arginine	✗		✗	✓	✗		✓		MMSYN1_0165 and MMSYN1_0166 and MMSYN1_0167 and MMSYN1_0168 and MMSYN1_0169
ASN4abc		Syn3A	H2O + ATP + Tetra-L-asparagine (e) → ADP + Orthophosphate + H+ + Tetra-L-asparagine	✗		✗	✓	✗		✓		MMSYN1_0165 and MMSYN1_0166 and MMSYN1_0167 and MMSYN1_0168 and MMSYN1_0169
ASP4abc		Syn3A	H2O + ATP + Tetra-L-aspartate (e) → ADP + Orthophosphate + H+ + Tetra-L-aspartate	✗		✗	✓	✗		✓		MMSYN1_0165 and MMSYN1_0166 and MMSYN1_0167 and MMSYN1_0168 and MMSYN1_0169
GLN4abc		Syn3A	H2O + ATP + Tetra-L-glutamine (e) → ADP + Orthophosphate + H+ + Tetra-L-glutamine	✗		✗	✓	✗		✓		MMSYN1_0165 and MMSYN1_0166 and MMSYN1_0167 and MMSYN1_0168 and MMSYN1_0169
GLU4abc		Syn3A	H2O + ATP + Tetra-L-glutamate (e) → ADP + Orthophosphate + H+ + Tetra-L-glutamate	✗		✗	✓	✗		✓		MMSYN1_0165 and MMSYN1_0166 and MMSYN1_0167 and MMSYN1_0168 and MMSYN1_0169
GLY4abc		Syn3A	H2O + ATP + Tetra-glycine (e) → ADP + Orthophosphate + H+ + Tetra-glycine	✗		✗	✓	✗		✓		MMSYN1_0165 and MMSYN1_0166 and MMSYN1_0167 and MMSYN1_0168 and MMSYN1_0169
HIS4abc		Syn3A	H2O + ATP + Tetra-L-histidine (e) → ADP + Orthophosphate + H+ + Tetra-L-histidine	✗		✗	✓	✗		✓		MMSYN1_0165 and MMSYN1_0166 and MMSYN1_0167 and MMSYN1_0168 and MMSYN1_0169
ISO4abc		Syn3A	H2O + ATP + Tetra-L-isoleucine (e) → ADP + Orthophosphate + H+ + Tetra-L-isoleucine	✗		✗	✓	✗		✓		MMSYN1_0165 and MMSYN1_0166 and MMSYN1_0167 and MMSYN1_0168 and MMSYN1_0169
LEU4abc		Syn3A	H2O + ATP + Tetra-L-leucine (e) → ADP + Orthophosphate + H+ + Tetra-L-leucine	✗		✗	✓	✗		✓		MMSYN1_0165 and MMSYN1_0166 and MMSYN1_0167 and MMSYN1_0168 and MMSYN1_0169
LYS4abc		Syn3A	H2O + ATP + Tetra-L-lysine (e) → ADP + Orthophosphate + H+ + Tetra-L-lysine	✗		✗	✓	✗		✓		MMSYN1_0165 and MMSYN1_0166 and MMSYN1_0167 and MMSYN1_0168 and MMSYN1_0169
MET4abc		Syn3A	H2O + ATP + Tetra-L-methionine (e) → ADP + Orthophosphate + H+ + Tetra-L-methionine	✗		✗	✓	✗		✓		MMSYN1_0165 and MMSYN1_0166 and MMSYN1_0167 and MMSYN1_0168 and MMSYN1_0169
PHE4abc		Syn3A	H2O + ATP + Tetra-L-phenylalanine (e) → ADP + Orthophosphate + H+ + Tetra-L-phenylalanine	✗		✗	✓	✗		✓		MMSYN1_0165 and MMSYN1_0166 and MMSYN1_0167 and MMSYN1_0168 and MMSYN1_0169
PRO4abc		Syn3A	H2O + ATP + Tetra-L-proline (e) → ADP + Orthophosphate + H+ + Tetra-L-proline	✗		✗	✓	✗		✓		MMSYN1_0165 and MMSYN1_0166 and MMSYN1_0167 and MMSYN1_0168 and MMSYN1_0169
SER4abc		Syn3A	H2O + ATP + Tetra-L-serine (e) → ADP + Orthophosphate + H+ + Tetra-L-serine	✗		✗	✓	✗		✓		MMSYN1_0165 and MMSYN1_0166 and MMSYN1_0167 and MMSYN1_0168 and MMSYN1_0169
THR4abc		Syn3A	H2O + ATP + Tetra-L-threonine (e) → ADP + Orthophosphate + H+ + Tetra-L-threonine	✗		✗	✓	✗		✓		MMSYN1_0165 and MMSYN1_0166 and MMSYN1_0167 and MMSYN1_0168 and MMSYN1_0169
TRP4abc		Syn3A	H2O + ATP + Tetra-L-tryptophan (e) → ADP + Orthophosphate + H+ + Tetra-L-tryptophan	✗		✗	✓	✗		✓		MMSYN1_0165 and MMSYN1_0166 and MMSYN1_0167 and MMSYN1_0168 and MMSYN1_0169
TYR4abc		Syn3A	H2O + ATP + Tetra-L-tyrosine (e) → ADP + Orthophosphate + H+ + Tetra-L-tyrosine	✗		✗	✓	✗		✓		MMSYN1_0165 and MMSYN1_0166 and MMSYN1_0167 and MMSYN1_0168 and MMSYN1_0169
VAL4abc		Syn3A	H2O + ATP + Tetra-L-valine (e) → ADP + Orthophosphate + H+ + Tetra-L-valine	✗		✗	✓	✗		✓		MMSYN1_0165 and MMSYN1_0166 and MMSYN1_0167 and MMSYN1_0168 and MMSYN1_0169
LIPTA		Syn3A	H2O + ATP + PdhC + lipoyllysine (e) → ADP + Orthophosphate + L-Lysine + H+ + Lipoylprotein	✗		✗	✓	✗		✓		MMSYN1_0401
ALAt2r		Syn3A	L-Alanine (e) + H+ (e) → L-Alanine + H+	✗		✗	✓	✗		✓		MMSYN1_0876 or MMSYN1_0878
ARGt2r		Syn3A	L-Arginine (e) + H+ (e) → L-Arginine + H+	✗		✗	✓	✗		✓		MMSYN1_0876 or MMSYN1_0878
ASPt2r		Syn3A	H+ (e) + L-Asparagine (e) → H+ + L-Asparagine	✗		✗	✓	✗		✓		MMSYN1_0876 or MMSYN1_0878
CYSt2r		Syn3A	H+ (e) + L-Cysteine (e) → H+ + L-Cysteine	✗		✗	✓	✗		✓		MMSYN1_0876 or MMSYN1_0878
GLNt2r		Syn3A	L-Glutamine (e) + H+ (e) → L-Glutamine + H+	✗		✗	✓	✗		✓		MMSYN1_0876 or MMSYN1_0878
GLYt2r		Syn3A	Glycine (e) + H+ (e) → Glycine + H+	✗		✗	✓	✗		✓		MMSYN1_0876 or MMSYN1_0878
HISt2r		Syn3A	H+ (e) + L-Histidine (e) → H+ + L-Histidine	✗		✗	✓	✗		✓		MMSYN1_0876 or MMSYN1_0878
ISOt2r		Syn3A	H+ (e) + L-Isoleucine (e) → H+ + L-Isoleucine	✗		✗	✓	✗		✓		MMSYN1_0876 or MMSYN1_0878
LEUt2r		Syn3A	H+ (e) + L-Leucine (e) → H+ + L-Leucine	✗		✗	✓	✗		✓		MMSYN1_0876 or MMSYN1_0878
LYSt2r		Syn3A	L-Lysine (e) + H+ (e) → L-Lysine + H+	✗		✗	✓	✗		✓		MMSYN1_0876 or MMSYN1_0878
METt2r		Syn3A	L-Methionine (e) + H+ (e) → L-Methionine + H+	✗		✗	✓	✗		✓		MMSYN1_0876 or MMSYN1_0878
PHEt2r		Syn3A	L-Phenylalanine (e) + H+ (e) → L-Phenylalanine + H+	✗		✗	✓	✗		✓		MMSYN1_0876 or MMSYN1_0878
PROt2r		Syn3A	H+ (e) + L-Proline (e) → H+ + L-Proline	✗		✗	✓	✗		✓		MMSYN1_0876 or MMSYN1_0878
SERt2r		Syn3A	L-Serine (e) + H+ (e) → L-Serine + H+	✗		✗	✓	✗		✓		MMSYN1_0876 or MMSYN1_0878
THR2tr		Syn3A	H+ (e) + L-Threonine (e) → H+ + L-Threonine	✗		✗	✓	✗		✓		MMSYN1_0876 or MMSYN1_0878
TRPt2r		Syn3A	L-Tryptophan (e) + H+ (e) → L-Tryptophan + H+	✗		✗	✓	✗		✓		MMSYN1_0876 or MMSYN1_0878
TYRt2r		Syn3A	H+ (e) + L-Tyrosine (e) → H+ + L-Tyrosine	✗		✗	✓	✗		✓		MMSYN1_0876 or MMSYN1_0878
VALt2r		Syn3A	H+ (e) + L-Valine (e) → H+ + L-Valine	✗		✗	✓	✗		✓		MMSYN1_0876 or MMSYN1_0878
ASPt2pr		Syn3A	L-Aspartate (e) + H+ (e) → L-Aspartate + H+	✗		✗	✓	✗		✓		MMSYN1_0886
GLUt2pr		Syn3A	L-Glutamate (e) + H+ (e) → L-Glutamate + H+	✗		✗	✓	✗		✓		MMSYN1_0886
GAMpts		Syn3A	Phosphoenolpyruvate + D-Glucosamine (e) → Pyruvate + D-Glucosamine 6-phosphate	✗		✗	✓	✗		✓		MMSYN1_0233 and MMSYN1_0694 and MMSYN1_0234 and MMSYN1_0779
NACabc		Syn3A	H2O + ATP + Nicotinate (e) → ADP + Orthophosphate + H+ + Nicotinate	✗		✗	✓	✗		✓		MMSYN1_0641 and MMSYN1_0642 and MMSYN1_0643 and MMSYN1_0314
P5Pabc		Syn3A	H2O + ATP + Pyridoxal phosphate (e) → ADP + Orthophosphate + Pyridoxal phosphate + H+	✗		✗	✓	✗		✓		MMSYN1_0641 and MMSYN1_0642 and MMSYN1_0643 and MMSYN1_0345
5FTHFabc		Syn3A	H2O + ATP + Folinic acid (e) → ADP + Orthophosphate + H+ + Folinic acid	✗		✗	✓	✗		✓		MMSYN1_0641 and MMSYN1_0642 and MMSYN1_0643 and MMSYN1_0822
COAabc		Syn3A	H2O + ATP + CoA (e) → ADP + Orthophosphate + CoA + H+	✗		✗	✓	✗		✓		MMSYN1_0641 and MMSYN1_0642 and MMSYN1_0643 and MMSYN1_0836
RIBFLVabc		Syn3A	H2O + ATP + Riboflavin (e) → ADP + Orthophosphate + H+ + Riboflavin	✗		✗	✓	✗		✓		MMSYN1_0641 and MMSYN1_0642 and MMSYN1_0643 and MMSYN1_0877
Kt6		Syn3A	H2O + ATP + Potassium cation (e) + Sodium cation → ADP + Orthophosphate + H+ + Potassium cation + Sodium cation (e)	✗		✗	✓	✗		✓		MMSYN1_0685 and MMSYN1_0686
THMPPabc		Syn3A	H2O + ATP + Thiamin diphosphate (e) → ADP + Orthophosphate + Thiamin diphosphate + H+	✗		✗	✓	✗		✓		MMSYN1_0706 and MMSYN1_0707 and MMSYN1_0708
MG2abc		Syn3A	H2O + ATP + Magnesium cation (e) → ADP + Orthophosphate + H+ + Magnesium cation	✗		✗	✓	✗		✓		MMSYN1_0787
CA2abc		Syn3A	H2O + ATP + Calcium cation (e) → ADP + Orthophosphate + Calcium cation + H+	✗		✗	✓	✗		✓		MMSYN1_0879
ADNabc		Syn3A	H2O + ATP + Adenosine (e) → ADP + Orthophosphate + H+ + Adenosine	✗		✗	✓	✗		✓		MMSYN1_0008 and MMSYN1_0009 and MMSYN1_0010 and MMSYN1_0011
CYTDabc		Syn3A	H2O + ATP + Cytidine (e) → ADP + Orthophosphate + H+ + Cytidine	✗		✗	✓	✗		✓		MMSYN1_0008 and MMSYN1_0009 and MMSYN1_0010 and MMSYN1_0011
DADNabc		Syn3A	H2O + ATP + Deoxyadenosine (e) → ADP + Orthophosphate + H+ + Deoxyadenosine	✗		✗	✓	✗		✓		MMSYN1_0008 and MMSYN1_0009 and MMSYN1_0010 and MMSYN1_0011
DCYTabc		Syn3A	H2O + ATP + Deoxycytidine (e) → ADP + Orthophosphate + H+ + Deoxycytidine	✗		✗	✓	✗		✓		MMSYN1_0008 and MMSYN1_0009 and MMSYN1_0010 and MMSYN1_0011
DGSNabc		Syn3A	H2O + ATP + Deoxyguanosine (e) → ADP + Orthophosphate + H+ + Deoxyguanosine	✗		✗	✓	✗		✓		MMSYN1_0008 and MMSYN1_0009 and MMSYN1_0010 and MMSYN1_0011
DURIabc		Syn3A	H2O + ATP + Deoxyuridine (e) → ADP + Orthophosphate + H+ + Deoxyuridine	✗		✗	✓	✗		✓		MMSYN1_0008 and MMSYN1_0009 and MMSYN1_0010 and MMSYN1_0011
GSNabc		Syn3A	H2O + ATP + Guanosine (e) → ADP + Orthophosphate + H+ + Guanosine	✗		✗	✓	✗		✓		MMSYN1_0008 and MMSYN1_0009 and MMSYN1_0010 and MMSYN1_0011
THMDabc		Syn3A	H2O + ATP + Thymidine (e) → ADP + Orthophosphate + H+ + Thymidine	✗		✗	✓	✗		✓		MMSYN1_0008 and MMSYN1_0009 and MMSYN1_0010 and MMSYN1_0011
URIabc		Syn3A	H2O + ATP + Uridine (e) → ADP + Orthophosphate + H+ + Uridine	✗		✗	✓	✗		✓		MMSYN1_0008 and MMSYN1_0009 and MMSYN1_0010 and MMSYN1_0011
SPRMabc		Syn3A	H2O + ATP + Spermine (e) → ADP + Orthophosphate + H+ + Spermine	✗		✗	✓	✗		✓		MMSYN1_0195 and MMSYN1_0196 and MMSYN1_0197
ACALDt		Syn3A	Acetaldehyde ⇄ Acetaldehyde (e)	✓		✗	✓	✗		✓
AMANabc		Syn3A	H2O + ATP + N-Acetyl-D-mannosamine (e) → ADP + Orthophosphate + H+ + N-Acetyl-D-mannosamine	✗		✗	✓	✓		✓
BIOMASS		Syn3A	ATP + Orthophosphate + Protein + L-Glutamate + Glycine + DNA + L-Alanine + GTP + RNA + L-Lysine + L-Aspartate + L-Arginine + CTP + L-Serine + UTP + Calcium cation + L-Tryptophan + L-Phenylalanine + L-Tyrosine + L-Leucine + L-Histidine + L-Proline + Fatty acid + Diacylglycerol + L-Valine + Cholesterol + L-Threonine + Potassium cation + Magnesium cation + Phosphatidylglycerol + L-Isoleucine + Triac…	✗		✗	✗	✗		✗
CHOLt		Syn3A	Cholesterol ⇄ Cholesterol (e)	✓		✗	✓	✗		✓
CLt		Syn3A	Cl- ⇄ Cl- (e)	✓		✗	✓	✗		✓
CTPDP		Syn3A	H2O + CTP → Diphosphate + CMP + H+	✗		✗	✗	✓		✓
DCDPMP		Syn3A	H2O + dCDP → Orthophosphate + H+ + dCMP	✗		✗	✗	✓		✓
DCTPDP		Syn3A	H2O + dCTP → Diphosphate + H+ + dCMP	✗		✗	✗	✓		✓
DCTPMP		Syn3A	H2O + dCTP → Orthophosphate + H+ + dCDP	✗		✗	✗	✓		✓
PYRt2r		Syn3A	H+ + Pyruvate ⇄ H+ (e) + Pyruvate (e)	✓		✗	✓	✓		✓	✓
FORt		Syn3A	Formate ⇄ Formate (e)	✓		✗	✓	✗		✓
Ht		Syn3A	H+ (e) → H+	✗		✗	✓	✗		✓
NAt		Syn3A	Sodium cation (e) → Sodium cation	✗		✗	✓	✗		✓
NAt3		Syn3A	H+ (e) + Sodium cation → H+ + Sodium cation (e)	✗		✗	✓	✓		✓
NTD6		Syn3A	H2O + dAMP → Orthophosphate + Deoxyadenosine	✗		✗	✗	✓		✓
NTD8		Syn3A	H2O + dGMP → Orthophosphate + Deoxyguanosine	✗		✗	✗	✓		✓
TAGt		Syn3A	Triacylglycerol ⇄ Triacylglycerol (e)	✓		✗	✓	✗		✓
EX_5fthf_e		Syn3A	Folinic acid (e) ⇄ ∅	✓		✓	✗	✗		✗
EX_ala4_e		Syn3A	Tetra-L-alanine (e) ⇄ ∅	✓		✓	✗	✗		✗
EX_arg4_e		Syn3A	Tetra-L-arginine (e) ⇄ ∅	✓		✓	✗	✗		✗
EX_asn4_e		Syn3A	Tetra-L-asparagine (e) ⇄ ∅	✓		✓	✗	✗		✗
EX_asp4_e		Syn3A	Tetra-L-aspartate (e) ⇄ ∅	✓		✓	✗	✗		✗
EX_glu4_e		Syn3A	Tetra-L-glutamate (e) ⇄ ∅	✓		✓	✗	✗		✗
EX_gln4_e		Syn3A	Tetra-L-glutamine (e) ⇄ ∅	✓		✓	✗	✗		✗
EX_his4_e		Syn3A	Tetra-L-histidine (e) ⇄ ∅	✓		✓	✗	✗		✗
EX_ile4_e		Syn3A	Tetra-L-isoleucine (e) ⇄ ∅	✓		✓	✗	✗		✗
EX_leu4_e		Syn3A	Tetra-L-leucine (e) ⇄ ∅	✓		✓	✗	✗		✗
EX_lys4_e		Syn3A	Tetra-L-lysine (e) ⇄ ∅	✓		✓	✗	✗		✗
EX_met4_e		Syn3A	Tetra-L-methionine (e) ⇄ ∅	✓		✓	✗	✗		✗
EX_phe4_e		Syn3A	Tetra-L-phenylalanine (e) ⇄ ∅	✓		✓	✗	✗		✗
EX_pro4_e		Syn3A	Tetra-L-proline (e) ⇄ ∅	✓		✓	✗	✗		✗
EX_ser4_e		Syn3A	Tetra-L-serine (e) ⇄ ∅	✓		✓	✗	✗		✗
EX_thr4_e		Syn3A	Tetra-L-threonine (e) ⇄ ∅	✓		✓	✗	✗		✗
EX_trp4_e		Syn3A	Tetra-L-tryptophan (e) ⇄ ∅	✓		✓	✗	✗		✗
EX_tyr4_e		Syn3A	Tetra-L-tyrosine (e) ⇄ ∅	✓		✓	✗	✗		✗
EX_val4_e		Syn3A	Tetra-L-valine (e) ⇄ ∅	✓		✓	✗	✗		✗
EX_gly4_e		Syn3A	Tetra-glycine (e) ⇄ ∅	✓		✓	✗	✗		✗
EX_acald_e		Syn3A	Acetaldehyde (e) → ∅	✗		✓	✗	✗		✗
EX_acmana_e		Syn3A	N-Acetyl-D-mannosamine (e) → ∅	✗		✓	✗	✗		✗
EX_adn_e		Syn3A	Adenosine (e) ⇄ ∅	✓		✓	✗	✗		✗
EX_ca2_e		Syn3A	Calcium cation (e) ⇄ ∅	✓		✓	✗	✗		✗
EX_chsterol_e		Syn3A	Cholesterol (e) ⇄ ∅	✓		✓	✗	✗		✗
EX_cl_e		Syn3A	Cl- (e) ⇄ ∅	✓		✓	✗	✗		✗
EX_coa_e		Syn3A	CoA (e) ⇄ ∅	✓		✓	✗	✗		✗
EX_dad_2_e		Syn3A	Deoxyadenosine (e) ⇄ ∅	✓		✓	✗	✗		✗
EX_dgsn_e		Syn3A	Deoxyguanosine (e) ⇄ ∅	✓		✓	✗	✗		✗
EX_duri_e		Syn3A	Deoxyuridine (e) ⇄ ∅	✓		✓	✗	✗		✗
EX_for_e		Syn3A	Formate (e) ⇄ ∅	✓		✓	✗	✗		✗
EX_gam_e		Syn3A	D-Glucosamine (e) → ∅	✗		✓	✗	✗		✗
EX_gsn_e		Syn3A	Guanosine (e) ⇄ ∅	✓		✓	✗	✗		✗
EX_k_e		Syn3A	Potassium cation (e) ⇄ ∅	✓		✓	✗	✗		✗
EX_lplys__L_e		Syn3A	lipoyllysine (e) ⇄ ∅	✓		✓	✗	✗		✗
EX_mg2_e		Syn3A	Magnesium cation (e) ⇄ ∅	✓		✓	✗	✗		✗
EX_na1_e		Syn3A	Sodium cation (e) ⇄ ∅	✓		✓	✗	✗		✗
EX_pydx5p_e		Syn3A	Pyridoxal phosphate (e) ⇄ ∅	✓		✓	✗	✗		✗
EX_pyr_e		Syn3A	Pyruvate (e) ⇄ ∅	✓		✓	✗	✗		✗	✗
EX_sprm_e		Syn3A	Spermine (e) ⇄ ∅	✓		✓	✗	✗		✗
EX_tag_e		Syn3A	Triacylglycerol (e) ⇄ ∅	✓		✓	✗	✗		✗
EX_thmpp_e		Syn3A	Thiamin diphosphate (e) ⇄ ∅	✓		✓	✗	✗		✗
EX_thymd_e		Syn3A	Thymidine (e) ⇄ ∅	✓		✓	✗	✗		✗
EX_uri_e		Syn3A	Uridine (e) ⇄ ∅	✓		✓	✗	✗		✗
EX_biomass_c		Syn3A	Biomass (c) ⇄ ∅	✗		✓	✗	✗		✗
