# Supplementary material for: Essential metabolism for a minimal cell
Source: eLife. 2019 Jan 18;8:e36842. doi: 10.7554/eLife.36842 (PMC6609329; doi:10.7554/eLife.36842)
Supplement: Supplementary file 7. [file elife-36842-supp7.xlsx]

## Sheet: Reaction Vmax numbers
Reaction number	Reaction equation	Reaction ID	EC number	Subsystem	Reversibility	GPR rule	Abundance	GPR effective abundance	Kcat (per sec, forward)	Kcat (per sec, backward)	Vmax (mmol/gDwh)	Vmin (mmol/gDwh)	Flux [mmol/gDWh]		LEGEND NF : Not found NA: Not applicable
S001	[c]: D-glucose 6-phosphate <==> D-fructose 6-phosphate	PGI	5.3.1.9	Central metabolism	R	MMSYN1_0445	266	266	929	650	144.806	-101.318	7.26488
S002	[c]: D-fructose 6-phosphate + ATP --> ADP + D-fructose 1,6-bisphosphate + H+	PFK	2.7.1.11	Central metabolism	I	MMSYN1_0220	458	458	111	NA	29.7906	NA	7.20889
S003	[c]: D-fructose 1,6-bisphosphate <==> dihydroxyacetone phosphate + Glyceraldehyde 3-phosphate	FBA	4.1.2.13	Central metabolism	R	MMSYN1_0131	227	227	2.95	0.002	0.392408	-0.000266039	7.20889
S004	[c]: dihydroxyacetone phosphate <==> Glyceraldehyde 3-phosphate	TPI	5.3.1.1	Central metabolism	R	MMSYN1_0727	410	410	68330	367	16416.7	-88.1739	7.20889
S005	[c]: NAD+ + Phosphate + Glyceraldehyde 3-phosphate <==> NADH + H+ + 3-Phospho-D-glyceroyl phosphate	GAPD	1.2.1.12	Central metabolism	R	MMSYN1_0607	1355	1355	70	73.56	55.5812	-58.4079	14.3898
S006	[c]: NADP+ + Glyceraldehyde 3-phosphate + H2O --> NADPH + (2) H+ + 3-Phospho-D-glycerate	GAPDP	1.2.1.9	Central metabolism	I	MMSYN1_0451	248	248	60	NA	8.71953	NA	0
S007	[c]: ADP + 3-Phospho-D-glyceroyl phosphate <==> 3-phospho-D-glycerate + ATP	PGK	2.7.2.3	Central metabolism	R	MMSYN1_0606	411	411	2631.5	529.4	633.775	-127.502	14.123
S008	[c]: 3-phospho-D-glycerate <==> D-Glycerate 2-phosphate	PGM	5.4.2.12	Central metabolism	R	MMSYN1_0729	322	322	102	199	19.2463	-37.5491	14.3898
S009	[c]: D-Glycerate 2-phosphate <==> phosphoenolpyruvate + H2O	ENO	4.2.1.11	Central metabolism	R	MMSYN1_0213	998	998	52.7	15.47	30.8199	-9.04713	14.3898
S010	[c]: ADP + phosphoenolpyruvate + H+ --> ATP + pyruvate	PYK	2.7.1.40	Central metabolism	I	MMSYN1_0221	551	551	3204	NA	1034.51	NA	6.34285
S011	[c]: N-acetyl-D-mannosamine + ATP --> ADP + N-acetyl-D-mannosamine 6-phosphate + H+	AMANK	2.7.1.60	Central metabolism	I	MMSYN1_0495	7	7	NF	NA	NA	NA	0
S012	[c]: N-acetyl-D-mannosamine 6-phosphate <==> N-acetyl-D-glucosamine 6-phosphate	AMANPEr	5.1.3.9	Central metabolism	R	MMSYN1_0494	30	30	NF	NF	NA	NA	0
S013	[c]: N-acetyl-D-glucosamine 6-phosphate + H2O --> D-glucosamine 6-phosphate + acetate	AGDC	3.5.1.25	Central metabolism	I	MMSYN1_0493	573	573	110	NA	36.9349	NA	0
S014	[c]: D-glucosamine 6-phosphate + H2O <==> D-fructose 6-phosphate + NH3 + H+	G6PDA	3.5.99.6	Central metabolism	R	MMSYN1_0726	142	142	2	455	0.166421	-37.8608	0
S015	[c]: D-mannose 6-phosphate <==> D-fructose 6-phosphate	MAN6PI	5.3.1.8	Central metabolism	R	MMSYN1_0435	44	44	1.38	141	0.0355813	-3.63548	0
S016	[c]: NADH + H+ + pyruvate <==> L-lactate + NAD+	LDH_L	1.1.1.27	Central metabolism	R	MMSYN1_0475	1100	1100	643	32	414.471	-20.6268	7.48979
S017	[c]: lipoyl-PdhC + H+ + pyruvate --> S-acetyldihydrolipoyl-PdhC + CO2	PDH_E1	1.2.4.1	Central metabolism	I		NA	NA	0.05	NA	NA	NA	6.9
S018	[c]: S-acetyldihydrolipoyl-PdhC + CoA --> acetyl-CoA + dihydrolipoyl-PdhC	PDH_E2	2.3.1.12	Central metabolism	I	MMSYN1_0227	182	182	NF	2.4	NA	-0.25596	6.9
S019	[c]: acetaldehyde + lipoyl-PdhC + CoA --> acetyl-CoA + dihydrolipoyl-PdhC	PDH_acald	-	Central metabolism	I	MMSYN1_0227	182	182	NA	NA	NA	NA	0
S020	[c]: dihydrolipoyl-PdhC + NAD+ --> lipoyl-PdhC + NADH + H+	PDH_E3	1.8.1.4	Central metabolism	I	MMSYN1_0228	182	182	160	340	17.064	-36.2611	6.9
S021	[c]: acetyl-CoA + Phosphate <==> acetyl phosphate + CoA	PTAr	2.3.1.8	Central metabolism	R	MMSYN1_0229	300	300	29.6	227	5.20359	-39.9059	6.9
S022	[c]: ADP + acetyl phosphate <==> acetate + ATP	ACKr	2.7.2.1	Central metabolism	R	MMSYN1_0230	NF	NF	320.56	246.74	NA	NA	6.9
S023	[c]: (2) NADH + O2 + (2) H+ --> (2) H2O + (2) NAD+	NOX	1.6.3.4	Central metabolism	I		NA	NA	NF	NA	NA	NA	6.9
S024	[c]: D-erythrose 4-phosphate + D-fructose 6-phosphate <==> sedoheptulose 7-phosphate + Glyceraldehyde 3-phosphate	TALA	2.2.1.2	Central metabolism	R		NA	NA	0.22	13	NA	NA	0.027992
S025	[c]: sedoheptulose 7-phosphate + Glyceraldehyde 3-phosphate <==> D-xylulose 5-phosphate + D-ribose 5-phosphate	TKT1	2.2.1.1	Central metabolism	R	MMSYN1_0316	148	148	99	6.3	8.58593	-0.546377	0.027992
S026	[c]: D-fructose 6-phosphate + Glyceraldehyde 3-phosphate <==> D-xylulose 5-phosphate + D-erythrose 4-phosphate	TKT2	2.2.1.1	Central metabolism	R	MMSYN1_0316	148	148	99	6.3	8.58593	-0.546377	0.027992
S027	[c]: D-xylulose 5-phosphate <==> D-ribulose 5-phosphate	RPE	5.1.3.1	Central metabolism	R	MMSYN1_0262	209	209	1300	100	159.213	-12.2472	0.055984
S028	[c]: D-ribulose 5-phosphate <==> D-ribose 5-phosphate	RPI	5.3.1.6	Central metabolism	R	MMSYN1_0800	207	207	2	120	0.2426	-14.556	0.055984
S029	[c]: D-ribose 5-phosphate + ATP <==> AMP + 5-phospho-alpha-D-ribose 1-diphosphate + H+	PRPPS	2.7.6.1	Central metabolism	R	MMSYN1_0831	315	315	0.66	NF	0.121827	NA	0.180328
S030	[c]: D-ribose 1-phosphate <==> D-ribose 5-phosphate	PPM	5.4.2.7	Central metabolism	R	MMSYN1_0733	274	274	NF	10.2	NA	-1.63772	0.0963522
S031	[c]: 2-deoxy-D-ribose 1-phosphate <==> 2-deoxy-D-ribose 5-phosphate	PPM2	5.4.2.7	Central metabolism	R	MMSYN1_0733	274	274	173	NF	27.7771	NA	0
S032	[c]: 2-deoxy-D-ribose 5-phosphate <==> acetaldehyde + Glyceraldehyde 3-phosphate	DRPA	4.1.2.4	Central metabolism	R	MMSYN1_0732	171	171	7.55	NF	0.756542	NA	0
S033	[c]: adenine + 5-phospho-alpha-D-ribose 1-diphosphate --> AMP + Diphosphate	ADPT	2.4.2.7	Nucleotide metabolism	I	MMSYN1_0413	363	363	9.33	0.0095	1.98463	-0.00202079	0.0524694
S034	[c]: adenosine + Phosphate <==> D-ribose 1-phosphate + adenine	PUNP1	2.4.2.1	Nucleotide metabolism	R	MMSYN1_0747	629	629	3.5	120	1.29006	-44.2305	0.0524694
S035	[c]: AMP + ATP <==> (2) ADP	ADK1	2.7.4.3	Nucleotide metabolism	R	MMSYN1_0651	213	213	0.053	783	0.00661524	-97.7308	2.23732
S036	[c]: ADP + reduced thioredoxin --> dADP + H2O + oxidized thioredoxin	RNDR1	1.17.4.1	Nucleotide metabolism	I	MMSYN1_0771 AND MMSYN1_0772 AND MMSYN1_0773	min(382,50,297)	50	NF	NA	NA	NA	0.0046604
S037	[c]: oxidized thioredoxin + H+ + NADPH --> NADP+ + reduced thioredoxin	TRDR	1.8.1.9	Nucleotide metabolism	I	MMSYN1_0819 AND MMSYN1_0065	min(100,426)	100	94.17	22	5.51827	-1.28918	0.0046604
S038	[c]: H2O + Diphosphate --> (2) Phosphate + H+	PPA	3.6.1.1	Nucleotide metabolism	I	MMSYN1_0344	190	190	817	NA	90.9632	NA	3.14336
S039	[c]: deoxyadenosine + Phosphate <==> 2-deoxy-D-ribose 1-phosphate + adenine	PUNP2	2.4.2.1	Nucleotide metabolism	R	MMSYN1_0747	629	629	3.5	145	1.29006	-53.4452	0
S040	[c]: deoxyadenosine + ATP --> ADP + H+ + dAMP	DADNK	2.7.1.76	Nucleotide metabolism	I	MMSYN1_0330 OR MMSYN1_0382	sum(63,23)	86	1.11	NA	0.0559386	NA	0.0184666
S041	[c]: dAMP + ATP <==> dADP + ADP	DADK	2.7.4.11	Nucleotide metabolism	R	MMSYN1_0651	213	213	NF	NF	NA	NA	0.0184666
S042	[c]: phosphoenolpyruvate + dADP + H+ --> dATP + pyruvate	PYK5	2.7.1.40	Nucleotide metabolism	I	MMSYN1_0221	551	551	3204	NA	1034.51	NA	0
S043	[c]: dADP + 3-Phospho-D-glyceroyl phosphate <==> 3-phospho-D-glycerate + dATP	PGK2	2.7.2.3	Nucleotide metabolism	R	MMSYN1_0606	411	411	2631.5	529.4	633.775	-127.502	0.0231269
S044	[c]: 5-phospho-alpha-D-ribose 1-diphosphate + guanine --> GMP + Diphosphate	GUAPRT	2.4.2.8	Nucleotide metabolism	I	MMSYN1_0216	439	439	0.0139	NA	0.00357577	NA	0.0438828
S045	[c]: guanosine + Phosphate <==> D-ribose 1-phosphate + guanine	PUNP3	2.4.2.1	Nucleotide metabolism	R	MMSYN1_0747	629	629	4	48	1.47435	-17.6922	0.0438828
S046	[c]: GMP + ATP <==> ADP + GDP	GK1	2.7.4.8	Nucleotide metabolism	R	MMSYN1_0203	186	186	52	NF	5.6677	NA	0.236383
S047	[c]: reduced thioredoxin + GDP --> H2O + oxidized thioredoxin + dGDP	RNDR2	1.17.4.1	Nucleotide metabolism	I	MMSYN1_0771 AND MMSYN1_0772 AND MMSYN1_0773	min(382,50,297)	50	NF	NA	NA	NA	0
S048	[c]: phosphoenolpyruvate + H+ + GDP --> GTP + pyruvate	PYK3	2.7.1.40	Nucleotide metabolism	I	MMSYN1_0221	551	551	3204	NA	1034.51	NA	0
S049	[c]: GDP + 3-Phospho-D-glyceroyl phosphate <==> GTP + 3-phospho-D-glycerate	PGK3	2.7.2.3	Nucleotide metabolism	R	MMSYN1_0606	411	411	2631.5	529.4	633.775	-127.502	0.236383
S050	[c]: deoxyguanosine + Phosphate <==> 2-deoxy-D-ribose 1-phosphate + guanine	PUNP4	2.4.2.1	Nucleotide metabolism	R	MMSYN1_0747	629	629	5.1	48	1.8798	-17.6922	0
S051	[c]: deoxyguanosine + ATP --> ADP + H+ + dGMP	DGSNK	2.7.1.113	Nucleotide metabolism	I	MMSYN1_0330 OR MMSYN1_0382	sum(63,23)	86	0.61	NA	0.030741	NA	0.0073046
S052	[c]: ATP + dGMP <==> ADP + dGDP	DGK1	2.7.4.8	Nucleotide metabolism	R	MMSYN1_0203	186	186	43	NF	4.68675	NA	0.0073046
S053	[c]: phosphoenolpyruvate + dGDP + H+ --> dGTP + pyruvate	PYK6	2.7.1.40	Nucleotide metabolism	I	MMSYN1_0221	551	551	3204	NA	1034.51	NA	0
S054	[c]: dGDP + 3-Phospho-D-glyceroyl phosphate <==> 3-phospho-D-glycerate + dGTP	PGK4	2.7.2.3	Nucleotide metabolism	R	MMSYN1_0606	411	411	2631.5	529.4	633.775	-127.502	0.0073046
S055	[c]: uracil + 5-phospho-alpha-D-ribose 1-diphosphate --> UMP + Diphosphate	UPPRT	2.4.2.9	Nucleotide metabolism	I	MMSYN1_0798	362	362	0.36	0.0015	0.0763662	-0.000318193	0.0839401
S056	[c]: UMP + ATP <==> ADP + UDP	UMPK	2.7.4.22	Nucleotide metabolism	R	MMSYN1_0537	144	144	145	NF	12.2355	NA	0.29954
S057	[c]: phosphoenolpyruvate + H+ + UDP --> UTP + pyruvate	PYK2	2.7.1.40	Nucleotide metabolism	I	MMSYN1_0221	551	551	3204	NA	1034.51	NA	0.434663
S058	[c]: reduced thioredoxin + UDP --> H2O + oxidized thioredoxin + dUDP	RNDR4	1.17.4.1	Nucleotide metabolism	I	MMSYN1_0771 AND MMSYN1_0772 AND MMSYN1_0773	min(382,50,297)	50	NF	NA	NA	NA	0
S059	[c]: CMP + ATP <==> ADP + CDP	CYTK1	2.7.4.25	Nucleotide metabolism	R	MMSYN1_0347	66	66	52	NF	2.01112	NA	0.181836
S060	[c]: phosphoenolpyruvate + CDP + H+ --> CTP + pyruvate	PYK4	2.7.1.40	Nucleotide metabolism	I	MMSYN1_0221	551	551	3204	NA	1034.51	NA	0.181836
S061	[c]: CDP + reduced thioredoxin --> H2O + oxidized thioredoxin + dCDP	RNDR3	1.17.4.1	Nucleotide metabolism	I	MMSYN1_0771 AND MMSYN1_0772 AND MMSYN1_0773	min(382,50,297)	50	12.9	NA	0.377964	NA	0
S062	[c]: deoxycytidine + ATP --> ADP + dCMP + H+	DCYTK	2.7.1.74	Nucleotide metabolism	I	MMSYN1_0330 OR MMSYN1_0382	sum(63,23)	86	1.23	NA	0.061986	NA	0.0073101
S063	[c]: dCMP + ATP <==> ADP + dCDP	CYTK2	2.7.4.25	Nucleotide metabolism	R	MMSYN1_0347	66	66	30	NF	1.16026	NA	0.0073101
S064	[c]: phosphoenolpyruvate + dCDP + H+ --> dCTP + pyruvate	PYK7	2.7.1.40	Nucleotide metabolism	I	MMSYN1_0221	551	551	3204	NA	1034.51	NA	0.0073101
S065	[c]: deoxyuridine + ATP --> ADP + dUMP + H+	DURIK1	2.7.1.21	Nucleotide metabolism	I	MMSYN1_0140	202	202	0.2598	NA	0.0307525	NA	0
S066	[c]: thymidine + ATP --> ADP + dTMP + H+	TMDK1	2.7.1.21	Nucleotide metabolism	I	MMSYN1_0140	202	202	0.0979	NA	0.0115884	NA	0.0231307
S067	[c]: dTMP + ATP <==> ADP + dTDP	TMPK	2.7.4.9	Nucleotide metabolism	R	MMSYN1_0045	92	92	0.19	NF	0.0102431	NA	0.0231307
S068	[c]: phosphoenolpyruvate + dTDP + H+ --> dTTP + pyruvate	PYK8	2.7.1.40	Nucleotide metabolism	I	MMSYN1_0221	551	551	3204	NA	1034.51	NA	0.0231307
S069	[c]: phosphoenolpyruvate + dUDP + H+ --> dUTP + pyruvate	PYK9	2.7.1.40	Nucleotide metabolism	I	MMSYN1_0221	551	551	3204	NA	1034.51	NA	0
S070	[c]: ATP + UTP + L-glutamine + H2O --> ADP + CTP + L-glutamate + Phosphate + (2) H+	CTPS2	6.3.4.2	Nucleotide metabolism	I	MMSYN1_0129	306	306	2.85	NA	0.511042	NA	0.0348813
S071	[c]: ATP + dUMP + L-glutamine + H2O --> ADP + dCMP + L-glutamate + Phosphate + (2) H+	CTPSDUMP	-	Nucleotide metabolism	I	MMSYN1_0129	306	306	NA	NA	NA	NA	0
S072	[c]: dCMP + H2O --> NH3 + dUMP	DCMPDA	3.5.4.12	Nucleotide metabolism	I	MMSYN1_0515	128	128	960	NA	72.0065	NA	0
S073	[c]: dUTP + H2O --> dUMP + diphosphate + H+	DUTPDP	3.6.1.23	Nucleotide metabolism	I	MMSYN1_0447	10	10	1.22	NA	0.00714908	NA	0
S074	[c]: dCTP + H2O --> dCMP + diphosphate + H+	DCTPDP	3.6.1.12	Nucleotide metabolism	I		NA	NA	1.37	NA	NA	NA	0
S075	[c]: dCTP + H2O --> dCDP + phosphate + H+	DCTPMP	3.6.1.15	Nucleotide metabolism	I		NA	NA	0.3	1.12	NA	NA	0
S076	[c]: dCDP + H2O --> dCMP + phosphate + H+	DCDPMP	3.6.1.12	Nucleotide metabolism	I		NA	NA	NF	NA	NA	NA	0
S077	[c]: CTP + H2O --> CMP + diphosphate + H+	CTPDP	3.6.1.65	Nucleotide metabolism	I		NA	NA	9.28	NA	NA	NA	0
S078	[c]: dTMP + H2O --> thymidine + phosphate	NTD5	3.1.3.89	Nucleotide metabolism	I		NA	NA	0.16	NA	NA	NA	0
S079	[c]: dUMP + H2O --> deoxyuridine + phosphate	NTD1	3.1.3.89	Nucleotide metabolism	I		NA	NA	0.23	NA	NA	NA	0
S080	[c]: dGMP + H2O --> deoxyguanosine + phosphate	NTD8	3.1.3.89	Nucleotide metabolism	I		NA	NA	0.2	NA	NA	NA	0
S081	[c]: dAMP + H2O --> deoxyadenosine + phosphate	NTD6	3.1.3.89	Nucleotide metabolism	I		NA	NA	0.14	NA	NA	NA	0
S082	[c]: GMP + H2O --> guanosine + phosphate	NTD9	3.1.3.5	Nucleotide metabolism	I		NA	NA	11	NA	NA	NA	0
S083	[c]: glycerol + ATP --> Glycerol 3-phosphate + ADP + H+	GLYK	2.7.1.30	Lipid metabolism	I	MMSYN1_0218	396	396	4900	NA	1137.05	NA	0.070923
S084	[c]: apoprotein (acyl carrier protein) + CoA --> adenosine 3',5'-bisphosphate + acyl carrier protein + H+	ACPS	2.7.8.7	Lipid metabolism	I	MMSYN1_0513 AND MMSYN1_0621	min(1,138)	1	0.00083	NA	4.86372e-07	NA	7.2e-06
S085	[c]: adenosine 3',5'-bisphosphate + H2O --> AMP + Phosphate	BPNT	3.1.3.7	Lipid metabolism	I	MMSYN1_0139	187	187	5.4	NA	0.591733	NA	7.2e-06
S086	[c]: fatty acid + ATP <==> acyl phosphate + ADP	FAKr	-	Lipid metabolism	R	MMSYN1_0420 AND MMSYN1_0616 AND MMSYN1_0617	min(205,366,205)	205	NA	NA	NA	NA	0.0861735
S087	[c]: acyl phosphate + acyl carrier protein <==> ACP-R + phosphate	ACPPAT	2.3.1.n2	Lipid metabolism	R	MMSYN1_0419	140	140	NA	NA	NA	NA	0.0430868
S088	[c]: acyl phosphate + Glycerol 3-phosphate --> 1-acyl-glycerol 3-phosphate + phosphate	APG3PAT	2.3.1.n3	Lipid metabolism	I	MMSYN1_0117	1	1	NA	NA	NA	NA	0.0430868
S089	[c]: ACP-R + 1-acyl-glycerol 3-phosphate --> phosphatidic acid + acyl carrier protein	AGPAT	2.3.1.51	Lipid metabolism	I	MMSYN1_0512	170	170	NF	NA	NA	NA	0.0430868
S090	[c]: phosphatidic acid + CTP + H+ --> CDP-diacylglycerol + Diphosphate	DASYN	2.7.7.41	Lipid metabolism	I	MMSYN1_0304	1	1	8.92	NA	0.00522703	NA	0.0278362
S091	[c]: CDP-diacylglycerol + Glycerol 3-phosphate --> CMP + phosphatidylglycerol 3-phosphate + H+	PGSA	2.7.8.5	Lipid metabolism	I	MMSYN1_0875	36	36	NF	NA	NA	NA	0.0278362
S092	[c]: H2O + phosphatidylglycerol 3-phosphate --> Phosphate + phosphatidylglycerol	PGPP	3.1.3.27	Lipid metabolism	I	MMSYN1_0214	NF	NF	24	650	NA	NA	0.0278362
S093	[c]: (2) phosphatidylglycerol --> cardiolipin + glycerol	CLPNS	2.7.8.-	Lipid metabolism	I	MMSYN1_0147	15	15	NA	NA	NA	NA	0.00718
S094	[c]: H2O + phosphatidic acid --> 1,2-diacylglycerol + Phosphate	PAPA	3.1.3.4	Lipid metabolism	I		NA	NA	NF	NA	NA	NA	0.0152505
S095	[c]: D-glucose 6-phosphate <==> D-glucose 1-phosphate	PGMT	5.4.2.5	Lipid metabolism	R	MMSYN1_0733	274	274	NF	2.5	NA	0.401403	0.135123
S096	[c]: D-glucose 1-phosphate + UTP + H+ <==> UDP-glucose + Diphosphate	GALU	2.7.7.9	Lipid metabolism	R	MMSYN1_0115	336	336	58.05	6.35	11.4296	-1.25027	0.135123
S097	[c]: UDP-glucose <==> UDP-galactose	UDPG4E	5.1.3.2	Lipid metabolism	R	MMSYN1_0813	86	86	760	199.1	38.3003	-10.0337	0.135123
S098	[c]: UDP-galactose <==> UDP-galactofuranose	UDPGALM	5.4.99.9	Lipid metabolism	R	MMSYN1_0814	78	78	66	NF	3.01668	NA	0.135123
S099	[c]: 1,2-diacylglycerol + UDP-galactofuranose --> Gal-DAG + H+ + UDP	DAGGALT	2.4.1.46	Lipid metabolism	I	MMSYN1_0114 OR MMSYN1_0697	sum(43,119)	163	NF	NA	NA	NA	0.0059231
S100	[c]: (88) UDP-galactofuranose --> UDP-galactan + (87) UDP + (87) H+	PSSYN	2.4.1.-	Lipid metabolism	I	MMSYN1_0113	79	79	NA	NA	NA	NA	0.0014682
S101	[c]: UDP-galactan + 1,2-diacylglycerol --> lipogalactan + H+ + UDP	DAGPST	2.4.1.-	Lipid metabolism	I	MMSYN1_0114	43	43	NA	NA	NA	NA	0.0014682
S102	[c]: Tetra-L-arginine + (3) H2O --> (4) L-arginine	ARG4P	3.4.-	Amino acid metabolism	I	MMSYN1_0133 OR MMSYN1_0305 OR MMSYN1_0444 OR MMSYN1_0479	sum(88,413,235,66)	802	NA	NA	NA	NA	0
S103	[c]: Tetra-L-aspartate + (3) H2O --> (4) L-aspartate	ASP4P	3.4.-	Amino acid metabolism	I	MMSYN1_0133 OR MMSYN1_0305 OR MMSYN1_0444 OR MMSYN1_0479	sum(88,413,235,66)	802	NA	NA	NA	NA	0
S104	[c]: Tetra-L-glutamate + (3) H2O --> (4) L-glutamate	GLU4P	3.4.-	Amino acid metabolism	I	MMSYN1_0133 OR MMSYN1_0305 OR MMSYN1_0444 OR MMSYN1_0479	sum(88,413,235,66)	802	NA	NA	NA	NA	0
S105	[c]: Tetra-glycine + (3) H2O --> (4) glycine	GLY4P	3.4.-	Amino acid metabolism	I	MMSYN1_0133 OR MMSYN1_0305 OR MMSYN1_0444 OR MMSYN1_0479	sum(88,413,235,66)	802	NA	NA	NA	NA	0
S106	[c]: Tetra-L-isoleucine + (3) H2O --> (4) L-isoleucine	ISO4P	3.4.-	Amino acid metabolism	I	MMSYN1_0133 OR MMSYN1_0305 OR MMSYN1_0444 OR MMSYN1_0479	sum(88,413,235,66)	802	NA	NA	NA	NA	0
S107	[c]: Tetra-L-alanine + (3) H2O --> (4) L-alanine	ALA4P	3.4.-	Amino acid metabolism	I	MMSYN1_0133 OR MMSYN1_0305 OR MMSYN1_0444 OR MMSYN1_0479	sum(88,413,235,66)	802	NA	NA	NA	NA	0
S108	[c]: Tetra-L-asparagine + (3) H2O --> (4) L-asparagine	ASN4P	3.4.-	Amino acid metabolism	I	MMSYN1_0133 OR MMSYN1_0305 OR MMSYN1_0444 OR MMSYN1_0479	sum(88,413,235,66)	802	NA	NA	NA	NA	0
S109	[c]: Tetra-L-leucine + (3) H2O --> (4) L-leucine	LEU4P	3.4.-	Amino acid metabolism	I	MMSYN1_0133 OR MMSYN1_0305 OR MMSYN1_0444 OR MMSYN1_0479	sum(88,413,235,66)	802	NA	NA	NA	NA	0
S110	[c]: Tetra-L-glutamine + (3) H2O --> (4) L-glutamine	GLN4P	3.4.-	Amino acid metabolism	I	MMSYN1_0133 OR MMSYN1_0305 OR MMSYN1_0444 OR MMSYN1_0479	sum(88,413,235,66)	802	NA	NA	NA	NA	0
S111	[c]: Tetra-L-histidine + (3) H2O --> (4) L-histidine	HIS4P	3.4.-	Amino acid metabolism	I	MMSYN1_0133 OR MMSYN1_0305 OR MMSYN1_0444 OR MMSYN1_0479	sum(88,413,235,66)	802	NA	NA	NA	NA	0
S112	[c]: Tetra-L-lysine + (3) H2O --> (4) L-lysine	LYS4P	3.4.-	Amino acid metabolism	I	MMSYN1_0133 OR MMSYN1_0305 OR MMSYN1_0444 OR MMSYN1_0479	sum(88,413,235,66)	802	NA	NA	NA	NA	0
S113	[c]: Tetra-L-proline + (3) H2O --> (4) L-proline	PRO4P	3.4.-	Amino acid metabolism	I	MMSYN1_0133 OR MMSYN1_0305 OR MMSYN1_0444 OR MMSYN1_0479	sum(88,413,235,66)	802	NA	NA	NA	NA	0
S114	[c]: Tetra-L-phenylalanine + (3) H2O --> (4) L-phenylalanine	PHE4P	3.4.-	Amino acid metabolism	I	MMSYN1_0133 OR MMSYN1_0305 OR MMSYN1_0444 OR MMSYN1_0479	sum(88,413,235,66)	802	NA	NA	NA	NA	0
S115	[c]: Tetra-L-threonine + (3) H2O --> (4) L-threonine	THR4P	3.4.-	Amino acid metabolism	I	MMSYN1_0133 OR MMSYN1_0305 OR MMSYN1_0444 OR MMSYN1_0479	sum(88,413,235,66)	802	NA	NA	NA	NA	0
S116	[c]: Tetra-L-tryptophan + (3) H2O --> (4) L-tryptophan	TRP4P	3.4.-	Amino acid metabolism	I	MMSYN1_0133 OR MMSYN1_0305 OR MMSYN1_0444 OR MMSYN1_0479	sum(88,413,235,66)	802	NA	NA	NA	NA	0
S117	[c]: Tetra-L-tyrosine + (3) H2O --> (4) L-tyrosine	TYR4P	3.4.-	Amino acid metabolism	I	MMSYN1_0133 OR MMSYN1_0305 OR MMSYN1_0444 OR MMSYN1_0479	sum(88,413,235,66)	802	NA	NA	NA	NA	0
S118	[c]: Tetra-L-valine + (3) H2O --> (4) L-valine	VAL4P	3.4.-	Amino acid metabolism	I	MMSYN1_0133 OR MMSYN1_0305 OR MMSYN1_0444 OR MMSYN1_0479	sum(88,413,235,66)	802	NA	NA	NA	NA	0
S119	[c]: Tetra-L-serine + (3) H2O --> (4) L-serine	SER4P	3.4.-	Amino acid metabolism	I	MMSYN1_0133 OR MMSYN1_0305 OR MMSYN1_0444 OR MMSYN1_0479	sum(88,413,235,66)	802	NA	NA	NA	NA	0
S120	[c]: Tetra-L-methionine + (3) H2O --> (4) L-methionine	MET4P	3.4.-	Amino acid metabolism	I	MMSYN1_0133 OR MMSYN1_0305 OR MMSYN1_0444 OR MMSYN1_0479	sum(88,413,235,66)	802	NA	NA	NA	NA	0
S121	[c]: H2O + ATP + L-methionine --> Phosphate + Diphosphate + S-adenosyl-L-methionine	MAT	2.5.1.6	Amino acid metabolism	I	MMSYN1_0432	56	56	0.93	NA	0.0305184	NA	0
S122	[c]: H2O + S-adenosyl-L-homocysteine --> L-homocysteine + adenosine	AHCi	3.3.1.1	Amino acid metabolism	I	MMSYN1_0381	15	15	0.79	6666	0.00694398	-58.5931	0
S123	[c]: L-glutamine + H2O + L-glutamyl-tRNA(Gln) + ATP --> L-glutaminyl-tRNA(Gln) + ADP + L-glutamate + Phosphate + H+	GLNTRAT	6.3.5.7	Amino acid metabolism	I	MMSYN1_0687 AND MMSYN1_0688 AND MMSYN1_0689	min(212,144,87)	87	0.59	0.23	0.0300789	-0.0117257	0
S124	[c]: H2O + L-glutamyl-tRNA(Gln) + L-asparagine + ATP --> L-glutaminyl-tRNA(Gln) + ADP + Phosphate + H+ + L-aspartate	GLNTRAT2	6.3.5.7	Amino acid metabolism	I	MMSYN1_0687 AND MMSYN1_0688 AND MMSYN1_0689	min(212,144,87)	87	0.59	NF	0.0300789	NA	0.0698175
S125	[c]: tRNA(Met) + L-methionine + ATP --> L-methionyl-tRNA(Met) + AMP + Diphosphate	METTRS	6.1.1.10	Amino acid metabolism	I	MMSYN1_0012	248	248	0.49	NA	0.0712095	NA	0.0372447
S126	[c]: tRNA(Ile) + L-isoleucine + ATP --> L-isoleucyl-tRNA(Ile) + AMP + Diphosphate	ILETRS	6.1.1.5	Amino acid metabolism	I	MMSYN1_0519	216	216	0.35	NA	0.0443008	NA	0.167561
S127	[c]: tRNA(Val) + L-valine + ATP --> L-valyl-tRNA(Val) + AMP + Diphosphate	VALTRS	6.1.1.9	Amino acid metabolism	I	MMSYN1_0260	225	225	51	NA	6.72424	NA	0.111698
S128	[c]: tRNA(Leu) + L-leucine + ATP --> AMP + L-leucyl-tRNA(Leu) + Diphosphate	LEUTRS	6.1.1.4	Amino acid metabolism	I	MMSYN1_0634	208	208	1.28	NA	0.156014	NA	0.167602
S129	[c]: tRNA(Cys) + ATP + L-cysteine --> AMP + Diphosphate + L-cysteinyl-tRNA(Cys)	CYSTRS	6.1.1.16	Amino acid metabolism	I	MMSYN1_0837	111	111	4.4	NA	0.286198	NA	0.0093064
S130	[c]: tRNA(Glu) + L-glutamate + ATP --> L-glutamyl-tRNA(Glu) + AMP + Diphosphate	GLUTRS	6.1.1.24	Amino acid metabolism	I	MMSYN1_0126	138	138	0.408	NA	0.0329936	NA	0.125675
S131	[c]: L-glutamate + ATP + tRNA(Gln) --> L-glutamyl-tRNA(Gln) + AMP + Diphosphate	GLUTRS_Gln	6.1.1.24	Amino acid metabolism	I	MMSYN1_0126	138	138	0.408	NA	0.0329936	NA	0.0698175
S132	[c]: L-arginine + tRNA(Arg) + ATP --> AMP + L-arginyl-tRNA(Arg) + Diphosphate	ARGTRS	6.1.1.19	Amino acid metabolism	I	MMSYN1_0535	191	191	21.9	NA	2.45114	NA	0.0558565
S133	[c]: L-tyrosine + tRNA(Tyr) + ATP --> AMP + L-tyrosyl-tRNA(Tyr) + Diphosphate	TYRTRS	6.1.1.1	Amino acid metabolism	I	MMSYN1_0613	98	98	2.12	NA	0.121745	NA	0.0604977
S134	[c]: tRNA(Trp) + L-tryptophan + ATP --> AMP + L-tryptophanyl-tRNA(Trp) + Diphosphate	TRPTRS	6.1.1.2	Amino acid metabolism	I	MMSYN1_0308	27	27	22	NA	0.348078	NA	0.0139596
S135	[c]: tRNA(Ser) + L-serine + ATP --> L-seryl-tRNA(Ser) + AMP + Diphosphate	SERTRS	6.1.1.11	Amino acid metabolism	I	MMSYN1_0061	246	246	0.057	NA	0.00821675	NA	0.107062
S136	[c]: L-threonine + tRNA(Thr) + ATP --> AMP + L-threonyl-tRNA(Thr) + Diphosphate	THRTRS	6.1.1.3	Amino acid metabolism	I	MMSYN1_0222	303	303	0.037	NA	0.00656953	NA	0.102386
S137	[c]: tRNA(Pro) + ATP + L-proline --> L-prolyl-tRNA(Pro) + AMP + Diphosphate	PROTRS	6.1.1.15	Amino acid metabolism	I	MMSYN1_0282	218	218	60	NA	7.66475	NA	0.0511817
S138	[c]: tRNA(Asp) + L-aspartate + ATP --> AMP + L-aspartyl-tRNA(Asp) + Diphosphate	ASPTRS	6.1.1.12	Amino acid metabolism	I	MMSYN1_0287	188	188	0.042	NA	0.00462698	NA	0.107076
S139	[c]: tRNA(Asn) + L-asparagine + ATP --> AMP + L-asparaginyl-tRNA(Asn) + Diphosphate	ASNTRS	6.1.1.22	Amino acid metabolism	I	MMSYN1_0076	736	736	1.6	NA	0.690062	NA	0.125658
S140	[c]: tRNA(Lys) + L-lysine + ATP --> AMP + Diphosphate + L-lysyl-tRNA(Lys)	LYSTRS	6.1.1.6	Amino acid metabolism	I	MMSYN1_0064	214	214	41.7	NA	5.22926	NA	0.181517
S141	[c]: L-histidine + ATP + tRNA(His) --> AMP + L-histidyl-tRNA(His) + Diphosphate	HISTRS	6.1.1.21	Amino acid metabolism	I	MMSYN1_0288	252	252	4	NA	0.590678	NA	0.0232646
S142	[c]: tRNA(Phe) + L-phenylalanine + ATP --> AMP + L-phenylalanyl-tRNA(Phe) + Diphosphate	PHETRS	6.1.1.20	Amino acid metabolism	I	MMSYN1_0528 AND MMSYN1_0529	min(778,290)	290	1.12	NA	0.19033	NA	0.074457
S143	[c]: L-alanine + tRNA(Ala) + ATP --> L-alanyl-tRNA(Ala) + AMP + Diphosphate	ALATRS	6.1.1.7	Amino acid metabolism	I	MMSYN1_0163	431	431	84	NA	21.2152	NA	0.107031
S144	[c]: glycine + tRNA(Gly) + ATP --> glycyl-tRNA(Gly) + AMP + Diphosphate	GLYTRS	6.1.1.14	Amino acid metabolism	I	MMSYN1_0405	104	104	0.491	NA	0.029923	NA	0.0977325
S145	[c]: nicotinate + 5-phospho-alpha-D-ribose 1-diphosphate + H+ --> nicotinate D-ribonucleotide + Diphosphate	NCTPPRT	2.4.2.12	Cofactor metabolism	I	MMSYN1_0614	165	165	0.00137	NA	0.000132463	NA	3.6e-05
S146	[c]: nicotinate D-ribonucleotide + H+ + ATP --> deamino-NAD+ + Diphosphate	NNATr	2.7.7.18	Cofactor metabolism	I	MMSYN1_0380	65	65	5.5	NA	0.209491	NA	3.6e-05
S147	[c]: deamino-NAD+ + NH3 + ATP --> AMP + NAD+ + Diphosphate	NADS	6.3.1.5	Cofactor metabolism	I	MMSYN1_0378	251	251	0.25	NA	0.0367709	NA	3.6e-05
S148	[c]: NAD+ + ATP --> ADP + NADP+ + H+	NADK	2.7.1.23	Cofactor metabolism	I	MMSYN1_0259	NF	NF	13.78	2.3	NA	NA	3.6e-05
S149	[c]: NADH + ATP --> ADP + H+ + NADPH	NADHK	2.7.1.23	Cofactor metabolism	I	MMSYN1_0259	NF	NF	13.78	2.3	NA	NA	0
S150	[c]: riboflavin + ATP --> ADP + FMN + H+	RBFK	2.7.1.26	Cofactor metabolism	I	MMSYN1_0291	68	68	0.7	NA	0.0278931	NA	7.19e-05
S151	[c]: FMN + H+ + ATP --> Diphosphate + FAD	FMNAT	2.7.7.2	Cofactor metabolism	I	MMSYN1_0291	68	68	0.0917	7.5e-05	0.003654	-2.98855e-06	7.19e-05
S152	[c]: 5-formyltetrahydrofolate + (2) L-glutamate + (2) ATP --> 5-formyltetrahydrofolate tri-L-glutamate + (2) ADP + (2) Phosphate + (2) H+	5FTHFPGS	6.3.2.17	Cofactor metabolism	I	MMSYN1_0823	35	35	1.7	NA	0.0348664	NA	7.19e-05
S153	[c]: H2O + 5,10-methenyltetrahydrofolate tri-L-glutamate <==> 10-formyltetrahydrofolate tri-L-glutamate + H+	MTHFC	3.5.4.9	Cofactor metabolism	R	MMSYN1_0684	76	76	134	NA	5.96772	NA	0.0046604
S154	[c]: L-methionyl-tRNA(Met) + 10-formyltetrahydrofolate tri-L-glutamate --> tetrahydrofolate tri-L-glutamate + N-formylmethionyl-tRNA(Met) + H+	FMETTRS	2.1.2.9	Cofactor metabolism	I	MMSYN1_0390	128	128	37.3	NA	2.79775	NA	0.0046604
S155	[c]: tetrahydrofolate tri-L-glutamate + L-serine <==> glycine + H2O + 5,10-methylenetetrahydrofolate tri-L-glutamate	GHMT	2.1.2.1	Cofactor metabolism	R	MMSYN1_0799	178	178	5	5	0.521531	-0.521531	0.0046604
S156	[c]: NADP+ + 5,10-methylenetetrahydrofolate tri-L-glutamate <==> 5,10-methenyltetrahydrofolate tri-L-glutamate + NADPH	MTHFD	1.5.1.5	Cofactor metabolism	R	MMSYN1_0684	76	76	113	NA	5.03248	NA	0.0046604
S157	[c]: ATP + 5-formyltetrahydrofolate tri-L-glutamate --> ADP + Phosphate + 5,10-methenyltetrahydrofolate tri-L-glutamate	FTHFCL	6.3.3.2	Cofactor metabolism	I	MMSYN1_0443	38	38	0.89	NA	0.0198182	NA	0.0100719
S158	[c]: H2O + 5,10-methenyltetrahydrofolate tri-L-glutamate --> 5-formyltetrahydrofolate tri-L-glutamate + H+	GHMT2	-	Cofactor metabolism	I	MMSYN1_0799	178	178	NA	NA	NA	NA	0.01
S159	[c]: (24) L-valyl-tRNA(Val) + (23) L-aspartyl-tRNA(Asp) + (12) L-arginyl-tRNA(Arg) + N-formylmethionyl-tRNA(Met) + (896) ATP + (39) L-lysyl-tRNA(Lys) + (15) L-glutaminyl-tRNA(Gln) + (36) L-isoleucyl-tRNA(Ile) + (899) H2O + (23) L-seryl-tRNA(Ser) + (11) L-prolyl-tRNA(Pro) + (21) glycyl-tRNA(Gly) + (23) L-alanyl-tRNA(Ala) + (13) L-tyrosyl-tRNA(Tyr) + (22) L-threonyl-tRNA(Thr) + (27) L-asparaginyl-t…	Protein_transl	3.5.1.88/3.4.11.18	Macromolecules	I	MMSYN1_0201 AND MMSYN1_0650	min(156,69)	69	22.5	NA		NA	0.0046529
S160	[c]: L-tyrosyl-tRNA(Tyr) + (4) L-valyl-tRNA(Val) + (8) L-aspartyl-tRNA(Asp) + (3) L-arginyl-tRNA(Arg) + N-formylmethionyl-tRNA(Met) + (169) ATP + (7) L-lysyl-tRNA(Lys) + (3) L-glutaminyl-tRNA(Gln) + (7) L-isoleucyl-tRNA(Ile) + (172) H2O + (6) L-seryl-tRNA(Ser) + (3) glycyl-tRNA(Gly) + (2) L-alanyl-tRNA(Ala) + (3) L-threonyl-tRNA(Thr) + (3) L-asparaginyl-tRNA(Asn) + (2) L-methionyl-tRNA(Met) + (6)…	ACP_transl	3.5.1.88/3.4.11.18	Macromolecules	I	MMSYN1_0201 AND MMSYN1_0621 AND MMSYN1_0650	min(156,138,69)	69	22.5	NA	0.909749	NA	7.2e-06
S161	[c]: (43) L-valyl-tRNA(Val) + (22) L-aspartyl-tRNA(Asp) + (11) L-arginyl-tRNA(Arg) + N-formylmethionyl-tRNA(Met) + (1023) ATP + (35) L-lysyl-tRNA(Lys) + (12) L-glutaminyl-tRNA(Gln) + (36) L-isoleucyl-tRNA(Ile) + (1025) H2O + (30) L-seryl-tRNA(Ser) + (27) L-prolyl-tRNA(Pro) + (27) glycyl-tRNA(Gly) + (50) L-alanyl-tRNA(Ala) + (6) L-tyrosyl-tRNA(Tyr) + (32) L-threonyl-tRNA(Thr) + (20) L-asparaginyl-…	PdhC_transl	3.5.1.88	Macromolecules	I	MMSYN1_0201 AND MMSYN1_0227	min(156,182)	156	0.17	NA	0.0155405	NA	0
S162	[c]: (2) L-valyl-tRNA(Val) + (9) L-aspartyl-tRNA(Asp) + (2) L-arginyl-tRNA(Arg) + N-formylmethionyl-tRNA(Met) + (387) ATP + (15) L-lysyl-tRNA(Lys) + (9) L-glutaminyl-tRNA(Gln) + (22) L-isoleucyl-tRNA(Ile) + (389) H2O + (9) L-seryl-tRNA(Ser) + L-prolyl-tRNA(Pro) + (3) glycyl-tRNA(Gly) + (4) L-alanyl-tRNA(Ala) + (10) L-tyrosyl-tRNA(Tyr) + (5) L-threonyl-tRNA(Thr) + (28) L-asparaginyl-tRNA(Asn) + L-…	dUTPase_transl	3.5.1.88	Macromolecules	I	MMSYN1_0201 AND MMSYN1_0447	min(156,10)	10	0.17	NA	0.000996183	NA	3e-07
S163	[c]: (609) H2O + protein + (225) ATP --> (23) L-alanine + (13) L-tyrosine + (21) glycine + (3) L-tryptophan + (23) L-serine + (27) L-asparagine + (27) L-glutamate + (36) L-leucine + (225) H+ + (11) L-proline + (2) L-cysteine + (12) L-arginine + (39) L-lysine + (22) L-threonine + (16) L-phenylalanine + (225) Phosphate + (23) L-aspartate + (7) L-methionine + (225) ADP + (15) L-glutamine + (36) L-is…	Protein_degrad	3.4.21.53	Macromolecules	I	MMSYN1_0394	757	757	0.26	NA	0.115335	NA	0.00035
S164	[c]: (25) GTP + (28) UTP + (41) H2O + (20) CTP + (68) ATP --> (41) ADP + RNA + (41) Phosphate + (41) H+ + (100) Diphosphate	RNAP	2.7.7.6	Macromolecules	I		NA	NA	NF	NA	NA	NA	0.0094253
S165	[c]: (100) H2O + RNA --> (25) GMP + (27) AMP + (20) CMP + (28) UMP + (100) H+	RNA_degrad	-	Macromolecules	I		NA	NA	NA	NA	NA	NA	0.0077
S166	[c]: (12) dGTP + (137) H2O + (38) dTTP + (12) dCTP + (137) ATP + (38) dATP --> (137) ADP + DNA + (137) Phosphate + (137) H+ + (100) Diphosphate	DNAP	2.7.7.7	Macromolecules	I		NA	NA	2.5	NA	NA	NA	0.0006081
S167	[c]: (0.012567) protein + (0.001776) DNA + (0.000001) dUTPase + (0.001213) L-Histidine + (0.000210) 5,10-methenyltetrahydrofolate tri-L-glutamate + (0.005039) RNA + (0.022954) 1,2-diacylglycerol + (0.020970) cardiolipin + (0.840160) Potassium + (0.000068) DTTP + (0.006481) triacylglycerol + (0.002484) L-Arginine + (0.000105) NADP+ + (0.004288) lipogalactan + (0.000415) L-Tryptophan + (0.004658) C…	BIOMASS	-	Biomass production	I		NA	NA	NA	NA	NA	NA	0.342393
S169	(4) H+[e] + ADP[c] + Phosphate[c] <==> H2O[c] + (3) H+[c] + ATP[c]	ATPase	3.6.3.14	Transport	R	MMSYN1_0789 AND MMSYN1_0790 AND MMSYN1_0791 AND MMSYN1_0792 AND MMSYN1_0793 AND MMSYN1_0794 AND MMSYN1_0795 AND MMSYN1_0796	min(108,347,136,327,32,181,NF,8)	8	16.492	390	0.0773132	-1.82829	-0.575
S170	D-glucose[e] + phosphoenolpyruvate[c] --> D-glucose 6-phosphate[c] + pyruvate[c]	GLCpts	2.7.3.9/2.7.1.199	Transport	I	MMSYN1_0233 AND MMSYN1_0694 AND MMSYN1_0234 AND MMSYN1_0779	min(353,290,314,831)	290	NF	NF	NA	NA	7.4
S171	D-glucosamine[e] + phosphoenolpyruvate[c] --> D-glucosamine 6-phosphate[c] + pyruvate[c]	GAMpts	2.7.3.9/2.7.1.191	Transport	I	MMSYN1_0233 AND MMSYN1_0694 AND MMSYN1_0234 AND MMSYN1_0779	min(353,290,314,831)	290	NF	NF	NA	NA	0
S172	D-mannose[e] + phosphoenolpyruvate[c] --> D-mannose 6-phosphate[c] + pyruvate[c]	MANpts	2.7.3.9/2.7.1.191	Transport	I	MMSYN1_0233 AND MMSYN1_0694 AND MMSYN1_0234 AND MMSYN1_0779	min(353,290,314,831)	290	NF	NF	NA	NA	0
S173	N-acetyl-D-mannosamine[e] + H2O[c] + ATP[c] --> N-acetyl-D-mannosamine[c] + ADP[c] + Phosphate[c] + H+[c]	AMANabc	3.6.3.17	Transport	I		NA	NA	NA	NA	NA	NA	0
S174	L-lactate[c] + H+[c] <==> L-lactate[e] + H+[e]	L_LACt2r	-	Transport	R		NA	NA	NA	NA	NA	NA	7.48979
S175	pyruvate[c] + H+[c] <==> pyruvate[e] + H+[e]	PYRt2r	-	Transport	R		NA	NA	NA	NA	NA	NA	0
S176	H+[c] + acetate[c] <==> H+[e] + acetate[e]	ACt	-	Transport	R		NA	NA	NA	NA	NA	NA	6.9
S177	glycerol[e] <==> glycerol[c]	GLYCt	-	Transport	R		NA	NA	NA	NA	NA	NA	0.063743
S178	fatty acid[e] <==> fatty acid[c]	FAt	-	Transport	R		NA	NA	NA	NA	NA	NA	0.0931696
S179	cholesterol[e] <==> cholesterol[c]	CHOLt	-	Transport	R		NA	NA	NA	NA	NA	NA	0.0135807
S180	triacylglycerol[e] <==> triacylglycerol[c]	TAGt	-	Transport	R		NA	NA	NA	NA	NA	NA	0.002219
S181	acetaldehyde[c] <==> acetaldehyde[e]	ACALDt	-	Transport	R		NA	NA	NA	NA	NA	NA	0
S182	formate[e] <==> formate[c]	FORt	-	Transport	R		NA	NA	NA	NA	NA	NA	-0.0046604
S183	riboflavin[e] + H2O[c] + ATP[c] --> riboflavin[c] + ADP[c] + Phosphate[c] + H+[c]	RIBFLVabc	-	Transport	I	MMSYN1_0641 AND MMSYN1_0642 AND MMSYN1_0643 AND MMSYN1_0877	min(25,274,NF,9)	9	NA	NA	NA	NA	7.19e-05
S184	pyridoxal phosphate[e] + H2O[c] + ATP[c] --> pyridoxal phosphate[c] + ADP[c] + Phosphate[c] + H+[c]	P5Pabc	-	Transport	I	MMSYN1_0641 AND MMSYN1_0642 AND MMSYN1_0643 AND MMSYN1_0345	min(25,274,NF,10)	10	NA	NA	NA	NA	7.19e-05
S185	5-formyltetrahydrofolate[e] + H2O[c] + ATP[c] --> 5-formyltetrahydrofolate[c] + ADP[c] + Phosphate[c] + H+[c]	5FTHFabc	-	Transport	I	MMSYN1_0641 AND MMSYN1_0642 AND MMSYN1_0643 AND MMSYN1_0822	min(25,274,NF,0)	0	NA	NA	NA	NA	7.19e-05
S186	nicotinate[e] + H2O[c] + ATP[c] --> nicotinate[c] + ADP[c] + Phosphate[c] + H+[c]	NACabc	-	Transport	I	MMSYN1_0641 AND MMSYN1_0642 AND MMSYN1_0643 AND MMSYN1_0314	min(25,274,NF,150)	25	NA	NA	NA	NA	3.6e-05
S187	CoA[e] + H2O[c] + ATP[c] --> CoA[c] + ADP[c] + Phosphate[c] + H+[c]	COAabc	-	Transport	I	MMSYN1_0641 AND MMSYN1_0642 AND MMSYN1_0643 AND MMSYN1_0836	min(25,274,NF,1)	1	NA	NA	NA	NA	6.13e-05
S188	thiamin diphosphate[e] + H2O[c] + ATP[c] --> ADP[c] + Phosphate[c] + H+[c] + thiamin diphosphate[c]	THMPPabc	-	Transport	I	MMSYN1_0706 AND MMSYN1_0707 AND MMSYN1_0708	min(2,41,210)	2	NA	NA	NA	NA	7.19e-05
S189	spermine[e] + H2O[c] + ATP[c] --> ADP[c] + Phosphate[c] + H+[c] + spermine[c]	SPRMabc	3.6.3.31	Transport	I	MMSYN1_0195 AND MMSYN1_0196 AND MMSYN1_0197	min(182,19,208)	20	NF	NF	NA	NA	0.0021721
S190	lipoyllysine[e] + PdhC[c] + H2O[c] + ATP[c] --> lipoyl-PdhC[c] + L-lysine[c] + ADP[c] + Phosphate[c] + H+[c]	LIPTA	-	Transport	I	MMSYN1_0401	NF	NF	NA	NA	NA	NA	0
S191	cytidine[e] + H2O[c] + ATP[c] --> cytidine[c] + ADP[c] + Phosphate[c] + H+[c]	CYTDabc	-	Transport	I	MMSYN1_0008 AND MMSYN1_0009 AND MMSYN1_0010 AND MMSYN1_0011	min(5,175,145,81)	5	NA	NA	NA	NA	0
S192	deoxycytidine[e] + H2O[c] + ATP[c] --> deoxycytidine[c] + ADP[c] + Phosphate[c] + H+[c]	DCYTabc	-	Transport	I	MMSYN1_0008 AND MMSYN1_0009 AND MMSYN1_0010 AND MMSYN1_0011	min(5,175,145,81)	5	NA	NA	NA	NA	0.0073101
S193	uridine[e] + H2O[c] + ATP[c] --> uridine[c] + ADP[c] + Phosphate[c] + H+[c]	URIabc	-	Transport	I	MMSYN1_0008 AND MMSYN1_0009 AND MMSYN1_0010 AND MMSYN1_0011	min(5,175,145,81)	5	NA	NA	NA	NA	0
S194	deoxyuridine[e] + H2O[c] + ATP[c] --> deoxyuridine[c] + ADP[c] + Phosphate[c] + H+[c]	DURIabc	-	Transport	I	MMSYN1_0008 AND MMSYN1_0009 AND MMSYN1_0010 AND MMSYN1_0011	min(5,175,145,81)	5	NA	NA	NA	NA	0
S195	thymidine[e] + H2O[c] + ATP[c] --> thymidine[c] + ADP[c] + Phosphate[c] + H+[c]	THMDabc	-	Transport	I	MMSYN1_0008 AND MMSYN1_0009 AND MMSYN1_0010 AND MMSYN1_0011	min(5,175,145,81)	5	NA	NA	NA	NA	0.0231307
S196	adenosine[e] + H2O[c] + ATP[c] --> adenosine[c] + ADP[c] + Phosphate[c] + H+[c]	ADNabc	-	Transport	I	MMSYN1_0008 AND MMSYN1_0009 AND MMSYN1_0010 AND MMSYN1_0011	min(5,175,145,81)	5	NA	NA	NA	NA	0.0524694
S197	deoxyadenosine[e] + H2O[c] + ATP[c] --> deoxyadenosine[c] + ADP[c] + Phosphate[c] + H+[c]	DADNabc	-	Transport	I	MMSYN1_0008 AND MMSYN1_0009 AND MMSYN1_0010 AND MMSYN1_0011	min(5,175,145,81)	5	NA	NA	NA	NA	0.0184666
S198	guanosine[e] + H2O[c] + ATP[c] --> guanosine[c] + ADP[c] + Phosphate[c] + H+[c]	GSNabc	-	Transport	I	MMSYN1_0008 AND MMSYN1_0009 AND MMSYN1_0010 AND MMSYN1_0011	min(5,175,145,81)	5	NA	NA	NA	NA	0.0438828
S199	deoxyguanosine[e] + H2O[c] + ATP[c] --> deoxyguanosine[c] + ADP[c] + Phosphate[c] + H+[c]	DGSNabc	-	Transport	I	MMSYN1_0008 AND MMSYN1_0009 AND MMSYN1_0010 AND MMSYN1_0011	min(5,175,145,81)	5	NA	NA	NA	NA	0.0073046
S200	uracil[e] + H+[e] --> uracil[c] + H+[c]	URAt2	-	Transport	I		NA	NA	NA	NA	NA	NA	0.0839401
S201	guanine[e] + H+[e] --> guanine[c] + H+[c]	GUAt2	-	Transport	I		NA	NA	NA	NA	NA	NA	0
S202	adenine[e] + H+[e] --> adenine[c] + H+[c]	ADEt2	-	Transport	I		NA	NA	NA	NA	NA	NA	0
S203	Sodium[e] --> Sodium[c]	NAt	-	Transport	I		NA	NA	NA	NA	NA	NA	0.307234
S204	Potassium[e] + Sodium[c] + H2O[c] + ATP[c] --> Potassium[c] + Sodium[e] + ADP[c] + Phosphate[c] + H+[c]	Kt6	3.6.3.9	Transport	I	MMSYN1_0685 AND MMSYN1_0686	min(17,305)	17	NA	NA	NA	NA	0.287665
S205	Sodium[c] + H+[e] --> Sodium[e] + H+[c]	NAt3	-	Transport	I		NA	NA	NA	NA	NA	NA	0
S206	Magnesium[e] + H2O[c] + ATP[c] --> Magnesium[c] + ADP[c] + Phosphate[c] + H+[c]	MG2abc	3.6.3.2	Transport	I	MMSYN1_0787	65	65	NF	NF	NA	NA	0.002658
S207	Calcium[e] + H2O[c] + ATP[c] --> Calcium[c] + ADP[c] + Phosphate[c] + H+[c]	CA2abc	3.6.3.8	Transport	I	MMSYN1_0879	80	80	21.35	NA	1.00087	NA	0.0015949
S208	Chloride[e] <==> Chloride[c]	CLt	-	Transport	R		NA	NA	NA	NA	NA	NA	0.0191237
S209	H+[e] --> H+[c]	Ht	-	Transport	I		NA	NA	NA	NA	NA	NA	0.654673
S210	Phosphate[e] + H2O[c] + ATP[c] --> ADP[c] + (2) Phosphate[c] + H+[c]	PIabc	3.6.3.27	Transport	I	MMSYN1_0425 AND MMSYN1_0426 AND MMSYN1_0427	min(56,26,123)	26	NF	NA	NA	NA	0.283981
S211	Tetra-L-arginine[e] + ATP[c] + H2O[c] --> Tetra-L-arginine[c] + ADP[c] + Phosphate[c] + H+[c]	ARG4abc	3.6.3.23	Transport	I	MMSYN1_0165 AND MMSYN1_0166 AND MMSYN1_0167 AND MMSYN1_0168 AND MMSYN1_0169	min(59,64,242,241,314)	59	NF	NA	NA	NA	0
S212	Tetra-L-aspartate[e] + ATP[c] + H2O[c] --> Tetra-L-aspartate[c] + ADP[c] + Phosphate[c] + H+[c]	ASP4abc	3.6.3.23	Transport	I	MMSYN1_0165 AND MMSYN1_0166 AND MMSYN1_0167 AND MMSYN1_0168 AND MMSYN1_0169	min(59,64,242,241,314)	59	NF	NA	NA	NA	0
S213	Tetra-L-glutamate[e] + ATP[c] + H2O[c] --> Tetra-L-glutamate[c] + ADP[c] + Phosphate[c] + H+[c]	GLU4abc	3.6.3.23	Transport	I	MMSYN1_0165 AND MMSYN1_0166 AND MMSYN1_0167 AND MMSYN1_0168 AND MMSYN1_0169	min(59,64,242,241,314)	59	NF	NA	NA	NA	0
S214	Tetra-glycine[e] + ATP[c] + H2O[c] --> Tetra-glycine[c] + ADP[c] + Phosphate[c] + H+[c]	GLY4abc	3.6.3.23	Transport	I	MMSYN1_0165 AND MMSYN1_0166 AND MMSYN1_0167 AND MMSYN1_0168 AND MMSYN1_0169	min(59,64,242,241,314)	59	NF	NA	NA	NA	0
S215	Tetra-L-isoleucine[e] + ATP[c] + H2O[c] --> Tetra-L-isoleucine[c] + ADP[c] + Phosphate[c] + H+[c]	ISO4abc	3.6.3.23	Transport	I	MMSYN1_0165 AND MMSYN1_0166 AND MMSYN1_0167 AND MMSYN1_0168 AND MMSYN1_0169	min(59,64,242,241,314)	59	NF	NA	NA	NA	0
S216	Tetra-L-alanine[e] + ATP[c] + H2O[c] --> Tetra-L-alanine[c] + ADP[c] + Phosphate[c] + H+[c]	ALA4abc	3.6.3.23	Transport	I	MMSYN1_0165 AND MMSYN1_0166 AND MMSYN1_0167 AND MMSYN1_0168 AND MMSYN1_0169	min(59,64,242,241,314)	59	NF	NA	NA	NA	0
S217	Tetra-L-asparagine[e] + ATP[c] + H2O[c] --> Tetra-L-asparagine[c] + ADP[c] + Phosphate[c] + H+[c]	ASN4abc	3.6.3.23	Transport	I	MMSYN1_0165 AND MMSYN1_0166 AND MMSYN1_0167 AND MMSYN1_0168 AND MMSYN1_0169	min(59,64,242,241,314)	59	NF	NA	NA	NA	0
S218	Tetra-L-leucine[e] + ATP[c] + H2O[c] --> Tetra-L-leucine[c] + ADP[c] + Phosphate[c] + H+[c]	LEU4abc	3.6.3.23	Transport	I	MMSYN1_0165 AND MMSYN1_0166 AND MMSYN1_0167 AND MMSYN1_0168 AND MMSYN1_0169	min(59,64,242,241,314)	59	NF	NA	NA	NA	0
S219	Tetra-L-glutamine[e] + ATP[c] + H2O[c] --> Tetra-L-glutamine[c] + ADP[c] + Phosphate[c] + H+[c]	GLN4abc	3.6.3.23	Transport	I	MMSYN1_0165 AND MMSYN1_0166 AND MMSYN1_0167 AND MMSYN1_0168 AND MMSYN1_0169	min(59,64,242,241,314)	59	NF	NA	NA	NA	0
S220	Tetra-L-histidine[e] + ATP[c] + H2O[c] --> Tetra-L-histidine[c] + ADP[c] + Phosphate[c] + H+[c]	HIS4abc	3.6.3.23	Transport	I	MMSYN1_0165 AND MMSYN1_0166 AND MMSYN1_0167 AND MMSYN1_0168 AND MMSYN1_0169	min(59,64,242,241,314)	59	NF	NA	NA	NA	0
S221	Tetra-L-lysine[e] + ATP[c] + H2O[c] --> Tetra-L-lysine[c] + ADP[c] + Phosphate[c] + H+[c]	LYS4abc	3.6.3.23	Transport	I	MMSYN1_0165 AND MMSYN1_0166 AND MMSYN1_0167 AND MMSYN1_0168 AND MMSYN1_0169	min(59,64,242,241,314)	59	NF	NA	NA	NA	0
S222	Tetra-L-proline[e] + ATP[c] + H2O[c] --> Tetra-L-proline[c] + ADP[c] + Phosphate[c] + H+[c]	PRO4abc	3.6.3.23	Transport	I	MMSYN1_0165 AND MMSYN1_0166 AND MMSYN1_0167 AND MMSYN1_0168 AND MMSYN1_0169	min(59,64,242,241,314)	59	NF	NA	NA	NA	0
S223	Tetra-L-phenylalanine[e] + ATP[c] + H2O[c] --> Tetra-L-phenylalanine[c] + ADP[c] + Phosphate[c] + H+[c]	PHE4abc	3.6.3.23	Transport	I	MMSYN1_0165 AND MMSYN1_0166 AND MMSYN1_0167 AND MMSYN1_0168 AND MMSYN1_0169	min(59,64,242,241,314)	59	NF	NA	NA	NA	0
S224	Tetra-L-threonine[e] + ATP[c] + H2O[c] --> Tetra-L-threonine[c] + ADP[c] + Phosphate[c] + H+[c]	THR4abc	3.6.3.23	Transport	I	MMSYN1_0165 AND MMSYN1_0166 AND MMSYN1_0167 AND MMSYN1_0168 AND MMSYN1_0169	min(59,64,242,241,314)	59	NF	NA	NA	NA	0
S225	Tetra-L-tryptophan[e] + ATP[c] + H2O[c] --> Tetra-L-tryptophan[c] + ADP[c] + Phosphate[c] + H+[c]	TRP4abc	3.6.3.23	Transport	I	MMSYN1_0165 AND MMSYN1_0166 AND MMSYN1_0167 AND MMSYN1_0168 AND MMSYN1_0169	min(59,64,242,241,314)	59	NF	NA	NA	NA	0
S226	Tetra-L-tyrosine[e] + ATP[c] + H2O[c] --> Tetra-L-tyrosine[c] + ADP[c] + Phosphate[c] + H+[c]	TYR4abc	3.6.3.23	Transport	I	MMSYN1_0165 AND MMSYN1_0166 AND MMSYN1_0167 AND MMSYN1_0168 AND MMSYN1_0169	min(59,64,242,241,314)	59	NF	NA	NA	NA	0
S227	Tetra-L-valine[e] + ATP[c] + H2O[c] --> Tetra-L-valine[c] + ADP[c] + Phosphate[c] + H+[c]	VAL4abc	3.6.3.23	Transport	I	MMSYN1_0165 AND MMSYN1_0166 AND MMSYN1_0167 AND MMSYN1_0168 AND MMSYN1_0169	min(59,64,242,241,314)	59	NF	NA	NA	NA	0
S228	Tetra-L-serine[e] + ATP[c] + H2O[c] --> Tetra-L-serine[c] + ADP[c] + Phosphate[c] + H+[c]	SER4abc	3.6.3.23	Transport	I	MMSYN1_0165 AND MMSYN1_0166 AND MMSYN1_0167 AND MMSYN1_0168 AND MMSYN1_0169	min(59,64,242,241,314)	59	NF	NA	NA	NA	0
S229	Tetra-L-methionine[e] + ATP[c] + H2O[c] --> Tetra-L-methionine[c] + ADP[c] + Phosphate[c] + H+[c]	MET4abc	3.6.3.23	Transport	I	MMSYN1_0165 AND MMSYN1_0166 AND MMSYN1_0167 AND MMSYN1_0168 AND MMSYN1_0169	min(59,64,242,241,314)	59	NF	NA	NA	NA	0
S230	L-arginine[e] + H+[e] --> L-arginine[c] + H+[c]	ARGt2r	-	Transport	I	MMSYN1_0876 OR MMSYN1_0878	sum(46,8)	54	NA	NA	NA	NA	0.052507
S231	L-aspartate[e] + (2) H+[e] --> L-aspartate[c] + (2) H+[c]	ASPt2pr	-	Transport	I	MMSYN1_0886	44	44	NA	NA	NA	NA	0.0310721
S232	L-cysteine[e] + H+[e] --> L-cysteine[c] + H+[c]	CYSt2r	-	Transport	I	MMSYN1_0876 OR MMSYN1_0878	sum(46,8)	54	NA	NA	NA	NA	0.008819
S233	L-glutamate[e] + (2) H+[e] --> L-glutamate[c] + (2) H+[c]	GLUt2pr	-	Transport	I	MMSYN1_0886	44	44	NA	NA	NA	NA	0.153275
S234	glycine[e] + H+[e] --> glycine[c] + H+[c]	GLYt2r	-	Transport	I	MMSYN1_0876 OR MMSYN1_0878	sum(46,8)	54	NA	NA	NA	NA	0.0888112
S235	L-isoleucine[e] + H+[e] --> L-isoleucine[c] + H+[c]	ISOt2r	-	Transport	I	MMSYN1_0876 OR MMSYN1_0878	sum(46,8)	54	NA	NA	NA	NA	0.157956
S236	L-alanine[e] + H+[e] --> L-alanine[c] + H+[c]	ALAt2r	-	Transport	I	MMSYN1_0876 OR MMSYN1_0878	sum(46,8)	54	NA	NA	NA	NA	0.101946
S237	L-asparagine[e] + H+[e] --> L-asparagine[c] + H+[c]	ASNt2r	-	Transport	I	MMSYN1_0876 OR MMSYN1_0878	sum(46,8)	54	NA	NA	NA	NA	0.188171
S238	L-leucine[e] + H+[e] --> L-leucine[c] + H+[c]	LEUt2r	-	Transport	I	MMSYN1_0876 OR MMSYN1_0878	sum(46,8)	54	NA	NA	NA	NA	0.157923
S239	L-glutamine[e] + H+[e] --> L-glutamine[c] + H+[c]	GLNt2r	-	Transport	I	MMSYN1_0876 OR MMSYN1_0878	sum(46,8)	54	NA	NA	NA	NA	0.0307554
S240	L-histidine[e] + H+[e] --> L-histidine[c] + H+[c]	HISt2r	-	Transport	I	MMSYN1_0876 OR MMSYN1_0878	sum(46,8)	54	NA	NA	NA	NA	0.0219299
S241	L-lysine[e] + H+[e] --> L-lysine[c] + H+[c]	LYSt2r	-	Transport	I	MMSYN1_0876 OR MMSYN1_0878	sum(46,8)	54	NA	NA	NA	NA	0.170973
S242	L-proline[e] + H+[e] --> L-proline[c] + H+[c]	PROt2r	-	Transport	I	MMSYN1_0876 OR MMSYN1_0878	sum(46,8)	54	NA	NA	NA	NA	0.0483668
S243	L-phenylalanine[e] + H+[e] --> L-phenylalanine[c] + H+[c]	PHEt2r	-	Transport	I	MMSYN1_0876 OR MMSYN1_0878	sum(46,8)	54	NA	NA	NA	NA	0.0698708
S244	L-threonine[e] + H+[e] --> L-threonine[c] + H+[c]	THRt2r	-	Transport	I	MMSYN1_0876 OR MMSYN1_0878	sum(46,8)	54	NA	NA	NA	NA	0.0967411
S245	L-tryptophan[e] + H+[e] --> L-tryptophan[c] + H+[c]	TRPt2r	-	Transport	I	MMSYN1_0876 OR MMSYN1_0878	sum(46,8)	54	NA	NA	NA	NA	0.0130517
S246	L-tyrosine[e] + H+[e] --> L-tyrosine[c] + H+[c]	TYRt2r	-	Transport	I	MMSYN1_0876 OR MMSYN1_0878	sum(46,8)	54	NA	NA	NA	NA	0.0567297
S247	L-valine[e] + H+[e] --> L-valine[c] + H+[c]	VALt2r	-	Transport	I	MMSYN1_0876 OR MMSYN1_0878	sum(46,8)	54	NA	NA	NA	NA	0.105717
S248	L-serine[e] + H+[e] --> L-serine[c] + H+[c]	SERt2r	-	Transport	I	MMSYN1_0876 OR MMSYN1_0878	sum(46,8)	54	NA	NA	NA	NA	0.105971
S249	L-methionine[e] + H+[e] --> L-methionine[c] + H+[c]	METt2r	-	Transport	I	MMSYN1_0876 OR MMSYN1_0878	sum(46,8)	54	NA	NA	NA	NA	0.030739
S250	O2[e] <==> O2[c]	O2t	-	Transport	R			0	NA	NA	NA	NA	6.9
S251	CO2[e] <==> CO2[c]	CO2t	-	Transport	R			0	NA	NA	NA	NA	-6.9
S252	H2O[e] <==> H2O[c]	H2Ot	-	Transport	R			0	NA	NA	NA	NA	-9.39028
S253	NH3[e] <==> NH3[c]	NH3t	-	Transport	R			0	NA	NA	NA	NA	3.6e-05
S254	L-homocysteine[c] --> L-homocysteine[e]	HCYSt	-	Transport	I			0	NA	NA	NA	NA	0
S255	[c]: biomass -->	EX_biomass_c	-	Exchange	I			0	NA	NA	NA	NA	0.342393
S256	[e]: L-lactate <==>	EX_lac__L_e	-	Exchange	R			0	NA	NA	NA	NA	7.48979
S257	[e]: pyruvate <==>	EX_pyr_e	-	Exchange	R			0	NA	NA	NA	NA	0
S258	[e]: acetate <==>	EX_ac_e	-	Exchange	R			0	NA	NA	NA	NA	6.9
S259	[e]: adenine <==>	EX_ade_e	-	Exchange	R			0	NA	NA	NA	NA	0
S260	[e]: CO2 <==>	EX_co2_e	-	Exchange	R			0	NA	NA	NA	NA	6.9
S261	[e]: Tetra-L-arginine[e] <==>	EX_arg4_e	-	Exchange	R			0	NA	NA	NA	NA	0
S262	[e]: Tetra-L-aspartate[e] <==>	EX_asp4_e	-	Exchange	R			0	NA	NA	NA	NA	0
S263	[e]: Tetra-L-glutamate[e] <==>	EX_glu4_e	-	Exchange	R			0	NA	NA	NA	NA	0
S264	[e]: Tetra-glycine[e] <==>	EX_gly4_e	-	Exchange	R			0	NA	NA	NA	NA	0
S265	[e]: Tetra-L-isoleucine[e] <==>	EX_ile4_e	-	Exchange	R			0	NA	NA	NA	NA	0
S266	[e]: Tetra-L-alanine[e] <==>	EX_ala4_e	-	Exchange	R			0	NA	NA	NA	NA	0
S267	[e]: Tetra-L-asparagine[e] <==>	EX_asn4_e	-	Exchange	R			0	NA	NA	NA	NA	0
S268	[e]: Tetra-L-leucine[e] <==>	EX_leu4_e	-	Exchange	R			0	NA	NA	NA	NA	0
S269	[e]: Tetra-L-glutamine[e] <==>	EX_gln4_e	-	Exchange	R			0	NA	NA	NA	NA	0
S270	[e]: Tetra-L-histidine[e] <==>	EX_his4_e	-	Exchange	R			0	NA	NA	NA	NA	0
S271	[e]: Tetra-L-lysine[e] <==>	EX_lys4_e	-	Exchange	R			0	NA	NA	NA	NA	0
S272	[e]: Tetra-L-proline[e] <==>	EX_pro4_e	-	Exchange	R			0	NA	NA	NA	NA	0
S273	[e]: Tetra-L-phenylalanine[e] <==>	EX_phe4_e	-	Exchange	R			0	NA	NA	NA	NA	0
S274	[e]: Tetra-L-threonine[e] <==>	EX_thr4_e	-	Exchange	R			0	NA	NA	NA	NA	0
S275	[e]: Tetra-L-tryptophan[e] <==>	EX_trp4_e	-	Exchange	R			0	NA	NA	NA	NA	0
S276	[e]: Tetra-L-tyrosine[e] <==>	EX_tyr4_e	-	Exchange	R			0	NA	NA	NA	NA	0
S277	[e]: Tetra-L-valine[e] <==>	EX_val4_e	-	Exchange	R			0	NA	NA	NA	NA	0
S278	[e]: Tetra-L-serine[e] <==>	EX_ser4_e	-	Exchange	R			0	NA	NA	NA	NA	0
S279	[e]: Tetra-L-methionine[e] <==>	EX_met4_e	-	Exchange	R			0	NA	NA	NA	NA	0
S280	[e]: glycine <==>	EX_gly_e	-	Exchange	R			0	NA	NA	NA	NA	-0.0888112
S281	[e]: L-alanine <==>	EX_ala__L_e	-	Exchange	R			0	NA	NA	NA	NA	-0.101946
S282	[e]: L-arginine <==>	EX_arg__L_e	-	Exchange	R			0	NA	NA	NA	NA	-0.052507
S283	[e]: L-asparagine <==>	EX_asn__L_e	-	Exchange	R			0	NA	NA	NA	NA	-0.188171
S284	[e]: L-aspartate <==>	EX_asp__L_e	-	Exchange	R			0	NA	NA	NA	NA	-0.0310721
S285	[e]: L-cysteine <==>	EX_cys__L_e	-	Exchange	R			0	NA	NA	NA	NA	-0.008819
S286	[e]: L-glutamate <==>	EX_glu__L_e	-	Exchange	R			0	NA	NA	NA	NA	-0.153275
S287	[e]: L-glutamine <==>	EX_gln__L_e	-	Exchange	R			0	NA	NA	NA	NA	-0.0307554
S288	[e]: L-histidine <==>	EX_his__L_e	-	Exchange	R			0	NA	NA	NA	NA	-0.0219299
S289	[e]: L-homocysteine <==>	EX_hcys__L_e	-	Exchange	R			0	NA	NA	NA	NA	0
S290	[e]: L-isoleucine <==>	EX_ile__L_e	-	Exchange	R			0	NA	NA	NA	NA	-0.157956
S291	[e]: L-leucine <==>	EX_leu__L_e	-	Exchange	R			0	NA	NA	NA	NA	-0.157923
S292	[e]: L-lysine <==>	EX_lys__L_e	-	Exchange	R			0	NA	NA	NA	NA	-0.170973
S293	[e]: L-methionine <==>	EX_met__L_e	-	Exchange	R			0	NA	NA	NA	NA	-0.030739
S294	[e]: L-phenylalanine <==>	EX_phe__L_e	-	Exchange	R			0	NA	NA	NA	NA	-0.0698708
S295	[e]: L-proline <==>	EX_pro__L_e	-	Exchange	R			0	NA	NA	NA	NA	-0.0483668
S296	[e]: L-serine <==>	EX_ser__L_e	-	Exchange	R			0	NA	NA	NA	NA	-0.105971
S297	[e]: L-threonine <==>	EX_thr__L_e	-	Exchange	R			0	NA	NA	NA	NA	-0.0967411
S298	[e]: L-tryptophan <==>	EX_trp__L_e	-	Exchange	R			0	NA	NA	NA	NA	-0.0130517
S299	[e]: L-tyrosine <==>	EX_tyr__L_e	-	Exchange	R			0	NA	NA	NA	NA	-0.0567297
S300	[e]: L-valine <==>	EX_val__L_e	-	Exchange	R			0	NA	NA	NA	NA	-0.105717
S301	[e]: NH3 <==>	EX_nh3_e	-	Exchange	R			0	NA	NA	NA	NA	-3.6e-05
S302	[e]: cytidine <==>	EX_cytd_e	-	Exchange	R			0	NA	NA	NA	NA	0
S303	[e]: deoxycytidine <==>	EX_dcyt_e	-	Exchange	R			0	NA	NA	NA	NA	-0.0073101
S304	[e]: fatty acid <==>	EX_fa_e	-	Exchange	R			0	NA	NA	NA	NA	-0.0931696
S305	[e]: 5-formyltetrahydrofolate <==>	EX_5fthf_e	-	Exchange	R			0	NA	NA	NA	NA	-7.19e-05
S306	[e]: D-glucose <==>	EX_glc__D_e	-	Exchange	R			0	NA	NA	NA	NA	-7.4
S307	[e]: D-glucosamine <==>	EX_gam_e	-	Exchange	R			0	NA	NA	NA	NA	0
S308	[e]: D-mannose <==>	EX_man_e	-	Exchange	R			0	NA	NA	NA	NA	0
S309	[e]: N-acetyl-D-mannosamine <==>	EX_acmana_e	-	Exchange	R			0	NA	NA	NA	NA	0
S310	[e]: glycerol <==>	EX_glyc_e	-	Exchange	R			0	NA	NA	NA	NA	-0.063743
S311	[e]: guanine <==>	EX_gua_e	-	Exchange	R			0	NA	NA	NA	NA	0
S312	[e]: H+ <==>	EX_h_e	-	Exchange	R			0	NA	NA	NA	NA	14.0755
S313	[e]: nicotinate <==>	EX_nac_e	-	Exchange	R			0	NA	NA	NA	NA	-3.6e-05
S314	[e]: Phosphate <==>	EX_pi_e	-	Exchange	R			0	NA	NA	NA	NA	-0.283981
S315	[e]: O2 <==>	EX_o2_e	-	Exchange	R			0	NA	NA	NA	NA	-6.9
S316	[e]: riboflavin <==>	EX_ribflv_e	-	Exchange	R			0	NA	NA	NA	NA	-7.19e-05
S317	[e]: uracil <==>	EX_ura_e	-	Exchange	R			0	NA	NA	NA	NA	-0.0839401
S318	[e]: H2O <==>	EX_h2o_e	-	Exchange	R			0	NA	NA	NA	NA	9.39028
S319	[e]: uridine <==>	EX_uri_e	-	Exchange	R			0	NA	NA	NA	NA	0
S320	[e]: deoxyuridine <==>	EX_duri_e	-	Exchange	R			0	NA	NA	NA	NA	0
S321	[e]: thymidine <==>	EX_thymd_e	-	Exchange	R			0	NA	NA	NA	NA	-0.0231307
S322	[e]: adenosine <==>	EX_adn_e	-	Exchange	R			0	NA	NA	NA	NA	-0.0524694
S323	[e]: deoxyadenosine <==>	EX_dad_2_e	-	Exchange	R			0	NA	NA	NA	NA	-0.0184666
S324	[e]: guanosine <==>	EX_gsn_e	-	Exchange	R			0	NA	NA	NA	NA	-0.0438828
S325	[e]: deoxyguanosine <==>	EX_dgsn_e	-	Exchange	R			0	NA	NA	NA	NA	-0.0073046
S326	[e]: CoA <==>	EX_coa_e	-	Exchange	R			0	NA	NA	NA	NA	-6.13e-05
S327	[e]: pyridoxal phosphate <==>	EX_pydx5p_e	-	Exchange	R			0	NA	NA	NA	NA	-7.19e-05
S328	[e]: thiamin diphosphate <==>	EX_thmpp_e	-	Exchange	R			0	NA	NA	NA	NA	-7.19e-05
S329	[e]: cholesterol <==>	EX_chsterol_e	-	Exchange	R			0	NA	NA	NA	NA	-0.0135807
S330	[e]: triacylglycerol <==>	EX_tag_e	-	Exchange	R			0	NA	NA	NA	NA	-0.002219
S331	[e]: acetaldehyde <==>	EX_acald_e	-	Exchange	R			0	NA	NA	NA	NA	0
S332	[e]: Sodium <==>	EX_na1_e	-	Exchange	R			0	NA	NA	NA	NA	-0.0195688
S333	[e]: Potassium <==>	EX_k_e	-	Exchange	R			0	NA	NA	NA	NA	-0.287665
S334	[e]: Magnesium <==>	EX_mg2_e	-	Exchange	R			0	NA	NA	NA	NA	-0.002658
S335	[e]: Calcium <==>	EX_ca2_e	-	Exchange	R			0	NA	NA	NA	NA	-0.0015949
S336	[e]: Chloride <==>	EX_cl_e	-	Exchange	R			0	NA	NA	NA	NA	-0.0191237
S337	[e]: spermine <==>	EX_sprm_e	-	Exchange	R			0	NA	NA	NA	NA	-0.0021721
S338	[e]: formate <==>	EX_for_e	-	Exchange	R			0	NA	NA	NA	NA	0.0046604
S339	[e]: lipoyllysine <==>	EX_lplys__L_e	-	Exchange	R			0	NA	NA	NA	NA	0

## Sheet: kcat data from script
EC Number	Name	Substrate	Product	kcat (1/s)	Organism	min(kcat) (1/s)	median(kcat) (1/s)	max(kcat) (1/s)	Total kcats	Phylogenetic distance	Mutant	Temperature (°C)	pH	Selection criterion	Note
1.1.1.27	(S)-lactate:NAD+ oxidoreductase	(S)-lactate; NAD+	pyruvate; NADH; H+	32	Geobacillus stearothermophilus	3.3	32	65	15	1.5	No	25	8	Wild-type	25°C, pH 8, wild-type enzyme, activated by fructose 1,6-diphosphate
1.1.1.27	(S)-lactate:NAD+ oxidoreductase	pyruvate; NADH; H+	(S)-lactate; NAD+	643	Lactobacillus helveticus	21.1	195.947	2330	34	1.04976	No			Phylogenetic difference (ddist=0.360)
1.2.1.12	D-glyceraldehyde-3-phosphate:NAD+ oxidoreductase (phosphorylating)	D-glyceraldehyde 3-phosphate; phosphate; NAD+	3-phospho-D-glyceroyl phosphate; NADH; H+	70	Bacillus subtilis	0.002	26.6606	234	34	0.87636	Yes			Wild-type/mutant	wild-type enzyme and mutant enzyme L187N
1.2.1.12	D-glyceraldehyde-3-phosphate:NAD+ oxidoreductase (phosphorylating)	3-phospho-D-glyceroyl phosphate; NADH; H+	D-glyceraldehyde 3-phosphate; phosphate; NAD+	73.56	Oryza sativa	0.06	0.10583	73.6	8	4.05199	No	25	7.6	pH (ddpH=1.2)	wild type enzyme, in 80 mM triethanolamine, 3.3 mM L-cysteine HCl, 1.7 mM MgSO4, 0.5 mM EDTA, pH 7.6, at 25°C
1.2.1.9	D-glyceraldehyde-3-phosphate:NADP+ oxidoreductase	D-glyceraldehyde 3-phosphate; NADP+; H2O	3-phospho-D-glycerate; NADPH; H+	60	Streptococcus mutans	0.06	78.613	341	12	1.01295	No	25	8.5	Wild-type	pH 8.5, 25°C, wild-type enzyme
1.2.4.1	pyruvate:[dihydrolipoyllysine-residue acetyltransferase]-lipoyllysine 2-oxidoreductase (decarboxylating, acceptor-acetylating)	pyruvate; [dihydrolipoyllysine-residue acetyltransferase] lipoyllysine	[dihydrolipoyllysine-residue acetyltransferase] S-acetyldihydrolipoyllysine; CO2	0.05	Pseudomonas putida	0.05	3.34287	486	36	1.42881	No	30	6.7	Phylogenetic difference (ddist=0.080)	pH 6.7, 30°C
1.5.1.5	5,10-methylenetetrahydrofolate:NADP+ oxidoreductase	5,10-methylenetetrahydrofolate; NADP+	5,10-methenyltetrahydrofolate; NADPH; H+	113	Photobacterium phosphoreum	3.2	10	113	8	1.50234	No			Phylogenetic difference (ddist=2.600)
1.8.1.4	protein-N6-(dihydrolipoyl)lysine:NAD+ oxidoreductase	protein N6-(dihydrolipoyl)lysine; NAD+	protein N6-(lipoyl)lysine; NADH; H+	160	Streptococcus pneumoniae	6.75	160	574	7	0.98782	No			Shorter comment	recombinant DLDH
1.8.1.4	protein-N6-(dihydrolipoyl)lysine:NAD+ oxidoreductase	protein N6-(lipoyl)lysine; NADH; H+	protein N6-(dihydrolipoyl)lysine; NAD+	340	Homo sapiens	19.8	94.3822	448	4	4.09671	No			Wild-type	wild-type enzyme
1.8.1.9	thioredoxin:NADP+ oxidoreductase	thioredoxin; NADP+	thioredoxin disulfide; NADPH; H+	22	Escherichia coli	0.016	14.8398	1300	36	1.51244	No			pH (ddpH=0.9)	wild-type
1.8.1.9	thioredoxin:NADP+ oxidoreductase	thioredoxin disulfide; NADPH; H+	thioredoxin; NADP+	94.17	Rattus norvegicus	0.083	10.5527	114.1	18	4.1067	No	20		Wild-type	wild type enzyme, in TE buffer, at 20°C
2.1.2.1	5,10-methylenetetrahydrofolate:glycine hydroxymethyltransferase	5,10-methylenetetrahydrofolate; glycine; H2O	tetrahydrofolate; L-serine	5	Hydrogenobacter thermophilus	5	5	5	1	2.5	No	70	7.5	Only option	pH 7.5, 70°C
2.1.2.1	5,10-methylenetetrahydrofolate:glycine hydroxymethyltransferase	tetrahydrofolate; L-serine	5,10-methylenetetrahydrofolate; glycine; H2O	5	Escherichia coli	0.005	2	640	59	1.51244	No			Shorter comment	Median of 2 entries: [5] wild-type enzyme; [5] wild-type enzyme
2.1.2.9	10-formyltetrahydrofolate:L-methionyl-tRNA N-formyltransferase	10-formyltetrahydrofolate; L-methionyl-tRNAfMet	tetrahydrofolate; N-formylmethionyl-tRNAfMet	37.3	Escherichia coli	0.13	13.9	46.3	21	1.51244	No			Wild-type	Median of 3 entries: [13.9] wild-type enzyme; [37.3] wild-type enzyme; [39.1] wild-type enzyme
2.2.1.1	sedoheptulose-7-phosphate:D-glyceraldehyde-3-phosphate glycolaldehydetransferase	sedoheptulose 7-phosphate; D-glyceraldehyde 3-phosphate	D-ribose 5-phosphate; D-xylulose 5-phosphate	99	Bacillus methanolicus	48	68.9348	99	2	0.89732	No	55	7.5	pH (ddpH=0.2)	isoform TKTc, at pH 7.5 and 55°C
2.2.1.1	sedoheptulose-7-phosphate:D-glyceraldehyde-3-phosphate glycolaldehydetransferase	D-ribose 5-phosphate; D-xylulose 5-phosphate	sedoheptulose 7-phosphate; D-glyceraldehyde 3-phosphate	6.3	Homo sapiens	0.0148	7.27461	56.7	16	4.09671	No	30	7.6	Shorter comment	recombinant enzyme, pH 7.6, 30°C
2.2.1.2	sedoheptulose-7-phosphate:D-glyceraldehyde-3-phosphate glyceronetransferase	sedoheptulose 7-phosphate; D-glyceraldehyde 3-phosphate	D-erythrose 4-phosphate; D-fructose 6-phosphate	13	Escherichia coli	12	12.49	13	2	1.51244	No	30	8.5	Wild-type	wild-type, pH 8.5, 30°C
2.2.1.2	sedoheptulose-7-phosphate:D-glyceraldehyde-3-phosphate glyceronetransferase	D-erythrose 4-phosphate; D-fructose 6-phosphate	sedoheptulose 7-phosphate; D-glyceraldehyde 3-phosphate	0.22	Escherichia coli	0.21	7.4	22.9	7	1.51244	Yes			Shorter comment	mutant F189Y, reaction: fructose 6-phosphate cleavage into dihydroxyacetone and glyceraldehyde 3-phosphate
2.3.1.12	acetyl-CoA:enzyme N6-(dihydrolipoyl)lysine S-acetyltransferase	acetyl-CoA; enzyme N6-(dihydrolipoyl)lysine	CoA; enzyme N6-(S-acetyldihydrolipoyl)lysine	2.4	Azotobacter vinelandii	0.00417	0.0635028	2.4	4	2.5	No			Wild-type	with dihydrolipoamide, wild-type enzyme
2.3.1.8	acetyl-CoA:phosphate acetyltransferase	acetyl-CoA; phosphate	CoA; acetyl phosphate	29.6	Escherichia coli	0.03	57.9	4500	13	1.51244	No	30	8	Temperature (ddT=5.0)	wild-type, pH 8.0, 30°C
2.3.1.8	acetyl-CoA:phosphate acetyltransferase	CoA; acetyl phosphate	acetyl-CoA; phosphate	227	Escherichia coli	0.15	48.5073	5190	62	1.51244	No	30	8	Temperature (ddT=5.0)	wild-type, pH 8.0, 30°C
2.4.2.1	purine-nucleoside:phosphate ribosyltransferase	purine ribonucleoside; phosphate; purine 2'-deoxyribonucleoside	purine; alpha-D-ribose 1-phosphate; 2-deoxy-alpha-D-ribose 1-phosphate	3.5	Mycobacterium tuberculosis	0.09	13.1491	113.6	24	1.42464	No	25	7	Shorter comment	cosubstrate guanosine, pH 7.0, 25°C
2.4.2.1	purine-nucleoside:phosphate ribosyltransferase	purine; alpha-D-ribose 1-phosphate; 2-deoxy-alpha-D-ribose 1-phosphate	purine ribonucleoside; phosphate; purine 2'-deoxyribonucleoside	120	Bos taurus	100	109.545	120	2	5	No			Shorter comment	reaction with guanine
2.4.2.12	nicotinamide-D-ribonucleotide:diphosphate phospho-alpha-D-ribosyltransferase	nicotinamide; 5-phospho-alpha-D-ribose 1-diphosphate	nicotinamide D-ribonucleotide; diphosphate	0.00137	Homo sapiens	0.00137	0.00330021	0.02	4	4.09671	No		7.5	Shorter comment	+/-0.00002, KM/kcat = 1600 1/M*s, pH 7.5, 100 microM PRPP, 88 nM NAMPT
2.4.2.7	AMP:diphosphate phospho-D-ribosyltransferase	AMP; diphosphate	adenine; 5-phospho-alpha-D-ribose 1-diphosphate	0.0095	Giardia intestinalis	0.0095	0.0095	11.3	3	4.09935	No			Only group	Median of 3 entries: [0.0095] ; [0.0095] ; [11.3]
2.4.2.7	AMP:diphosphate phospho-D-ribosyltransferase	adenine; 5-phospho-alpha-D-ribose 1-diphosphate	AMP; diphosphate	9.33	Escherichia coli	0.0001	5	1000	19	1.51244	No			Phylogenetic difference (ddist=2.600)	cosubstrate 5-phospho-alpha-D-ribose 1-diphosphate
2.4.2.8	IMP:diphosphate phospho-D-ribosyltransferase	IMP; diphosphate	hypoxanthine; 5-phospho-alpha-D-ribose 1-diphosphate	1.77679	Homo sapiens	0.001	0.23	90	24	4.09671	No			Wild-type	Median of 4 entries: [0.038] wild-type enzyme; [0.041] wild-type enzyme; [77] wild-type enzyme; [90] wild-type enzyme
2.4.2.8	IMP:diphosphate phospho-D-ribosyltransferase	hypoxanthine; 5-phospho-alpha-D-ribose 1-diphosphate	IMP; diphosphate	0.0139	Mycobacterium tuberculosis	0.0139	2.92233	74.8	72	1.42464	No	25	7.4	Shorter comment	pH 7.4, 25°C, recombinant enzyme, with guanine
2.4.2.9	UMP:diphosphate phospho-alpha-D-ribosyltransferase	UMP; diphosphate	uracil; 5-phospho-alpha-D-ribose 1-diphosphate	0.0015	Bacillus subtilis	0.0015	0.0015	0.0015	1	0.87636	No			Only option	reverse reaction
2.4.2.9	UMP:diphosphate phospho-alpha-D-ribosyltransferase	uracil; 5-phospho-alpha-D-ribose 1-diphosphate	UMP; diphosphate	0.36	Sulfolobus solfataricus	0.36	1.48189	6.1	2	4.29841	No			Shorter comment	unactivated enzyme
2.5.1.6	ATP:L-methionine S-adenosyltransferase	ATP; L-methionine; H2O	phosphate; diphosphate; S-adenosyl-L-methionine	0.93	Mycobacterium smegmatis	8.83e-05	1.54	7.5	27	1.42509	No	37	8.2	Phylogenetic difference (ddist=0.080)	37°C, pH 8.2
2.7.1.11	ATP:D-fructose-6-phosphate 1-phosphotransferase	ATP; D-fructose 6-phosphate	ADP; D-fructose 1,6-bisphosphate	111	Escherichia coli	0.015	60	357	27	1.51244	No	30	8.5	Temperature (ddT=5.0)	pH 8.5, 30°C, wild-type PFK
2.7.1.113	ATP:deoxyguanosine 5'-phosphotransferase	ATP; deoxyguanosine	ADP; dGMP	1.60801	Bacillus subtilis	0.03	1.53	3	12	0.87636	No	37	8.5	Shorter comment	Median of 4 entries: [1.41] pH 8.5, 37°C, cosubstrate UTP; [1.53] pH 8.5, 37°C, cosubstrate ATP; [1.69] pH 8.5, 37°C, cosubstrate GTP; [2.25] pH 8.5, 37°C, cosubstrate CTP
2.7.1.21	ATP:thymidine 5'-phosphotransferase	ATP; thymidine	ADP; dTMP	0.0979796	Arabidopsis thaliana	0.003	1.5	282	33	4.06942	No			Phylogenetic difference (ddist=0.040)	Median of 2 entries: [0.02] isoform TK1b, pH and temperature not specified in the publication; [0.48] isoform TK1a, pH and temperature not specified in the publication
2.7.1.23	ATP:NAD+ 2'-phosphotransferase	ATP; NAD+	ADP; NADP+	13.78	Listeria monocytogenes	0.41	3.70891	424	28	0.87684	No			Shorter comment	wild-type
2.7.1.23	ATP:NAD+ 2'-phosphotransferase	ADP; NADP+	ATP; NAD+	2.3	Corynebacterium glutamicum	2.3	22.0817	212	2	1.47404	No	30	7.3	Phylogenetic difference (ddist=4.560)	in 100 mM HEPES, pH 7.3, containing 20 mM MgCl2, at 30°C
2.7.1.26	ATP:riboflavin 5'-phosphotransferase	ATP; riboflavin	ADP; FMN	0.7	Bacillus subtilis	0.042	1.1	7.12	37	0.87636	No	37		Phylogenetic difference (ddist=0.480)	37°C
2.7.1.30	ATP:glycerol 3-phosphotransferase	ATP; glycerol	ADP; sn-glycerol 3-phosphate	4900	Cellulomonas sp.	1670	2549.51	4900	4	1.5	No	37	7.5	Wild-type	wild type enzyme, at pH 7.5 and 37°C
2.7.1.40	ATP:pyruvate 2-O-phosphotransferase	ADP; phosphoenolpyruvate	ATP; pyruvate	3204	Geobacillus stearothermophilus	0.16	48.8438	3204	28	1.5	No	30	7.2	Wild-type	wild type enzyme, in the presence of 0.1 mM ribose 5'-phosphate, in 50 mM imidazole-HCl buffer, pH 7.2, 50 mM KCl, 7 mM MgCl2, 0.12 mM NADH, 0.02 mg/ml lactate dehydrogenase, 2 mM PEP, and 4 mM ADP, at 30°C
2.7.1.74	NTP:deoxycytidine 5'-phosphotransferase	NTP; deoxycytidine	NDP; dCMP	0.0381051	Homo sapiens	0.033	0.088	1.8	11	4.09671	No			Temperature (ddT=2.0)	Median of 2 entries: [0.033] less than 0.001 mM, wild type enzyme with ATP as cosubstrate; [0.044] less than 0.001 mM, wild type enzyme with UTP as cosubstrate
2.7.1.76	ATP:2'-deoxyadenosine 5'-phosphotransferase	ATP; 2'-deoxyadenosine	ADP; dAMP	1.11499	Mycoplasma mycoides	0.84	1.64122	3.7	6	0	No	37	7.6	Phylogenetic difference (ddist=0.880)	Median of 2 entries: [0.84] pH 7.6, 37°C, recombinant enzyme; [1.48] pH 7.6, 37°C, recombinant enzyme
2.7.2.1	ATP:acetate phosphotransferase	ATP; acetate	ADP; acetyl phosphate	246.739	Lactococcus lactis	0.11	238	1500	63	1.01287	No	30	7.5	Phylogenetic difference (ddist=0.040)	Median of 2 entries: [80] pH 7.5, 30°C, recombinant His-tagged isozyme AckA2; [761] pH 7.5, 30°C, recombinant His-tagged isozyme AckA1
2.7.2.1	ATP:acetate phosphotransferase	ADP; acetyl phosphate	ATP; acetate	320.57	Lactococcus lactis	0.42	1071.49	3869	46	1.01287	No	30	7.5	Phylogenetic difference (ddist=0.040)	Median of 2 entries: [93] pH 7.5, 30°C, recombinant His-tagged isozyme AckA2; [1105] pH 7.5, 30°C, recombinant His-tagged isozyme AckA1
2.7.2.3	ATP:3-phospho-D-glycerate 1-phosphotransferase	ATP; 3-phospho-D-glycerate	ADP; 3-phospho-D-glyceroyl phosphate	529.396	Pseudomonas sp.	0.05	200	916	76	1.42881	No			Shorter comment	Median of 2 entries: [519] native wild-type enzyme; [540] native wild-type enzyme
2.7.2.3	ATP:3-phospho-D-glycerate 1-phosphotransferase	ADP; 3-phospho-D-glyceroyl phosphate	ATP; 3-phospho-D-glycerate	2631.5	Homo sapiens	0.06	250	2633	27	4.09671	No			Temperature (ddT=5.0)	Median of 4 entries: [2630] wild-type enzyme; [2633] wild-type enzyme; [2630] wild-type enzyme; [2633] wild-type enzyme
2.7.4.14	ATP:CMP(UMP) phosphotransferase	ATP; dCMP; UMP	ADP; dCDP; UDP	7.64	Arabidopsis thaliana	0.036	25.6905	217	14	4.06942	No		6.5	Phylogenetic difference (ddist=0.040)	pH 6.5
2.7.4.22	ATP:UMP phosphotransferase	ATP; UMP	ADP; UDP	144.914	Streptococcus pneumoniae	19	175	545.2	7	0.98782	No			Phylogenetic difference (ddist=0.680)	Median of 2 entries: [120] in the presence of MnCl2; [175] in the presence of MgCl2
2.7.4.3	ATP:AMP phosphotransferase	ATP; AMP	ADP	0.053	Bacillus subtilis	0.0037	0.65	879.5	37	0.87636	No	35	7.2	Temperature (ddT=10.0)	wild-type, pH 7.2, 35°C
2.7.4.3	ATP:AMP phosphotransferase	ADP	ATP; AMP	783	Homo sapiens	783	783	783	1	4.09671	No			Only option
2.7.4.8	ATP:(d)GMP phosphotransferase	ATP; GMP	ADP; GDP	52	Bacillus subtilis	23	578.024	1500	12	0.87636	No	30	7.5	Phylogenetic difference (ddist=0.640)	recombinant isozyme, pH 7.5, 30°C
2.7.4.9	ATP:dTMP phosphotransferase	ATP; dTMP	ADP; dTDP	8.9	Streptococcus pneumoniae	0.14	3	38.1	13	0.98782	No	25	8.5	Phylogenetic difference (ddist=0.720)	Median of 2 entries: [8.9] pH 8.5, 25°C; [8.9] pH 8.5, 25°C
2.7.6.1	ATP:D-ribose-5-phosphate diphosphotransferase	ATP; D-ribose 5-phosphate	AMP; 5-phospho-alpha-D-ribose 1-diphosphate	0.66	Mycobacterium tuberculosis	0.66	40.6682	311	6	1.42464	No	25	8	Shorter comment	in 50 mM Tris-HCl pH 8.0, at 25°C
2.7.7.18	ATP:beta-nicotinate-D-ribonucleotide adenylyltransferase	ATP; beta-nicotinate D-ribonucleotide	diphosphate; deamido-NAD+	5.5	Mycobacterium tuberculosis	0.002	0.2	5.5	11	1.42464	No	37	7.5	Wild-type	pH 7.5, 37°C, recombinant wild-type enzyme
2.7.7.2	ATP:FMN adenylyltransferase	ATP; FMN	diphosphate; FAD	0.0917	Corynebacterium ammoniagenes	8.33e-05	0.0444297	0.88	34	1.47404	No	25	7	Wild-type	Median of 2 entries: [0.0917] pH 7.0, 25°C, recombinant wild-type enzyme; [0.0917] pH 7.0, 25°C, recombinant wild-type enzyme
2.7.7.2	ATP:FMN adenylyltransferase	diphosphate; FAD	ATP; FMN	7.5e-05	Corynebacterium ammoniagenes	7.5e-05	7.5e-05	7.5e-05	1	1.47404	No	25	7.6	Only option	pH 7.6, 25°C
2.7.7.41	CTP:phosphatidate cytidylyltransferase	CTP; phosphatidate	diphosphate; CDP-diacylglycerol	8.92	Saccharomyces cerevisiae	8.92	8.92	8.92	2	4.24544	No	30	6.5	Only group	Median of 2 entries: [8.92] pH 6.5, 30°C; [8.92] pH 6.5, 30°C
2.7.7.7	2'-deoxyribonucleoside-5'-triphosphate:DNA deoxynucleotidyltransferase (DNA-directed)	2'-deoxyribonucleoside 5'-triphosphate; DNAn	diphosphate; DNAn+1	2.5	Enterobacteria phage PRD1	0.0667	2.54951	116	14	7	No	30	7.6	Non-extremophile	pH 7.6, 30°C
2.7.7.9	UTP:alpha-D-glucose-1-phosphate uridylyltransferase	UTP; alpha-D-glucose 1-phosphate	diphosphate; UDP-glucose	58.0545	Streptococcus equi	0.45	31.1468	93.44	12	1.00083	No	37	7.5	Phylogenetic difference (ddist=0.360)	Median of 2 entries: [48.81] pH 7.5, 37°C; [69.05] pH 7.5, 37°C
2.7.7.9	UTP:alpha-D-glucose-1-phosphate uridylyltransferase	diphosphate; UDP-glucose	UTP; alpha-D-glucose 1-phosphate	6.35	Nostoc sp.	6.35	6.35	6.35	1	1.39876	No	37	7.5	Only option	pH 7.5, 37°C
2.7.8.7	CoA-[4'-phosphopantetheine]:apo-[acyl-carrier protein] 4'-pantetheinephosphotransferase	CoA-[4'-phosphopantetheine]; apo-[acyl-carrier protein]	adenosine 3',5'-bisphosphate; holo-[acyl-carrier protein]	0.00083	Bacillus subtilis	0.00017	0.0323589	2.08	26	0.87636	No	37	8	Wild-type	pH 8.0, 37°C, recombinant His-tagged enzyme, wild-type ACP substrate from Leishmania major
3.1.3.7	adenosine-3'(2'),5'-bisphosphate 3'(2')-phosphohydrolase	adenosine 3',5'-bisphosphate; H2O	AMP; phosphate	5.4	Mycobacterium tuberculosis	0.069	3.98447	22	8	1.42464	No		8.5	Temperature (ddT=22.0)	in 50 mM Tris buffer, pH 8.5, 0.5 mM Mg2+
3.3.1.1	S-adenosyl-L-homocysteine hydrolase	S-adenosyl-L-homocysteine; H2O	L-homocysteine; adenosine	0.79	Homo sapiens	0.4	0.56	0.79	3	4.09671	No	37	7.2	Wild-type	recombinant wild type enzyme, at pH 7.2 and 37°C
3.3.1.1	S-adenosyl-L-homocysteine hydrolase	L-homocysteine; adenosine	S-adenosyl-L-homocysteine; H2O	6666	Homo sapiens	3	36.6279	6666	4	4.09671	No	30	7.2	Phylogenetic difference (ddist=0.080)	pH 7.2, 30°C
3.5.1.25	N-acetyl-D-glucosamine-6-phosphate amidohydrolase	N-acetyl-D-glucosamine 6-phosphate; H2O	D-glucosamine 6-phosphate; acetate	110	Thermotoga maritima	0.02	24	177	25	1.27496	No			Phylogenetic difference (ddist=0.240)
3.5.4.12	dCMP aminohydrolase	dCMP; H2O	dUMP; NH3	960	Homo sapiens	24.9	255	1400	7	4.09671	No			Phylogenetic difference (ddist=0.920)
3.5.4.5	cytidine/2'-deoxycytidine aminohydrolase	cytidine; H2O; 2'-deoxycytidine	uridine; NH3; 2'-deoxyuridine	4.8	Mycobacterium tuberculosis	4.8	4.8	4.8	1	1.42464	No	25	7.5	Only option	in 50 mM Tris-HCl buffer pH 7.5 at 25°C
3.5.4.9	5,10-methenyltetrahydrofolate 5-hydrolase (ring-opening)	5,10-methenyltetrahydrofolate; H2O	10-formyltetrahydrofolate	134	Homo sapiens	107	130.966	185	8	4.09671	No			Wild-type	forward reaction, recombinant wild-type enzyme
3.5.99.6	2-amino-2-deoxy-alpha-D-glucose-6-phosphate aminohydrolase (ketol isomerizing)	alpha-D-glucosamine 6-phosphate; H2O	D-fructose 6-phosphate; NH3	2	Bacillus subtilis	0.044	77.4597	1800	38	0.87636	No	22	8	Phylogenetic difference (ddist=0.640)	22°C, pH 8.0
3.5.99.6	2-amino-2-deoxy-alpha-D-glucose-6-phosphate aminohydrolase (ketol isomerizing)	D-fructose 6-phosphate; NH3	alpha-D-glucosamine 6-phosphate; H2O	455	Escherichia coli	5.8	41.8368	455	4	1.51244	No	30	7.7	Phylogenetic difference (ddist=3.520)	pH 7.7, 30°C
3.6.1.1	diphosphate phosphohydrolase	diphosphate; H2O	phosphate	817	Bacillus sp. PS3	0.16	163.8	6480	72	0.89732	No	37	8	Wild-type	wild type enzyme, pH 8.0, 37°C
3.6.1.12	dCTP nucleotidohydrolase	dCTP; H2O	dCMP; diphosphate	1.37	Mus musculus	0.367	1.37	5.7	3	4.09214	No	30	8	Temperature (ddT=5.0)	pH 8.0, 30°C
3.6.1.23	dUTP nucleotidohydrolase	dUTP; H2O	dUMP; diphosphate	1.22	Mycobacterium tuberculosis	0.0003	5.89915	58.3	48	1.42464	No	20	7.5	Wild-type	wild type enzyme, in 1 mM HEPES pH 7.5, 100 mM KCl, and 5 mM MgCl2, at 20°C
3.6.3.14	ATP phosphohydrolase (H+-transporting)	ATP; H2O; H+	ADP; phosphate; H+	390	Bacillus sp.	0.0093	5.34	539	9	0.89732	No	25		Wild-type	wild type enzyme, at 25°C, pH not specified in the publication
3.6.3.14	ATP phosphohydrolase (H+-transporting)	ADP; phosphate; H+	ATP; H2O; H+	16.4924	Bacillus sp.	16	18.4391	66	6	0.89732	No	30		Phylogenetic difference (ddist=0.600)	Median of 2 entries: [16] pH not specified in the publication, 30°C; [17] pH not specified in the publication, 30°C
4.1.2.13	D-fructose-1,6-bisphosphate D-glyceraldehyde-3-phosphate-lyase (glycerone-phosphate-forming)	D-fructose 1,6-bisphosphate	glycerone phosphate; D-glyceraldehyde 3-phosphate	2.95	Bacillus cereus	0.0002	4.02	64.5	107	0.89599	No	30	8	Temperature (ddT=5.0)	in Tris-HCl pH 8.0, at 30°C
4.1.2.13	D-fructose-1,6-bisphosphate D-glyceraldehyde-3-phosphate-lyase (glycerone-phosphate-forming)	glycerone phosphate; D-glyceraldehyde 3-phosphate	D-fructose 1,6-bisphosphate	0.002	Methylococcus capsulatus	0.002	0.56	12.6	9	2.5	No	30	7.5	Phylogenetic difference (ddist=1.800)	in the absence of Co2+, at pH 7.5, 30°C
4.1.2.4	2-deoxy-D-ribose-5-phosphate acetaldehyde-lyase (D-glyceraldehyde-3-phosphate-forming)	2-deoxy-D-ribose 5-phosphate	D-glyceraldehyde 3-phosphate; acetaldehyde	7.54983	Thermus thermophilus	0.58	27.1662	521	10	1.42073	No	25	7.4	Phylogenetic difference (ddist=0.080)	Median of 2 entries: [5] pH 7.4, 25°C; [11.4] pH 7.4, 35°C
4.2.1.11	2-phospho-D-glycerate hydro-lyase (phosphoenolpyruvate-forming)	2-phospho-D-glycerate	phosphoenolpyruvate; H2O	52.7	Klebsiella pneumoniae	0.018	37	230	11	2.5	No		7.8	Phylogenetic difference (ddist=1.600)	in 50 mM imidazole-HCl buffer, pH 7.8, with 1 mM MgSO4, 0.4 M KCl
4.2.1.11	2-phospho-D-glycerate hydro-lyase (phosphoenolpyruvate-forming)	phosphoenolpyruvate; H2O	2-phospho-D-glycerate	15.47	Klebsiella pneumoniae	15.47	22.9579	34.07	2	2.5	No		7.8	Phylogenetic difference (ddist=1.600)	in 50 mM imidazole-HCl buffer, pH 7.8, with 1 mM MgSO4, 0.4 M KCl
5.1.3.1	D-ribulose-5-phosphate 3-epimerase	D-ribulose 5-phosphate	D-xylulose 5-phosphate	100	Streptococcus pyogenes	0.00033	232.379	7100	12	1.0072	No			Shorter comment	RPE metal-free, stoichiometry of Zn2+: 0.1 ion per polypeptide, substrate 10 mM D-ribulose 5-phosphate
5.1.3.1	D-ribulose-5-phosphate 3-epimerase	D-xylulose 5-phosphate	D-ribulose 5-phosphate	1300	Saccharomyces cerevisiae	1300	1300	1300	1	4.24544	No			Only option
5.1.3.2	UDP-alpha-D-glucose 4-epimerase	UDP-alpha-D-glucose	UDP-alpha-D-galactose	760	Escherichia coli	0.073	12.8	760	17	1.51244	No		6.2	Wild-type	pH 6.2, temperature not specified in the publication, recombinant wild-type enzyme
5.1.3.2	UDP-alpha-D-glucose 4-epimerase	UDP-alpha-D-galactose	UDP-alpha-D-glucose	199.1	Thermus thermophilus	0.046	33.9411	960	36	1.42073	No		8.9	Phylogenetic difference (ddist=0.080)	recombinant enzyme, 100 mM glycine-NaOH (pH 8.9), 4 mM UDP-galactose, 1 mM beta-NAD+, 8.3 mM MgCl2, and 5.4 U of UDP-glucose dehydrogenase
5.3.1.1	D-glyceraldehyde-3-phosphate aldose-ketose-isomerase	D-glyceraldehyde 3-phosphate	glycerone phosphate	68330	Mycobacterium tuberculosis	0.25	3831.5	57500000	130	1.42464	No	22	7.6	Phylogenetic difference (ddist=0.080)	22°C, pH 7.6
5.3.1.1	D-glyceraldehyde-3-phosphate aldose-ketose-isomerase	glycerone phosphate	D-glyceraldehyde 3-phosphate	367	Leishmania mexicana	63	367	1080	9	4.10246	No			Phylogenetic difference (ddist=0.920)
5.3.1.6	D-ribose-5-phosphate aldose-ketose-isomerase	D-ribose 5-phosphate	D-ribulose 5-phosphate	120	Mycobacterium tuberculosis	0.0421	320	52000	21	1.42464	No			Temperature (ddT=2.0)
5.3.1.6	D-ribose-5-phosphate aldose-ketose-isomerase	D-ribulose 5-phosphate	D-ribose 5-phosphate	2	Trypanosoma cruzi	2	50	39530	3	5	No	30	7.6	Non-extremophile	in 50 mM Tris-HCl (pH 7.6), 150 mM NaCl and 5 mM MESNA, at 30°C
5.3.1.8	D-mannose-6-phosphate aldose-ketose-isomerase	D-mannose 6-phosphate	D-fructose 6-phosphate	1.38	Pseudomonas aeruginosa	0.076	20	112100	27	1.40438	No	25	7	Wild-type	wild-type, pH 7.0, 25°C
5.3.1.8	D-mannose-6-phosphate aldose-ketose-isomerase	D-fructose 6-phosphate	D-mannose 6-phosphate	141	Thermus thermophilus	141	141	141	1	1.42073	No	80	7	Only option	wild type enzyme, pH 7.0, 80°C
5.3.1.9	D-glucose-6-phosphate aldose-ketose-isomerase	D-glucose 6-phosphate	D-fructose 6-phosphate	929	Ruminiclostridium thermocellum	0.04	240	2765	35	1.5	No	37	7.5	Shorter comment	free enzyme, in 100 mM HEPES, 10 mM Mg2+ and 0.5 mM Mn2+, pH 7.5, 37°C
5.3.1.9	D-glucose-6-phosphate aldose-ketose-isomerase	D-fructose 6-phosphate	D-glucose 6-phosphate	650	Homo sapiens	0.0003	15	3330	35	4.09671	No	30	7.5	Wild-type	pH 7.5, 30°C, recombinant wild-type enzyme
5.4.2.12	D-phosphoglycerate 2,3-phosphomutase (2,3-diphosphoglycerate-independent)	2-phospho-D-glycerate	3-phospho-D-glycerate	199	Leishmania mexicana	2.04	5.06596	199	6	4.10246	No	25	7.6	Phylogenetic difference (ddist=0.920)	pH 7.6, 25°C
5.4.2.12	D-phosphoglycerate 2,3-phosphomutase (2,3-diphosphoglycerate-independent)	3-phospho-D-glycerate	2-phospho-D-glycerate	102	Wolbachia sp.	1.51	50.6458	434	10	1.71591	No	30	7.5	Shorter comment	recombinant His-tagged enzyme, pH 7.5, 30°C
5.4.2.7	alpha-D-ribose 1,5-phosphomutase	D-ribose 5-phosphate	alpha-D-ribose 1-phosphate	10.2	Bacillus cereus	10.2	10.2	10.2	1	0.89599	No	23	8	Only option	in 25 mM Tris-HCl, pH 8.0, and 0.1 mM MnCl2, 0.0005 mM glucose 1,6-bisphosphate,at 23°C
5.4.99.9	UDP-alpha-D-galactopyranose furanomutase	UDP-alpha-D-galactopyranose	UDP-alpha-D-galactofuranose	66	Deinococcus radiodurans	0.0224	2.47386	66	20	1.45253	No		7	Phylogenetic difference (ddist=0.040)	wild type enzyme, in 50 mM sodium phosphate buffer pH 7.0
6.1.1.1	L-tyrosine:tRNATyr ligase (AMP-forming)	ATP; L-tyrosine; tRNA(Tyr)	AMP; diphosphate; L-tyrosyl-tRNA(Tyr)	2.12113	Escherichia coli	0.01	4.49889	45	40	1.51244	No	30	7.5	Temperature (ddT=5.0)	Median of 2 entries: [0.74] wild-type enzyme, pH 7.5, 30°C; [6.08] wild-type enzyme, pH 7.5, 30°C
6.1.1.10	L-methionine:tRNAMet ligase (AMP-forming)	ATP; L-methionine; tRNA(Met)	AMP; diphosphate; L-methionyl-tRNA(Met)	0.49	Staphylococcus aureus	0.001	1	47	81	0.90898	No			Shorter comment	wild-type, aminoacylation reaction
6.1.1.11	L-serine:tRNASer ligase (AMP-forming)	ATP; L-serine; tRNA(Ser)	AMP; diphosphate; L-seryl-tRNA(Ser)	0.057	Streptomyces sp.	1.1e-08	0.464973	7	86	1.35882	No	30		Temperature (ddT=5.0)	30°C, aminoacylation
6.1.1.12	L-aspartate:tRNAAsp ligase (AMP-forming)	ATP; L-aspartate; tRNA(Asp)	AMP; diphosphate; L-aspartyl-tRNA(Asp)	0.042	Thermus thermophilus	0.00016	0.2	79	31	1.42073	No	37	7.2	Phylogenetic difference (ddist=0.080)	recombinant wild-type enzyme, pH 7.2, 37°C
6.1.1.14	glycine:tRNAGly ligase (AMP-forming)	ATP; glycine; tRNA(Gly)	AMP; diphosphate; glycyl-tRNA(Gly)	0.490816	Saccharomyces cerevisiae	0.19	0.33	0.73	3	4.24544	No	25	7.5	Shorter comment	Median of 2 entries: [0.33] wild type isoform GlyRS1, in 50 mM HEPES (pH 7.5), 50 mM KCl, 15 mM MgCl2, 5 mM dithiothreitol, at 25°C; [0.73] wild type isoform GlyRS2, in 50 mM HEPES (pH 7.5), 50 mM KCl, 15 mM MgCl2, 5 mM dithiothreitol, at 25°C
6.1.1.15	L-proline:tRNAPro ligase (AMP-forming)	ATP; L-proline; tRNA(Pro)	AMP; diphosphate; L-prolyl-tRNA(Pro)	60	Clostridium sticklandii	0.0091	6.93988	210	56	1.0986	No	37	7.2	Phylogenetic difference (ddist=0.320)	recombinant enzyme, pH 7.2, 37°C
6.1.1.16	L-cysteine:tRNACys ligase (AMP-forming)	ATP; L-cysteine; tRNA(Cys)	AMP; diphosphate; L-cysteinyl-tRNA(Cys)	4.4	Escherichia coli	0.001	0.5	142	57	1.51244	No	30	7	Temperature (ddT=5.0)	Median of 3 entries: [4.4] 30°C, pH 7.0, wild-type enzyme; [4.8] 30°C, pH 7.0, wild-type enzyme; [2.9] 30°C, pH 7.0, wild-type enzyme
6.1.1.17	L-glutamate:tRNAGlu ligase (AMP-forming)	ATP; L-glutamate; tRNA(Glu)	AMP; diphosphate; L-glutamyl-tRNA(Glu)	0.408	Mycobacterium tuberculosis	0.0058	1.05877	3.61	22	1.42464	No	37	7.3	Phylogenetic difference (ddist=0.080)	Median of 3 entries: [0.272] pH 7.3, 37°C; [2.15] pH 7.3, 37°C; [0.408] pH 7.3, 37°C
6.1.1.19	L-arginine:tRNAArg ligase (AMP-forming)	ATP; L-arginine; tRNA(Arg)	AMP; diphosphate; L-arginyl-tRNA(Arg)	21.9	Escherichia coli	0.00016	1.8	26	31	1.51244	No			pH (ddpH=0.3)	Median of 3 entries: [2] transfer RNA isoacceptor for arginine UCU; [21.9] transfer RNA isoacceptor for arginine UCU; [26] transfer RNA isoacceptor for arginine UCU
6.1.1.2	L-tryptophan:tRNATrp ligase (AMP-forming)	ATP; L-tryptophan; tRNA(Trp)	AMP; diphosphate; L-tryptophyl-tRNATrp	22	Bacillus subtilis	0.0009	1.4	419	57	0.87636	No	25	9	Temperature (ddT=3.0)	Median of 2 entries: [22] 25°C, pH 9.0, wild-type enzyme, activation of Trp; [22] 25°C, pH 9.0, wild-type enzyme, activation of Trp
6.1.1.20	L-phenylalanine:tRNAPhe ligase (AMP-forming)	ATP; L-phenylalanine; tRNA(Phe)	AMP; diphosphate; L-phenylalanyl-tRNA(Phe)	1.12	Thermus thermophilus	0.055	2.88	603	31	1.42073	No	30	8	Phylogenetic difference (ddist=0.080)	in 50 mM Tris-HCl, pH 8.0, 30 mM MgCl2, 20 mM KCl, 5 mM dithiothreitol, at 30°C
6.1.1.21	L-histidine:tRNAHis ligase (AMP-forming)	ATP; L-histidine; tRNA(His)	AMP; diphosphate; L-histidyl-tRNA(His)	4	Caulobacter vibrioides	0.0004	1.85855	142	28	1.43137	No	30	7.5	Phylogenetic difference (ddist=0.080)	wild-type Caulobacter crescentus tRNAHis, pH 7.5, 30°C
6.1.1.22	L-asparagine:tRNAAsn ligase (AMP-forming)	ATP; L-asparagine; tRNA(Asn)	AMP; diphosphate; L-asparaginyl-tRNA(Asn)	1.6	Escherichia coli	0.3	2	10.1	23	1.51244	No			Shorter comment	wild-type, aminoacylation
6.1.1.3	L-threonine:tRNAThr ligase (AMP-forming)	ATP; L-threonine; tRNA(Thr)	AMP; diphosphate; L-threonyl-tRNA(Thr)	0.037	Thermus thermophilus	0.00157	2.38747	90	24	1.42073	No			Shorter comment
6.1.1.4	L-leucine:tRNALeu ligase (AMP-forming)	ATP; L-leucine; tRNA(Leu)	AMP; diphosphate; L-leucyl-tRNA(Leu)	1.28	Aquifex aeolicus	0.003	3.1	171	219	1.343	No			Temperature (ddT=2.0)
6.1.1.5	L-isoleucine:tRNAIle ligase (AMP-forming)	ATP; L-isoleucine; tRNA(Ile)	AMP; diphosphate; L-isoleucyl-tRNA(Ile)	0.35	Staphylococcus aureus	0.18	3	104	15	0.90898	No	22	7.9	Shorter comment	tRNAIle aminoacylation reaction, pH 7.9, 22°C
6.1.1.6	L-lysine:tRNALys ligase (AMP-forming)	ATP; L-lysine; tRNA(Lys)	AMP; diphosphate; L-lysyl-tRNA(Lys)	41.7	Bacillus cereus	0.00012	0.794984	85	78	0.89599	No	37	7.2	Wild-type	wild type enzyme, in 100 mM HEPES (pH 7.2), 30 mM KCl, 10 mM MgCl2, at 37°C
6.1.1.7	L-alanine:tRNAAla ligase (AMP-forming)	ATP; L-alanine; tRNA(Ala)	AMP; diphosphate; L-alanyl-tRNA(Ala)	84	Escherichia coli	0.0074	1.7	120	21	1.51244	No			Temperature (ddT=2.0)	wild-type
6.1.1.9	L-valine:tRNAVal ligase (AMP-forming)	ATP; L-valine; tRNA(Val)	AMP; diphosphate; L-valyl-tRNA(Val)	51	Escherichia coli	0.064	2.22036	57	24	1.51244	No	25	7.5	Shorter comment	ATP-diphosphate exchange reaction, wild-type enzyme, pH 7.5, 25°C
6.3.1.5	deamido-NAD+:ammonia ligase (AMP-forming)	ATP; deamido-NAD+; NH3	AMP; diphosphate; NAD+	0.25	Francisella tularensis	0.2	0.223607	0.25	2	2.5	No			Phylogenetic difference (ddist=3.520)
6.3.2.17	tetrahydropteroyl-gamma-polyglutamate:L-glutamate gamma-ligase (ADP-forming)	ATP; tetrahydropteroyl-[gamma-Glu]n; L-glutamate	ADP; phosphate; tetrahydropteroyl-[gamma-Glu]n+1	1.7	Sus scrofa	1.7	1.7	1.7	1	5	No			Only option
6.3.3.2	5-formyltetrahydrofolate cyclo-ligase (ADP-forming)	ATP; 5-formyltetrahydrofolate	ADP; phosphate; 5,10-methenyltetrahydrofolate	0.888819	Mycoplasma pneumoniae	0.02	0.94	5.3	19	1.27786	No	37	6	Shorter comment	Median of 2 entries: [0.79] wild type enzyme, in 200 mM MES pH 6.0, with 30 mM NaCl, 10 mM MgCl2, 0.1% (v/v) Triton X-100, and 0.01% (v/v) 2-mercaptoethanol, at 37°C; [1] wild type enzyme, in 200 mM MES pH 6.0, with 30 mM NaCl, 10 mM MgCl2, 0.1% (v/v) Triton X-100, and 0.01% (v/v) 2-mercaptoethanol, at 37°C
6.3.4.2	UTP:L-glutamine amido-ligase (ADP-forming)	ATP; UTP; L-glutamine; H2O; NH3	ADP; phosphate; CTP; L-glutamate; NH3	1.49	Lactococcus lactis	0.031	6.1	14	48	1.01287	No	30	8	Phylogenetic difference (ddist=0.480)	30°C, pH 8.0
6.3.5.7	L-glutamyl-tRNAGln:L-glutamine amido-ligase (ADP-forming)	ATP; L-glutamyl-tRNA(Gln); L-glutamine	ADP; phosphate; L-glutaminyl-tRNA(Gln); L-glutamate	0.548544	Streptococcus pyogenes	0.052	1.03923	11.8	12	1.0072	No			Phylogenetic difference (ddist=0.640)	Median of 2 entries: [0.59] ; [0.51]

## Sheet: Manually found kcat numbers
Manually added kcat values from BRENDA whenever substrate used in model reaction did not match the one found from KEGG
EC number	kcat (1/s)	Substrate	Organism
1.17.4.1	12.9	CDP	E. coli
3.1.3.27	24	1,2-dioleoyl-sn-glycero-3-phosphate	Ecoli
3.4.11.18	22.5	L-Met-PSI[C(O)S]Gly-L-Phe	Ecoli
3.5.1.88	0.17	N-formyl-Met-Ala-Ser	B subtilis
2.7.4.25	30	dCMP	Mycobacterium tuberculosis
3.6.1.15	0.3	dCTP	Deinococcus radiodurans
3.6.1.15	1.12	dCDP	Deinococcus radiodurans
3.6.1.65	9.28	CTP	E. coli
3.4.21.53	0.26	ATP	E. coli
3.6.3.8	21.35	ATP	Homo sapiens
2.4.2.1	145	2 deoxy d ribose 1 phosphate	Bos taurus
2.4.2.1	4	Guanosine	Mycobacterium tuberculosis
2.4.2.1	48	Guanine	Homo sapiens
2.4.2.1	5.1	deoxyguanosine
2.7.4.8	43	dGMP	Plasmodium falciparum
2.7.4.25	52	CMP	Mycobacterium tuberculosis
2.7.1.21	0.2598	deoxyuridine	Arabidopsis thaliana
3.1.3.89	0.16	dTMP	E. coli
3.1.3.89	0.23	dUMP	E. coli
3.1.3.89	0.2	dGMP	E. coli
3.1.3.89	0.14	dAMP	E. coli
3.1.3.5	11	5' GMP	Ecoli
6.3.5.7	0.51	Gln	Streptococcus pyrogens
6.3.5.7	0.59	ATP	Streptococcus pyrogens
kcat values obtained from literature
EC number	kcat (1/s)	Substrate	Organism	doi
2.7.1.74	1.23	deoxycytidine	Mycoplasma mycoides	10.1046/j.1365-2958.2001.02700.x
2.7.1.113	0.61	deoxyguanosine	Mycoplasma mycoides	10.1046/j.1365-2958.2001.02700.x
2.7.4.9	0.19	dTMP	Ureaplasma urealyticum	10.1111/j.1742-4658.2005.05030.x
6.3.4.2	2.85	-	Lactococcus lactis	10.1046/j.1432-1033.2002.03175.x
