# Supplementary material for: Essential metabolism for a minimal cell
Source: eLife. 2019 Jan 18;8:e36842. doi: 10.7554/eLife.36842 (PMC6609329; doi:10.7554/eLife.36842)
Supplement: Supplementary file 8. [file elife-36842-supp8.xlsx]

## Sheet: Removed reactions
Reaction number	Reaction equation	Reaction ID	EC number	Subsystem	Reversibility	GPR rule	Notes
S017	[c]: lipoyl-PdhC + H+ + pyruvate --> S-acetyldihydrolipoyl-PdhC + CO2	PDH-E1	1.2.4.1	Central metabolism	I	MMSYN1_0225 AND MMSYN1_0226	Reaction assumed to be carried out by unknown enzyme in JCVI-syn3A
	[c]: lipoyl-PdhC + H+ + 2-oxobutanoate --> S-propionyldihydrolipoyl-PdhC + CO2	PDH-E1-prop	1.2.1.M8	Central metabolism	I	MMSYN1_0225 AND MMSYN1_0226	Many M. mycoides capri strains can oxidize 2-oxobutanoate (doi: 10.1099/13500872-140-8-2033) and 2-oxobutanoate can be oxidized by pyruvate dehydrogenase at least in rat mitochondria (doi: 10.1042/bj2340295).
	[c]: S-propionyldihydrolipoyl-PdhC + CoA --> propionyl-CoA + dihydrolipoyl-PdhC	PDH-E2-prop	2.3.1.-	Central metabolism	I	MMSYN1_0227	This + next two reactions: Enzymes still there, but source of substrate gone (threonine ammonia lyase, MMSYN1_0120)
	[c]: propionyl-CoA + Phosphate <==> propionyl phosphate + CoA	PTPr	2.3.1.222	Central metabolism	R	MMSYN1_0229
	[c]: ADP + propionyl phosphate <==> propanoate + ATP	PPAKr	2.7.2.15	Central metabolism	R	MMSYN1_0230
S023	[c]: (2) NADH + O2 + (2) H+ --> (2) H2O + (2) NAD+	NOX	1.6.3.4	Central metabolism	I	MMSYN1_0223	Reaction assumed to be carried out by some other oxidoreductase in JCVI-syn3A
	[c]: NADH + H+ + pyruvate <==> D-lactate + NAD+	LDH_D	1.1.1.28	Central metabolism	R	MMSYN1_0036
	[c]: dihydroxyacetone + ATP --> dihydroxyacetone phosphate + ADP + H+	DHAK	2.7.1.29	Central metabolism	I	MMSYN1_0236 AND MMSYN1_0237 AND MMSYN1_0673
	[c]: N-acetyl-D-muramate 6-phosphate + H2O <==> N-acetyl-D-glucosamine 6-phosphate + D-lactate	ACM6PH	4.2.1.126	Central metabolism	R	MMSYN1_0209
	[c]: N-acetylneuraminate <==> N-acetyl-D-mannosamine + pyruvate	ACNML	4.1.3.3	Central metabolism	R	MMSYN1_0498
	[c]: trehalose 6-phosphate + H2O --> D-glucose 6-phosphate + D-glucose	TRE6PH	3.2.1.93	Central metabolism	I	MMSYN1_0674
	[c]: D-mannitol 1-phosphate + NAD+ <==> D-fructose 6-phosphate + NADH + H+	M1PD	1.1.1.17	Central metabolism	R	MMSYN1_0019
	[c]: D-sorbitol 6-phosphate + NAD+ <==> D-fructose 6-phosphate + NADH + H+	SBTPD	1.1.1.140	Central metabolism	R	MMSYN1_0022
	[c]: D-fructose 1-phosphate + ATP --> ADP + D-fructose 1,6-bisphosphate + H+	FRUK	2.7.1.56	Central metabolism	I	MMSYN1_0744
	[c]: α-1,6-D-glucan + (n-1) H2O --> (n) D-glucose	16BGHe	3.2.1.70	Central metabolism	I	MMSYN1_0186	1→6-β-galactan is the polysaccharide produced by M. mycoides capri GM12/JCVI-syn1.0 → Possible substrate?
	[c]: α-1,4-;α-1,6-glucan + (7n-1) H2O --> (3n) panose + (3n) maltose + (n) D-glucose	1416GH	3.2.1.135	Central metabolism	I	MMSYN1_0177 OR MMSYN1_0178	Neopullulanase stochiometry taken from Bacillus stearothermophilus (doi: 10.1128/jb.171.1.369-374.1989)
	[c]: maltose + Phosphate <==> D-glucose + D-glucose 1-phosphate	MPL	2.4.1.8	Central metabolism	R	MMSYN1_0185
	[c]: uridine + Phosphate <==> D-ribose 1-phosphate + uracil	URIPP	2.4.2.2	Nucleotide metabolism	R	MMSYN1_0734
	[c]: deoxyuridine + Phosphate <==> 2-deoxy-D-ribose 1-phosphate + uracil	DURIPP	2.4.2.2	Nucleotide metabolism	R	MMSYN1_0734
	[c]: thymidine + Phosphate <==> 2-deoxy-D-ribose 1-phosphate + thymine	TMDPP	2.4.2.2	Nucleotide metabolism	R	MMSYN1_0734
	[c]: GMP + NADPH + H+ --> IMP + NADP+ + NH3	GMPR	1.7.1.7	Nucleotide metabolism	I	MMSYN1_0050
	[c]: IMP + L-aspartate + GTP --> adenylo-succinate + GDP + phosphate + (2) H+	ADSS	6.3.4.4	Nucleotide metabolism	I	MMSYN1_0766
	[c]: adenylo-succinate <==> AMP + fumarate	ADSL1r	4.3.2.2	Nucleotide metabolism	R	MMSYN1_0765
	[c]: uridine + ATP --> ADP + UMP + H+	URIK1	2.7.1.48	Nucleotide metabolism	I	MMSYN1_0491
	[c]: cytidine + ATP --> ADP + CMP + H+	CYTDK1	2.7.1.48	Nucleotide metabolism	I	MMSYN1_0491
	[c]: 4'-phosphopantetheine + ATP + H+ --> 3'-dephospho-coenzyme A + diphosphate	PTPATi	2.7.7.3	Cofactor metabolism	I	MMSYN1_0232
	[c]: 3'-dephospho-coenzyme A + ATP --> coenzyme A + ADP	DPCOAK	2.7.1..24	Cofactor metabolism	I	MMSYN1_0103
	[c]: PdhC + (R)-lipoate + ATP --> lipoyl-PdhC + AMP + diphosphate + H+	LIPL	6.3.1.20	Cofactor metabolism	I	MMSYN1_0224 OR MMSYN1_0464
	[c]: thiamin + ATP --> thiamin diphosphate + AMP + H+	TMDPPK	2.7.6.2	Cofactor metabolism	I	MMSYN1_0261
	[c]: agmatine + H2O --> N-carbamoylputrescine + NH3 + H+	AGMDA	3.5.3.12	Amino acid metabolism	I	MMSYN1_0626	The possibility of arginine degradation is unclear. Adehan et al. (doi:10.1016/j.smallrumres.2005.01.014) report no arginine catabolism by M. mycoides capri LC. In line with this, Jones et al. (doi:10.1016/j.bioorg.2009.11.004) demonstrated high specificity of Helicobacter pylori agmatine deiminase for agmatine over arginine. However, in the absence of a clear candidate for arginine decarboxylase…
	[c]: L-citrulline + phosphate + H+ <==> L-ornithine + carbamoyl phosphate	OCT	2.1.3.3	Amino acid metabolism	R	MMSYN1_0628 OR MMSYN1_0786
	[c]: carbamoyl phosphate + ADP + H+ <==> CO2 + ATP + NH3	CBMKr	2.7.2.2	Amino acid metabolism	R	MMSYN1_0625 OR MMSYN1_0784
	[c]: L-aspartate + NH3 + ATP --> L-asparagine + AMP + diphosphate	ASNS2	6.3.1.1	Amino acid metabolism	I	MMSYN1_0883
	[c]: L-alanine + NAD+ + H2O <==> pyruvate + NADH + NH3 + (2) H+	ALAD_L	1.4.1.1	Amino acid metabolism	R	MMSYN1_0059
	[c]: L-threonine --> 2-oxobutanoate + NH3 + H+	THRD_L	4.3.1.19	Amino acid metabolism	I	MMSYN1_0120
	[c]: Protein-L-methionine-(S)-S-oxide + reduced thioredoxin --> Protein-L-methionine + oxidized thioredoxin + H2O	PMETSSOXR	1.8.4.11	Macromolecules	I	MMSYN1_0699
	[c]: Protein-L-methionine-(S)-S-oxide + reduced thioredoxin --> Protein-L-methionine + oxidized thioredoxin + H2O	PMETRSOXR	1.8.4.12	Macromolecules	I	MMSYN1_0699
	[c]: tRNA-guanine-46 + S-adenosyl-L-methionine --> tRNA-N7-methylguanine-46 + S-adenosyl-L-homocysteine	GUAMETTR	2.1.1.33	RNA modification	I	MMSYN1_0156
	[c]: RNA-nucleoside + 5,10-methylenetetrahydrofolate tri-L-glutamate + FADH2 --> RNA-methyl-nucleoside + tetrahydrofolate tri-L-glutamate + FAD + H+		2.1.1.-	RNA modification	I	MMSYN1_0313	Annotated as putative tRNA:m(5)U-54 methyltransferase; however, Lartigue et al. (doi: 10.1093/nar/gku518) ruled out this activity for the homolog in M. capricolum (Mcap0613). True substrate unknown.
	mannitol[e] + phosphoenolpyruvate[c] --> mannitol 1-phosphate[c] + pyruvate[c]	MNLpts	2.7.3.9/2.7.1.197	Transport	I	MMSYN1_0233 AND MMSYN1_0694 AND MMSYN1_0021 AND MMSYN1_0023
	sorbitol[e] + phosphoenolpyruvate[c] --> sorbitol 6-phosphate[c] + pyruvate[c]	SBTpts	2.7.3.9/2.7.1.198	Transport	I	MMSYN1_0233 AND MMSYN1_0694 AND MMSYN1_0021 AND MMSYN1_0023	Location of gene for sorbitol 6-phosphate dehydrogenase between mannitol PTS genes suggests sorbitol as possible additional substrate. A precedent exists in Vibrio cholerae (doi: 10.1007/s00203-010-0663-8).
	fructose[e] + phosphoenolpyruvate[c] --> fructose 1-phosphate[c] + pyruvate[c]	FRUpts	2.7.3.9/2.7.1.202	Transport	I	MMSYN1_0233 AND MMSYN1_0694 AND MMSYN1_0743 AND MMSYN1_0762
	trehalose[e] + phosphoenolpyruvate[c] --> trehalose 6-phosphate[c] + pyruvate[c]	TREpts	2.7.3.9/2.7.1.201	Transport	I	MMSYN1_0233 AND MMSYN1_0694 AND MMSYN1_0675	EIIA component unknown, but trehalose consumption observed in M. mycoides capri PG3 (doi: 10.1099/13500872-140-8-2033), so intact PTS system probably present; also note adjacent trehalase (MMSYN1_0674).
	N-acetylmuramic acid[e] + phosphoenolpyruvate[c] --> N-acetylmuramic acid 6-phosphate[c] + pyruvate[c]	ACMUMpts	2.7.3.9/2.7.1.192	Transport	I	MMSYN1_0233 AND MMSYN1_0694 AND MMSYN1_0210	EIIA component unknown, but presence of adjacent N-acetylmuramic acid 6-phosphate etherase (MMSYN1_0209) suggests presence of N-acetylmuramic acid PTS system.
	N-acetyl-D-glucosamine[e] + phosphoenolpyruvate[c] --> N-acetyl-D-glucosamine 6-phosphate[c] + pyruvate[c]	ACGApts	2.7.3.9/2.7.1.193	Transport	I	MMSYN1_0233 AND MMSYN1_0694 AND MMSYN1_0125	EIIA component unknown, but N-acetylglucosamine utilization observed in M. mycoides capri PG3 (doi: 10.1099/13500872-140-8-2033) and M. mycoides mycoides (doi: 10.1099/00221287-131-8-1845), so intact PTS probably present.
	maltose[e] + Sodium[c] + H2O[c] + ATP[c] --> maltose[c] + ADP[c] + Phosphate[c] + H+[c]	MALTabc	3.6.3.19	Transport	I	MMSYN1_0182 AND MMSYN1_0183 AND MMSYN1_0184
S176	glycerol[e] <==> glycerol[c]	GLYCt	-	Transport	R	MMSYN1_0217	Reaction assumed to occur by passive permeation in JCVI-syn3A
	Sulfate[e] + H2O[c] + ATP[c] --> Sulfate[c] + ADP[c] + Phosphate[c] + H+[c]	SO4abc	-	Transport	I	MMSYN1_0192 AND MMSYN1_0193	Deleted genes are homologs of sulfate import genes in Mycoplasma hyopneumoniae
	CMP[e] + H2O[c] + ATP[c] --> CMP[c] + ADP[c] + Phosphate[c] + H+[c]	CMPabc	-	Transport	I		Activity reported for M. mycoides capri (transporter and mechanism unknown) but assumed to be absent in JCVI-syn3A
	dAMP[e] + H2O[c] + ATP[c] --> dAMP[c] + ADP[c] + Phosphate[c] + H+[c]	DAMPabc	-	Transport	I		Activity reported for M. mycoides capri (transporter and mechanism unknown) but assumed to be absent in JCVI-syn3A
	dGMP[e] + H2O[c] + ATP[c] --> dGMP[c] + ADP[c] + Phosphate[c] + H+[c]	DGMPabc	-	Transport	I		Activity reported for M. mycoides capri (transporter and mechanism unknown) but assumed to be absent in JCVI-syn3A
	dCMP[e] + H2O[c] + ATP[c] --> dCMP[c] + ADP[c] + Phosphate[c] + H+[c]	DCMPabc	-	Transport	I		Activity reported for M. mycoides capri (transporter and mechanism unknown) but assumed to be absent in JCVI-syn3A
	dTMP[e] + H2O[c] + ATP[c] --> dTMP[c] + ADP[c] + Phosphate[c] + H+[c]	DTMPabc	-	Transport	I		Activity reported for M. mycoides capri (transporter and mechanism unknown) but assumed to be absent in JCVI-syn3A
